# Supplementary material for: Brønsted acid-induced transannulation of the phytochemical zerumbone
Source: Royal Society of Chemistry journal article supplement (doi:10.1039/d1ob01634b), 2021-01-01
Supplement: d1ob01634b1.pdf [file d1ob01634b1.pdf]

## Supporting Information

### Brønsted acid-induced transannulation of the phytochemical zerumbone

Gengo Kashiwazaki,<sup>a\*‡</sup> Ryo Watanabe,<sup>a‡</sup> Terutaka Tsuzuki,<sup>a</sup> Chieko Yamamoto,<sup>a</sup> Atsuya Nishikawa,<sup>a</sup> Satoru Ohtomo,<sup>a</sup> Tomomi Yoshikawa,<sup>a</sup> Yuto Kitamura,<sup>a</sup> Yoshimi Utaka,<sup>a</sup> Yasushi Kawai,<sup>b</sup> Noriko Tsuchida,<sup>c</sup> and Takashi Kitayama<sup>a\*</sup>

<sup>a</sup>Major in Advanced Bioscience, Graduate School of Agriculture, Kindai University, Nara, Nara 631-8505, Japan

<sup>b</sup>Faculty of Bioscience, Nagahama Institute of Bio-Science and Technology, Nagahama, Shiga 526-0829, Japan

<sup>c</sup>Faculty of Medicine, Saitama Medical University, Moroyama, Saitama 350-0495, Japan

<sup>‡</sup>These authors contributed equally.

\*To whom correspondence should be addressed. E-mail: kashigen@nara.kindai.ac.jp, and kitayama@nara.kindai.ac.jp

### Table of contents

|                                                                                                                                                                                                                                   |               |
|-----------------------------------------------------------------------------------------------------------------------------------------------------------------------------------------------------------------------------------|---------------|
| The structures of compounds <b>1–10</b> .....                                                                                                                                                                                     | Figure S1     |
| Time-dependent conversions of <b>1</b> , <b>4–10</b> under HCl in ethyl acetate .....                                                                                                                                             | Table S1–7    |
| <sup>1</sup> H and <sup>13</sup> C NMR comparison between (2 <i>Z</i> )-zerumbone ( <b>4</b> ) and (2 <i>Z</i> ,6 <i>Z</i> )-zerumbone ( <b>1d</b> ) .....                                                                        | Table S8      |
| <b>NMR spectra</b>                                                                                                                                                                                                                |               |
| <sup>1</sup> H NMR, <sup>13</sup> C{ <sup>1</sup> H} NMR, DEPT-135, <sup>1</sup> H- <sup>1</sup> H COSY, <sup>1</sup> H- <sup>13</sup> C HMQC, <sup>1</sup> H- <sup>13</sup> C HMBC, and ROESY spectra of compound <b>4</b> ..... | Figure S2–8   |
| <sup>1</sup> H NMR, <sup>13</sup> C{ <sup>1</sup> H} NMR, DEPT-135, <sup>1</sup> H- <sup>1</sup> H COSY, <sup>1</sup> H- <sup>13</sup> C HMQC, and <sup>1</sup> H- <sup>13</sup> C HMBC spectra of compound <b>5</b> .....        | Figure S9–14  |
| <sup>1</sup> H NMR, <sup>13</sup> C{ <sup>1</sup> H} NMR, DEPT-135, <sup>1</sup> H- <sup>1</sup> H COSY, <sup>1</sup> H- <sup>13</sup> C HMQC, and <sup>1</sup> H- <sup>13</sup> C HMBC spectra of compound <b>6</b> .....        | Figure S15–20 |
| <sup>1</sup> H NMR, <sup>13</sup> C{ <sup>1</sup> H} NMR, DEPT-135, <sup>1</sup> H- <sup>1</sup> H COSY, <sup>1</sup> H- <sup>13</sup> C HMQC, and <sup>1</sup> H- <sup>13</sup> C HMBC spectra of compound <b>7</b> .....        | Figure S21–26 |
| <sup>1</sup> H NMR, <sup>13</sup> C{ <sup>1</sup> H} NMR, DEPT-135, <sup>1</sup> H- <sup>1</sup> H COSY, <sup>1</sup> H- <sup>13</sup> C HMQC, and <sup>1</sup> H- <sup>13</sup> C HMBC spectra of compound <b>8</b> .....        | Figure S27–32 |

|                                                                                                                                                                                                                                       |               |
|---------------------------------------------------------------------------------------------------------------------------------------------------------------------------------------------------------------------------------------|---------------|
| $^1\text{H}$ NMR, $^{13}\text{C}\{^1\text{H}\}$ NMR, DEPT-135, $^1\text{H}$ - $^1\text{H}$ COSY, $^1\text{H}$ - $^{13}\text{C}$ HMQC, and $^1\text{H}$ - $^{13}\text{C}$ HMBC spectra of isomers <b>9</b> and <b>10</b> .....         | Figure S33–38 |
| $^1\text{H}$ NMR, $^{13}\text{C}\{^1\text{H}\}$ NMR, DEPT-135, $^1\text{H}$ - $^1\text{H}$ COSY, $^1\text{H}$ - $^{13}\text{C}$ HMQC, and $^1\text{H}$ - $^{13}\text{C}$ HMBC spectra of compound <b>2</b> .....                      | Figure S39–44 |
| $^1\text{H}$ NMR, $^{13}\text{C}\{^1\text{H}\}$ NMR, DEPT-135, $^1\text{H}$ - $^1\text{H}$ COSY, $^1\text{H}$ - $^{13}\text{C}$ HMQC, and $^1\text{H}$ - $^{13}\text{C}$ HMBC spectra of compound <b>3</b> .....                      | Figure S45–50 |
| $^1\text{H}$ NMR, $^{13}\text{C}\{^1\text{H}\}$ NMR, DEPT-135, $^1\text{H}$ - $^1\text{H}$ COSY, $^1\text{H}$ - $^{13}\text{C}$ HMQC, and $^1\text{H}$ - $^{13}\text{C}$ HMBC spectra of compound ( <i>2RS,3SR</i> )- <b>11</b> ..... | Figure S51–56 |
| $^1\text{H}$ NMR, $^{13}\text{C}\{^1\text{H}\}$ NMR, DEPT-135, $^1\text{H}$ - $^1\text{H}$ COSY, $^1\text{H}$ - $^{13}\text{C}$ HMQC, and $^1\text{H}$ - $^{13}\text{C}$ HMBC spectra of compound ( <i>2RS,3RS</i> )- <b>11</b> ..... | Figure S57–62 |
| $^1\text{H}$ NMR, $^{13}\text{C}\{^1\text{H}\}$ NMR, DEPT-135, $^1\text{H}$ - $^1\text{H}$ COSY, $^1\text{H}$ - $^{13}\text{C}$ HMQC, and $^1\text{H}$ - $^{13}\text{C}$ HMBC spectra of compound <b>12</b> .....                     | Figure S63–68 |
| $^1\text{H}$ NMR, $^{13}\text{C}\{^1\text{H}\}$ NMR, DEPT-135, $^1\text{H}$ - $^1\text{H}$ COSY, $^1\text{H}$ - $^{13}\text{C}$ HMQC, and $^1\text{H}$ - $^{13}\text{C}$ HMBC spectra of compound <b>13</b> .....                     | Figure S69–74 |
| $^1\text{H}$ NMR, $^{13}\text{C}\{^1\text{H}\}$ NMR, DEPT-135, $^1\text{H}$ - $^1\text{H}$ COSY, $^1\text{H}$ - $^{13}\text{C}$ HMQC, and $^1\text{H}$ - $^{13}\text{C}$ HMBC spectra of compound <b>14</b> .....                     | Figure S75–80 |
| X-ray crystal structures of compounds <b>5</b> , <b>6</b> , <b>8</b> , ( <i>2RS,3RS</i> )- <b>11</b> , ( <i>2RS,3SR</i> )- <b>11</b> , <b>12</b> , and <b>14</b> .....                                                                | Figure S81–87 |
| Crystal data and structure refinement of compounds <b>5</b> , <b>6</b> , <b>8</b> , ( <i>2RS,3RS</i> )- <b>11</b> , ( <i>2RS,3SR</i> )- <b>11</b> , <b>12</b> , and <b>14</b> .....                                                   | Table S9–15   |
| Energy profile for the ( <i>2E,6E,10E</i> ) to ( <i>2E,6E,10Z</i> )-isomer, and the optimized geometries .....                                                                                                                        | Figure S88    |
| Cartesian coordinates and Gibbs free energies .....                                                                                                                                                                                   | Table S16     |

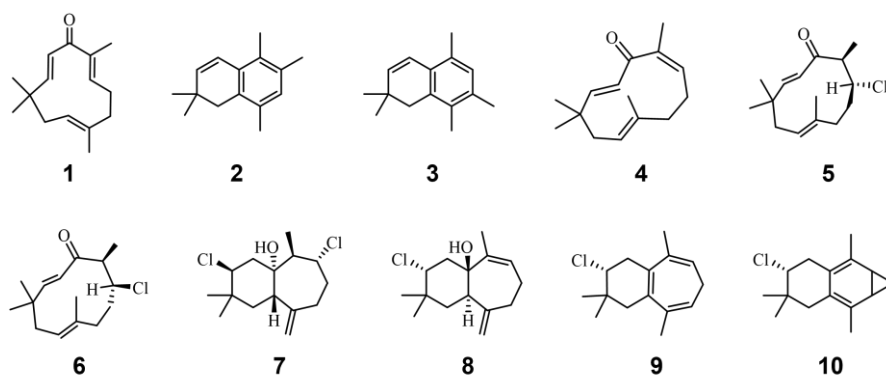

**Figure S1.** The structures of compounds 1–10.

**Table S1.** Time-dependent conversion of 1 under HCl in ethyl acetate

| Time (h) | compound |    |    |    |    |    |       |      |
|----------|----------|----|----|----|----|----|-------|------|
|          | 1        | 4  | 5  | 6  | 7  | 8  | 9, 10 | 2, 3 |
| 0        | 98       | 0  | 0  | 0  | 0  | 0  | 0     | 0    |
| 0.5      | 24       | 25 | 18 | 11 | 2  | 13 | 0     | 0    |
| 1        | 14       | 12 | 27 | 8  | 6  | 24 | 1     | 0    |
| 1.5      | 9        | 6  | 32 | 5  | 10 | 27 | 2     | 0    |
| 2        | 8        | 5  | 32 | 4  | 12 | 27 | 3     | 0    |
| 2.5      | 6        | 4  | 34 | 3  | 13 | 27 | 4     | 0    |
| 3        | 5        | 3  | 33 | 1  | 14 | 26 | 5     | 0    |
| 3.5      | 4        | 2  | 33 | 1  | 15 | 24 | 6     | 0    |
| 4        | 4        | 2  | 32 | 1  | 17 | 23 | 6     | 0    |
| 6        | 3        | 1  | 30 | 1  | 18 | 20 | 10    | 0    |
| 24       | 2        | 0  | 8  | 0  | 23 | 5  | 28    | 0    |
| 96       | 0        | 0  | 0  | 0  | 17 | 6  | 22    | 12   |
| 192      | 0        | 0  | 0  | 0  | 20 | 12 | 17    | 23   |
| 336      | 0        | 0  | 0  | 0  | 3  | 14 | 3     | 33   |

**Table S2.** Time-dependent conversion of 4 under HCl in ethyl acetate

| Time (h) | compound |    |    |   |    |    |       |      |
|----------|----------|----|----|---|----|----|-------|------|
|          | 1        | 4  | 5  | 6 | 7  | 8  | 9, 10 | 2, 3 |
| 0        | 0        | 95 | 0  | 0 | 0  | 0  | 0     | 0    |
| 0.5      | 0        | 9  | 4  | 4 | 3  | 56 | 0     | 0    |
| 6        | 0        | 2  | 12 | 0 | 13 | 46 | 11    | 0    |
| 24       | 0        | 0  | 0  | 0 | 16 | 21 | 36    | 0    |
| 72       | 0        | 0  | 0  | 0 | 18 | 0  | 50    | 1    |

**Table S3.** Time-dependent conversion of **8** under HCl in ethyl acetate

| Time (h) | compound |          |          |          |          |          |              |             |
|----------|----------|----------|----------|----------|----------|----------|--------------|-------------|
|          | <b>1</b> | <b>4</b> | <b>5</b> | <b>6</b> | <b>7</b> | <b>8</b> | <b>9, 10</b> | <b>2, 3</b> |
| 0        | 0        | 0        | 0        | 0        | 0        | 97       | 0            | 0           |
| 1        | 0        | 0        | 0        | 0        | 0        | 76       | 4            | 0           |
| 2        | 0        | 0        | 0        | 0        | 0        | 61       | 12           | 0           |
| 4        | 0        | 0        | 0        | 0        | 0        | 20       | 30           | 0           |
| 8        | 0        | 0        | 0        | 0        | 0        | 15       | 37           | 0           |
| 24       | 0        | 0        | 0        | 0        | 0        | 0        | 47           | 0           |
| 48       | 0        | 0        | 0        | 0        | 0        | 0        | 34           | 4           |
| 72       | 0        | 0        | 0        | 0        | 0        | 0        | 29           | 14          |

**Table S4.** Time-dependent conversion of **9, 10** under HCl in ethyl acetate

| Time (h) | compound |          |          |          |          |          |              |             |
|----------|----------|----------|----------|----------|----------|----------|--------------|-------------|
|          | <b>1</b> | <b>4</b> | <b>5</b> | <b>6</b> | <b>7</b> | <b>8</b> | <b>9, 10</b> | <b>2, 3</b> |
| 0        | 0        | 0        | 0        | 0        | 0        | 0        | 96           | 0           |
| 0.5      | 0        | 0        | 0        | 0        | 0        | 0        | 94           | 0           |
| 4        | 0        | 0        | 0        | 0        | 0        | 0        | 93           | 0           |
| 6        | 0        | 0        | 0        | 0        | 0        | 0        | 91           | 0           |
| 8        | 0        | 0        | 0        | 0        | 0        | 0        | 88           | 0           |
| 24       | 0        | 0        | 0        | 0        | 0        | 0        | 80           | 5           |
| 168      | 0        | 0        | 0        | 0        | 0        | 0        | 34           | 14          |

**Table S5.** Time-dependent conversion of **5** under HCl in ethyl acetate

| Time (h) | compound |          |          |          |          |          |              |             |
|----------|----------|----------|----------|----------|----------|----------|--------------|-------------|
|          | <b>1</b> | <b>4</b> | <b>5</b> | <b>6</b> | <b>7</b> | <b>8</b> | <b>9, 10</b> | <b>2, 3</b> |
| 0        | 0        | 0        | 97       | 0        | 0        | 0        | 0            | 0           |
| 1        | 2        | 0        | 82       | 0        | 1        | 1        | 0            | 0           |
| 2        | 1        | 1        | 72       | 0        | 2        | 5        | 1            | 0           |
| 4        | 5        | 2        | 61       | 0        | 5        | 8        | 2            | 0           |
| 8        | 6        | 2        | 52       | 0        | 10       | 12       | 6            | 0           |
| 24       | 6        | 2        | 28       | 0        | 14       | 11       | 13           | 0           |
| 48       | 6        | 2        | 15       | 0        | 15       | 4        | 22           | 0           |
| 72       | 6        | 4        | 12       | 0        | 14       | 4        | 21           | 0           |

**Table S6.** Time-dependent conversion of **6** under HCl in ethyl acetate

| Time (h) | compound |          |          |          |          |          |              |             |
|----------|----------|----------|----------|----------|----------|----------|--------------|-------------|
|          | <b>1</b> | <b>4</b> | <b>5</b> | <b>6</b> | <b>7</b> | <b>8</b> | <b>9, 10</b> | <b>2, 3</b> |
| 0        | 0        | 0        | 0        | 95       | 0        | 0        | 0            | 0           |
| 0.02     | 7        | 2        | 8        | 2        | 43       | 0        | 4            | 0           |
| 0.5      | 0        | 0        | 0        | 1        | 72       | 1        | 8            | 0           |
| 1        | 0        | 0        | 0        | 0        | 78       | 3        | 10           | 0           |

**Table S7.** Time-dependent conversion of **7** under HCl in ethyl acetate

| <b>Time (h)</b> | <b>compound</b> |          |          |          |          |          |              |             |
|-----------------|-----------------|----------|----------|----------|----------|----------|--------------|-------------|
|                 | <b>1</b>        | <b>4</b> | <b>5</b> | <b>6</b> | <b>7</b> | <b>8</b> | <b>9, 10</b> | <b>2, 3</b> |
| 0               | 0               | 0        | 0        | 0        | 98       | 0        | 0            | 0           |
| 24              | 0               | 0        | 0        | 0        | 89       | 0        | 0            | 0           |

**Table S8.**  $^1\text{H}$  and  $^{13}\text{C}$  NMR comparison between (2*Z*)-zerumbone (**4**) and (2*Z*,6*Z*)-zerumbone (**1d**)<sup>reference 1</sup>

| position | <b>4</b>                       |                                |                                | <b>1d</b> <sup>reference 1</sup> |                                |                                |
|----------|--------------------------------|--------------------------------|--------------------------------|----------------------------------|--------------------------------|--------------------------------|
|          | $\delta_{\text{C}}^{\text{a}}$ | $\delta_{\text{H}}^{\text{b}}$ | multiplicity ( <i>J</i> in Hz) | $\delta_{\text{C}}^{\text{c}}$   | $\delta_{\text{H}}^{\text{d}}$ | multiplicity ( <i>J</i> in Hz) |
| 1        | 203.1                          |                                |                                | 203.8                            |                                |                                |
| 2        | 137.5                          |                                |                                | 137.5                            |                                |                                |
| 3        | 131.4                          | 5.53                           | m                              | 131.5                            | 5.53                           | m                              |
| 4a, b    | 33.5                           | 2.20–2.09                      | m                              | 33.5                             | 2.18                           | m                              |
| 5a       | 37.1                           | 2.41–2.25                      | m                              | 37.0                             | 2.31 (2H)                      | m                              |
| 5b       |                                | 1.99–1.77                      | m                              |                                  |                                |                                |
| 6        | 137.6                          |                                |                                | 137.0                            |                                |                                |
| 7        | 123.6                          | 5.13                           | m                              | 123.8                            | 5.13                           | t (8.1)                        |
| 8a       | 40.1                           | 2.41–2.25                      | m                              | 40.1                             | 2.05–1.91 (2H)                 | m                              |
| 8b       |                                | 1.99–1.77                      | m                              |                                  |                                |                                |
| 9        | 37.3                           |                                |                                | 42.9                             |                                |                                |
| 10       | 161.4                          | 6.34                           | d (16.2)                       | 161.7                            | 6.34                           | d (16.2)                       |
| 11       | 127.3                          | 5.88                           | d (16.2)                       | 127.5                            | 5.88                           | d (16.2)                       |
| C2-Me    | 21.2                           | 1.90                           | d (1.1)                        | 21.4                             | 1.91                           | s                              |
| C6-Me    | 20.3                           | 1.70                           | d (1.4)                        | 20.7                             | 1.69                           | s                              |
| C9-Me    | 29.4                           | 1.17                           | s                              | 29.3                             | 1.15                           | s                              |
| C9-Me    | 24.2                           | 1.13                           | s                              | 24.2                             | 1.15                           | s                              |

<sup>a</sup>Chemical shifts in  $\text{CDCl}_3$  referenced to TMS ( $\delta_{\text{C}}$  0.0) at 100 MHz.

<sup>b</sup>Chemical shifts in  $\text{CDCl}_3$  referenced to TMS ( $\delta_{\text{H}}$  0.0) at 400 MHz.

<sup>c</sup>Chemical shifts referenced to  $\text{CDCl}_3$  ( $\delta_{\text{C}}$  77.0) at 125 MHz.

<sup>d</sup>Chemical shifts referenced to  $\text{CDCl}_3$  ( $\delta_{\text{H}}$  7.26) at 500 MHz.

reference 1

G. Appendino, A. Minassi, J. A. Collado, F. Pollastro, G. Chianese, O. Tagliatalata-Scafati, M. Ayyari, V. Garcia and E. Muñoz, *Eur. J. Org. Chem.*, 2015, **2015**, 3721-3726.

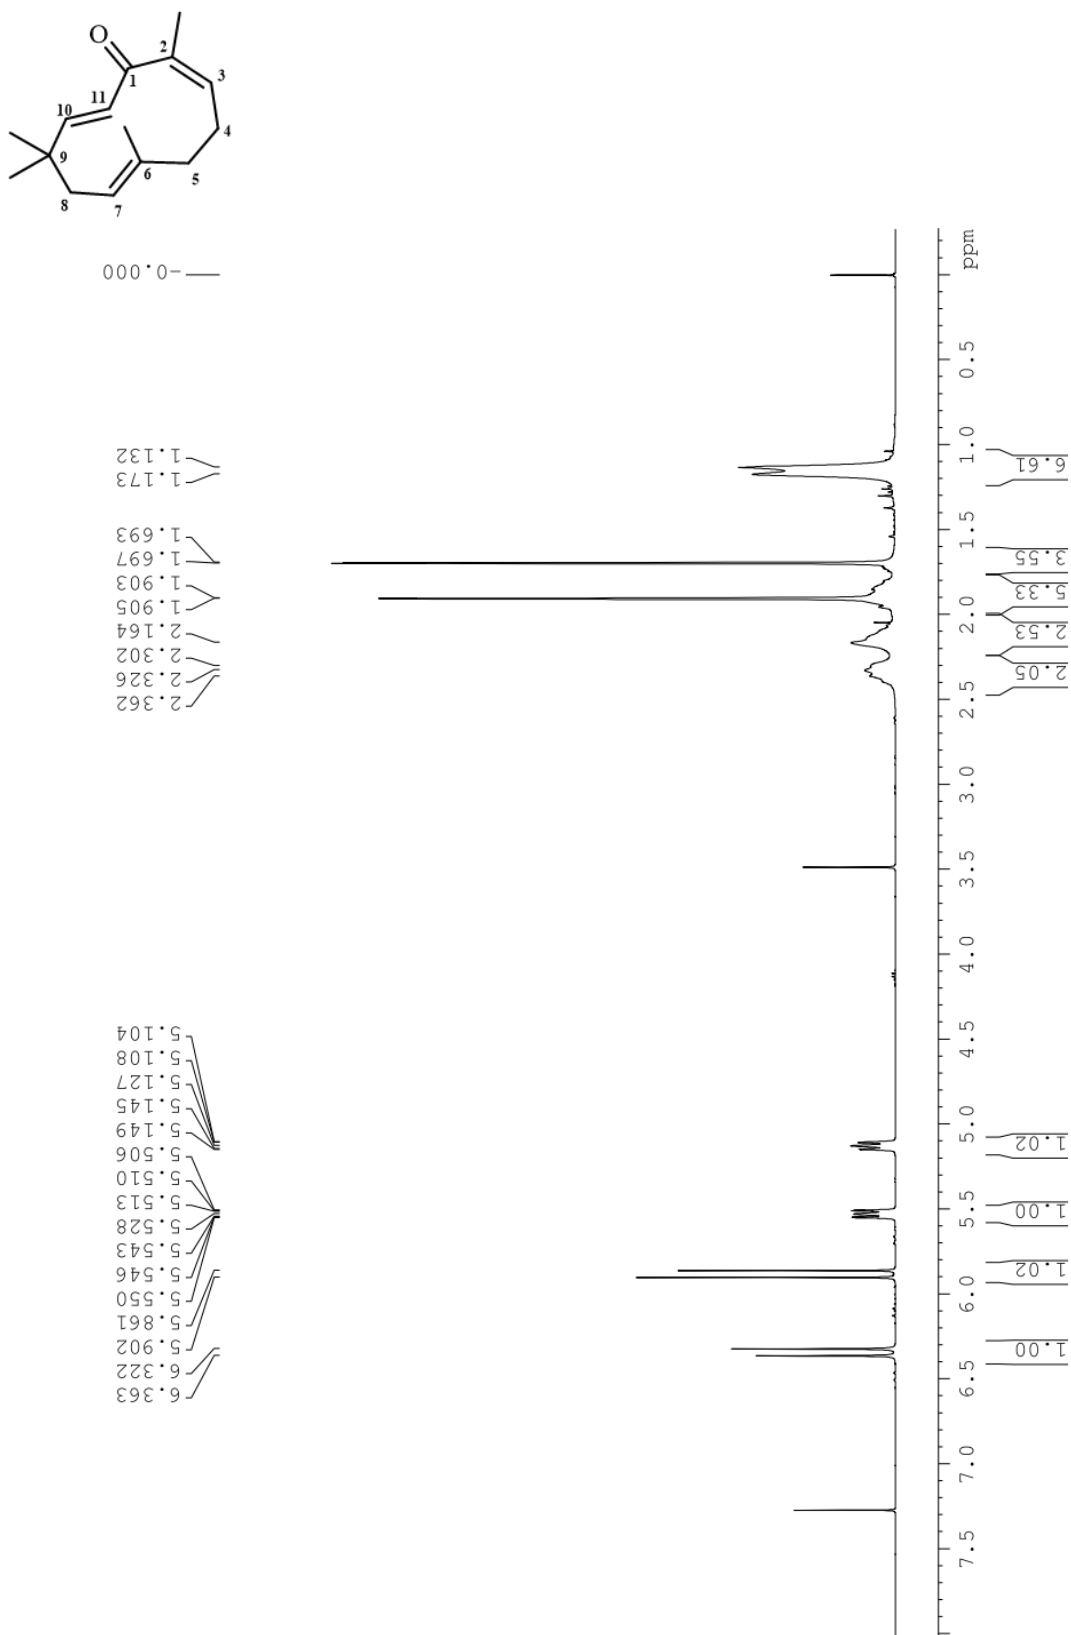

**Figure S2.**  $^1\text{H}$  NMR spectrum of **4** ( $\text{CDCl}_3$ , 400 MHz).

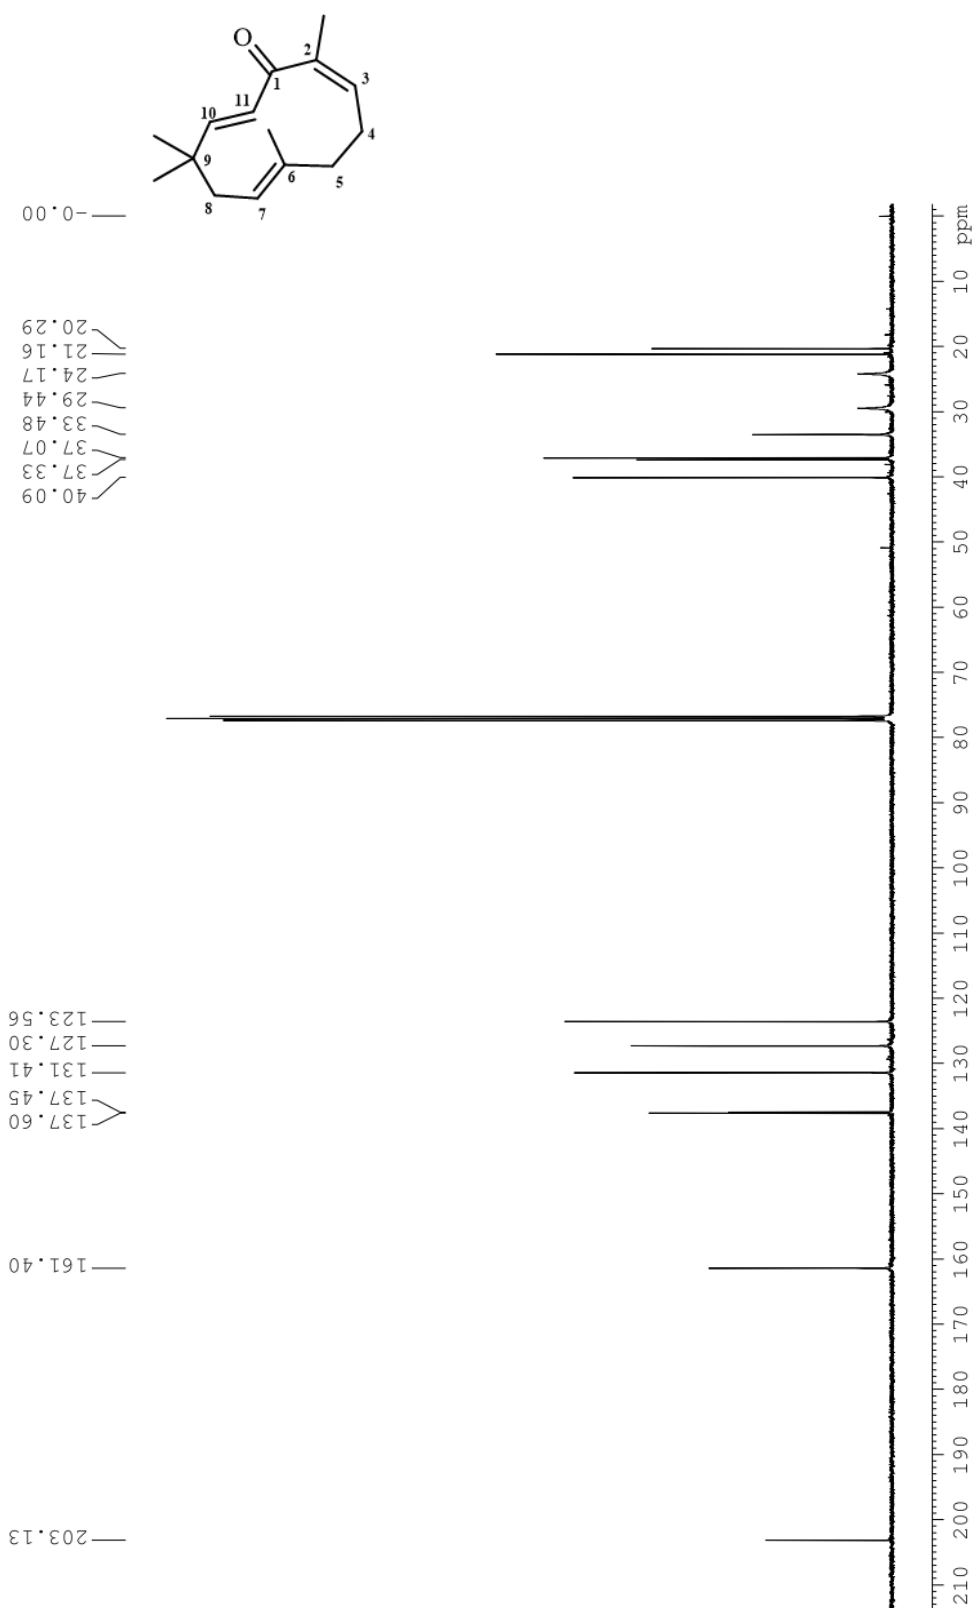

**Figure S3.**  $^{13}\text{C}\{^1\text{H}\}$  NMR spectrum of **4** ( $\text{CDCl}_3$ , 100 MHz).



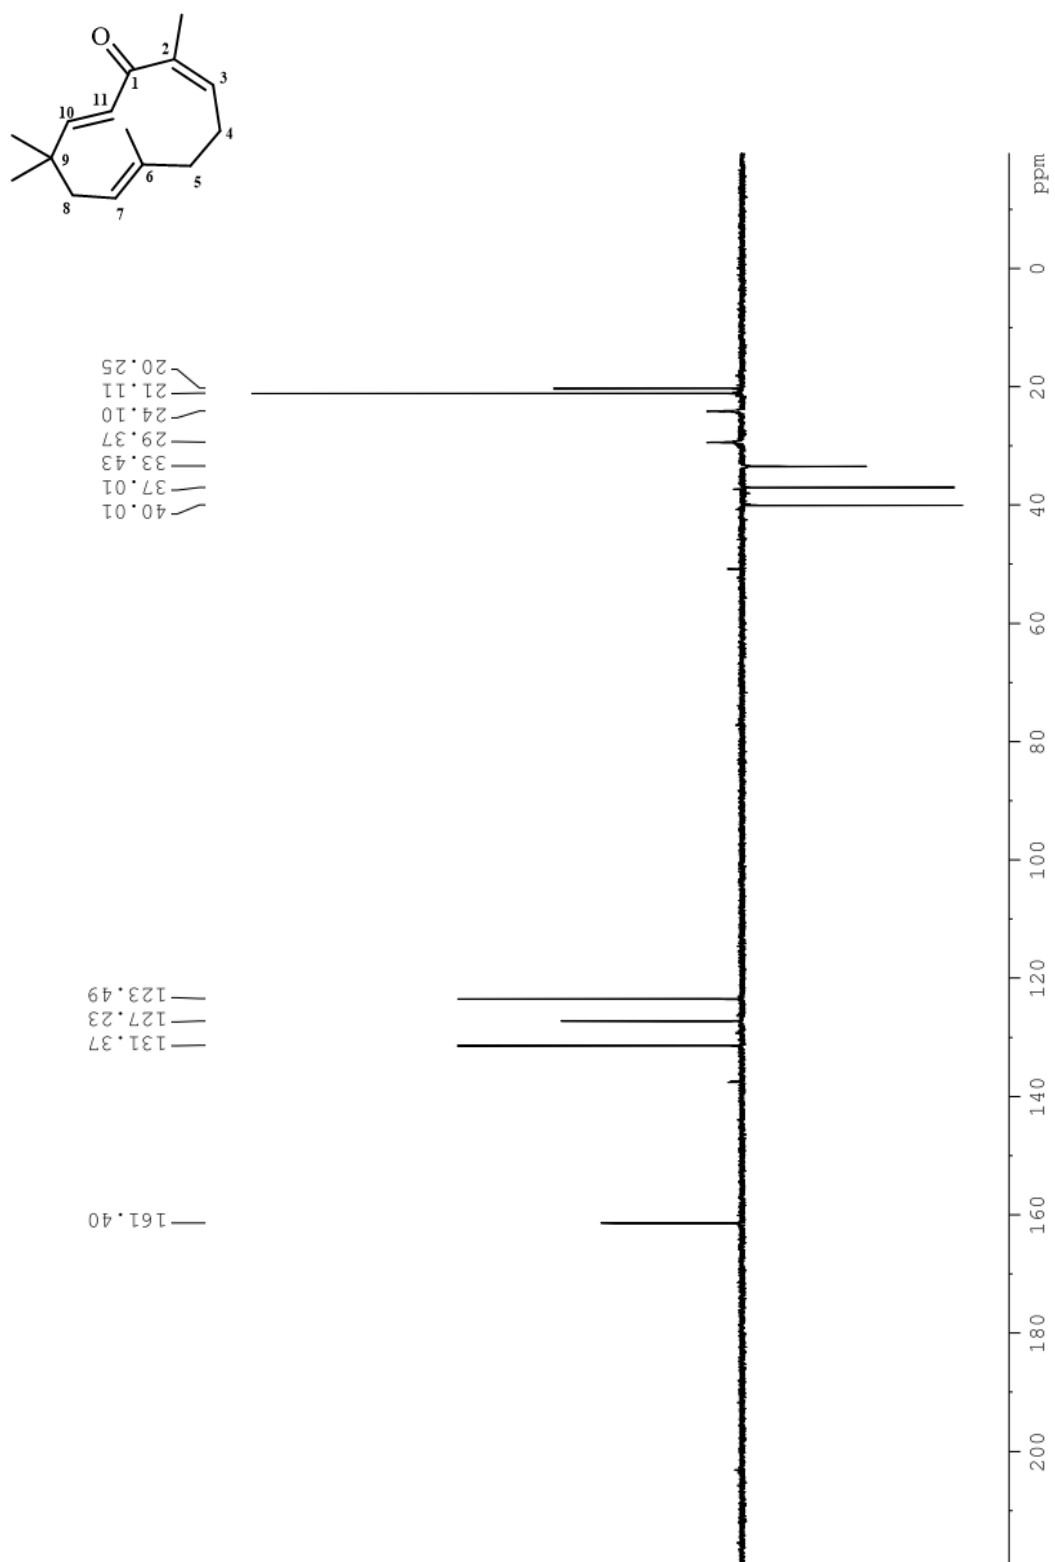

**Figure S4.** DEPT-135 spectrum of **4** ( $\text{CDCl}_3$ , 100 MHz).

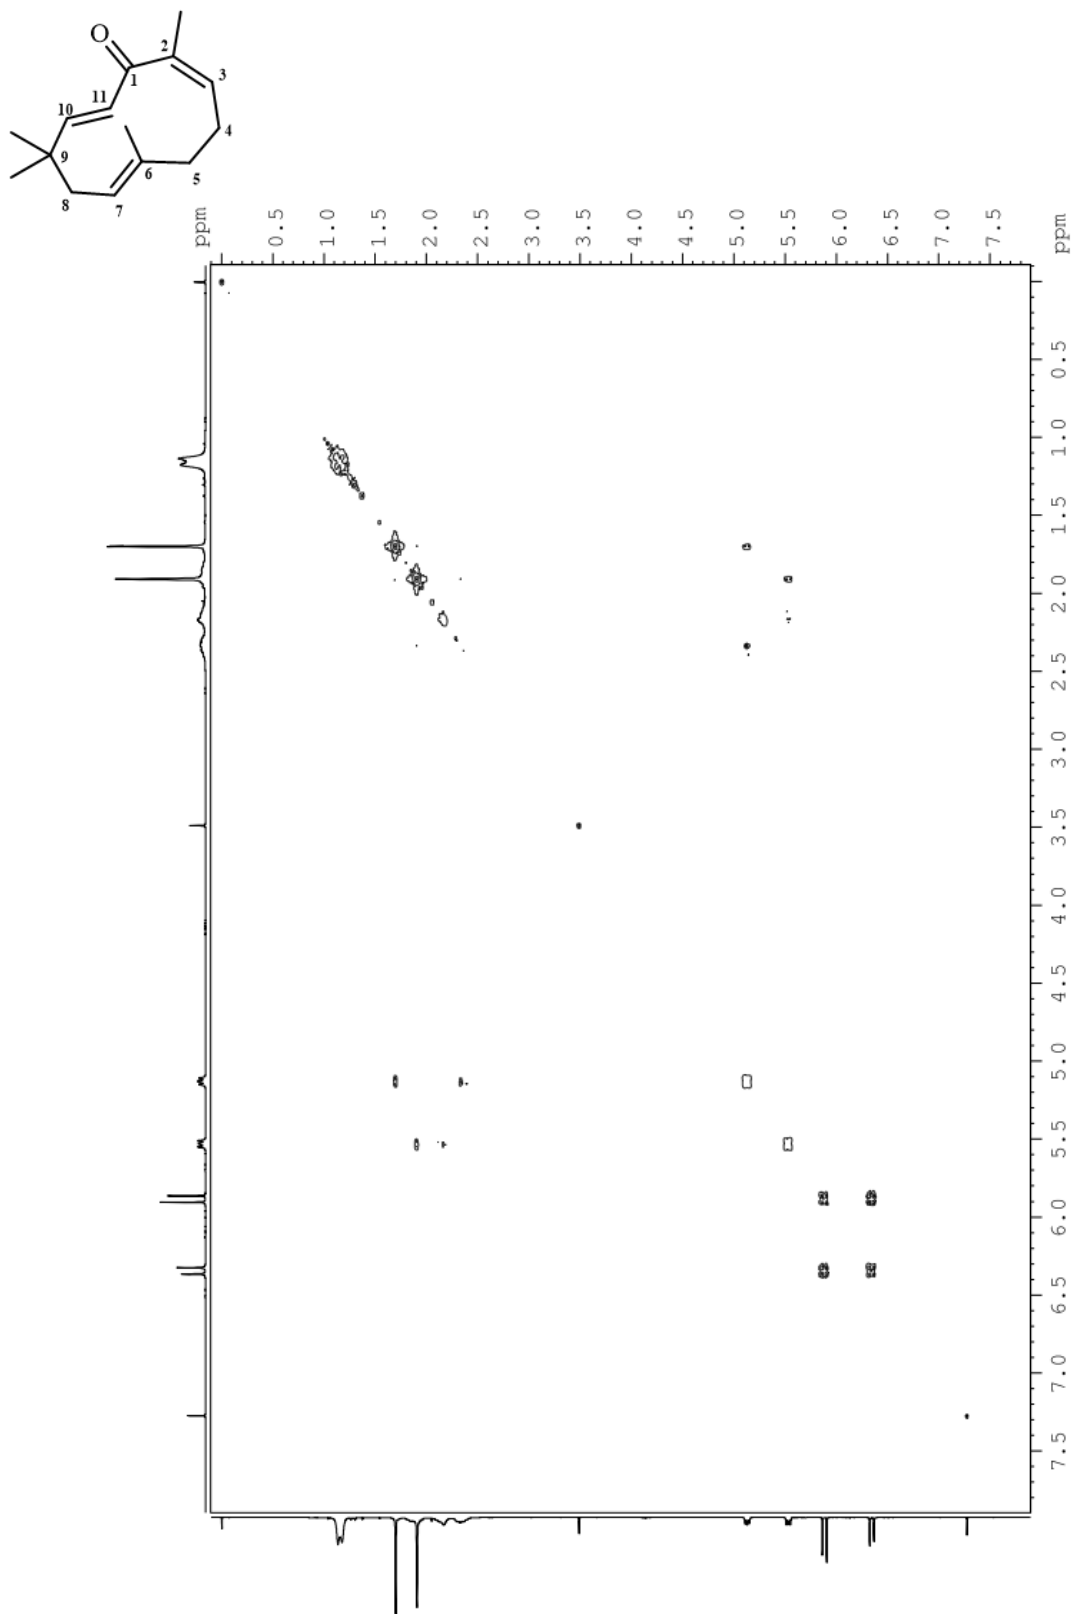

**Figure S5.**  $^1\text{H}$ - $^1\text{H}$  COSY of **4** ( $\text{CDCl}_3$ , 400 MHz).

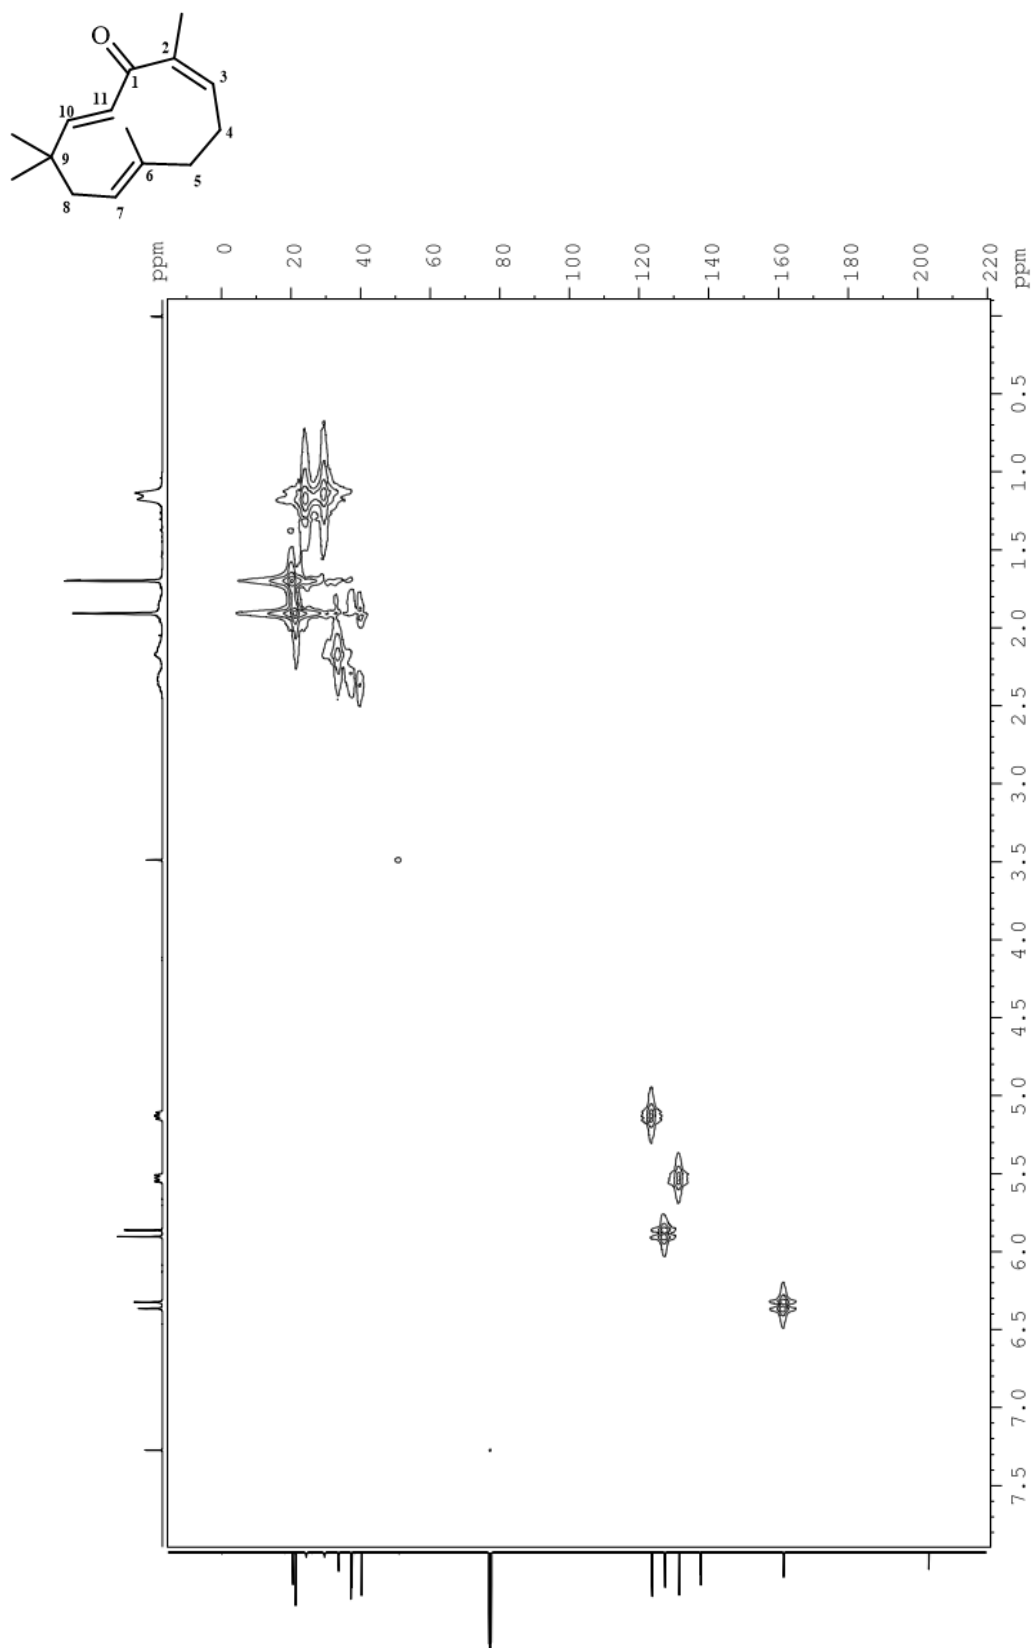

**Figure S6.**  $^1\text{H}$ - $^{13}\text{C}$  HMQC of **4** ( $\text{CDCl}_3$ , 400 MHz).

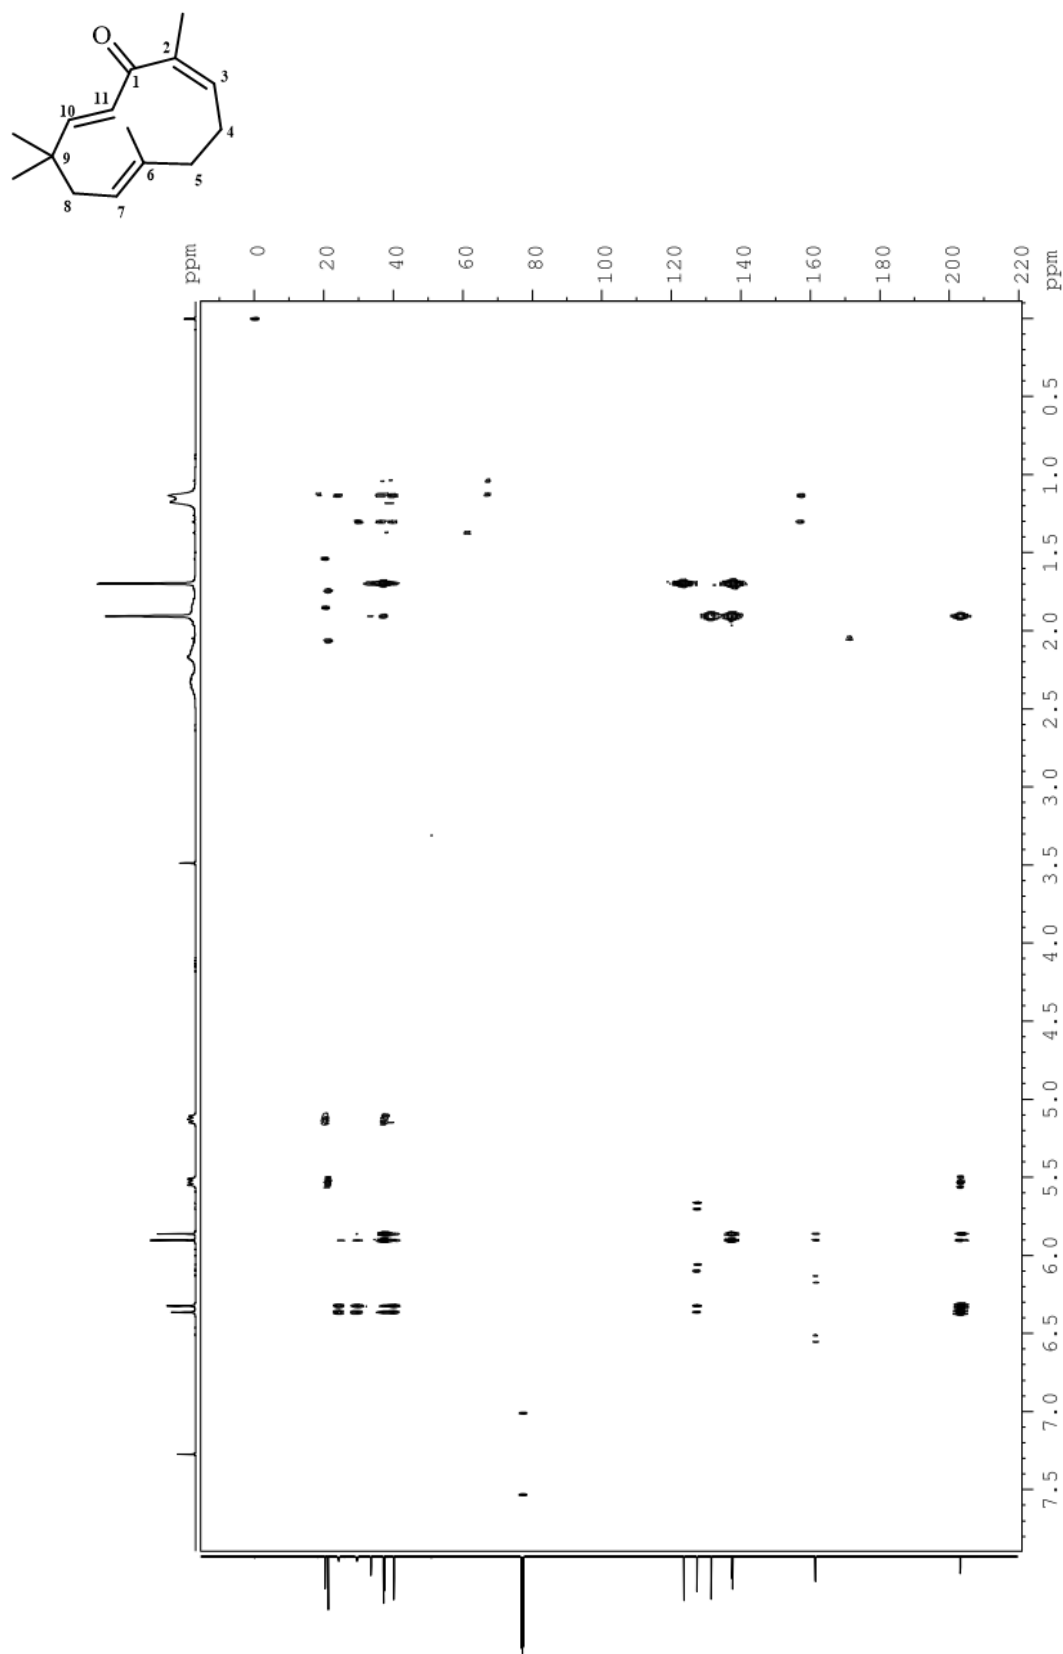

**Figure S7.**  $^1\text{H}$ - $^{13}\text{C}$  HMBC of **4** ( $\text{CDCl}_3$ , 400 MHz).

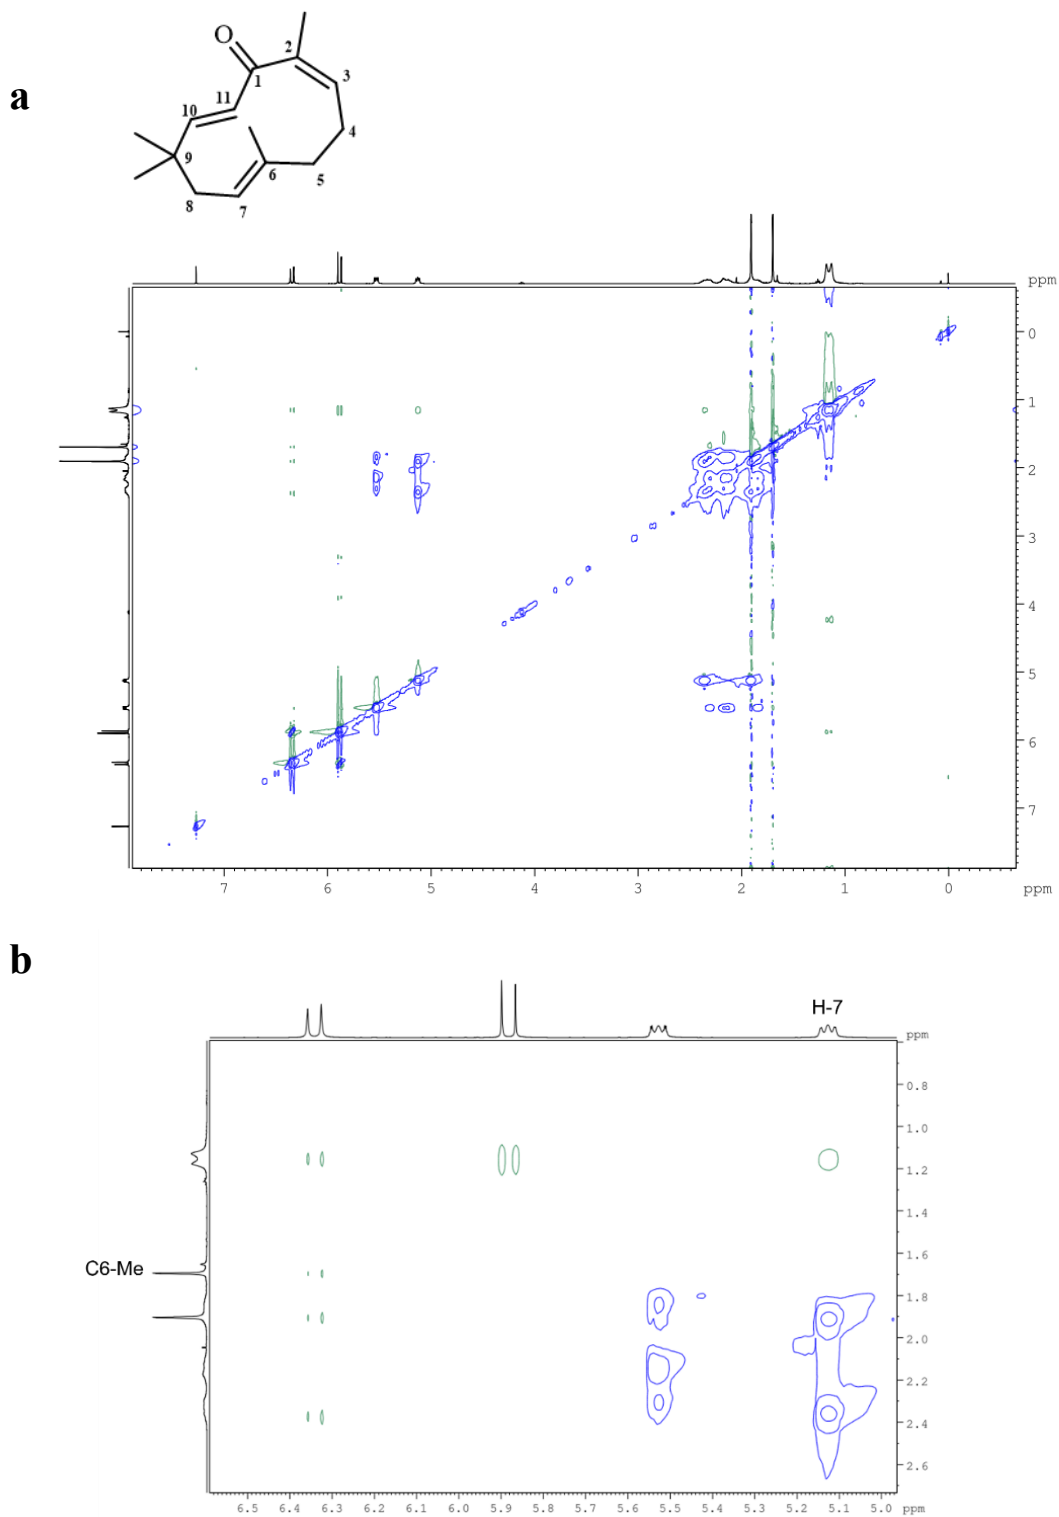

**Figure S8.** ROESY of **4** (CDCl<sub>3</sub>, 500 MHz): the overview (a) and the magnified view (b). The positive and negative signals were colored blue and green, respectively. No cross peak between H-7 and C6-Me was observed.

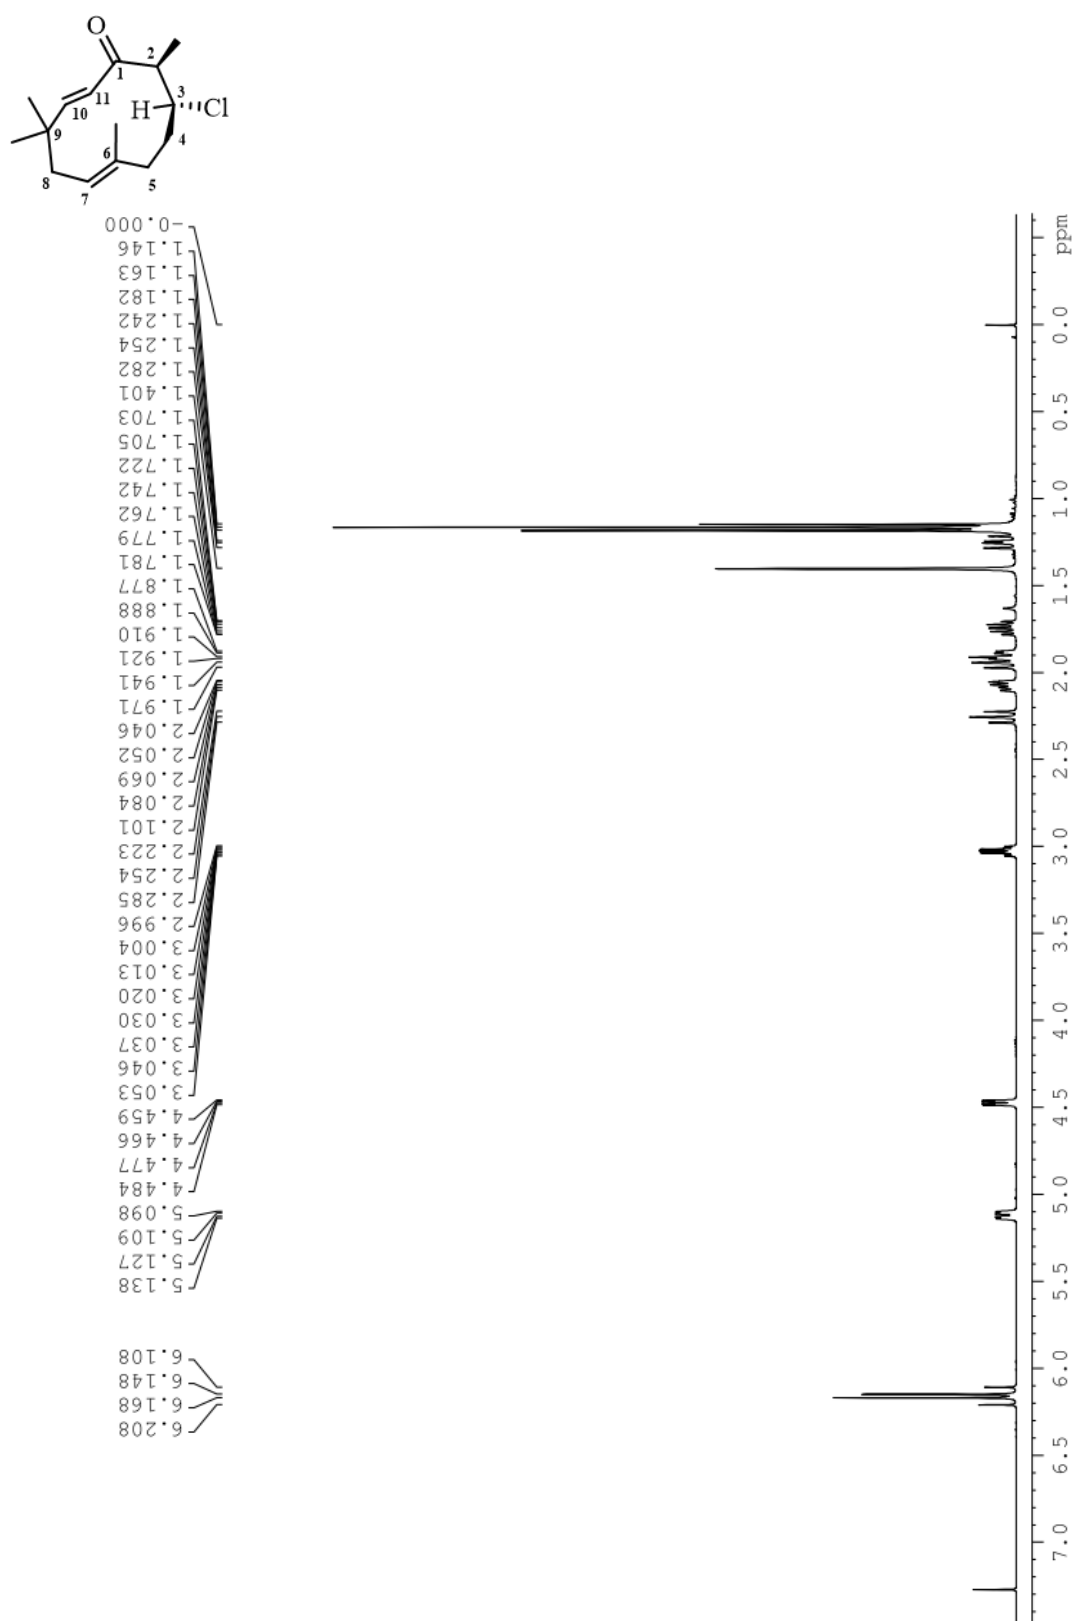

**Figure S9.**  $^1\text{H}$  NMR spectrum of **5** ( $\text{CDCl}_3$ , 400 MHz).

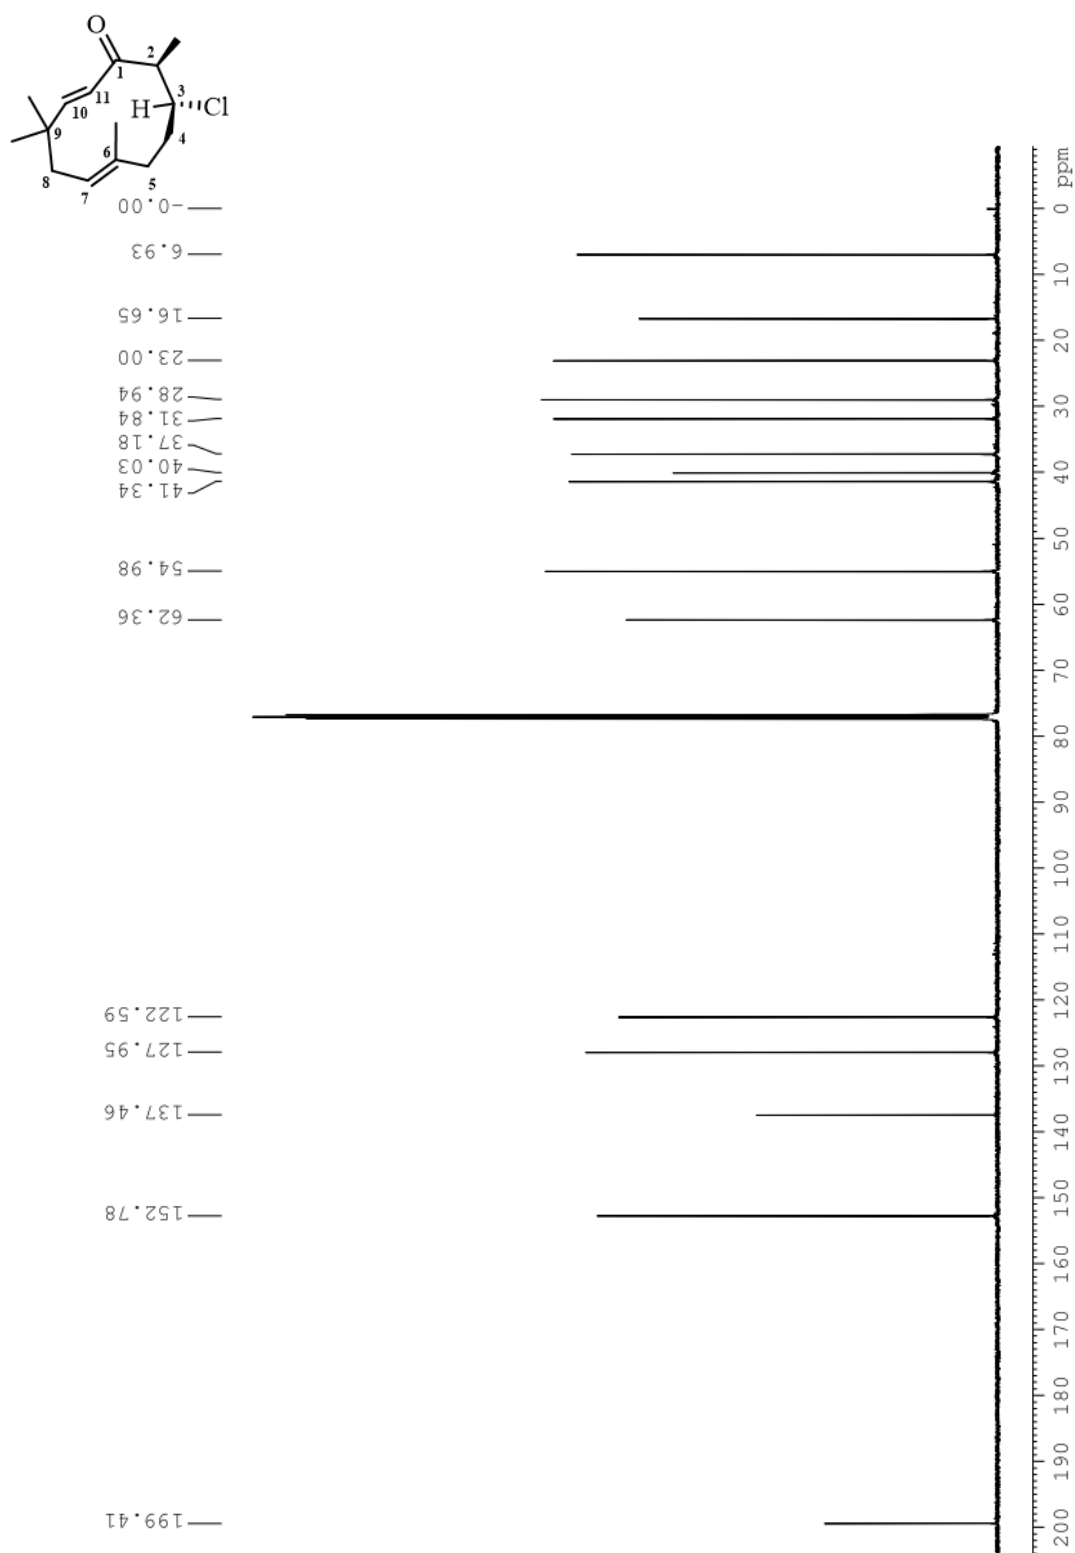

**Figure S10.**  $^{13}\text{C}\{^1\text{H}\}$  NMR spectrum of **5** ( $\text{CDCl}_3$ , 100 MHz).

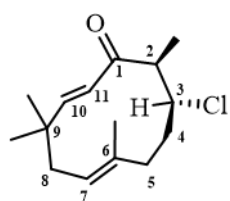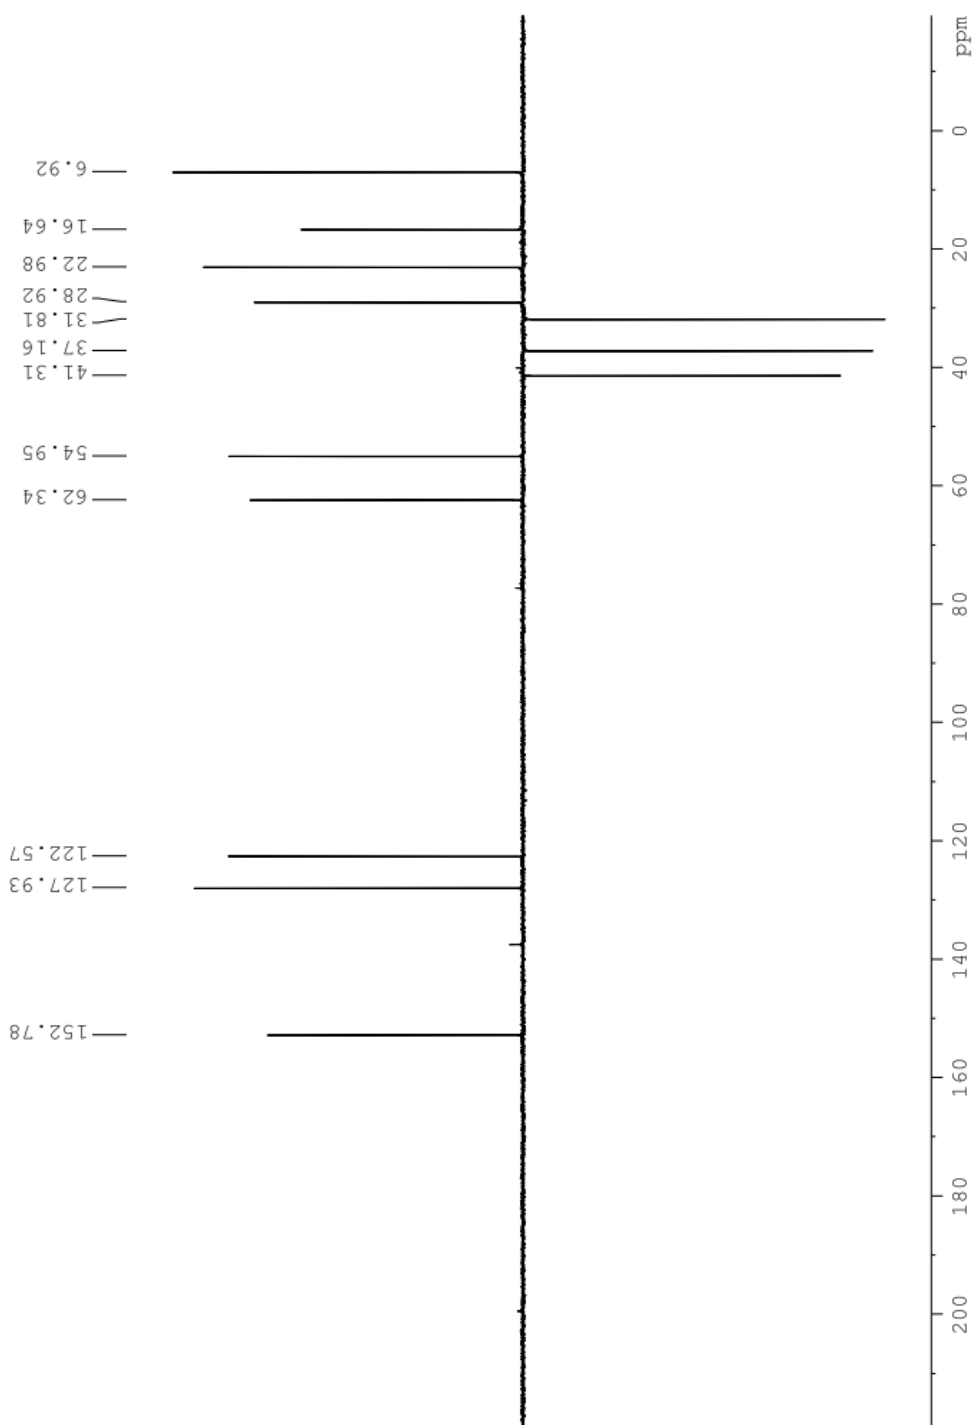

**Figure S11.** DEPT-135 spectrum of **5** ( $\text{CDCl}_3$ , 100 MHz).



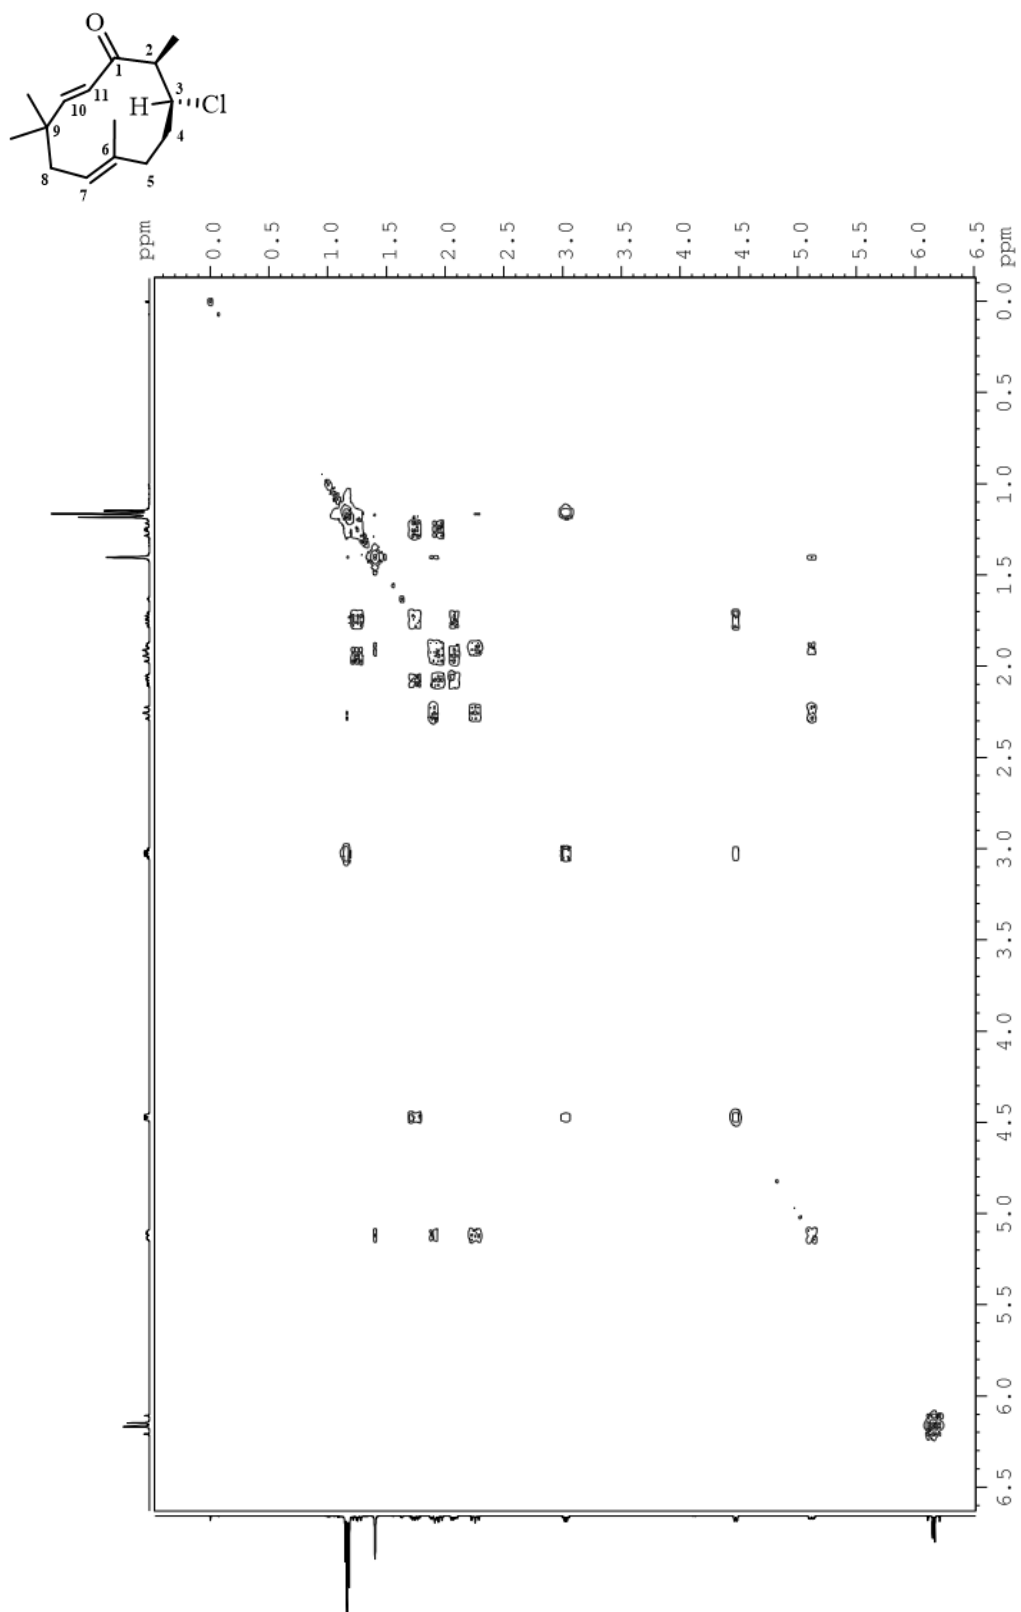

**Figure S12.**  $^1\text{H}$ - $^1\text{H}$  COSY of **5** ( $\text{CDCl}_3$ , 400 MHz).

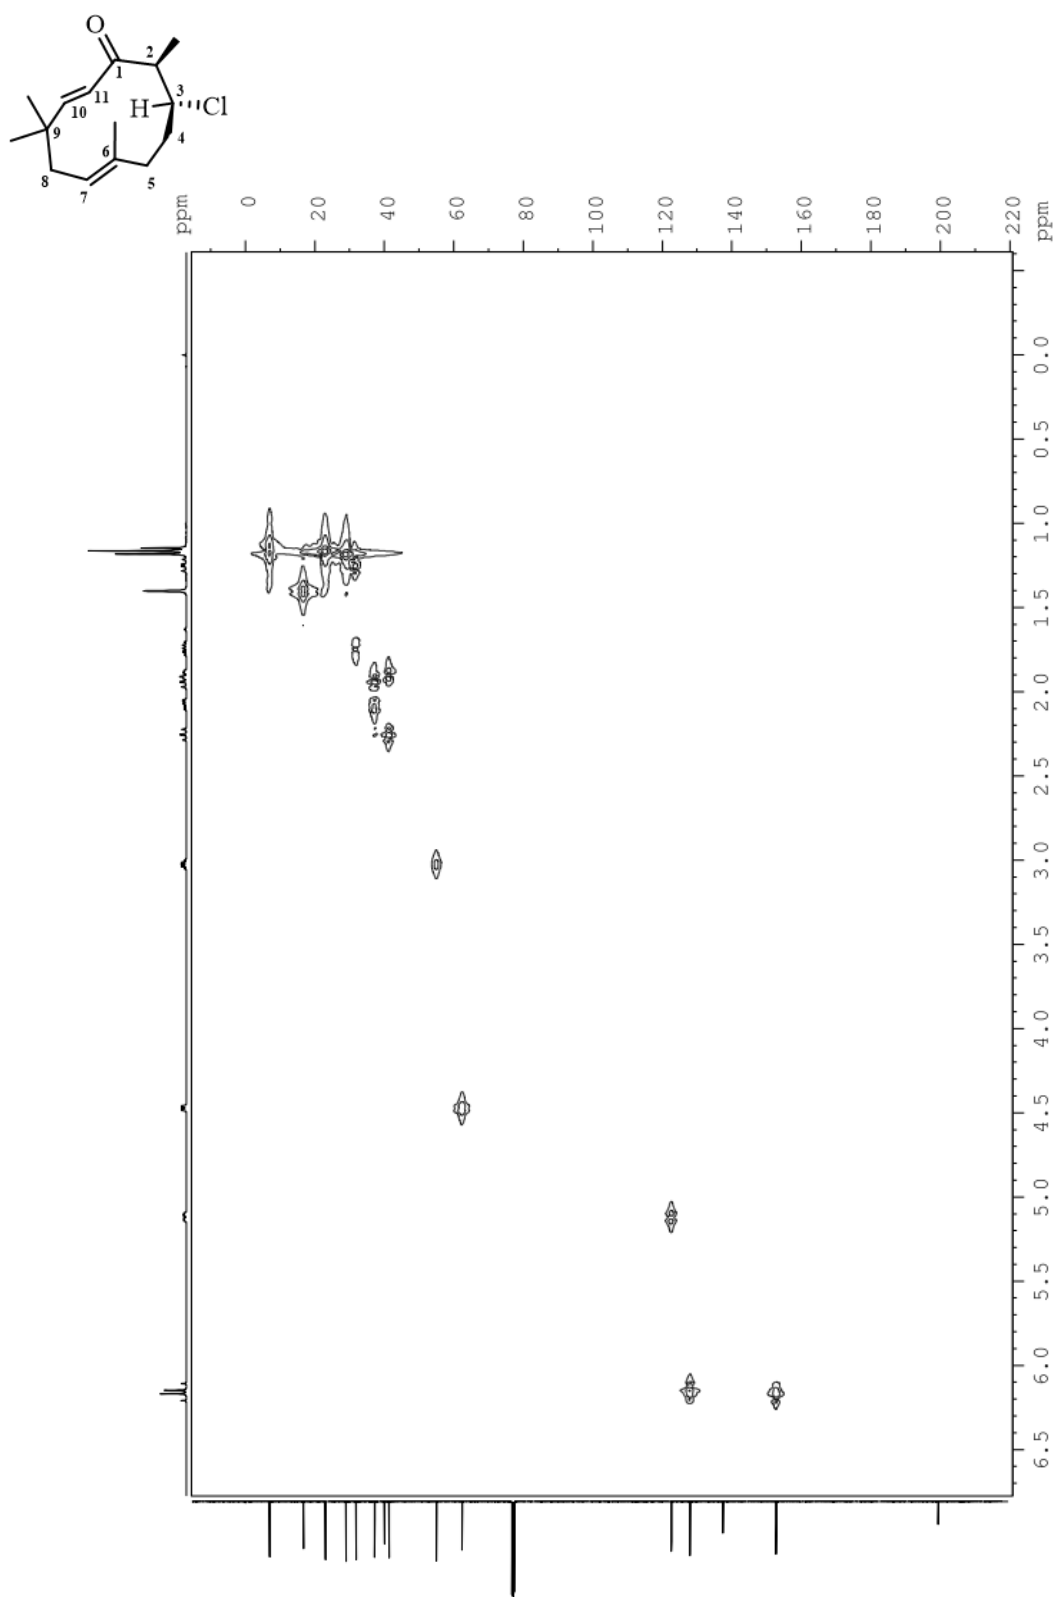

**Figure S13.**  $^1\text{H}$ - $^{13}\text{C}$  HMQC of **5** ( $\text{CDCl}_3$ , 400 MHz).

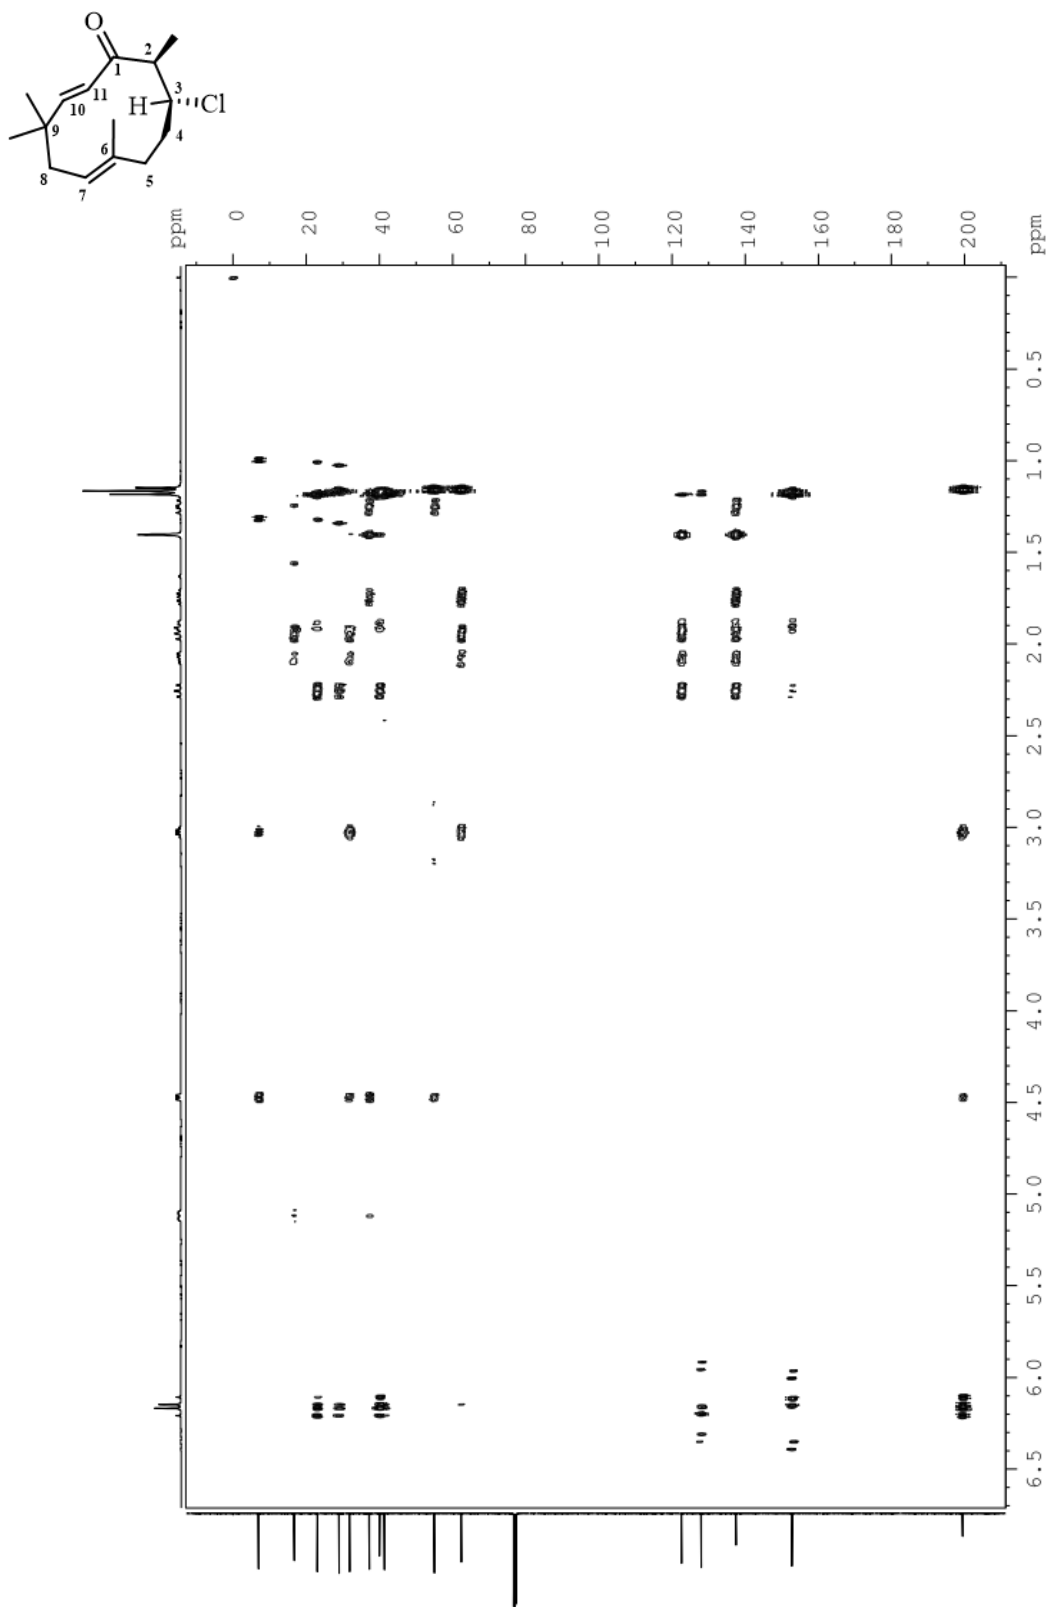

**Figure S14.**  $^1\text{H}$ - $^{13}\text{C}$  HMBC of **5** ( $\text{CDCl}_3$ , 400 MHz).

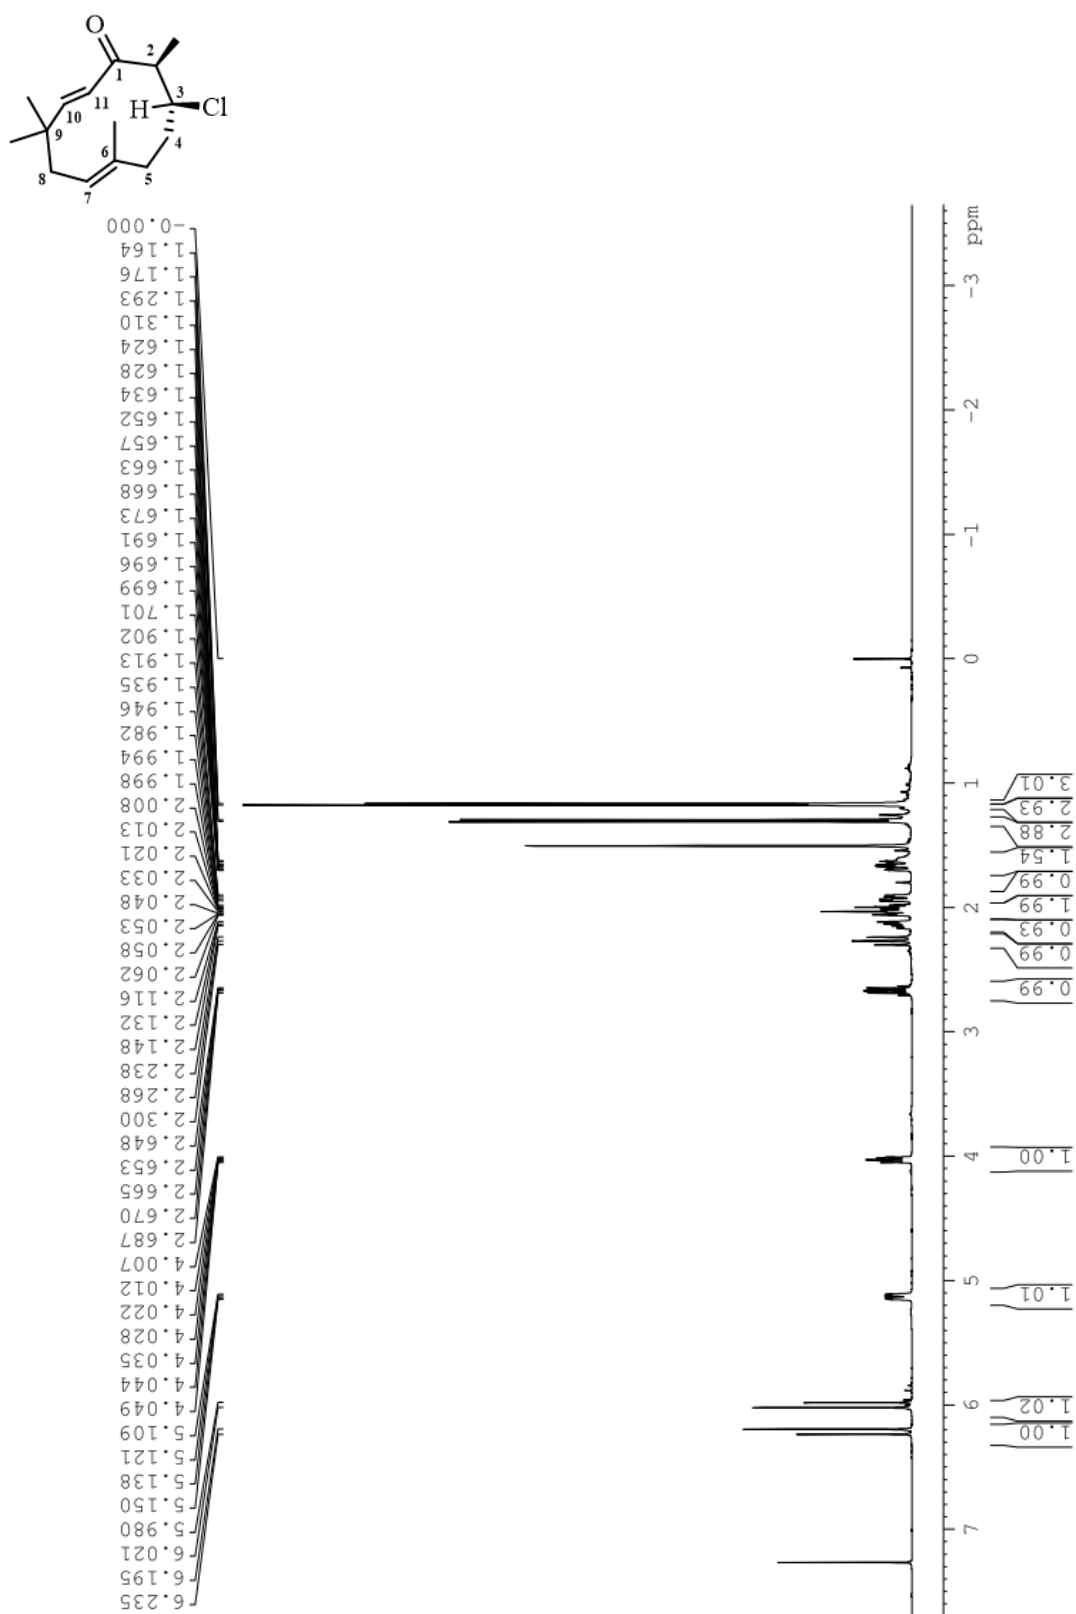

**Figure S15.**  $^1\text{H}$  NMR spectrum of **6** (CDCl<sub>3</sub>, 400 MHz).

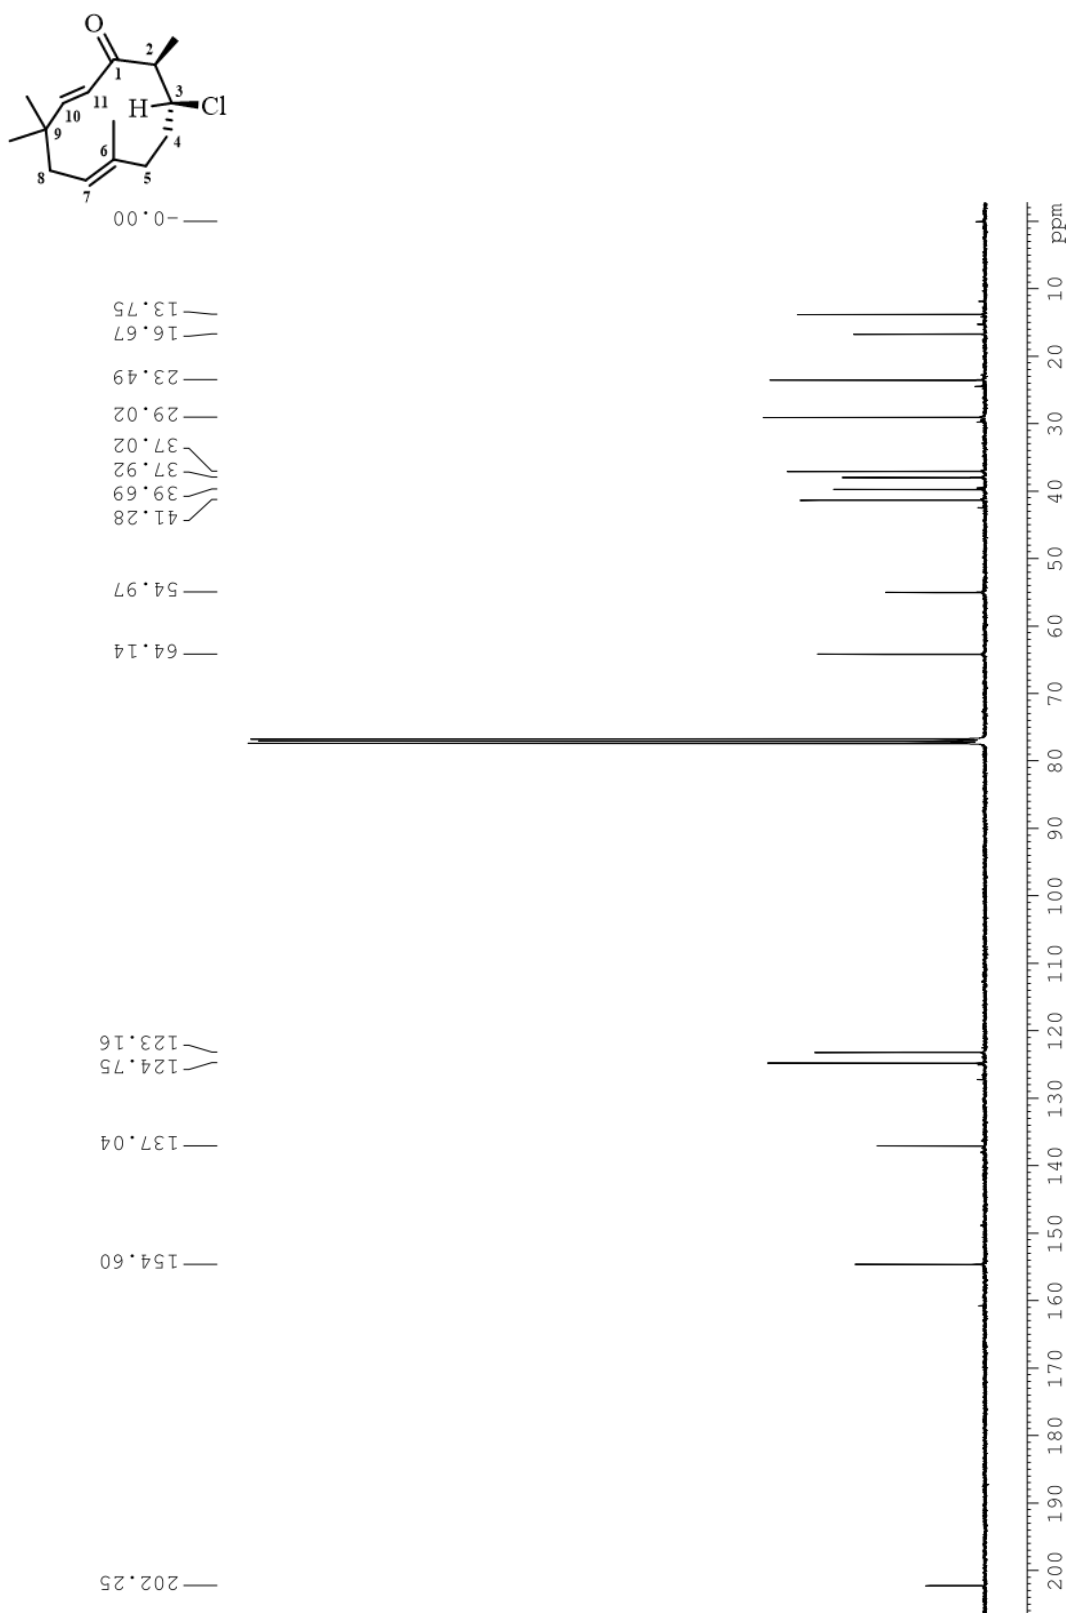

**Figure S16.**  $^{13}\text{C}\{^1\text{H}\}$  NMR spectrum of **6** ( $\text{CDCl}_3$ , 100 MHz).

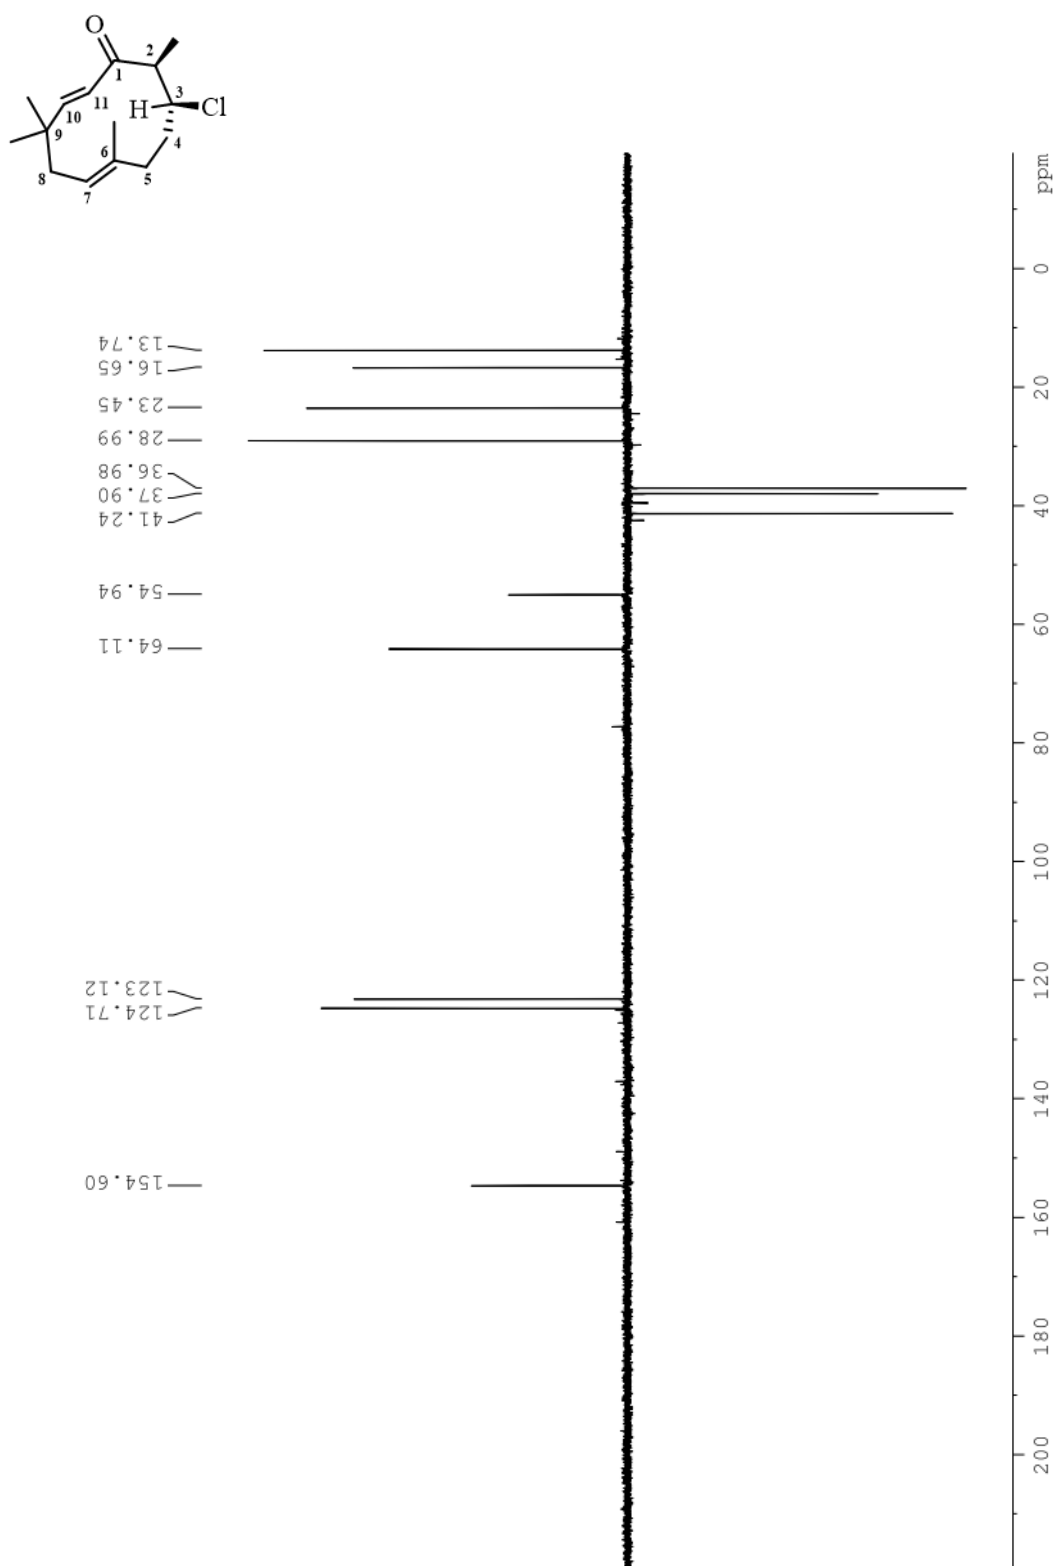

**Figure S17.** DEPT-135 spectrum of **6** (CDCl<sub>3</sub>, 100 MHz).

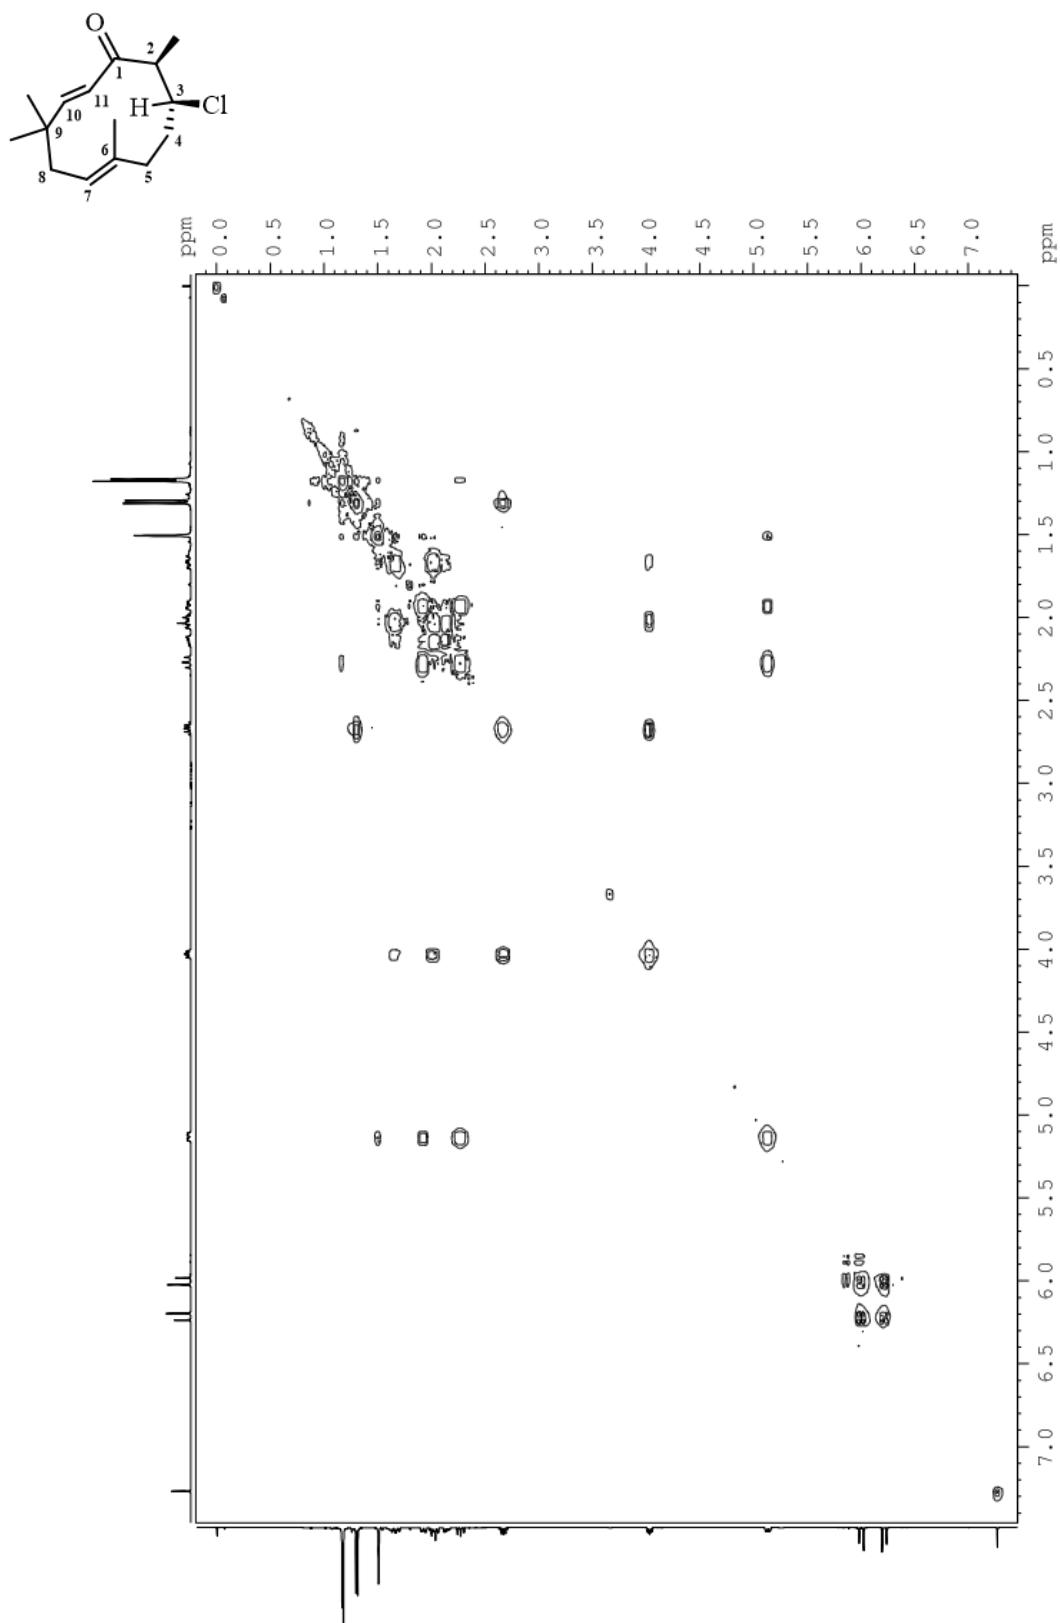

**Figure S18.**  $^1\text{H}$ - $^1\text{H}$  COSY of **6** ( $\text{CDCl}_3$ , 400 MHz).

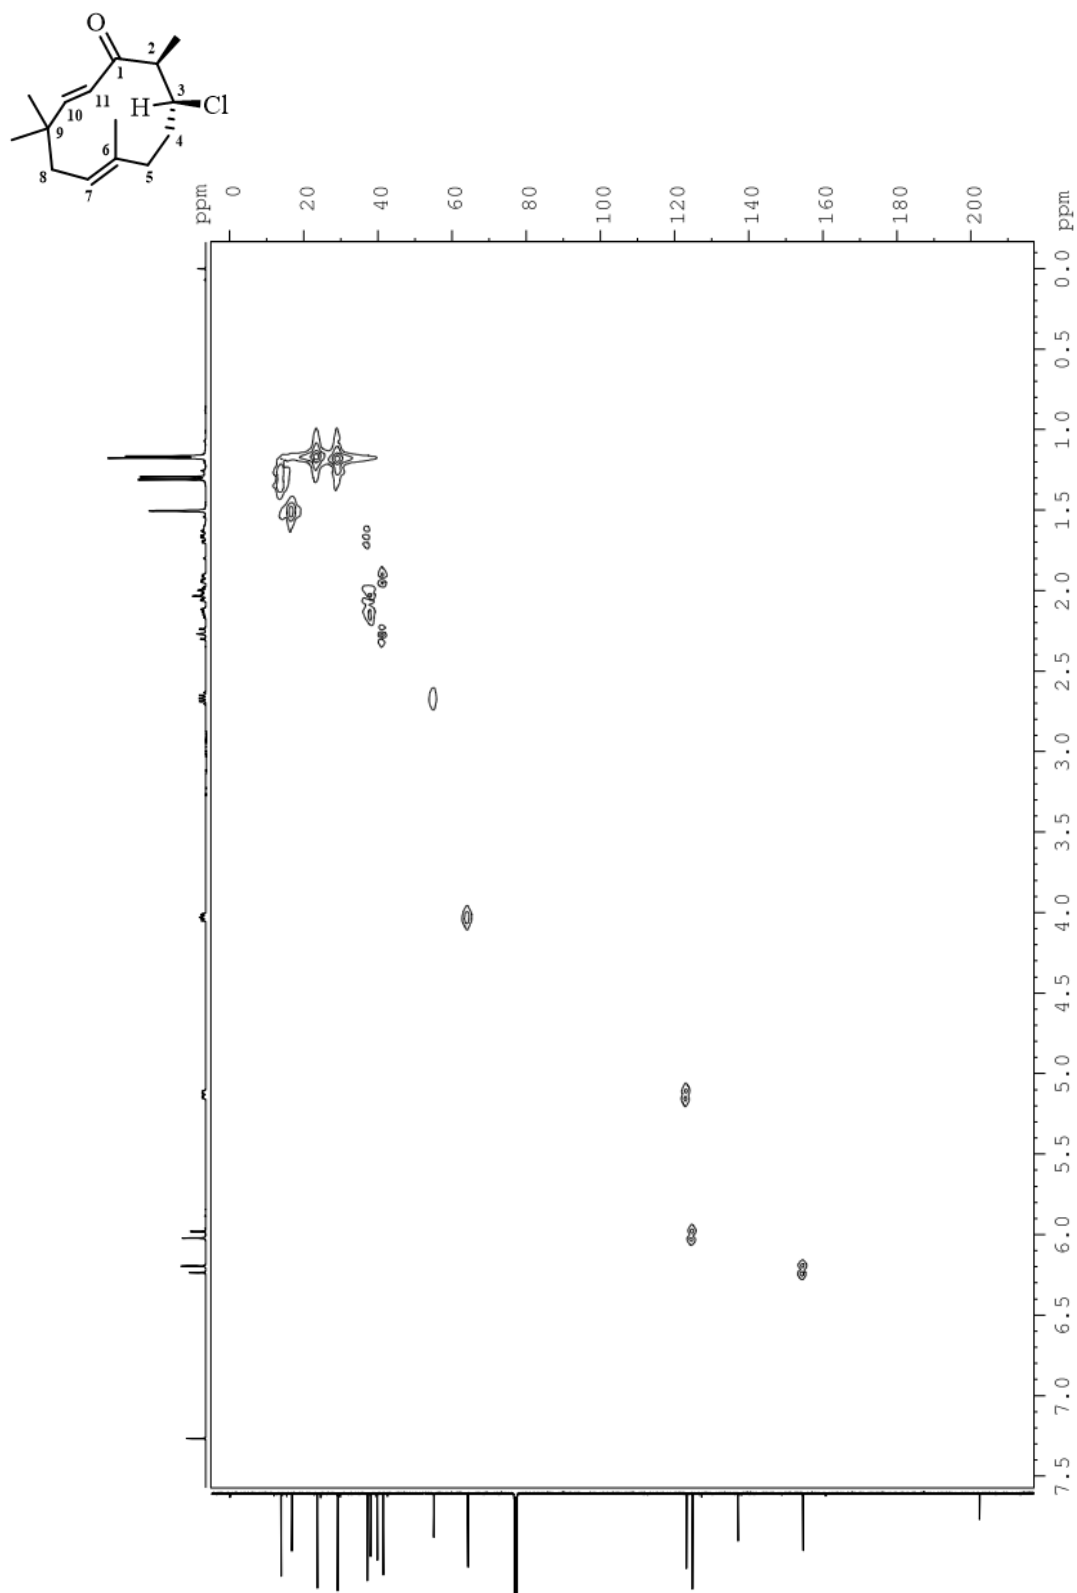

**Figure S19.**  $^1\text{H}$ - $^{13}\text{C}$  HMQC of **6** ( $\text{CDCl}_3$ , 400 MHz).



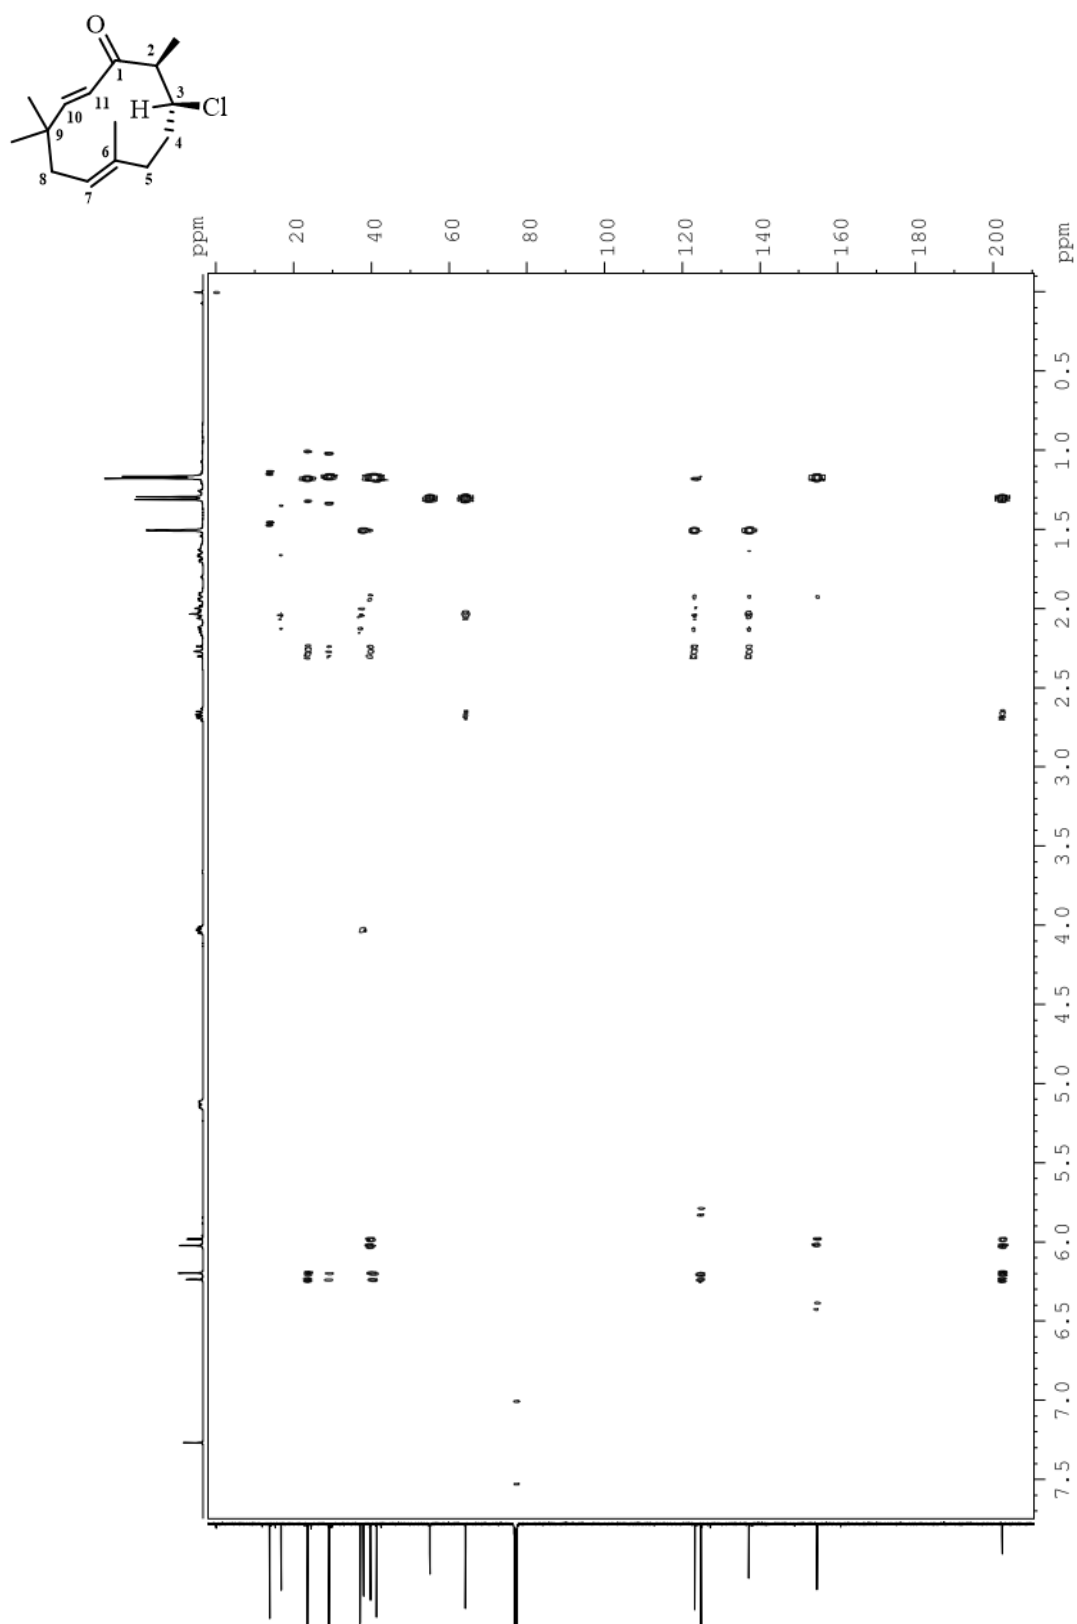

**Figure S20.**  $^1\text{H}$ - $^{13}\text{C}$  HMBC of **6** ( $\text{CDCl}_3$ , 400 MHz).

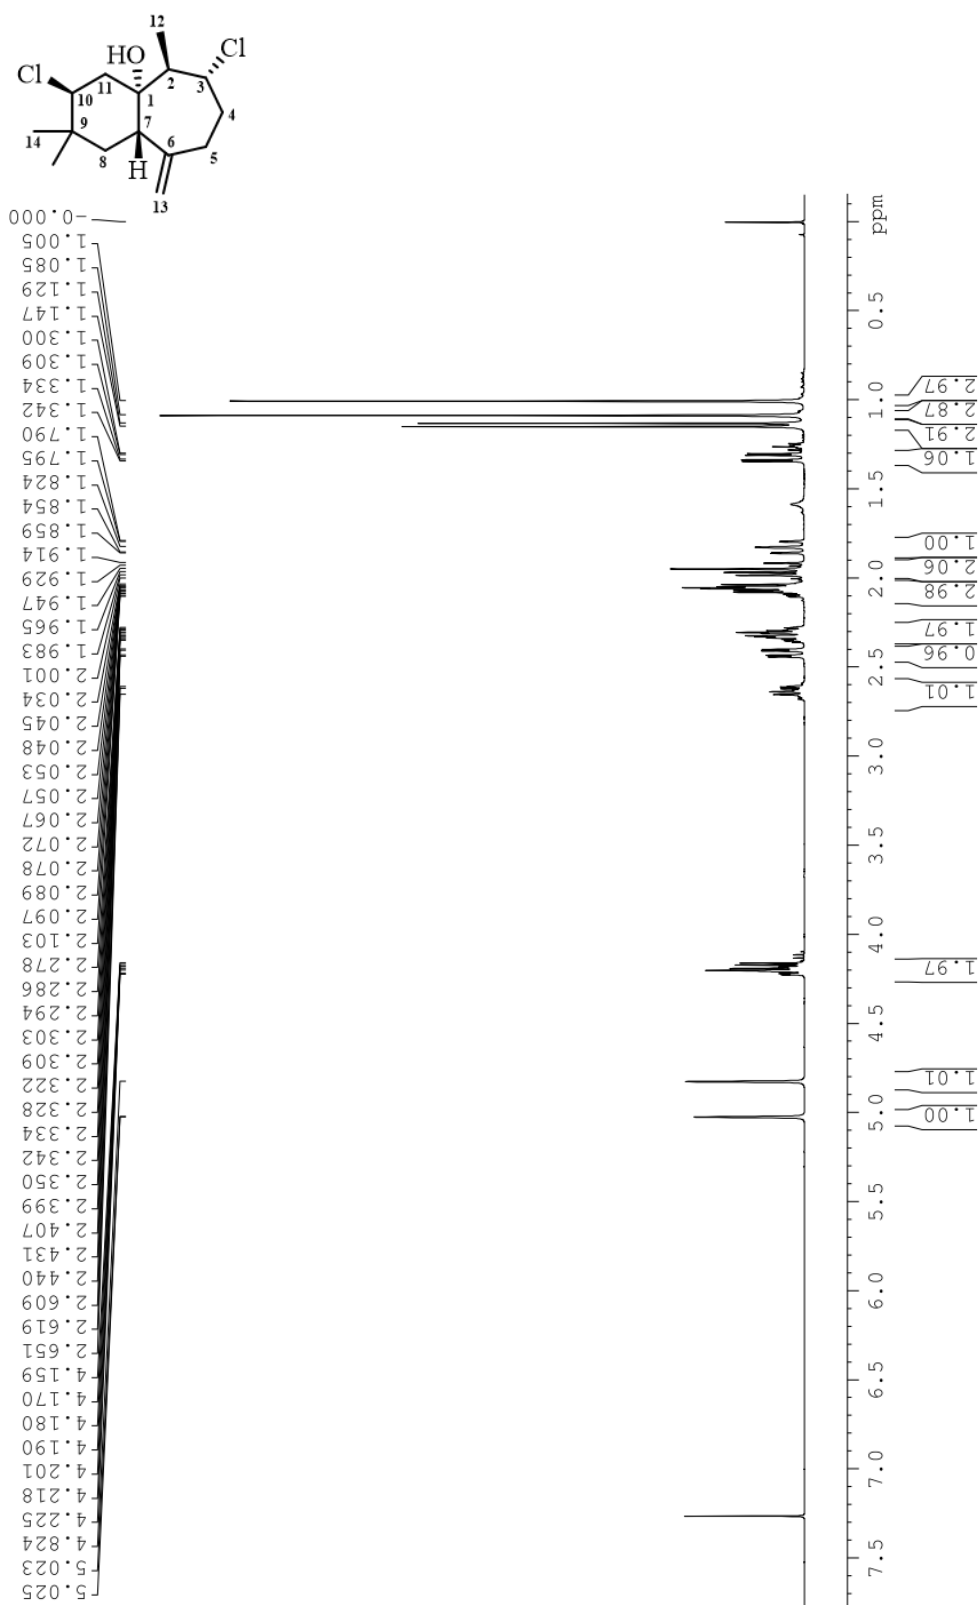

**Figure S21.**  $^1\text{H}$  NMR spectrum of 7 (CDCl<sub>3</sub>, 400 MHz).

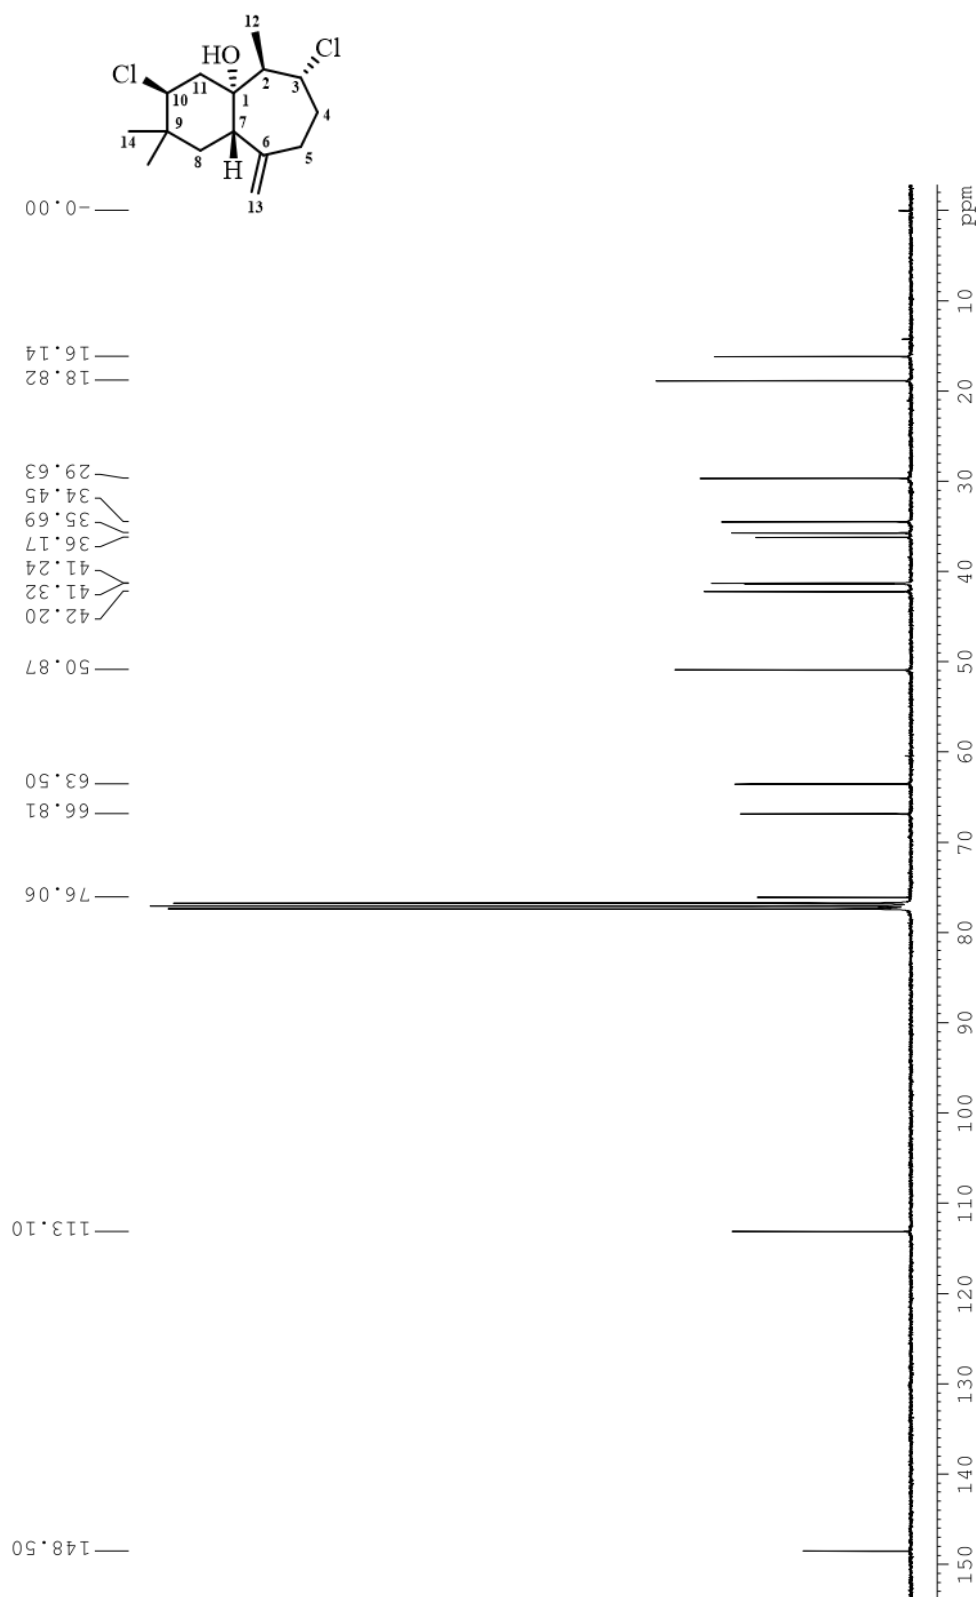

**Figure S22.**  $^{13}\text{C}\{^1\text{H}\}$  NMR spectrum of 7 ( $\text{CDCl}_3$ , 100 MHz).

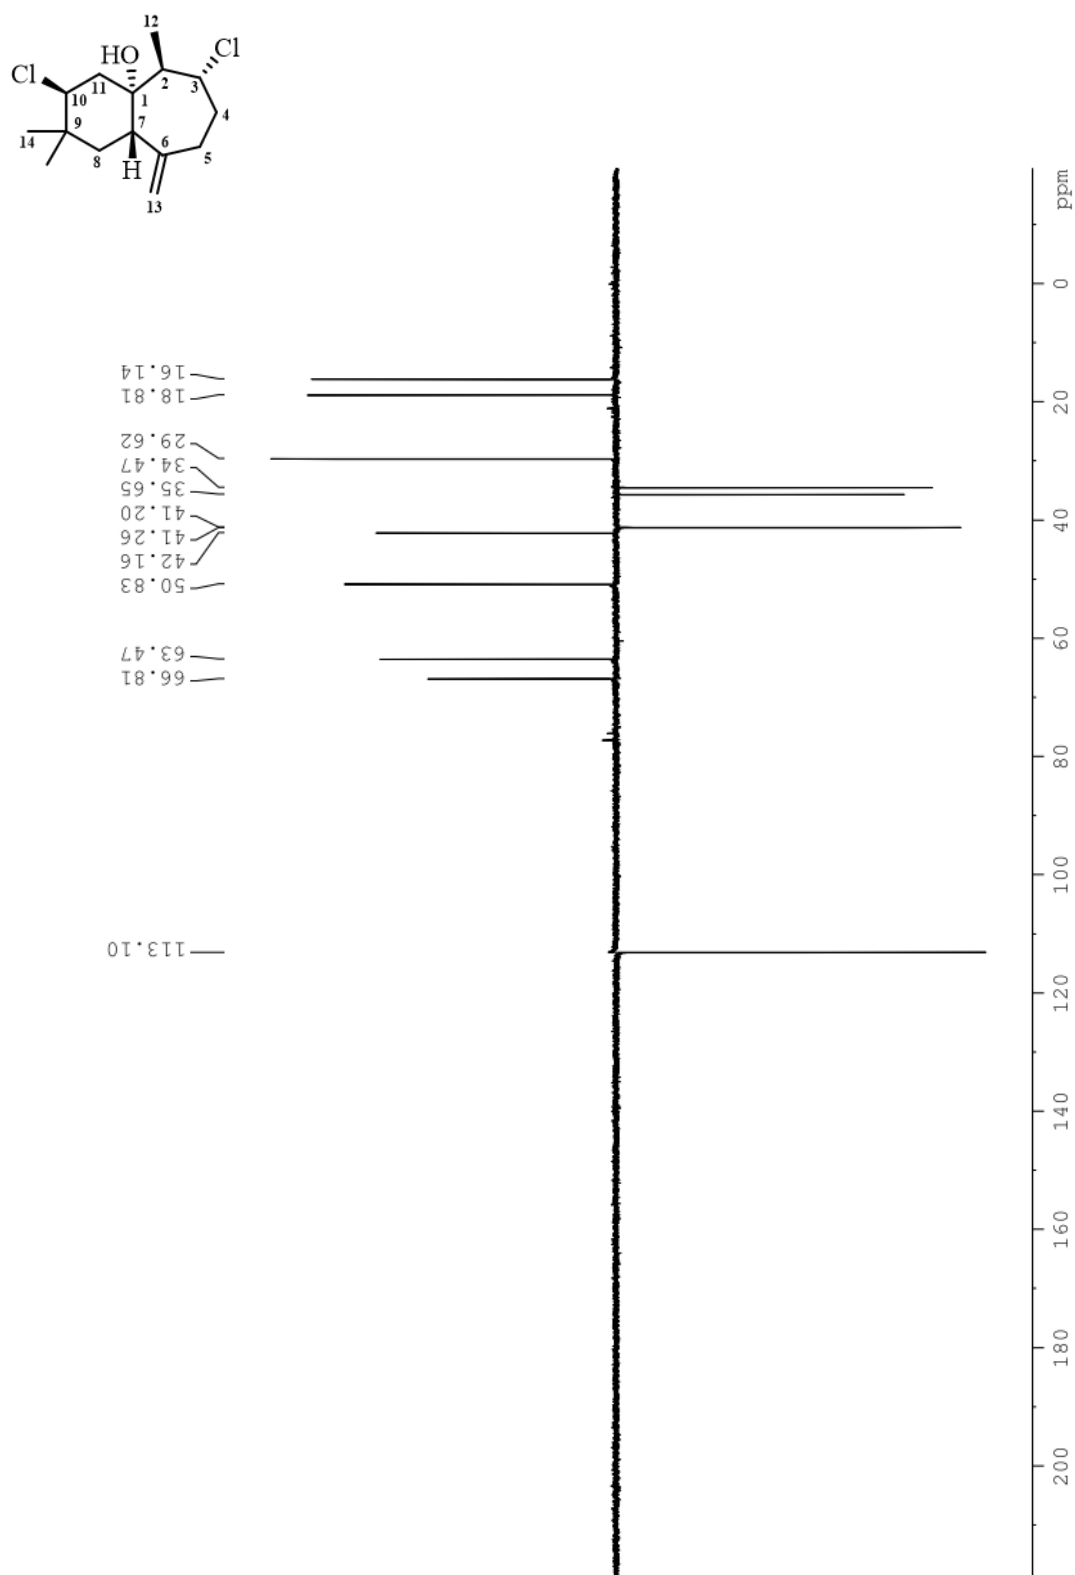

**Figure S23.** DEPT-135 spectrum of **7** ( $\text{CDCl}_3$ , 100 MHz).

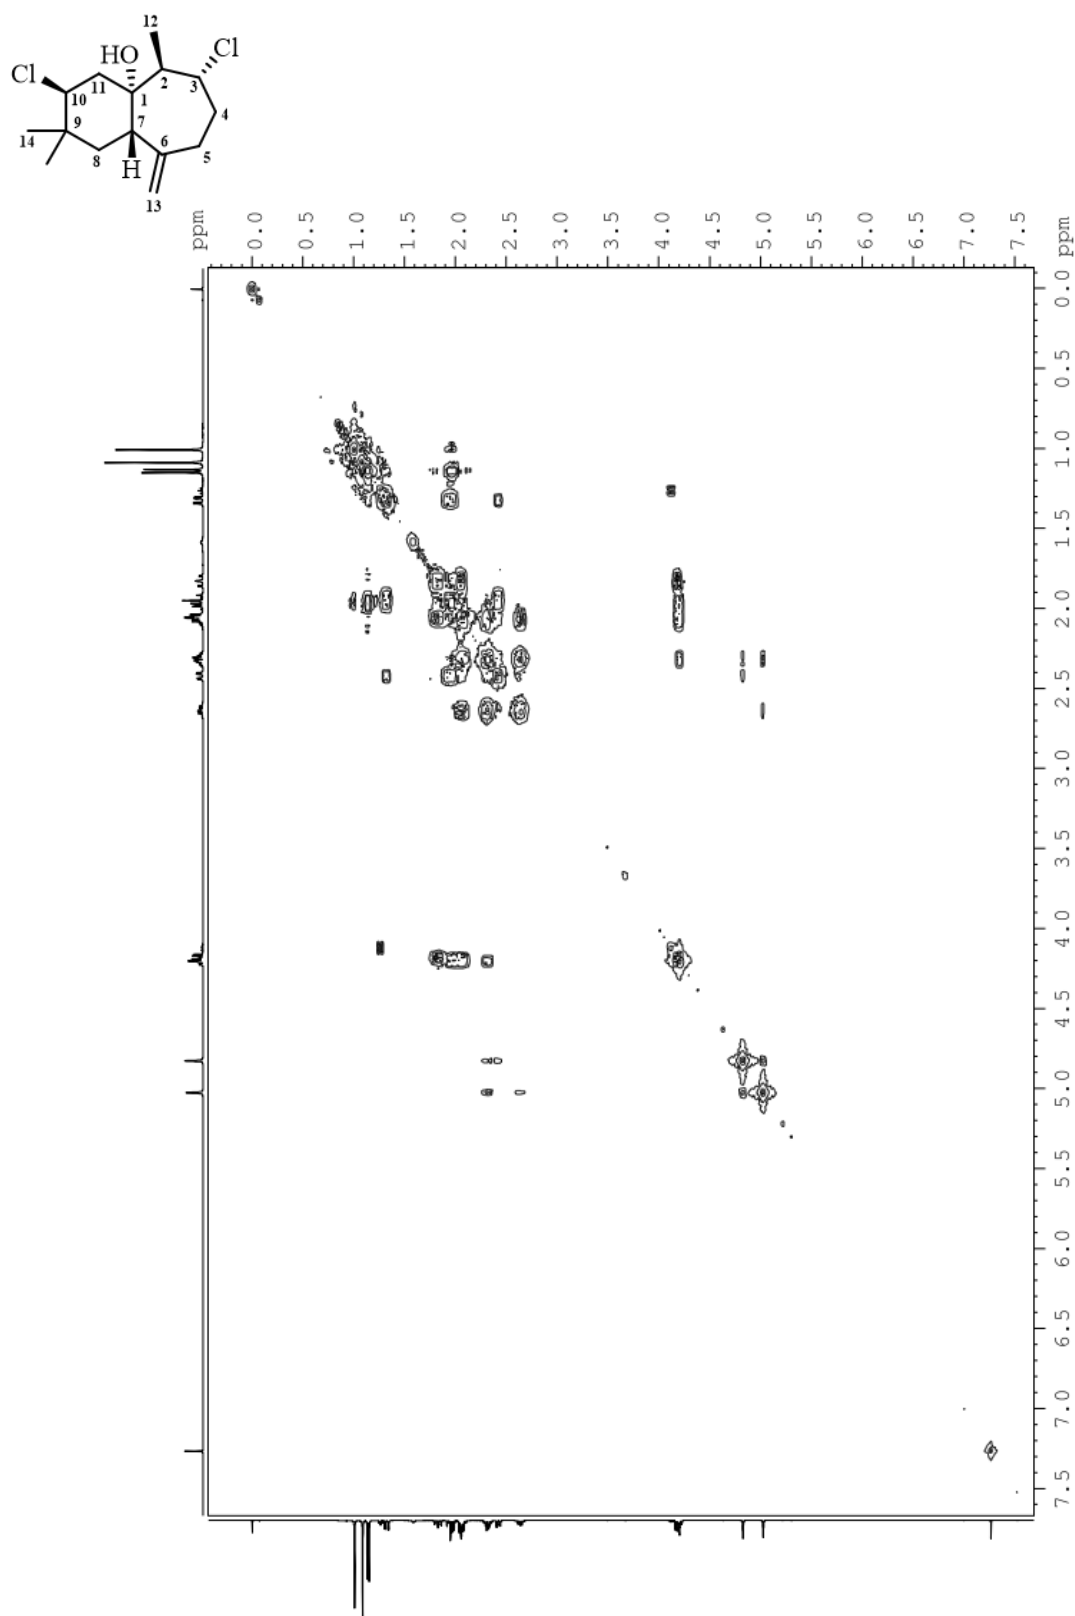

**Figure S24.**  $^1\text{H}$ - $^1\text{H}$  COSY of 7 ( $\text{CDCl}_3$ , 400 MHz).

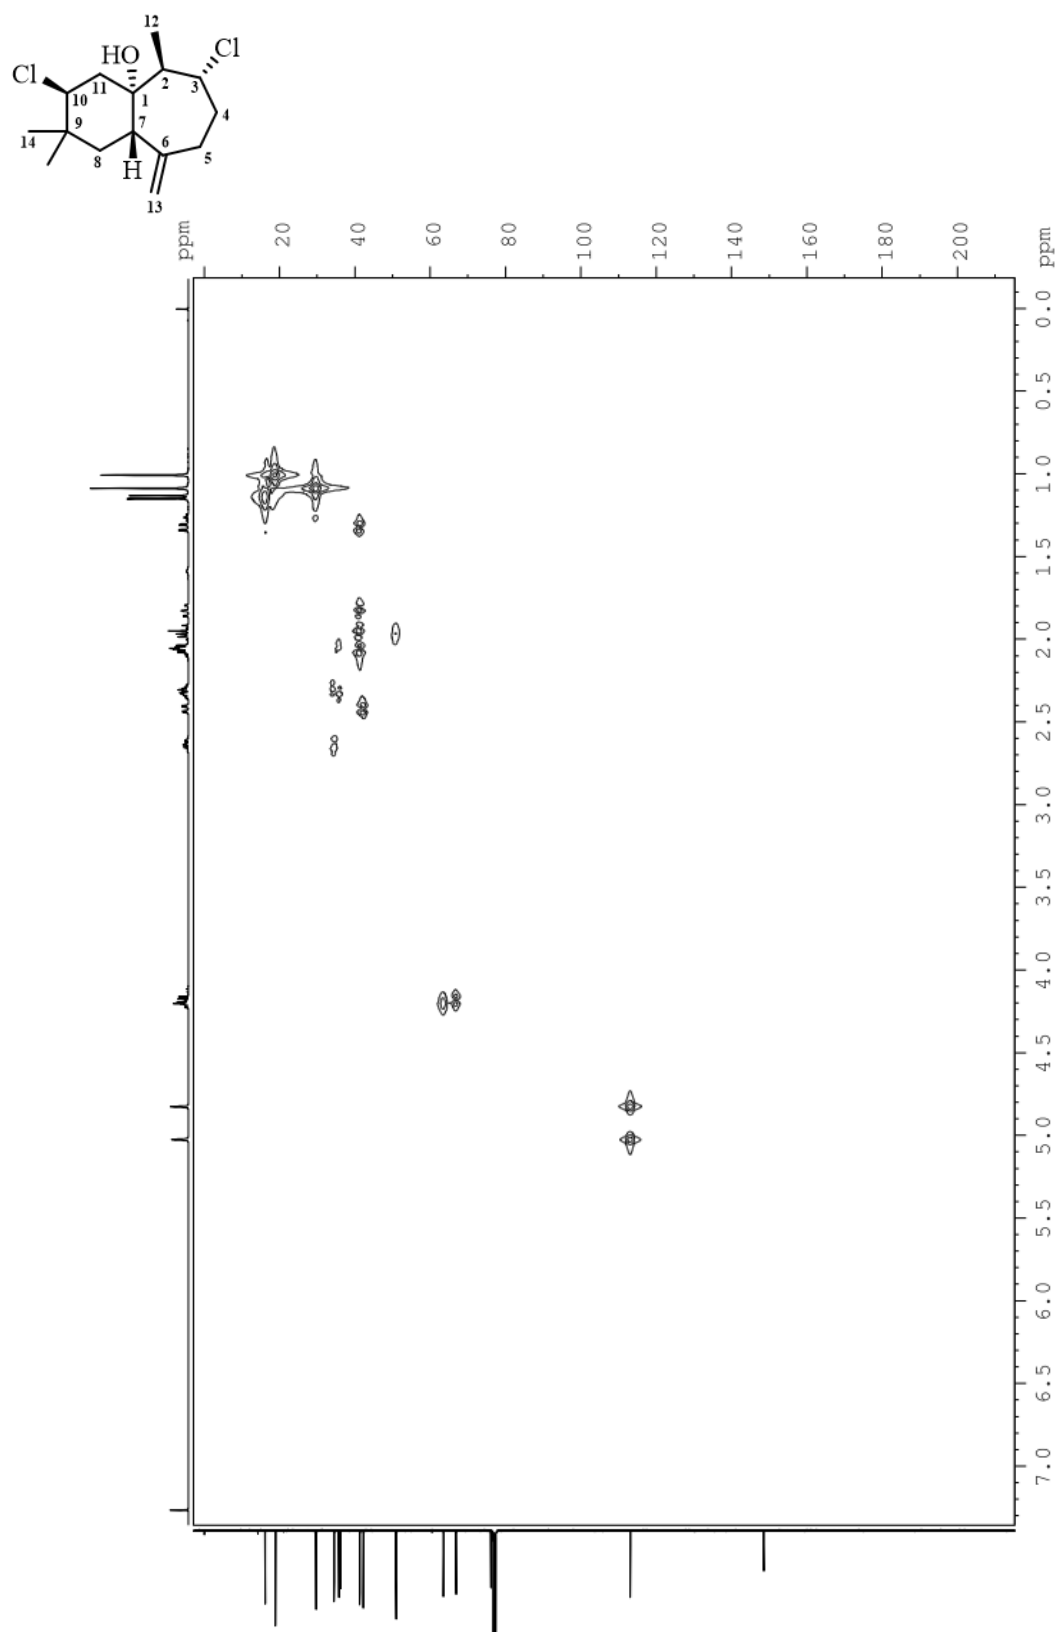

**Figure S25.**  $^1\text{H}$ - $^{13}\text{C}$  HMQC of 7 ( $\text{CDCl}_3$ , 400 MHz).

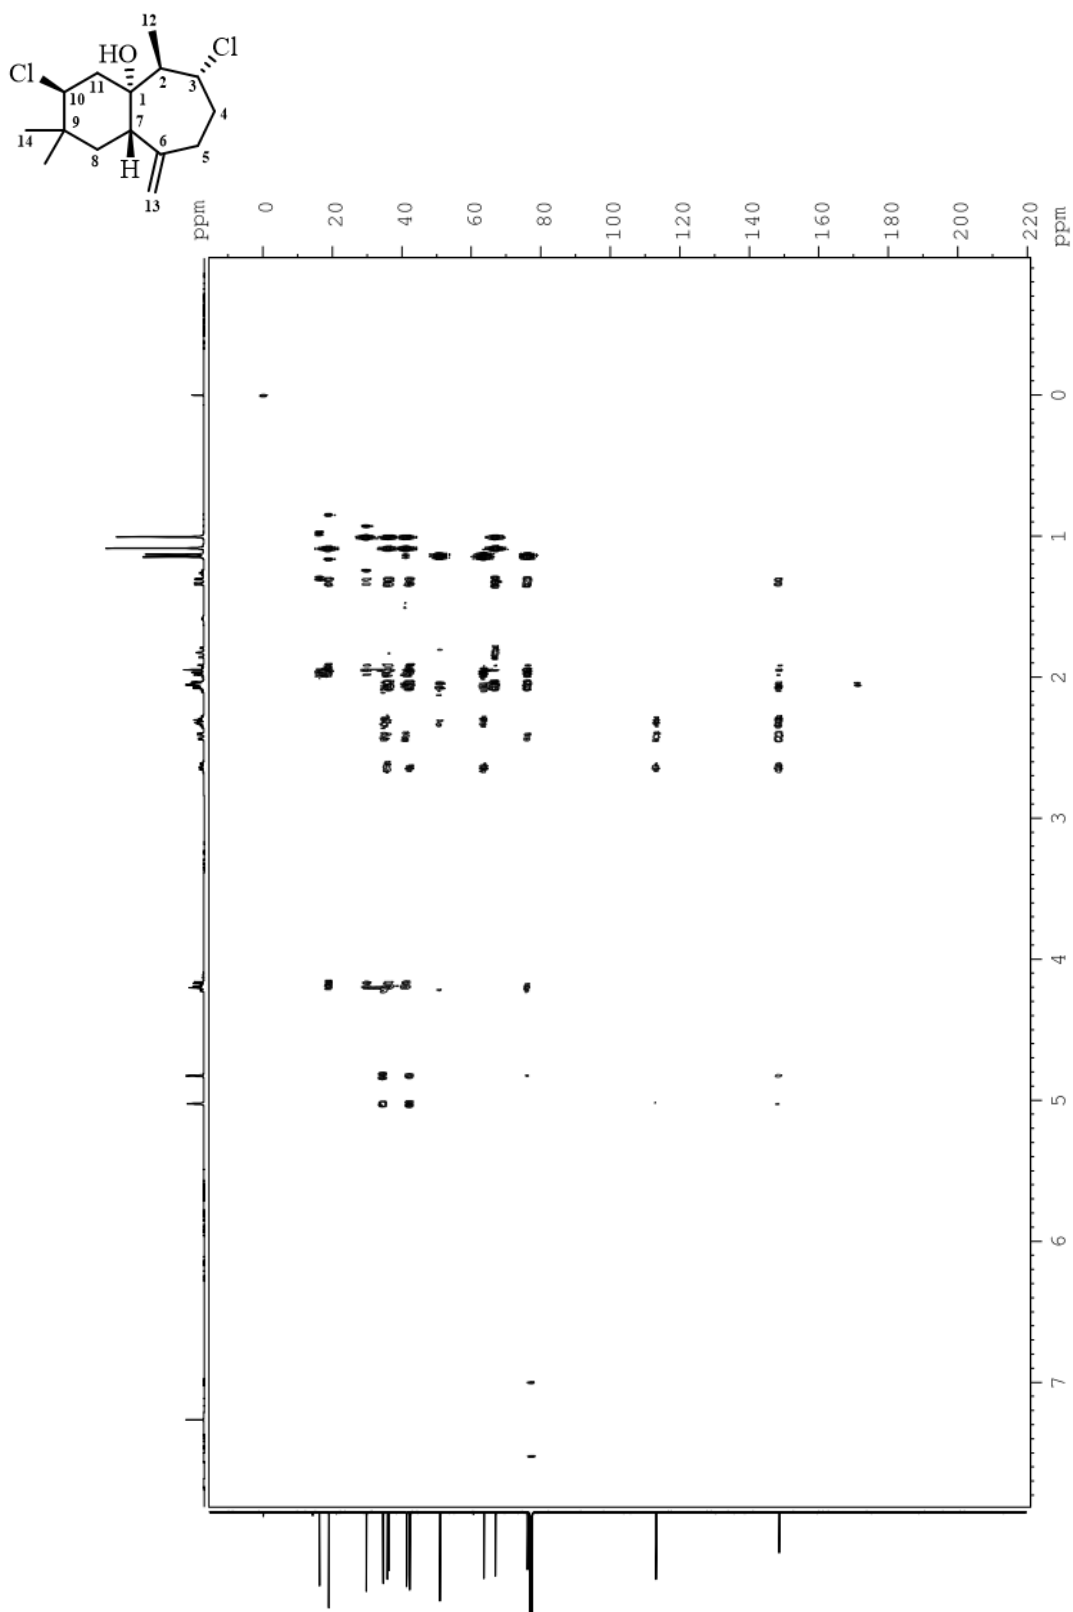

**Figure S26.**  $^1\text{H}$ - $^{13}\text{C}$  HMBC of 7 ( $\text{CDCl}_3$ , 400 MHz).

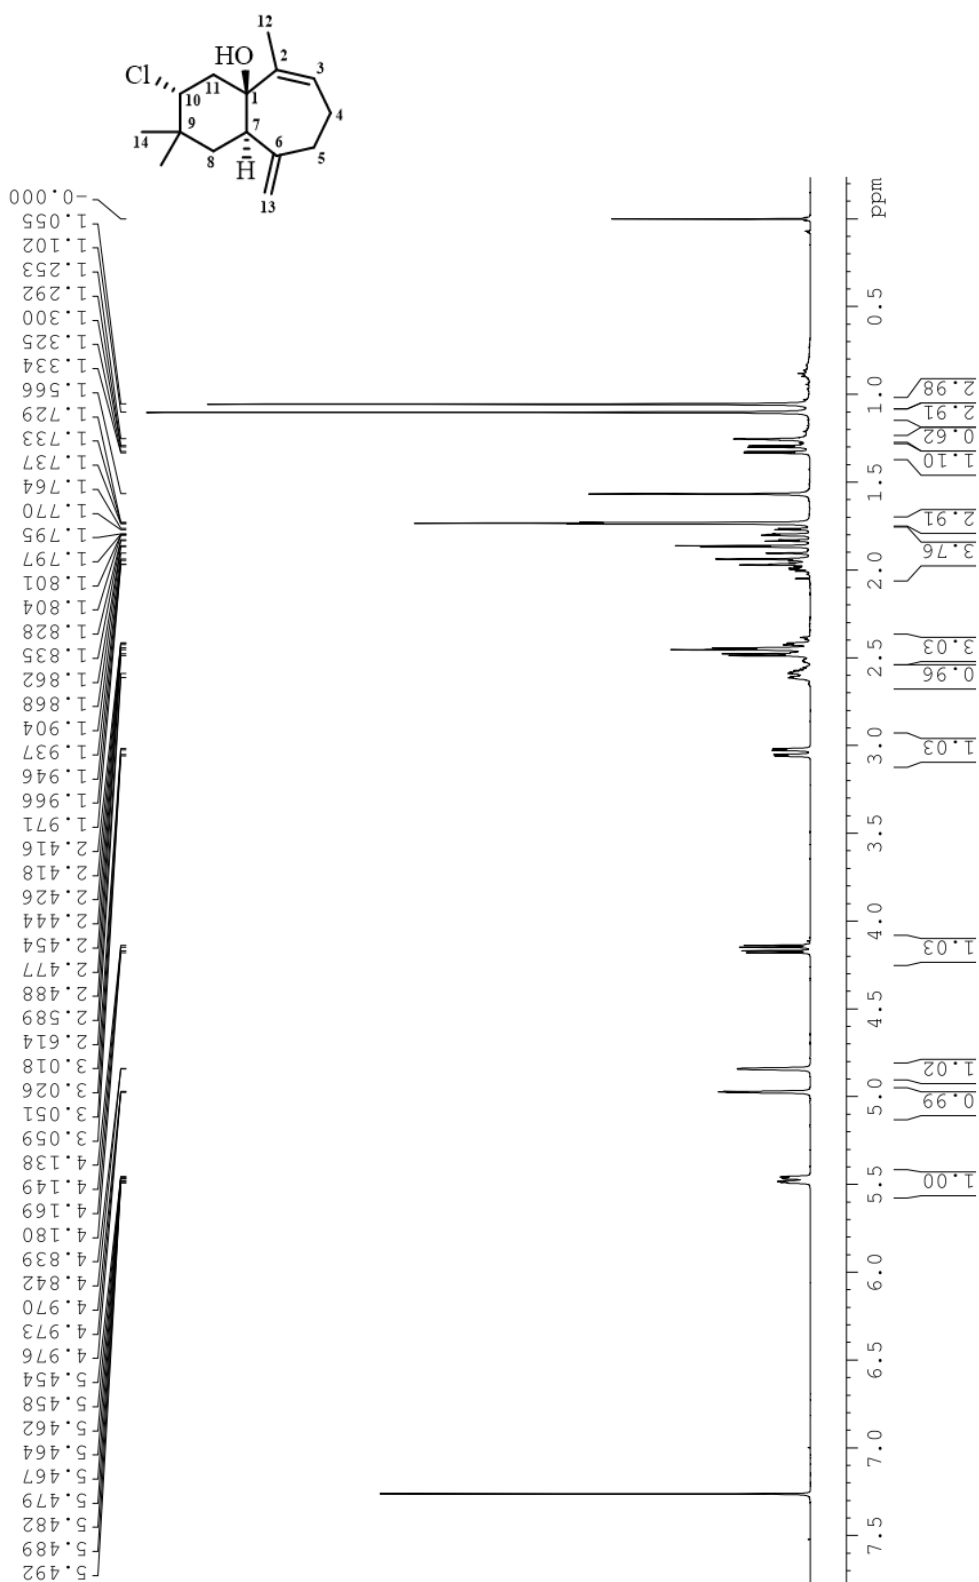

**Figure S27.** <sup>1</sup>H NMR spectrum of **8** (CDCl<sub>3</sub>, 400 MHz).



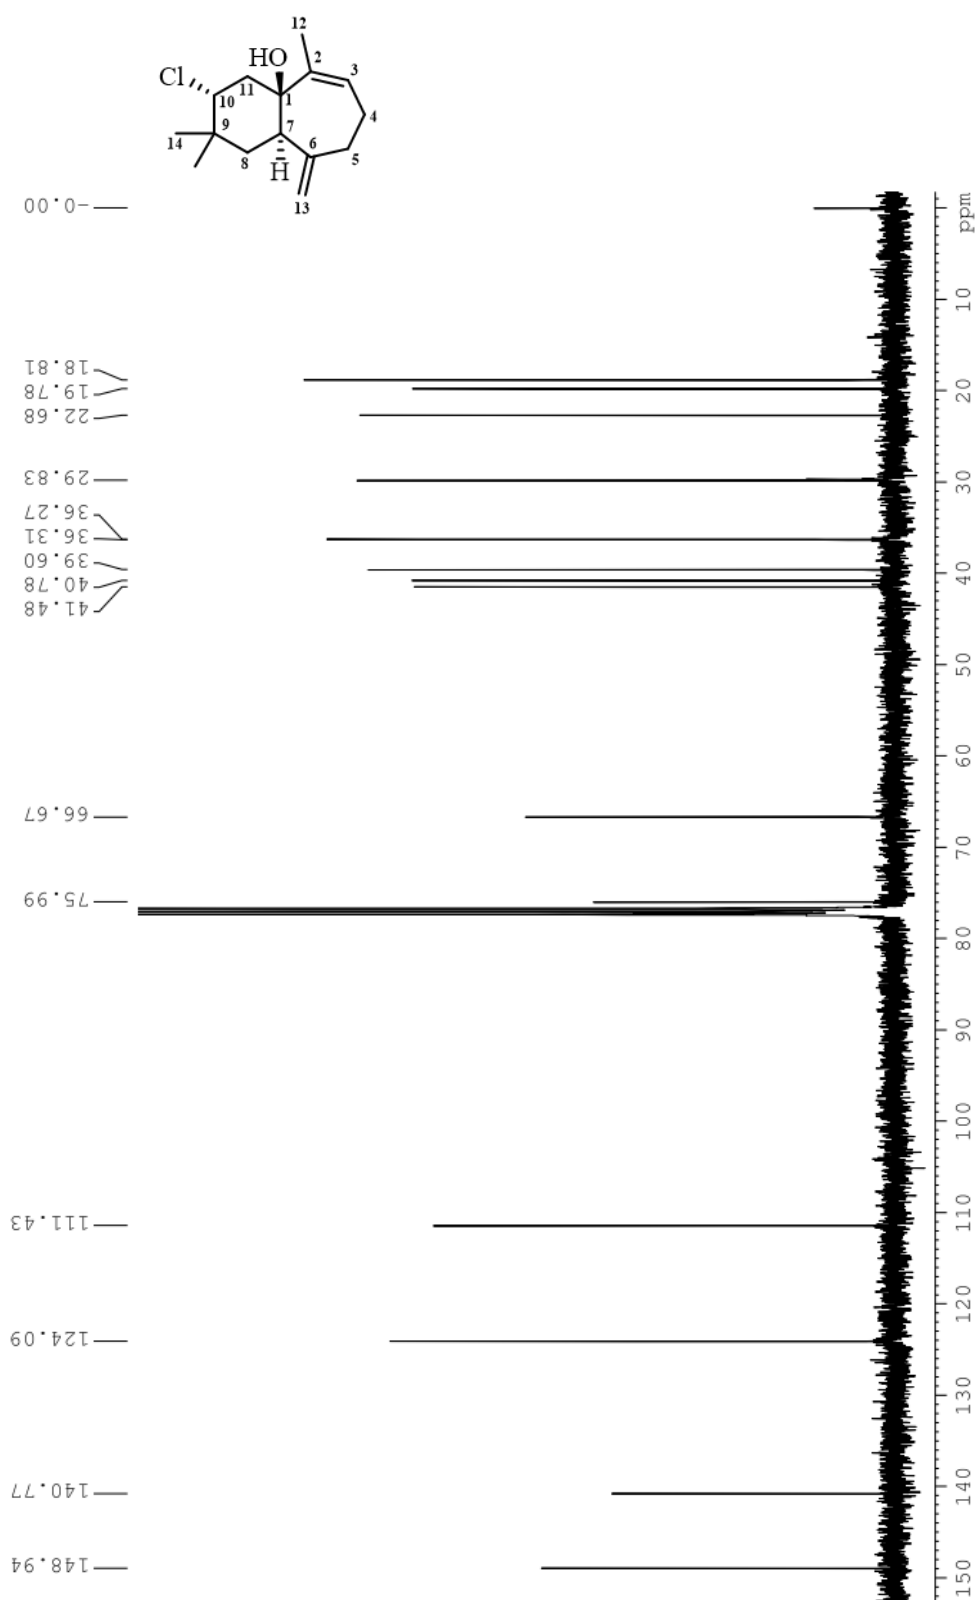

**Figure S28.**  $^{13}\text{C}\{^1\text{H}\}$  NMR spectrum of **8** (CDCl<sub>3</sub>, 100 MHz).

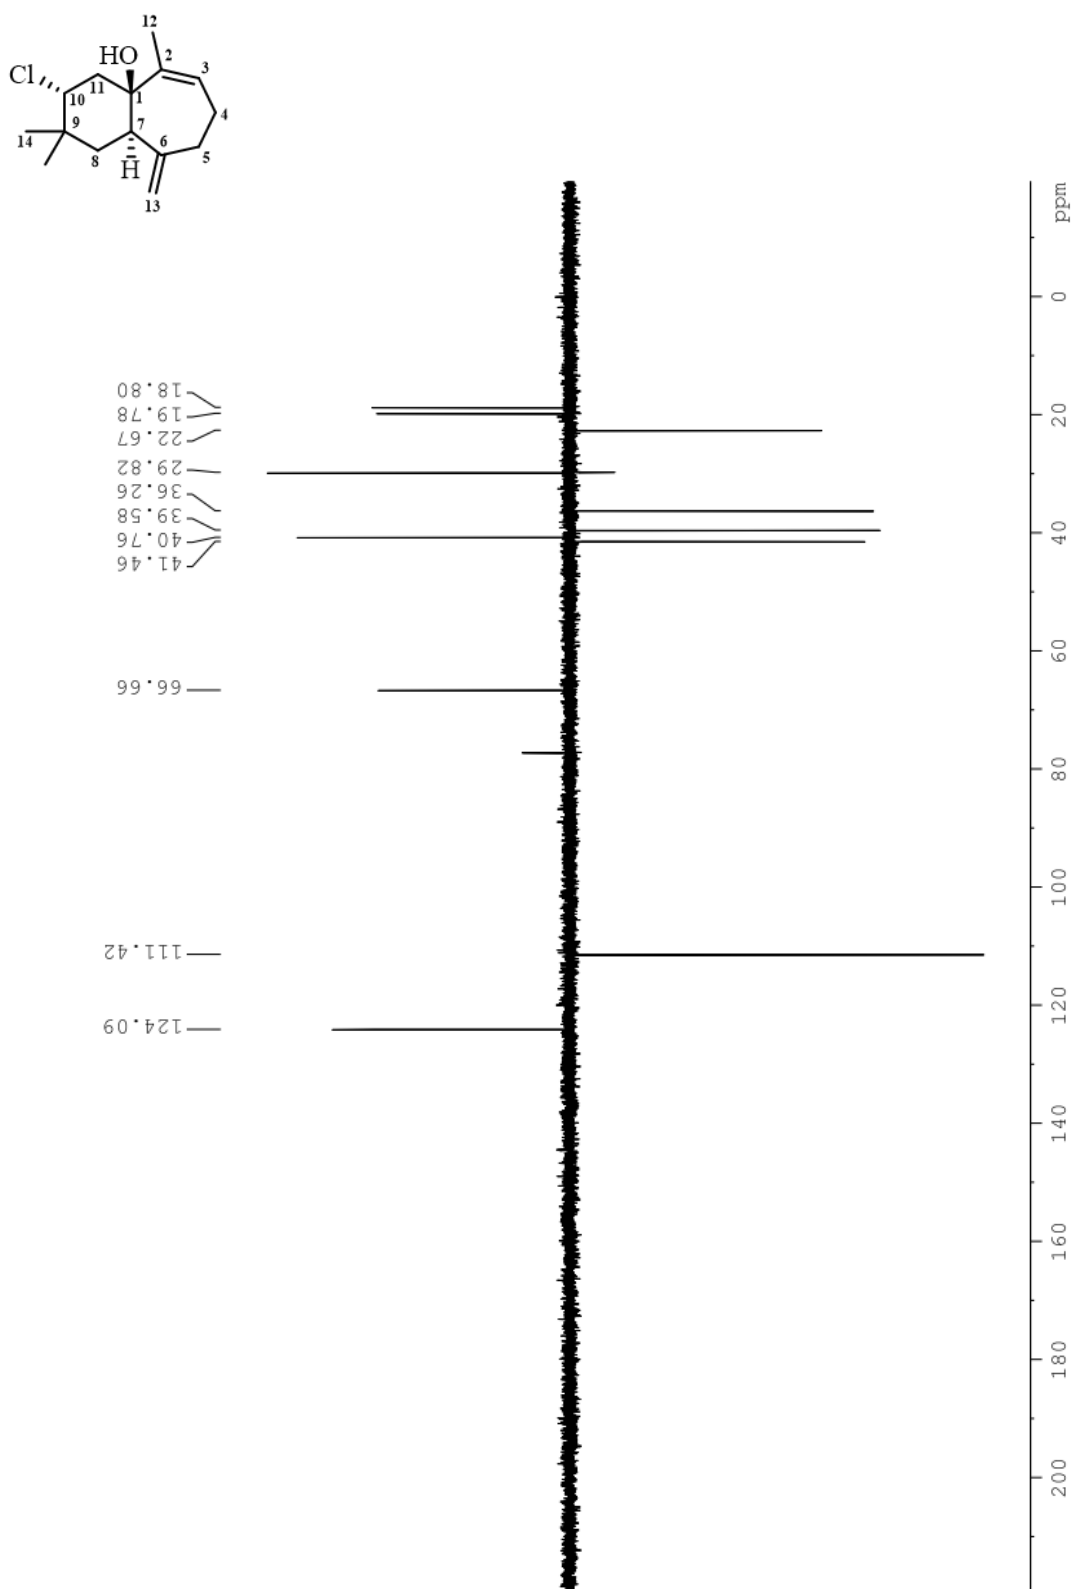

**Figure S29.** DEPT-135 spectrum of **8** (CDCl<sub>3</sub>, 100 MHz).

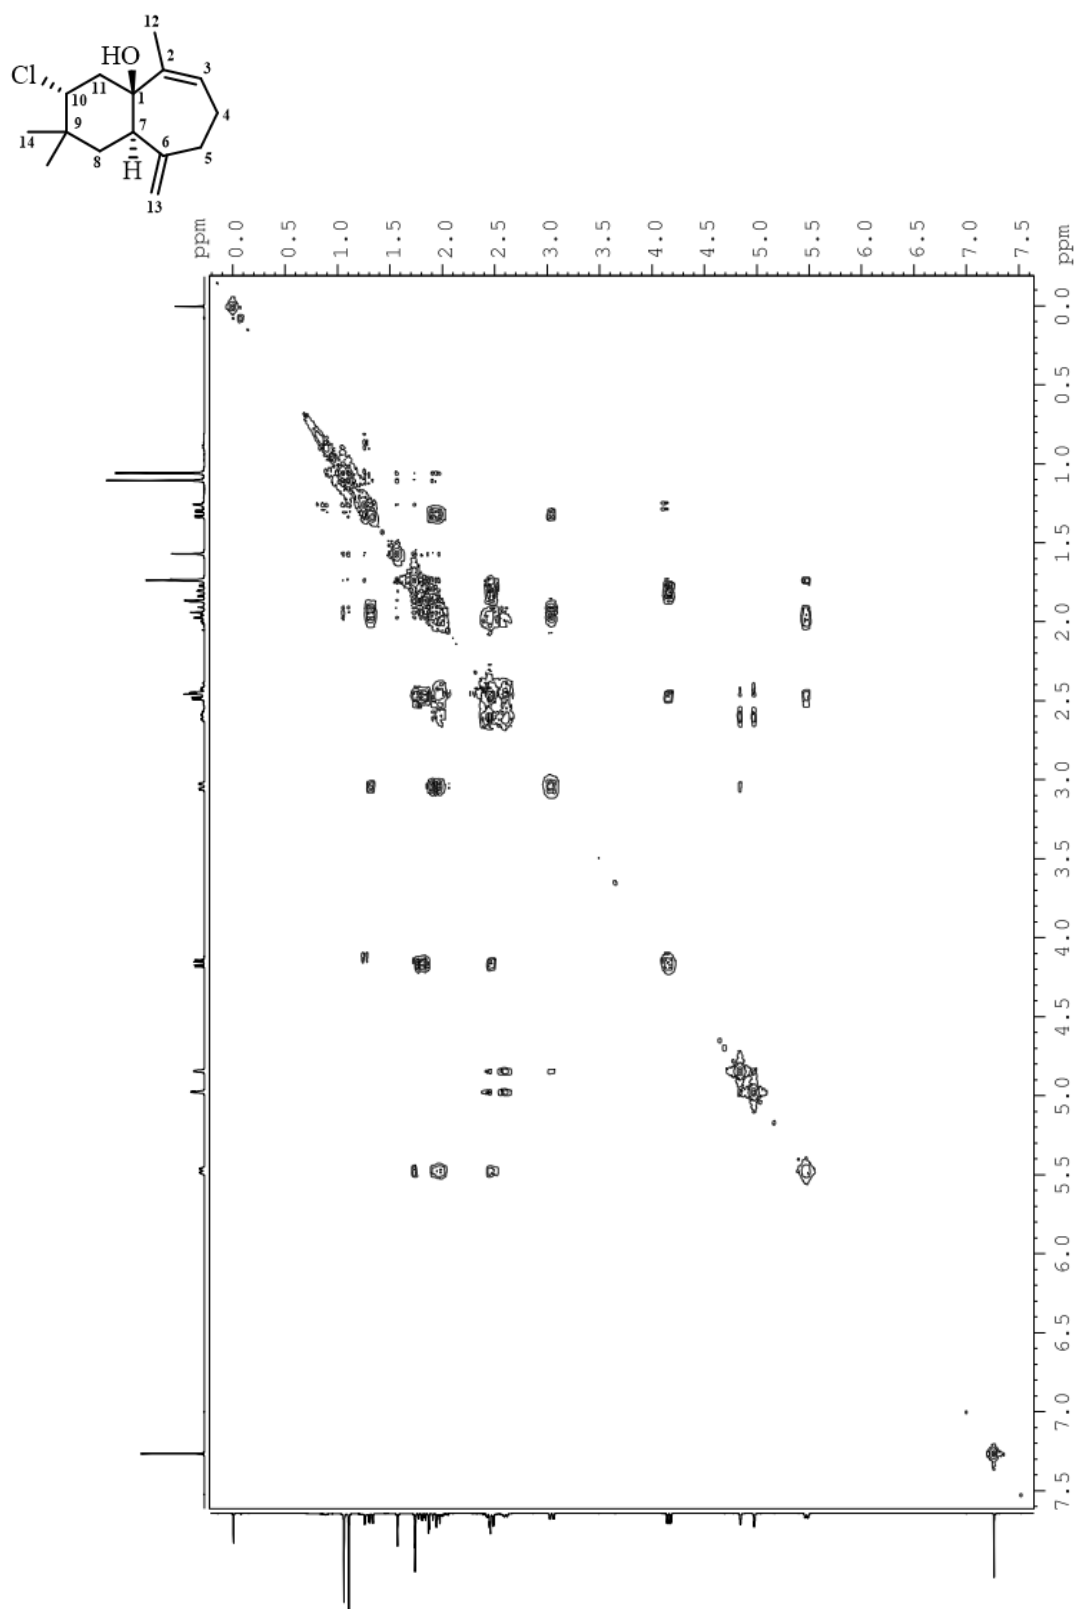

**Figure S30.**  $^1\text{H}$ - $^1\text{H}$  COSY of **8** ( $\text{CDCl}_3$ , 400 MHz).

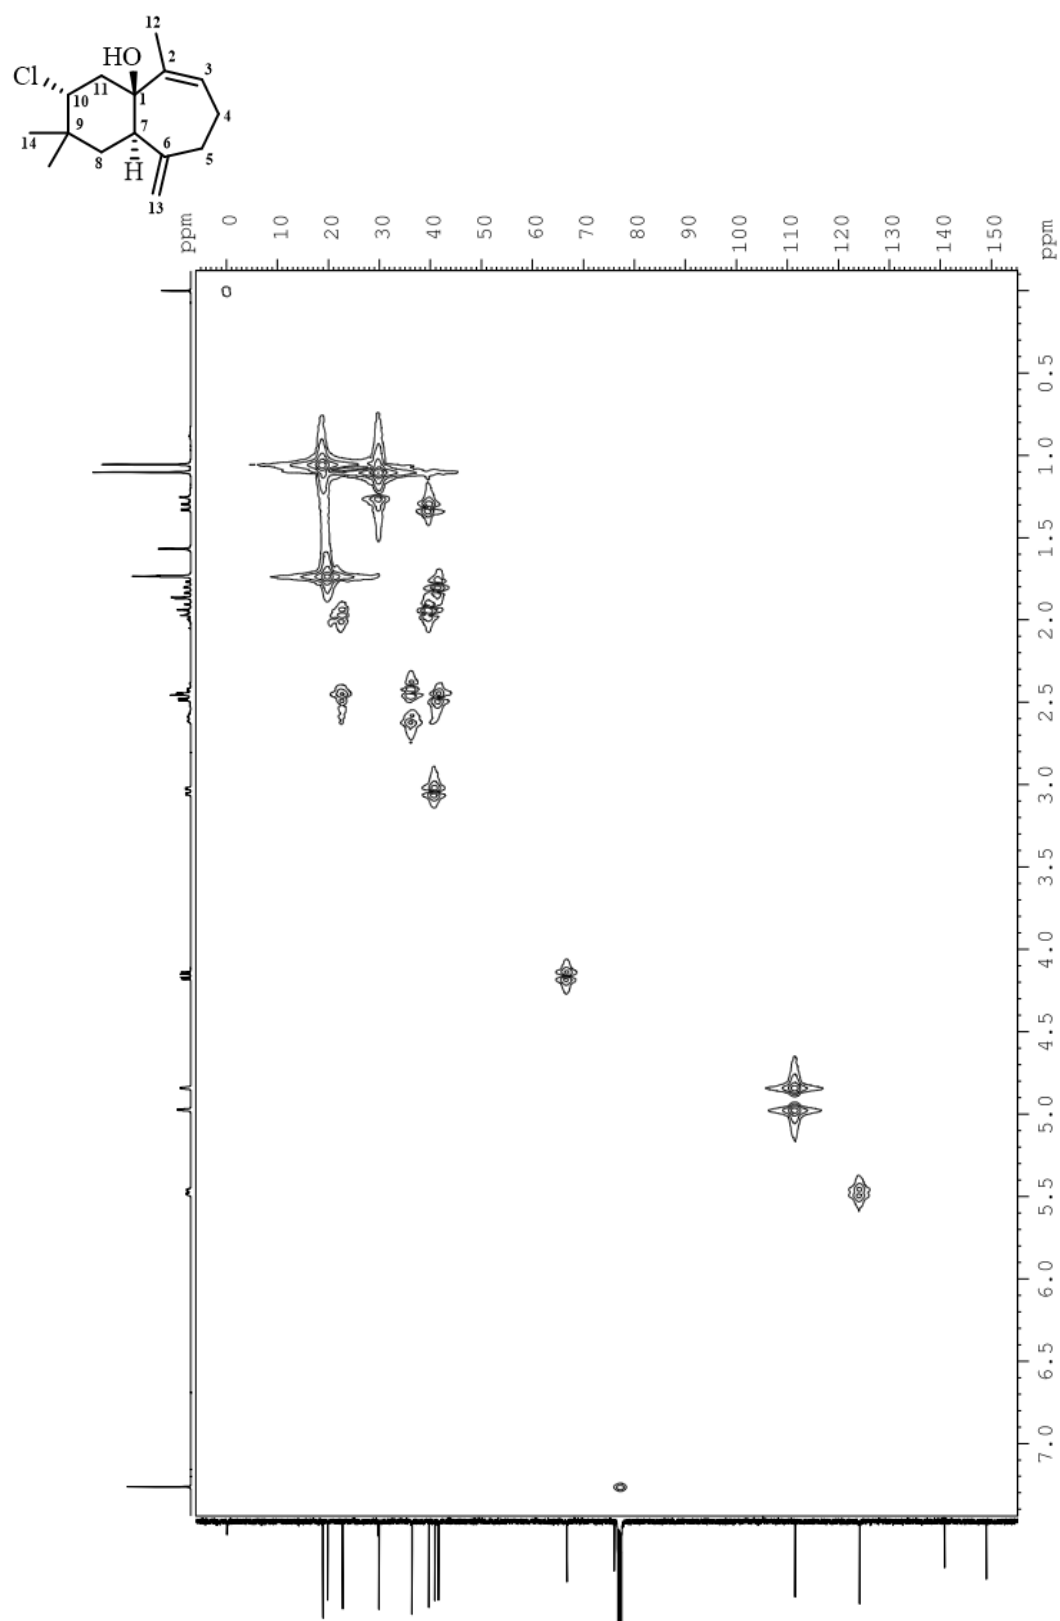

**Figure S31.**  $^1\text{H}$ - $^{13}\text{C}$  HMQC of **8** ( $\text{CDCl}_3$ , 400 MHz).

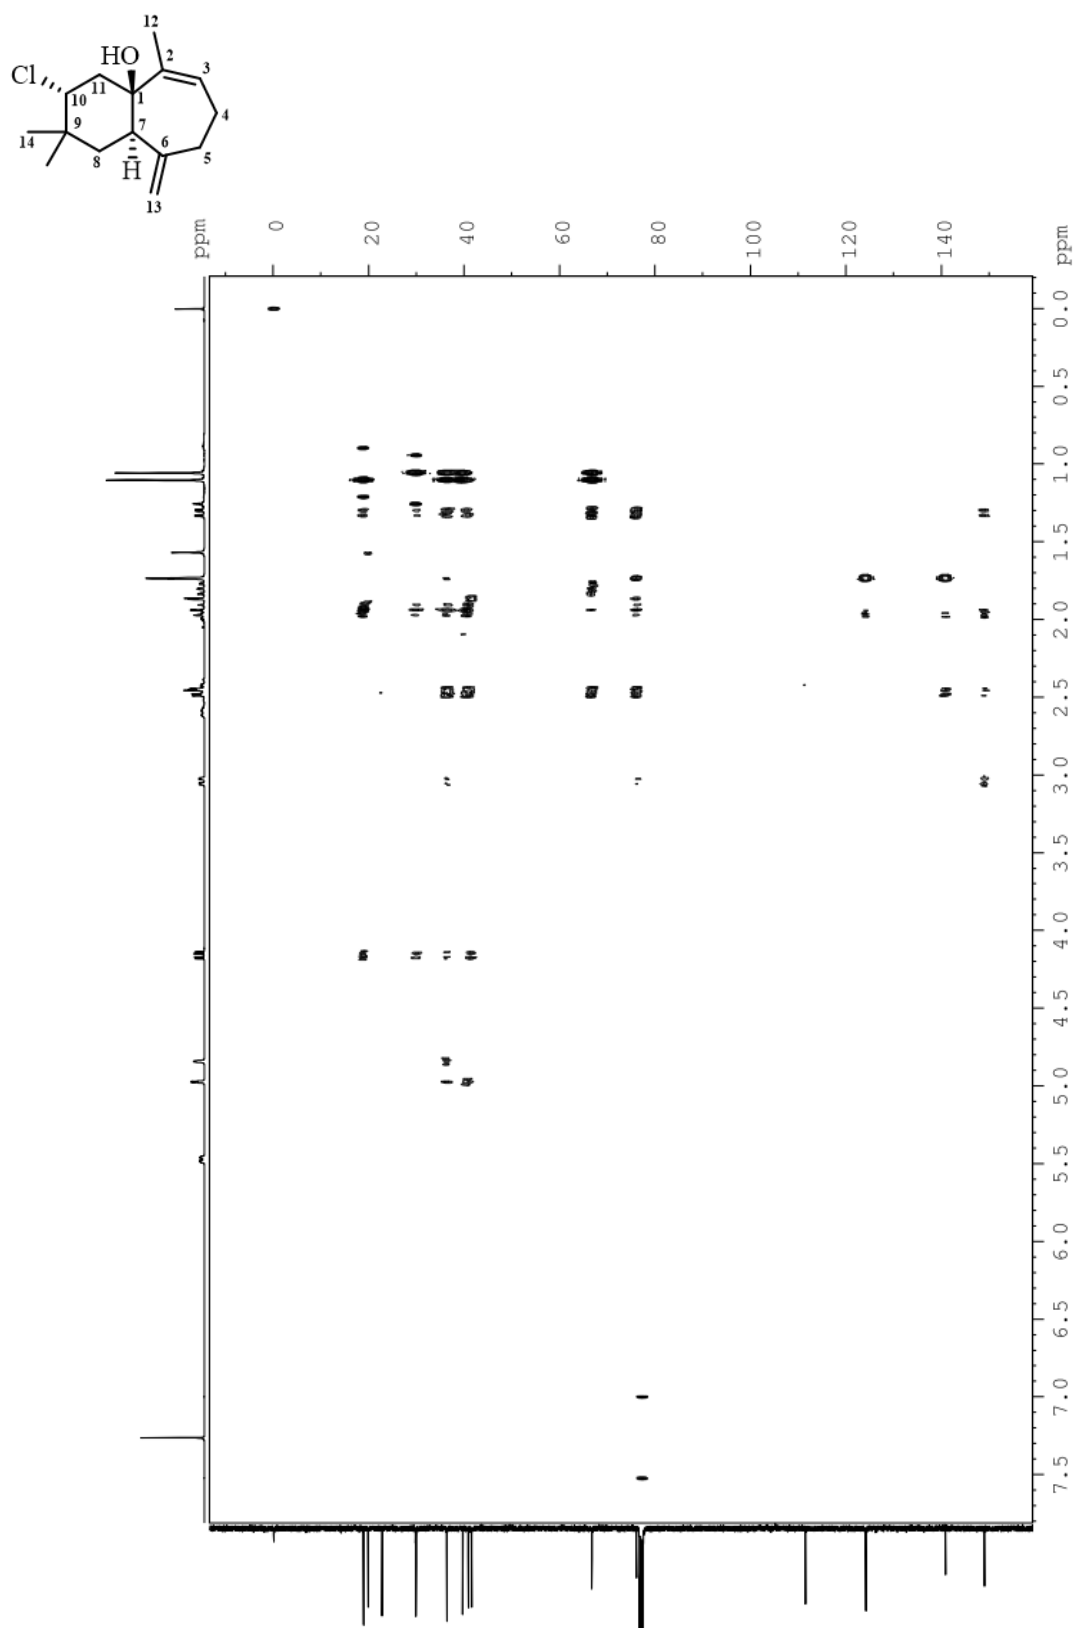

**Figure S32.**  $^1\text{H}$ - $^{13}\text{C}$  HMBC of **8** ( $\text{CDCl}_3$ , 400 MHz).

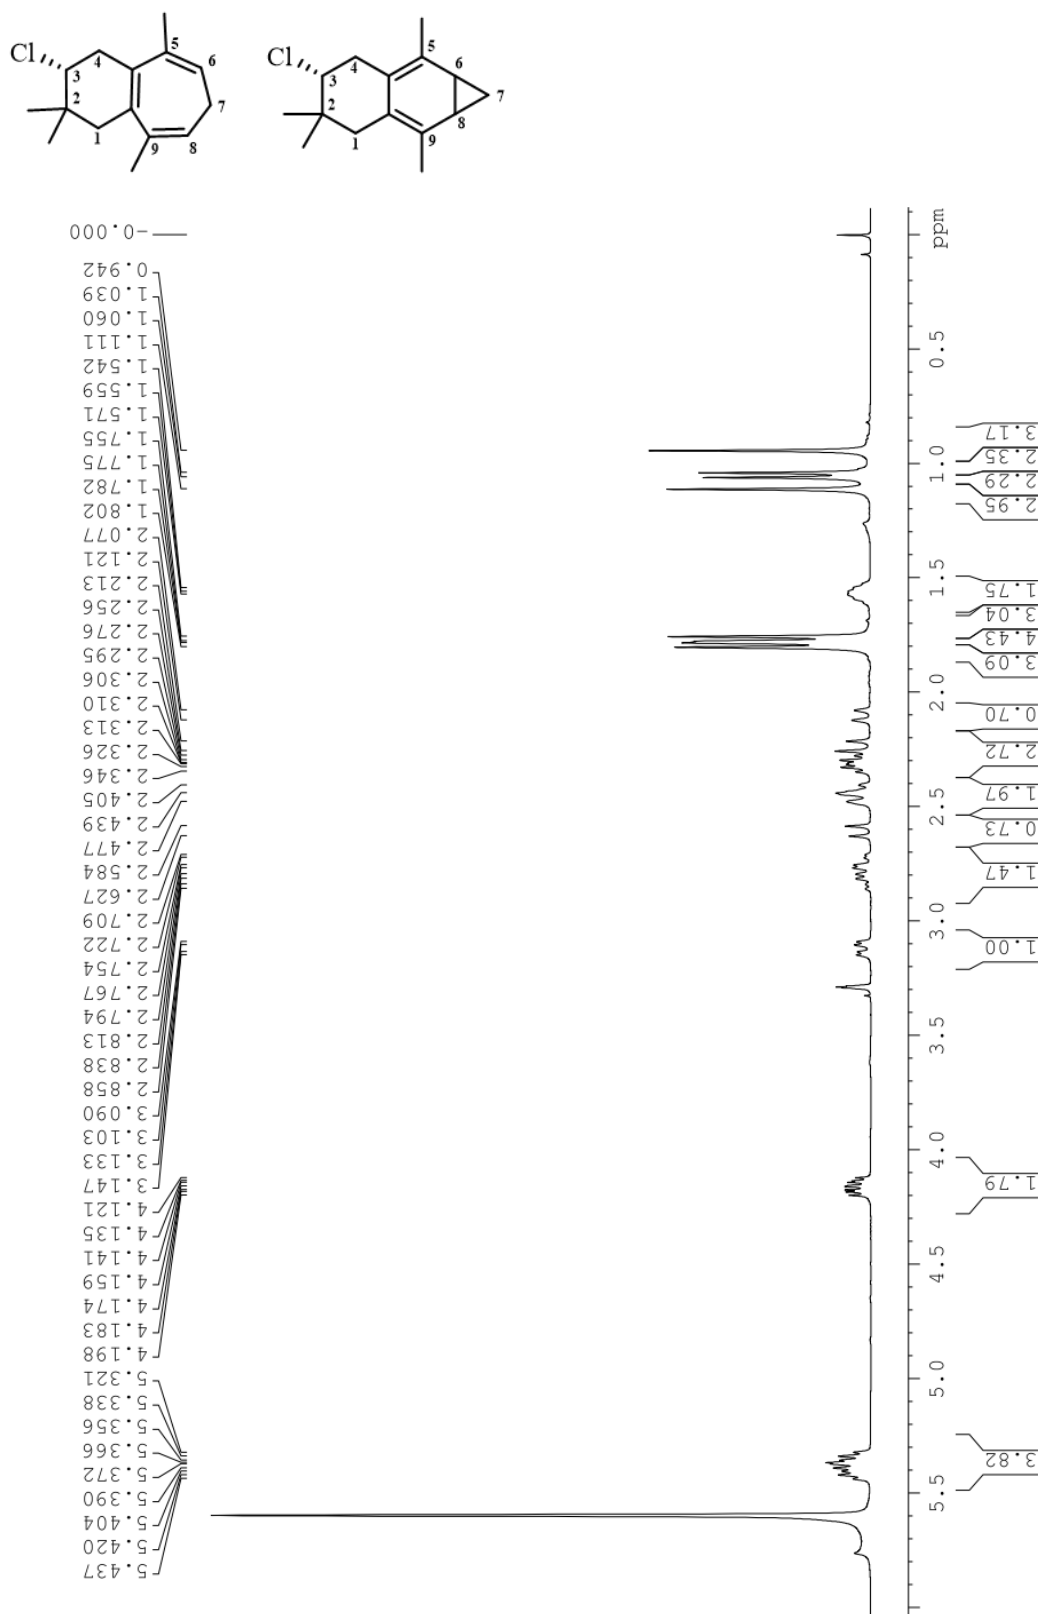

**Figure S33.** <sup>1</sup>H NMR spectrum of isomers **9** and **10** (CD<sub>3</sub>OD, 400 MHz, -50 °C).

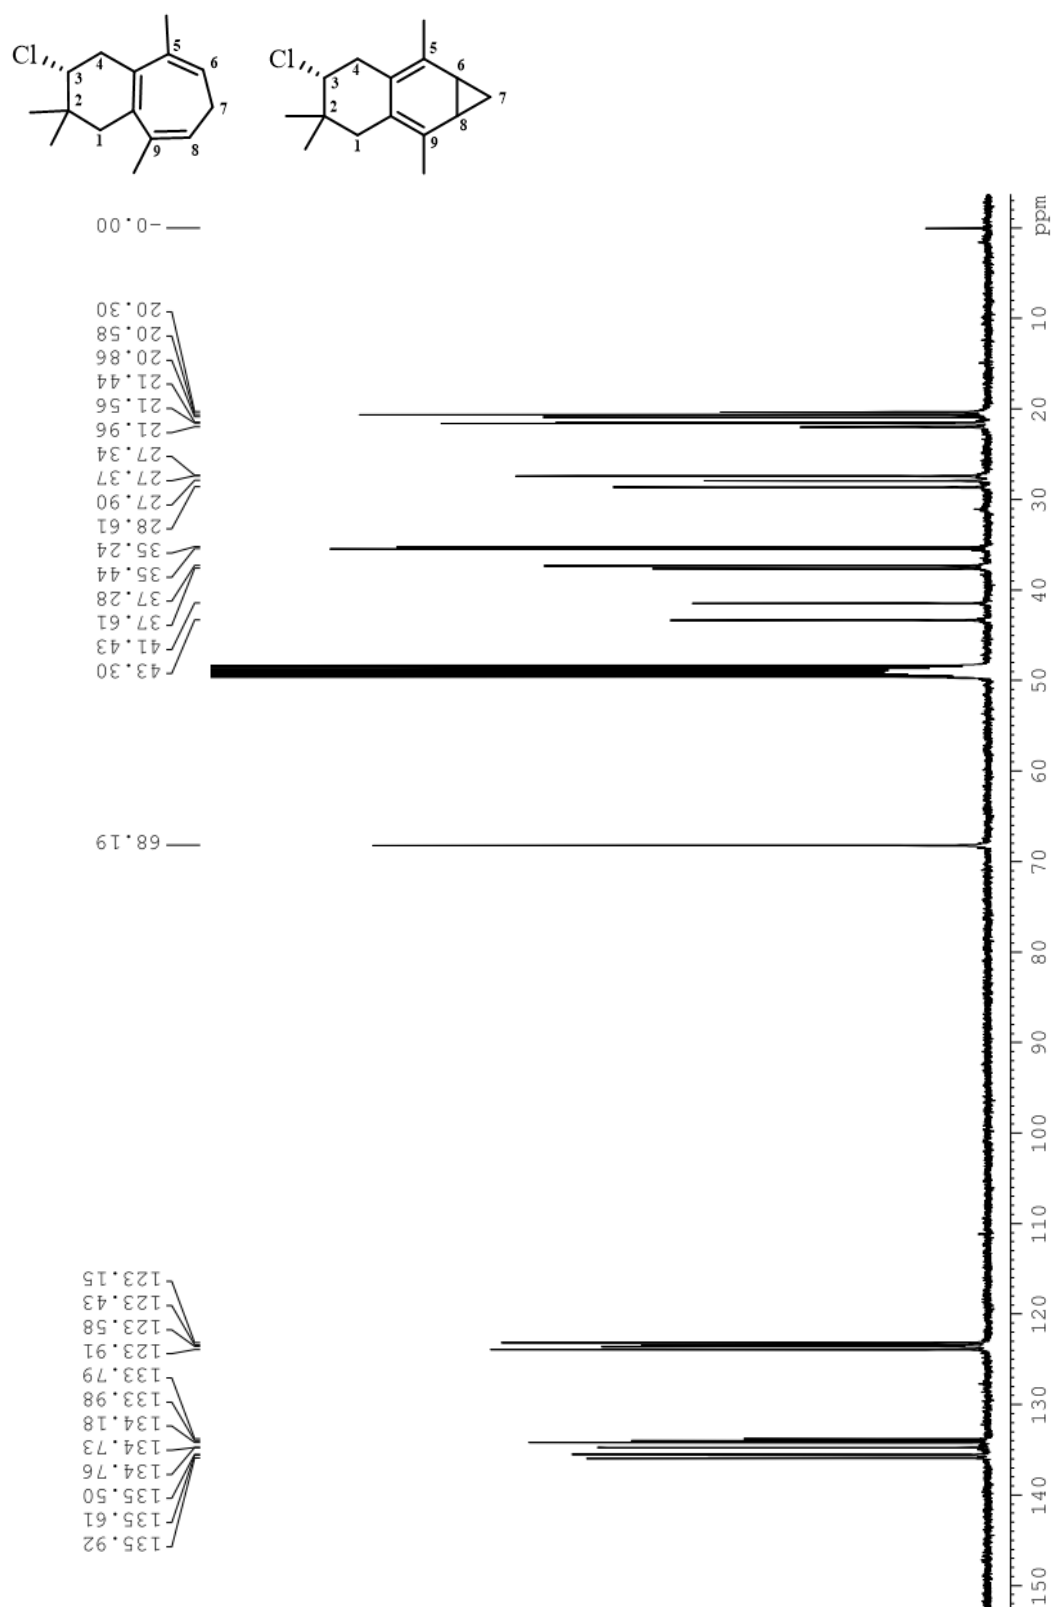

**Figure S34.**  $^{13}\text{C}\{^1\text{H}\}$  NMR spectrum of isomers **9** and **10** ( $\text{CD}_3\text{OD}$ , 100 MHz,  $-50^\circ\text{C}$ ).

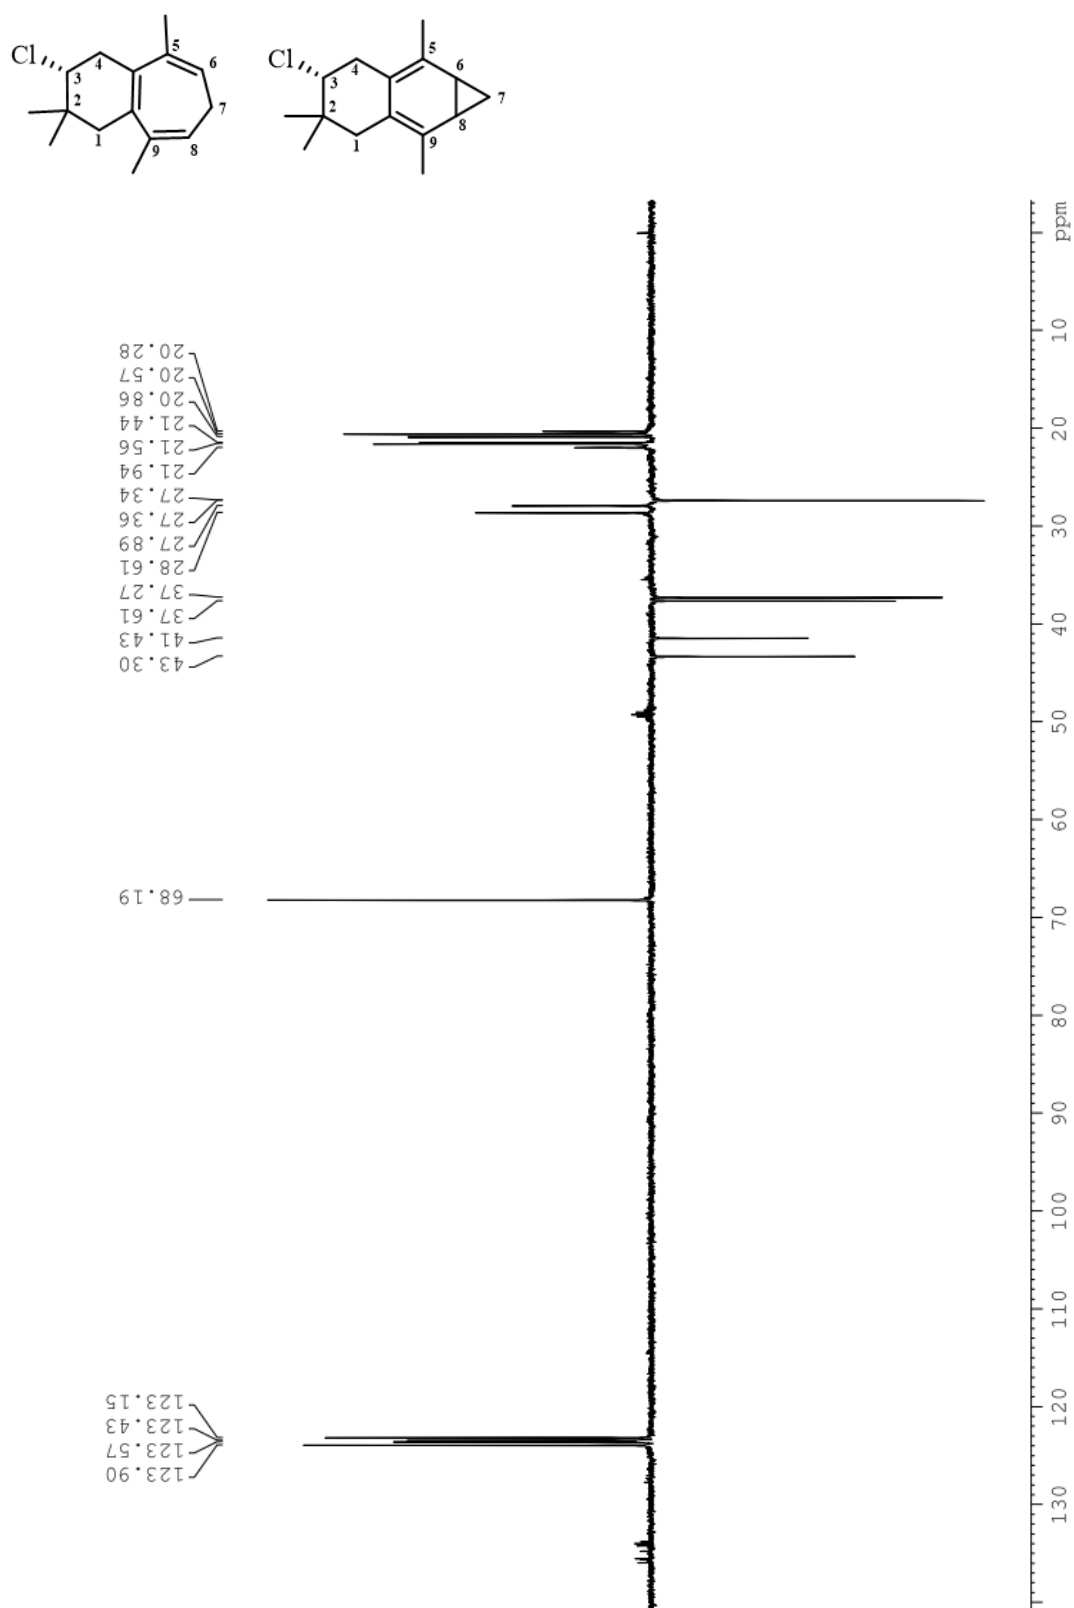

**Figure S35.** DEPT-135 spectrum of isomers **9** and **10** (CD<sub>3</sub>OD, 100 MHz, -50 °C).



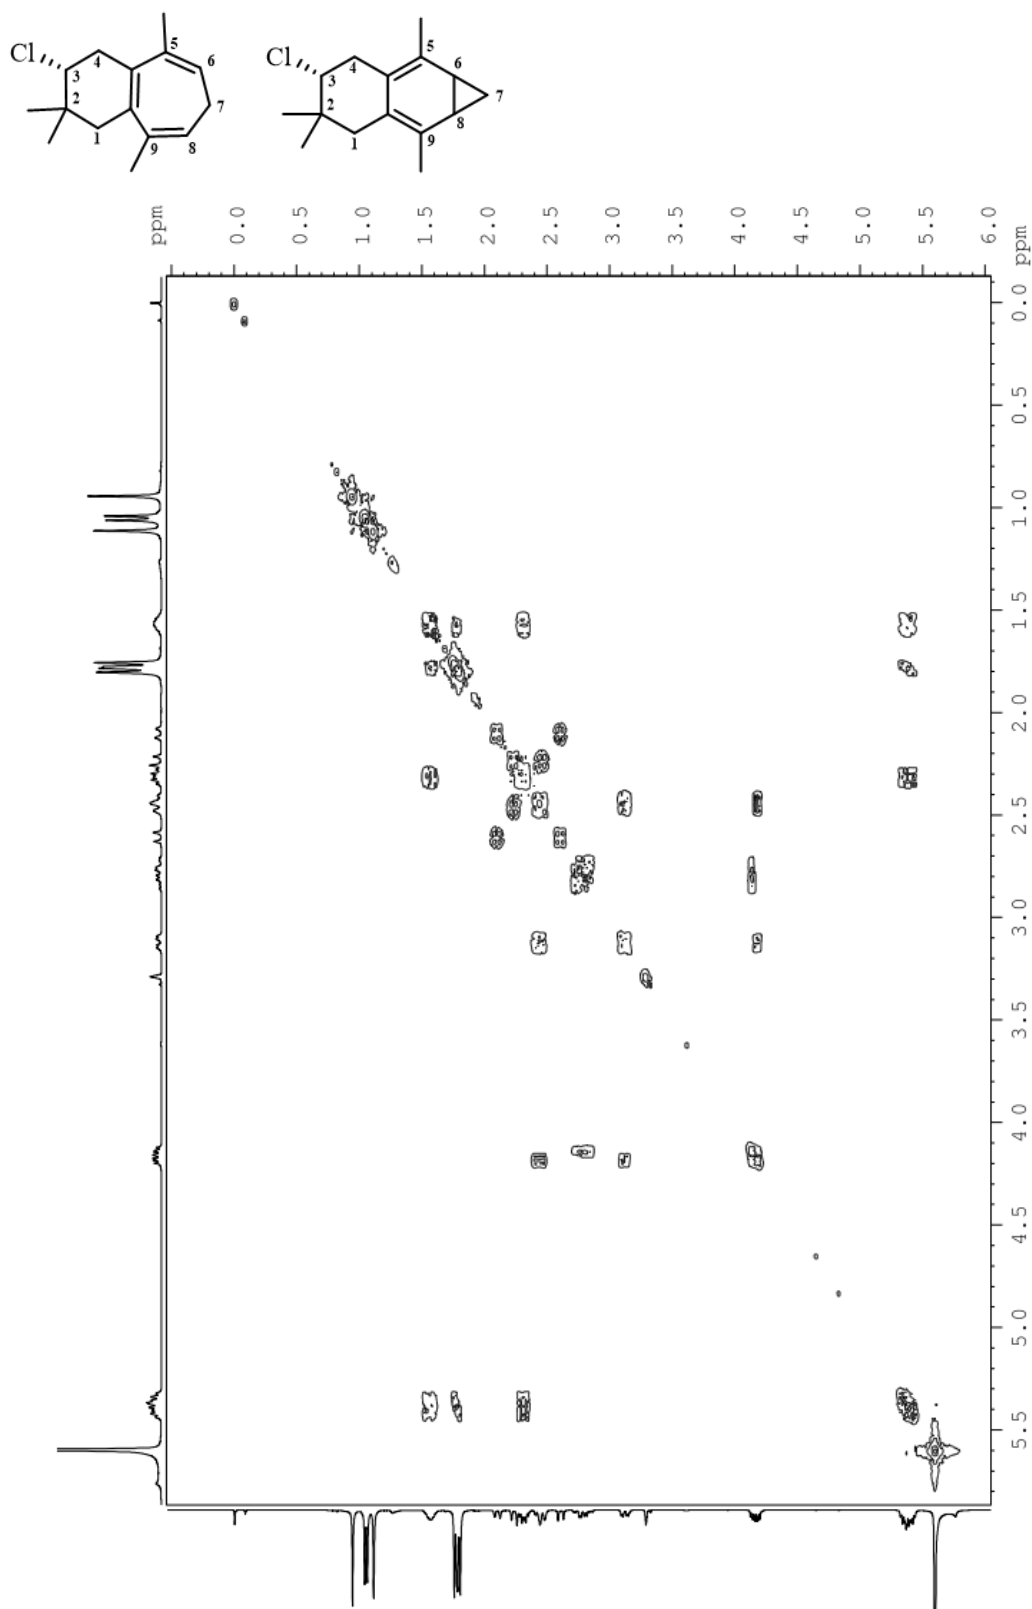

**Figure S36.**  $^1\text{H}$ - $^1\text{H}$  COSY of isomers **9** and **10** ( $\text{CD}_3\text{OD}$ ,  $400\text{ MHz}$ ,  $-50\text{ }^\circ\text{C}$ ).

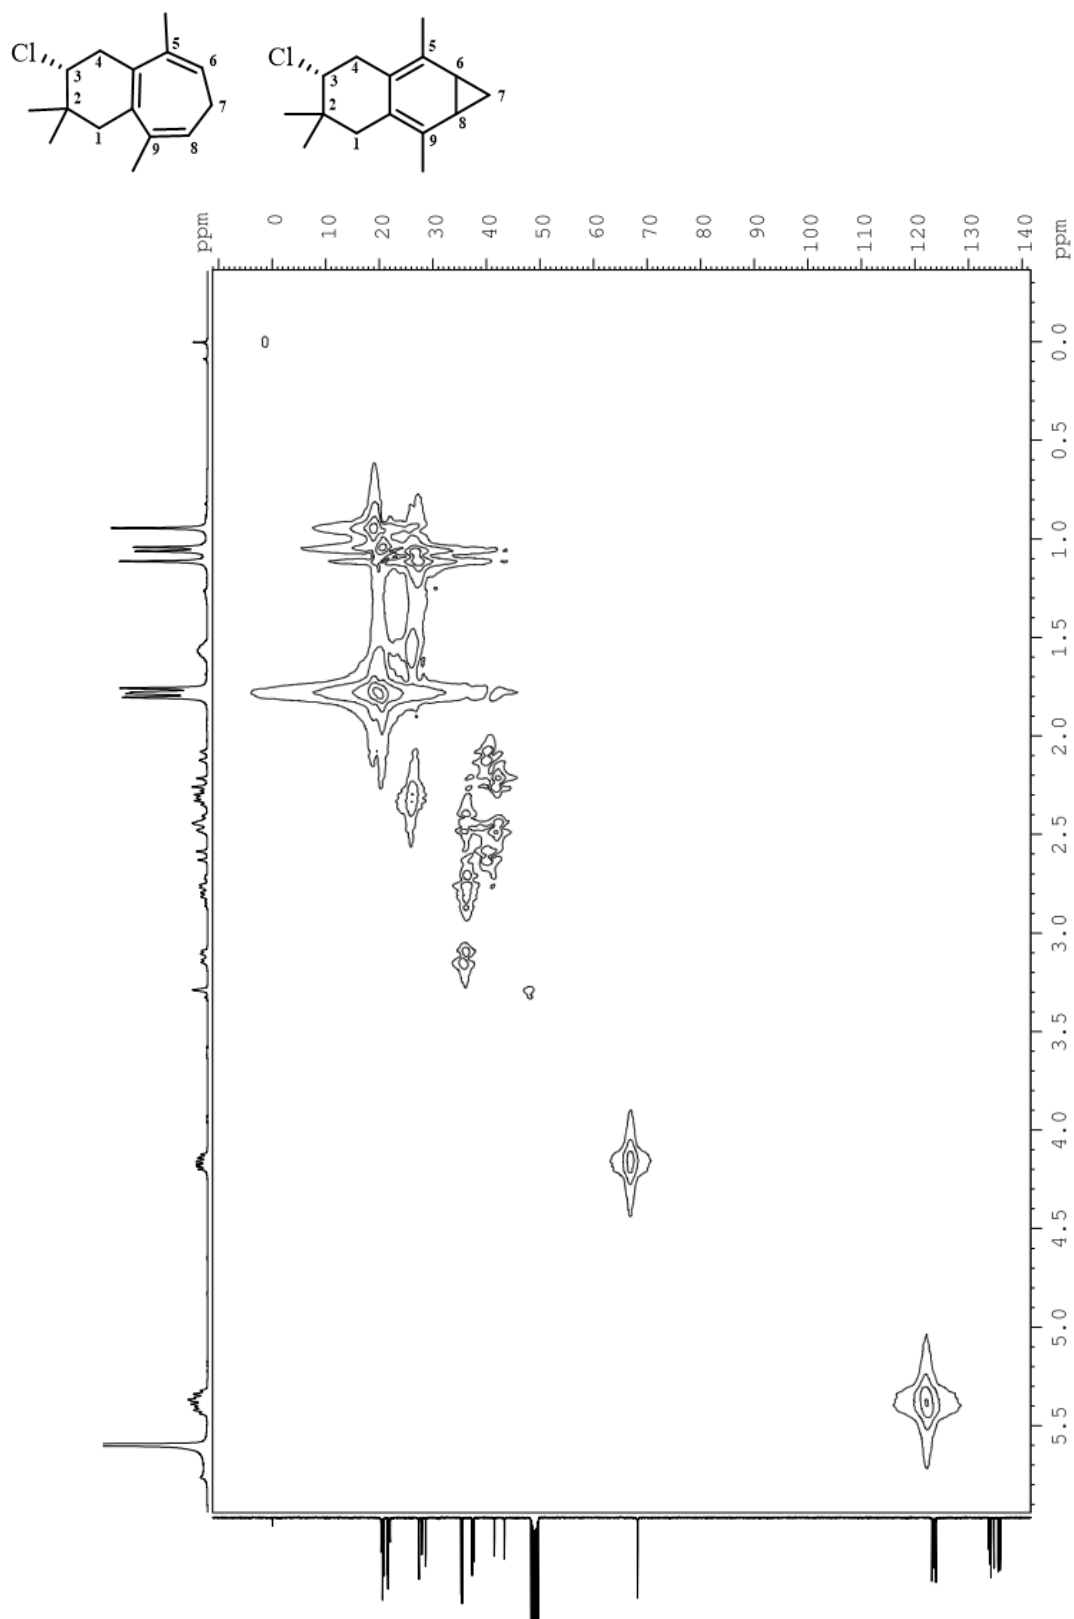

**Figure S37.**  $^1\text{H}$ - $^{13}\text{C}$  HMQC of isomers **9** and **10** ( $\text{CD}_3\text{OD}$ ,  $400\text{ MHz}$ ,  $-50\text{ }^\circ\text{C}$ ).

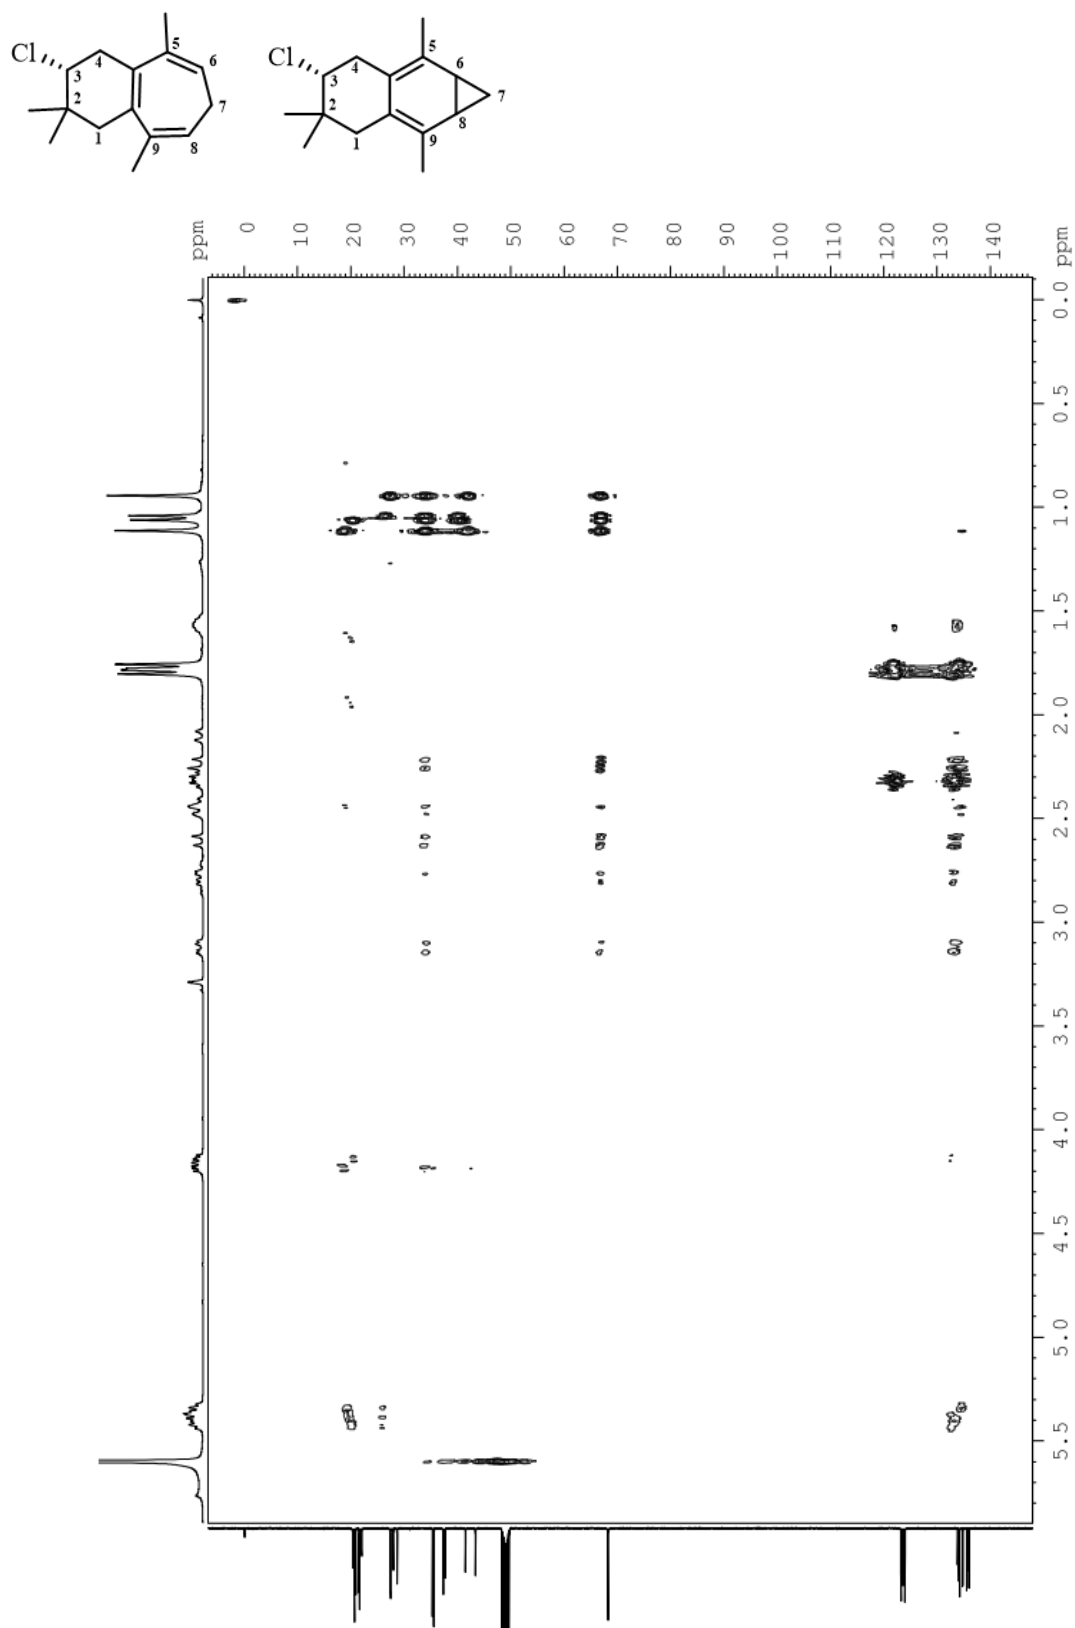

**Figure S38.**  $^1\text{H}$ - $^{13}\text{C}$  HMBC of isomers **9** and **10** ( $\text{CD}_3\text{OD}$ , 400 MHz,  $-50^\circ\text{C}$ ).

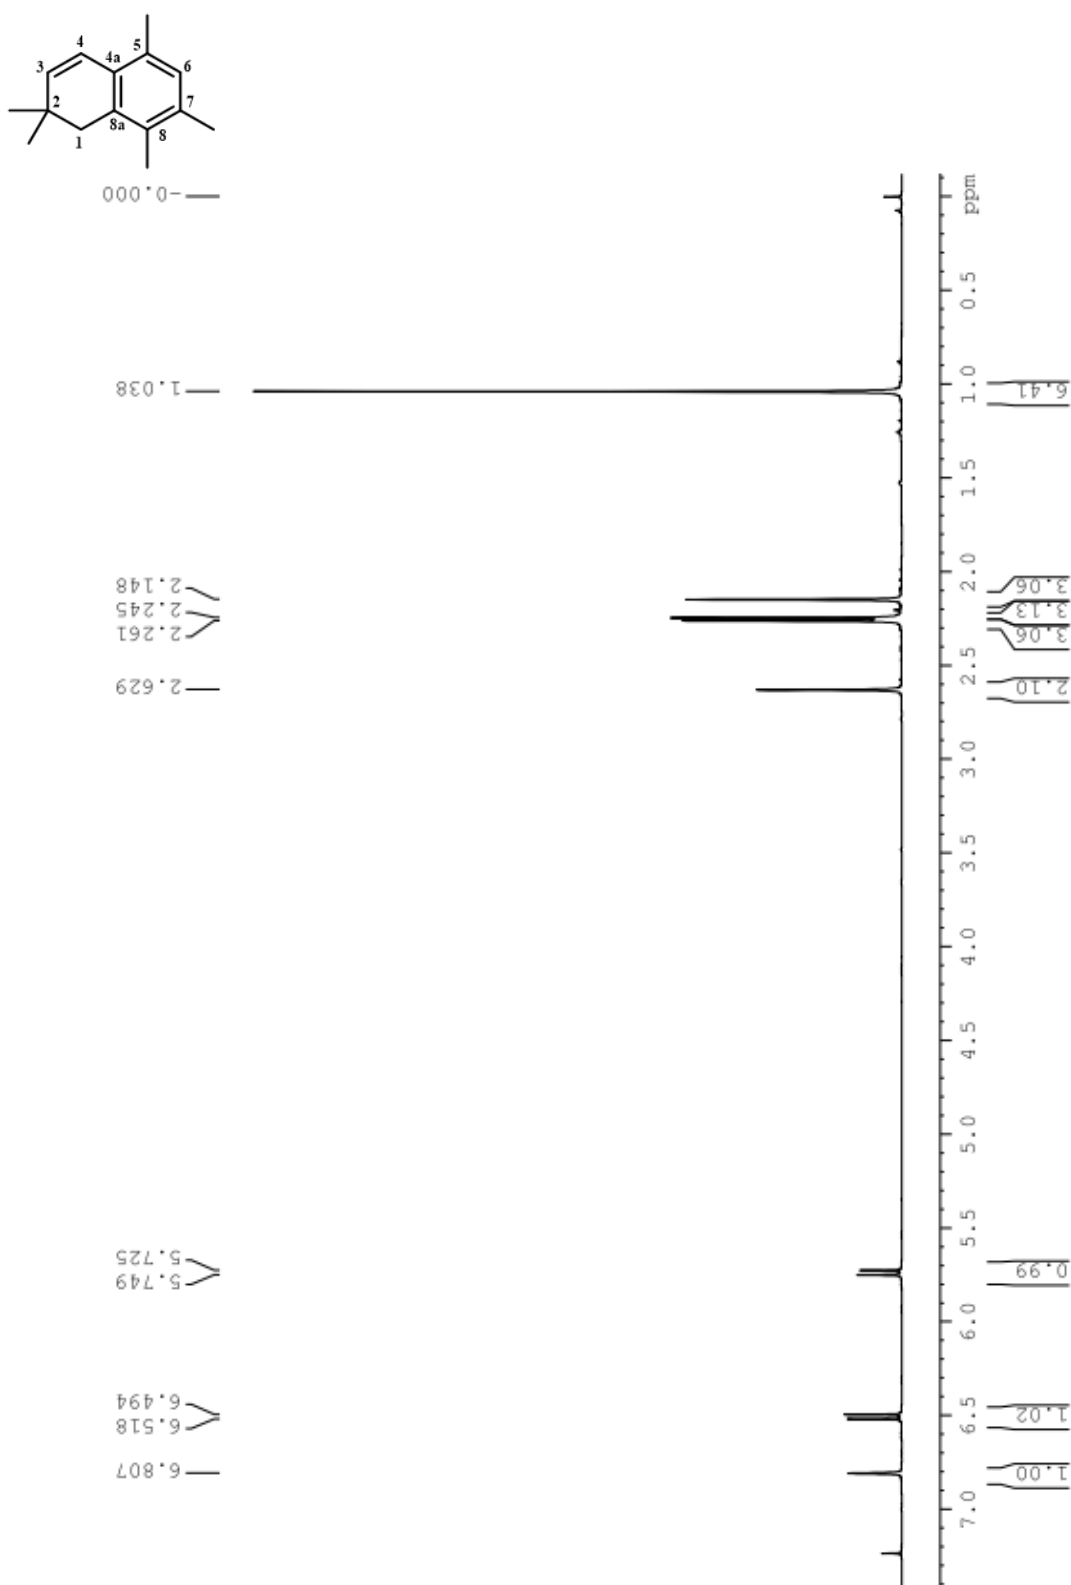

**Figure S39.** <sup>1</sup>H NMR spectrum of **2** (CDCl<sub>3</sub>, 400 MHz).

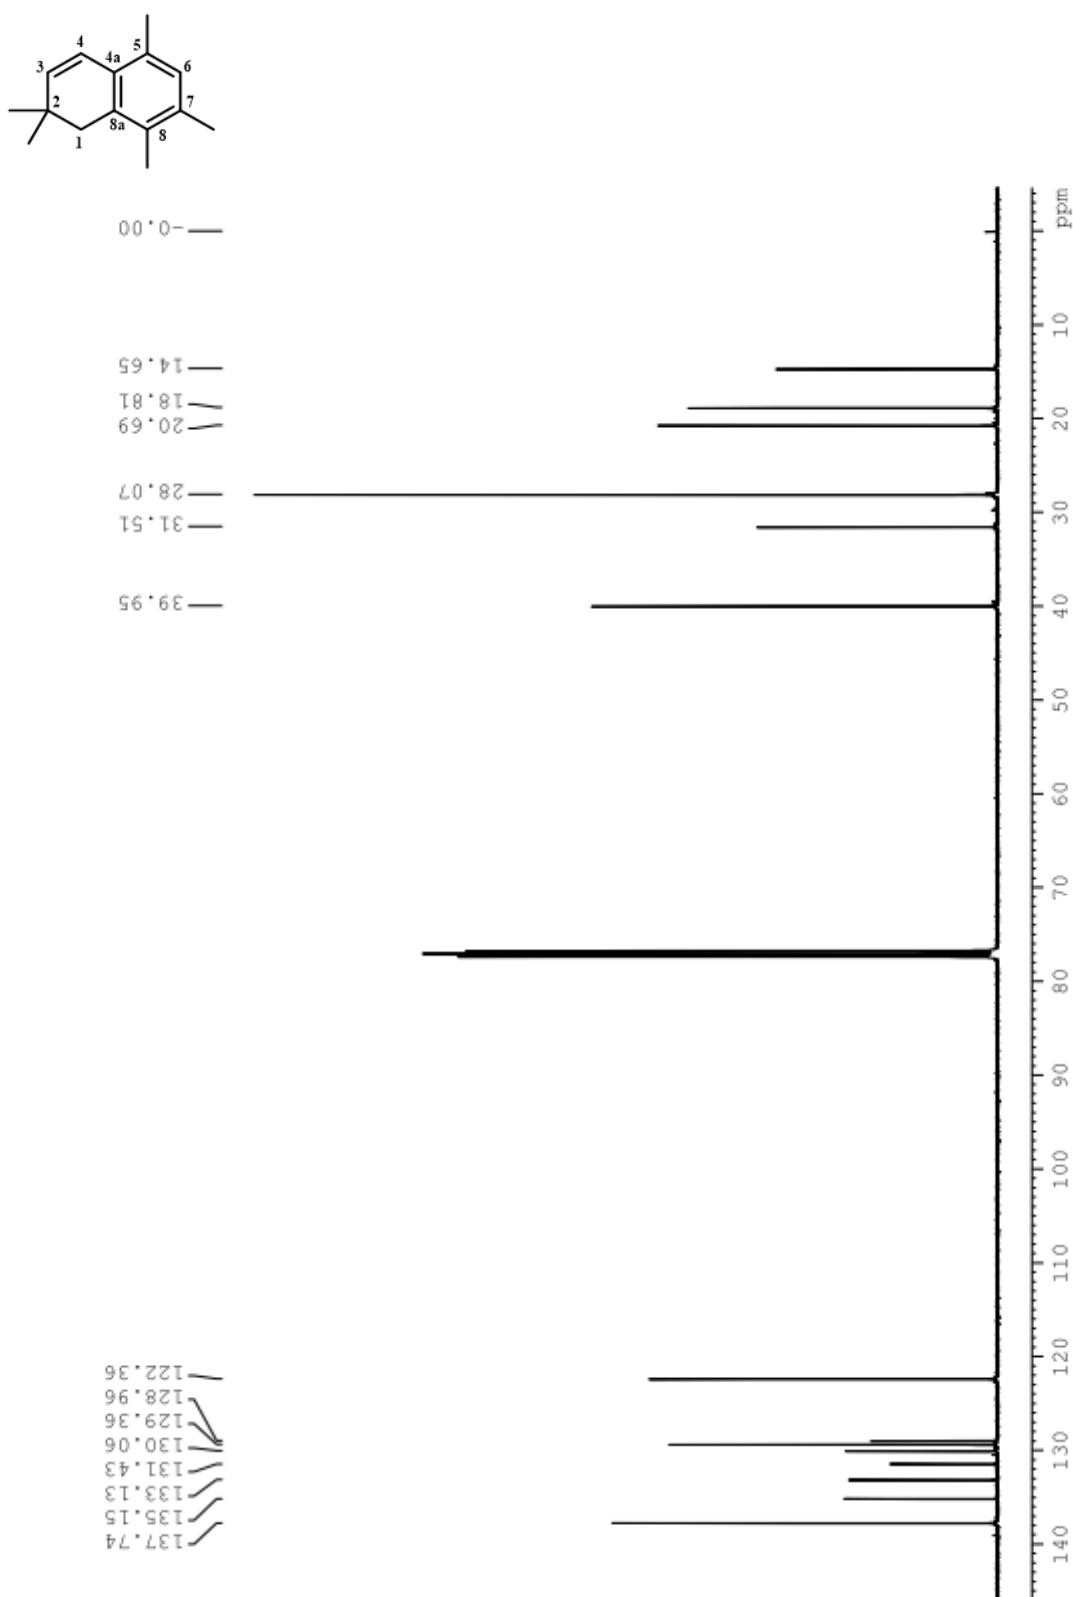

**Figure S40.**  $^{13}\text{C}\{^1\text{H}\}$  NMR spectrum of **2** (CDCl<sub>3</sub>, 100 MHz).

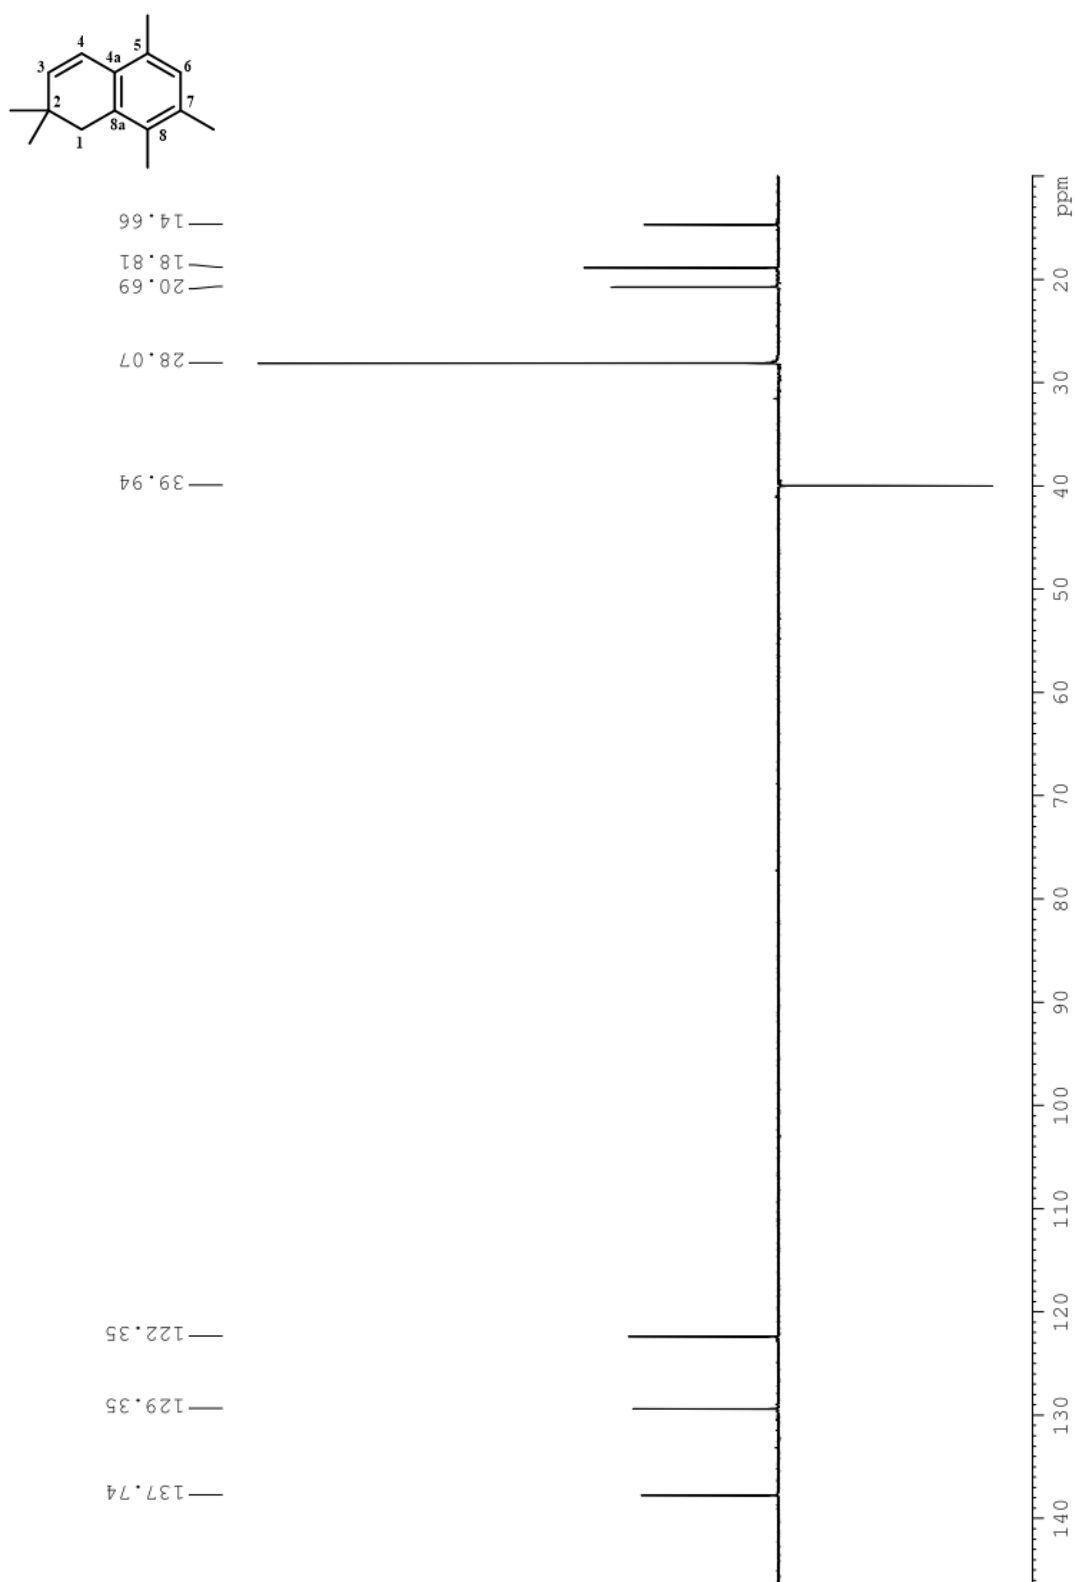

**Figure S41.** DEPT-135 spectrum of **2** (CDCl<sub>3</sub>, 100 MHz).

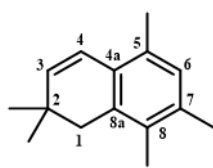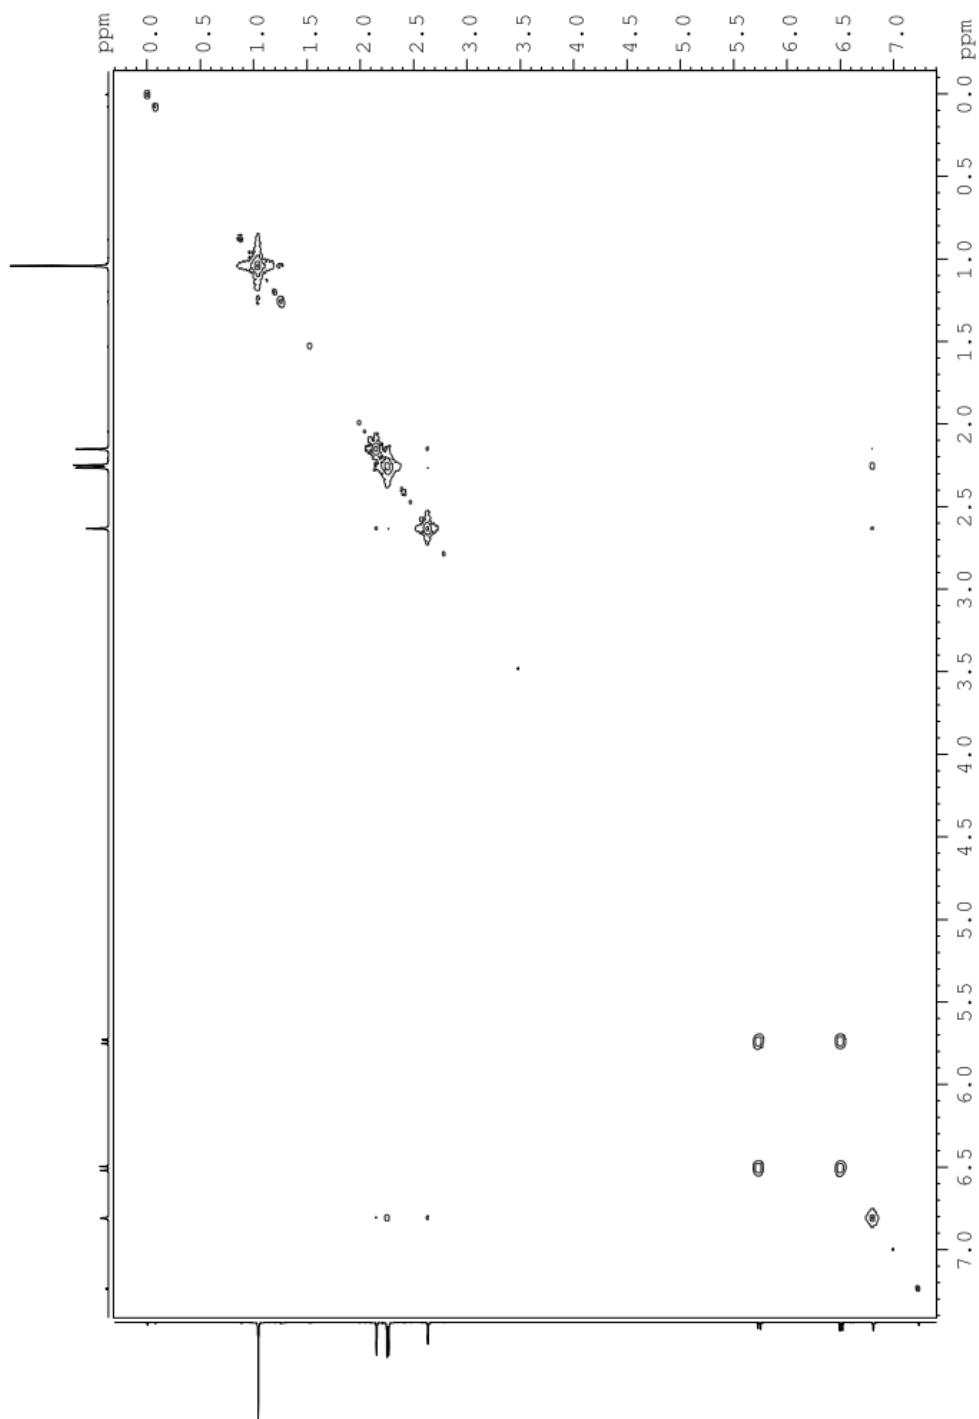

**Figure S42.** <sup>1</sup>H-<sup>1</sup>H COSY of **2** (CDCl<sub>3</sub>, 400 MHz).

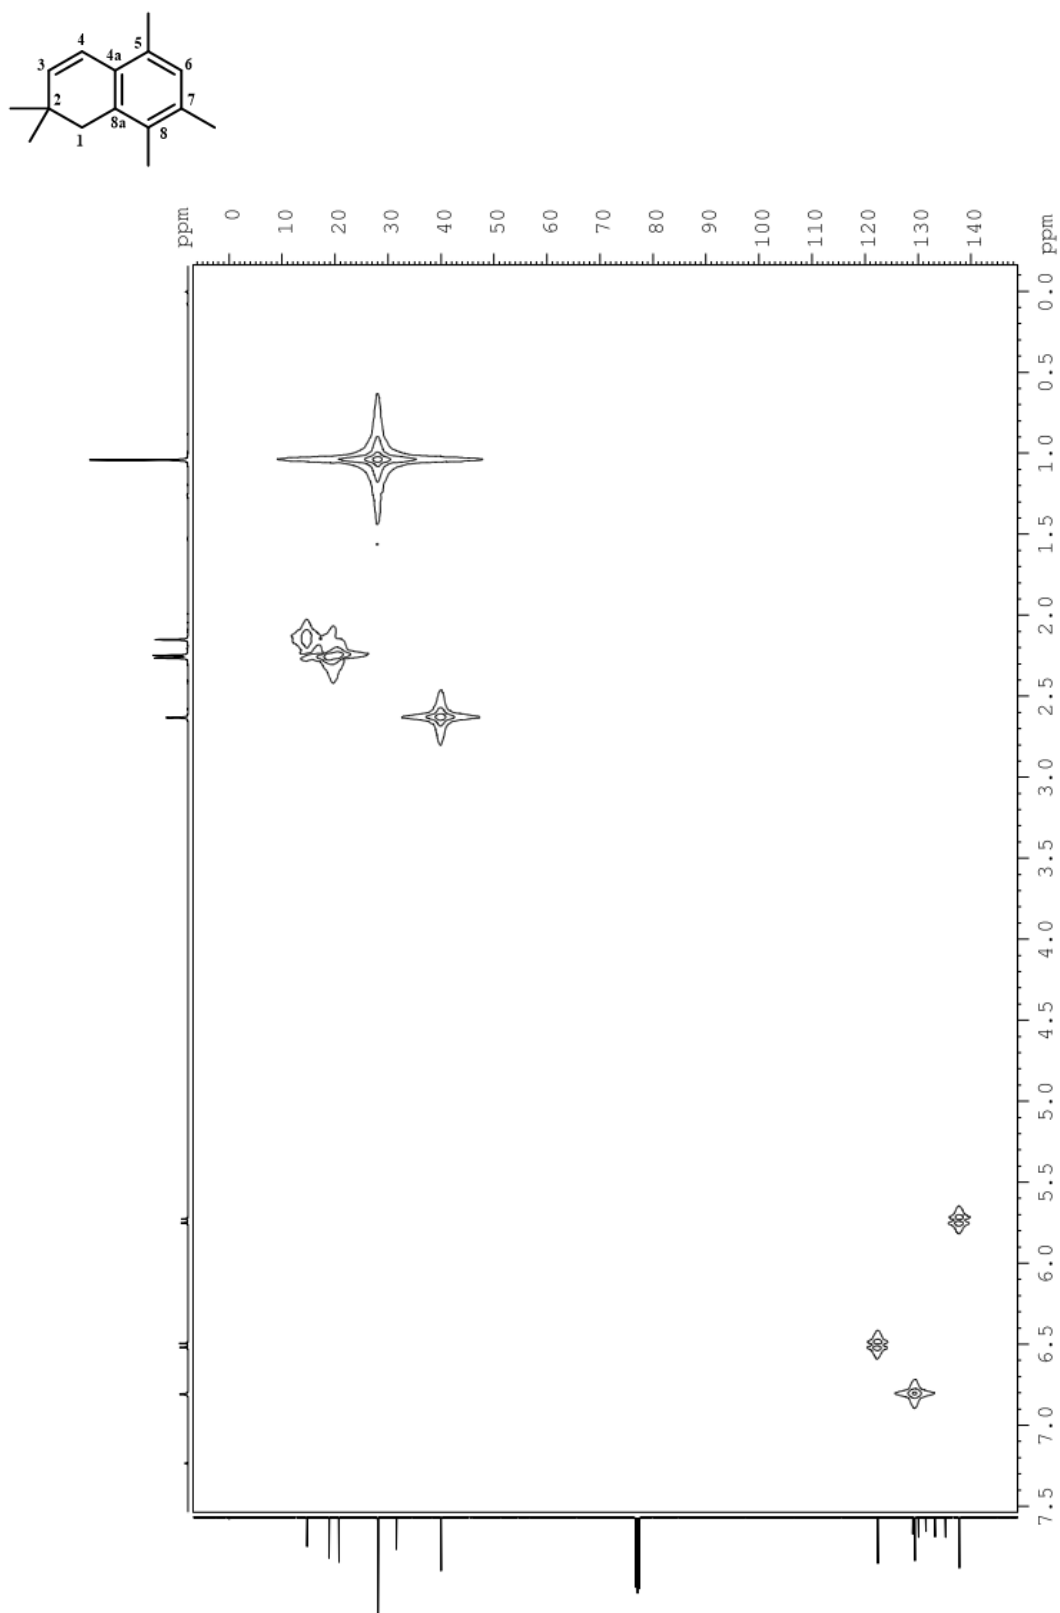

**Figure S43.**  $^1\text{H}$ - $^{13}\text{C}$  HMQC of **2** ( $\text{CDCl}_3$ , 400 MHz).



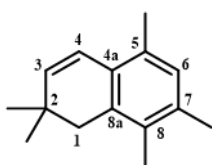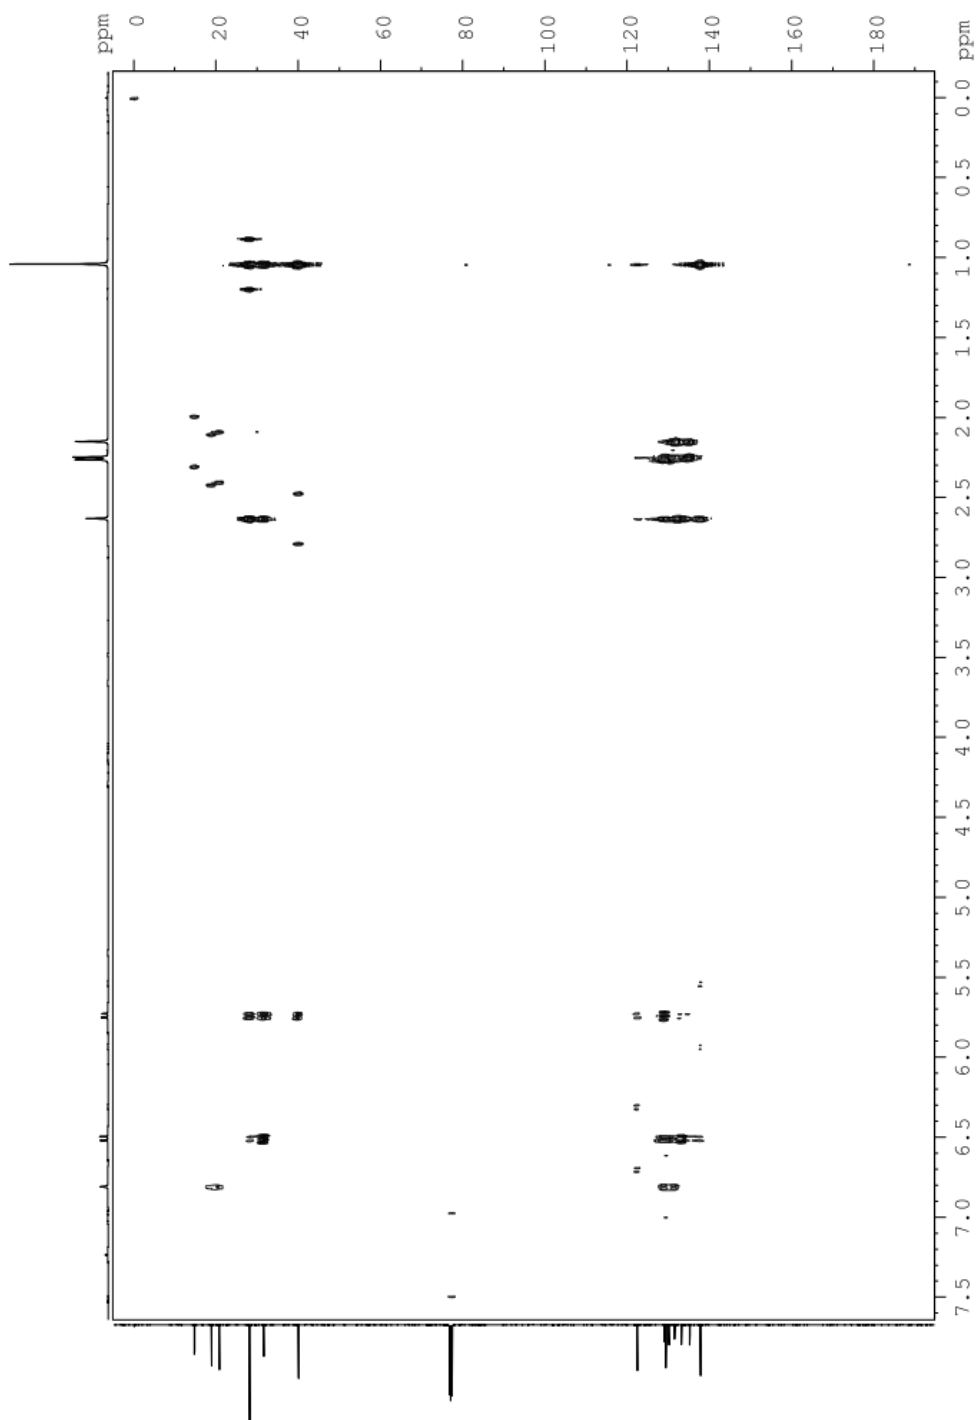

**Figure S44.**  $^1\text{H}$ - $^{13}\text{C}$  HMBC of **2** ( $\text{CDCl}_3$ , 400 MHz).

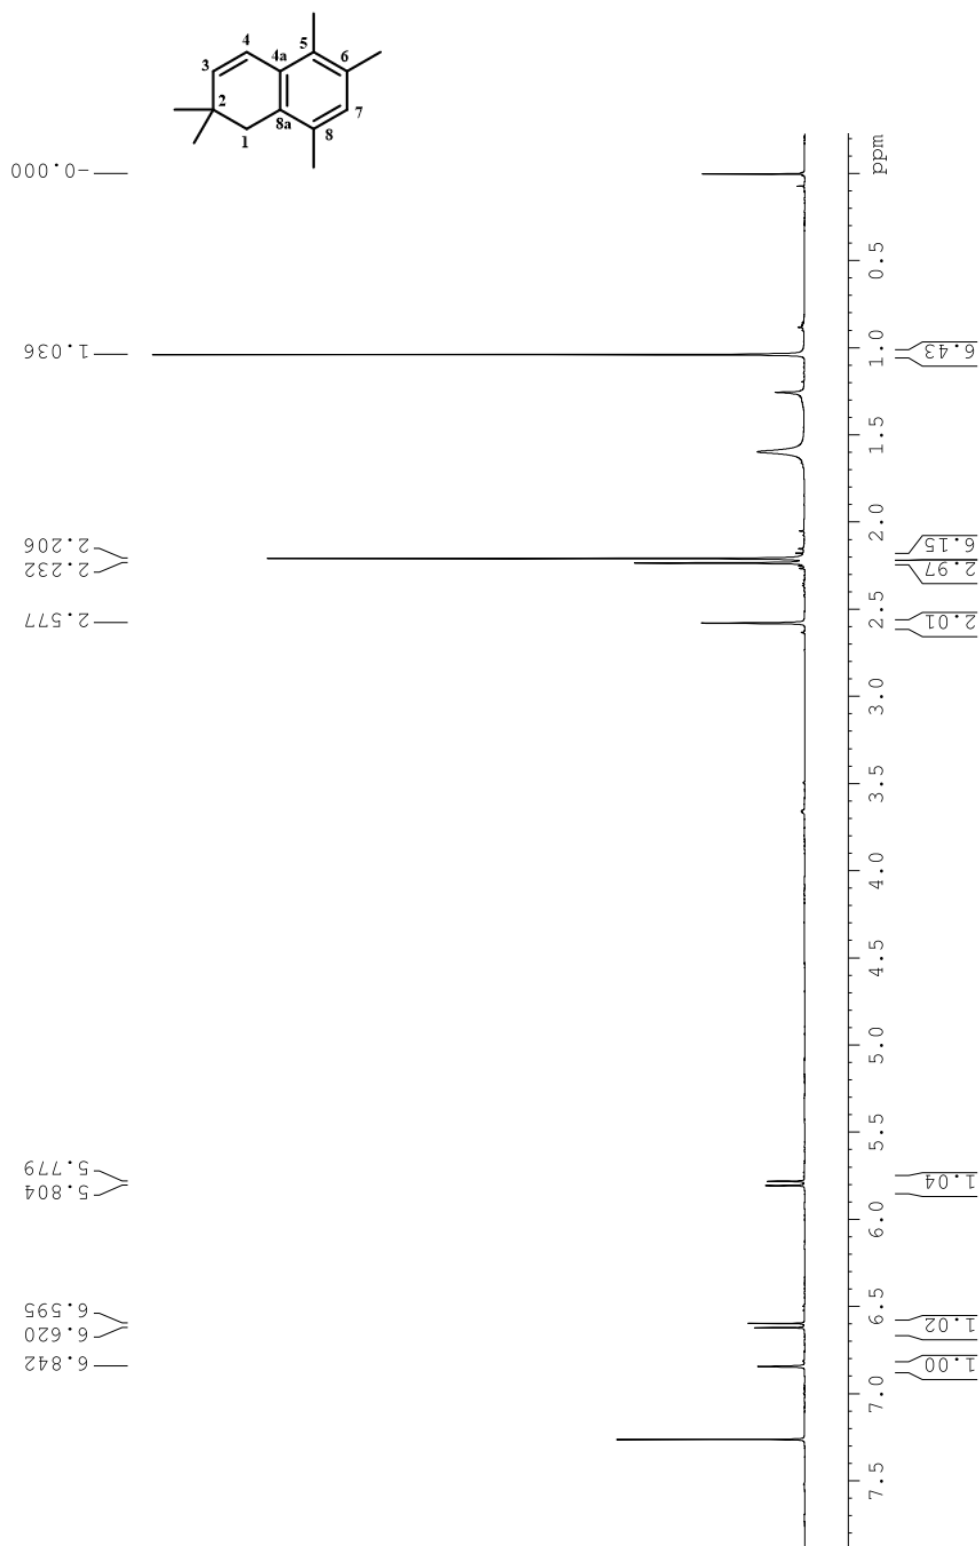

**Figure S45.**  $^1\text{H}$  NMR spectrum of **3** ( $\text{CDCl}_3$ , 400 MHz).

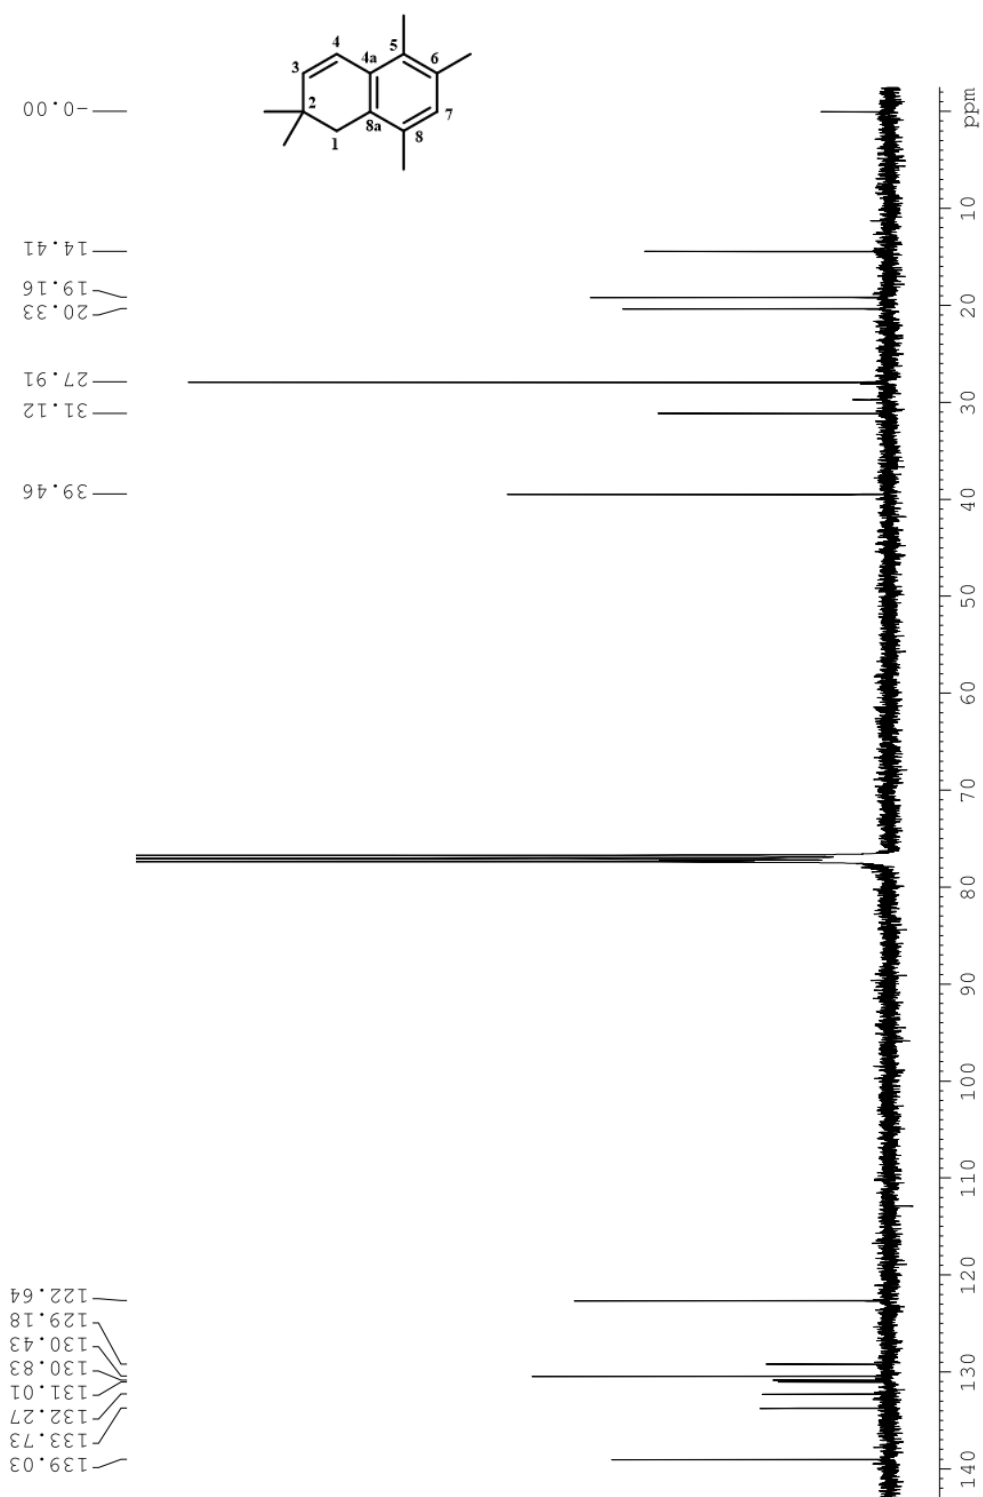

**Figure S46.**  $^{13}\text{C}\{^1\text{H}\}$  NMR spectrum of **3** (CDCl<sub>3</sub>, 100 MHz).

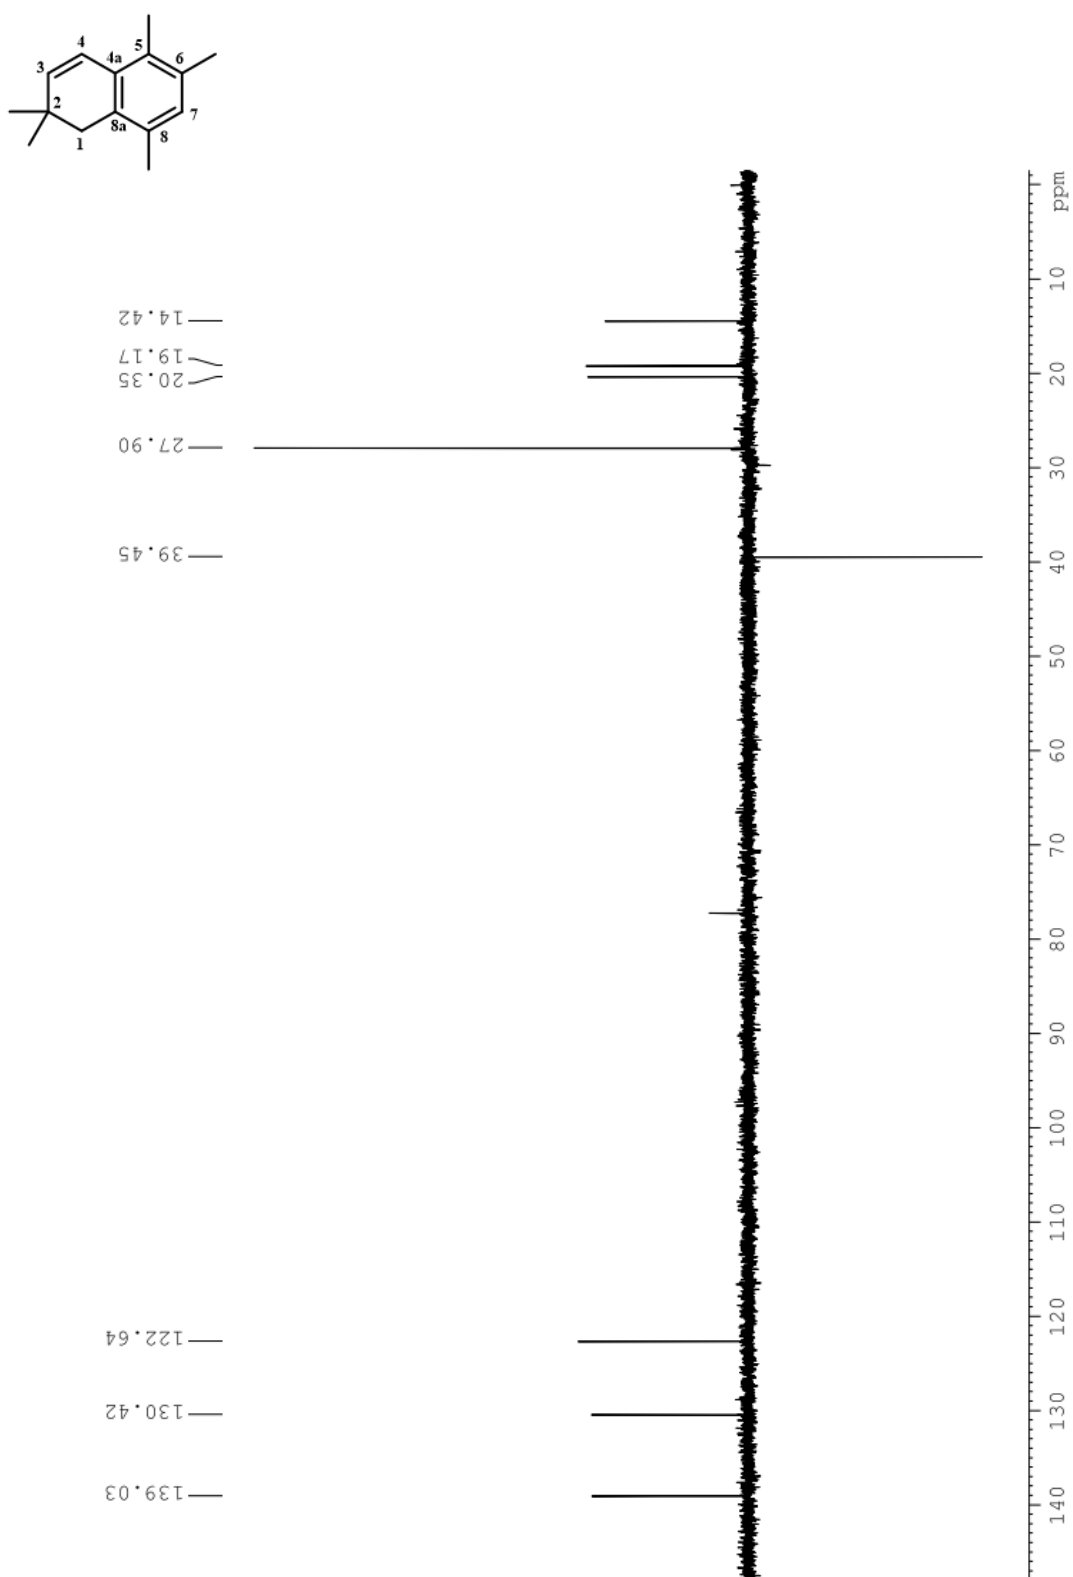

**Figure S47.** DEPT-135 spectrum of **3** (CDCl<sub>3</sub>, 100 MHz).

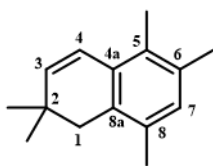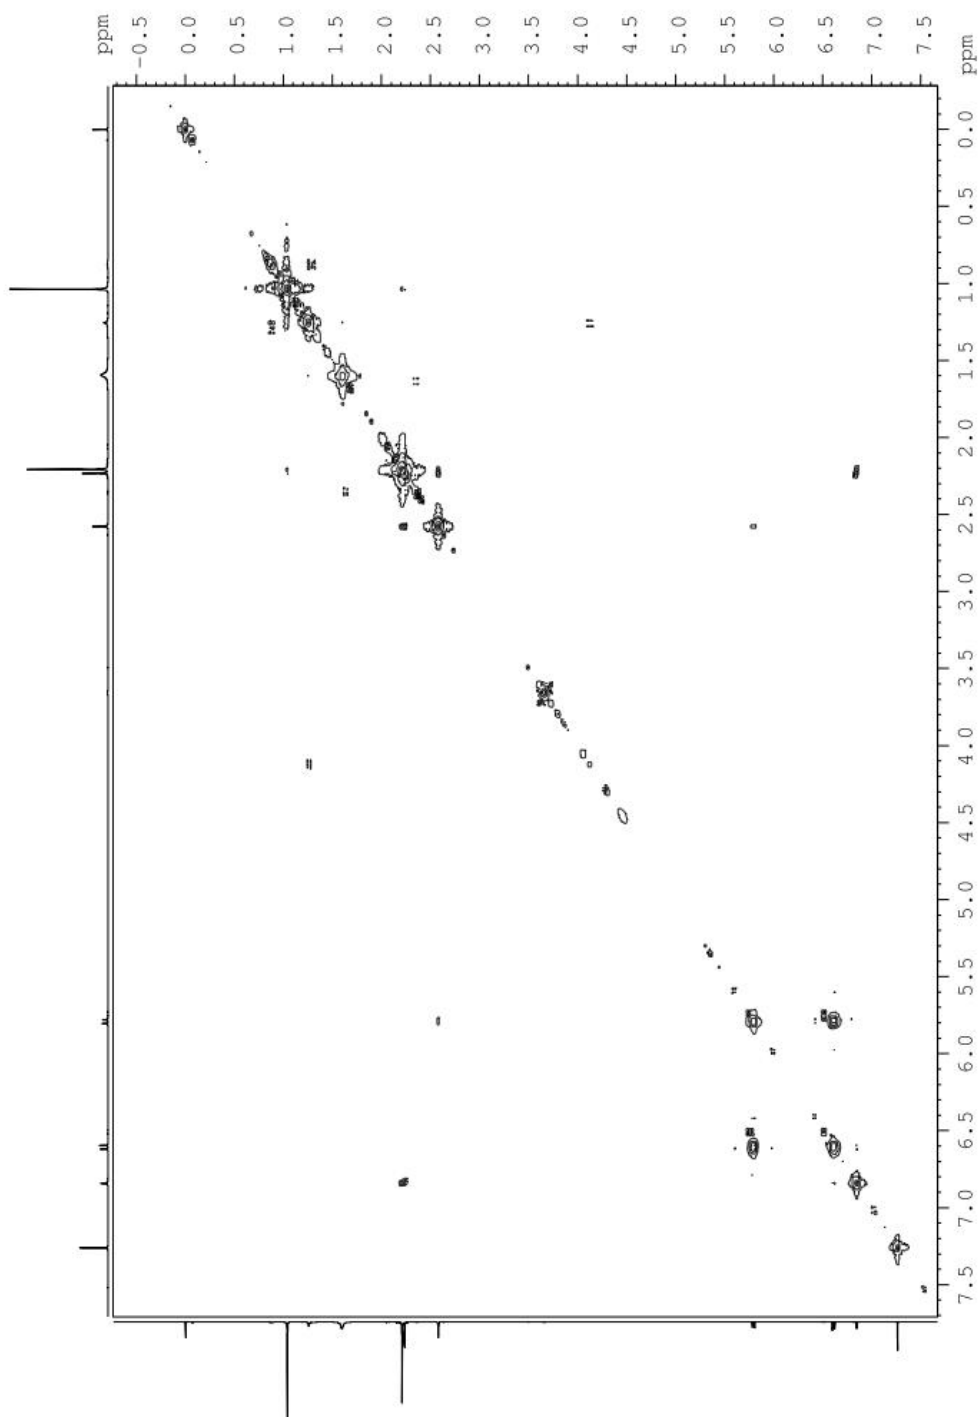

**Figure S48.** <sup>1</sup>H-<sup>1</sup>H COSY of **3** (CDCl<sub>3</sub>, 400 MHz).

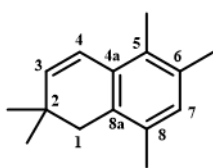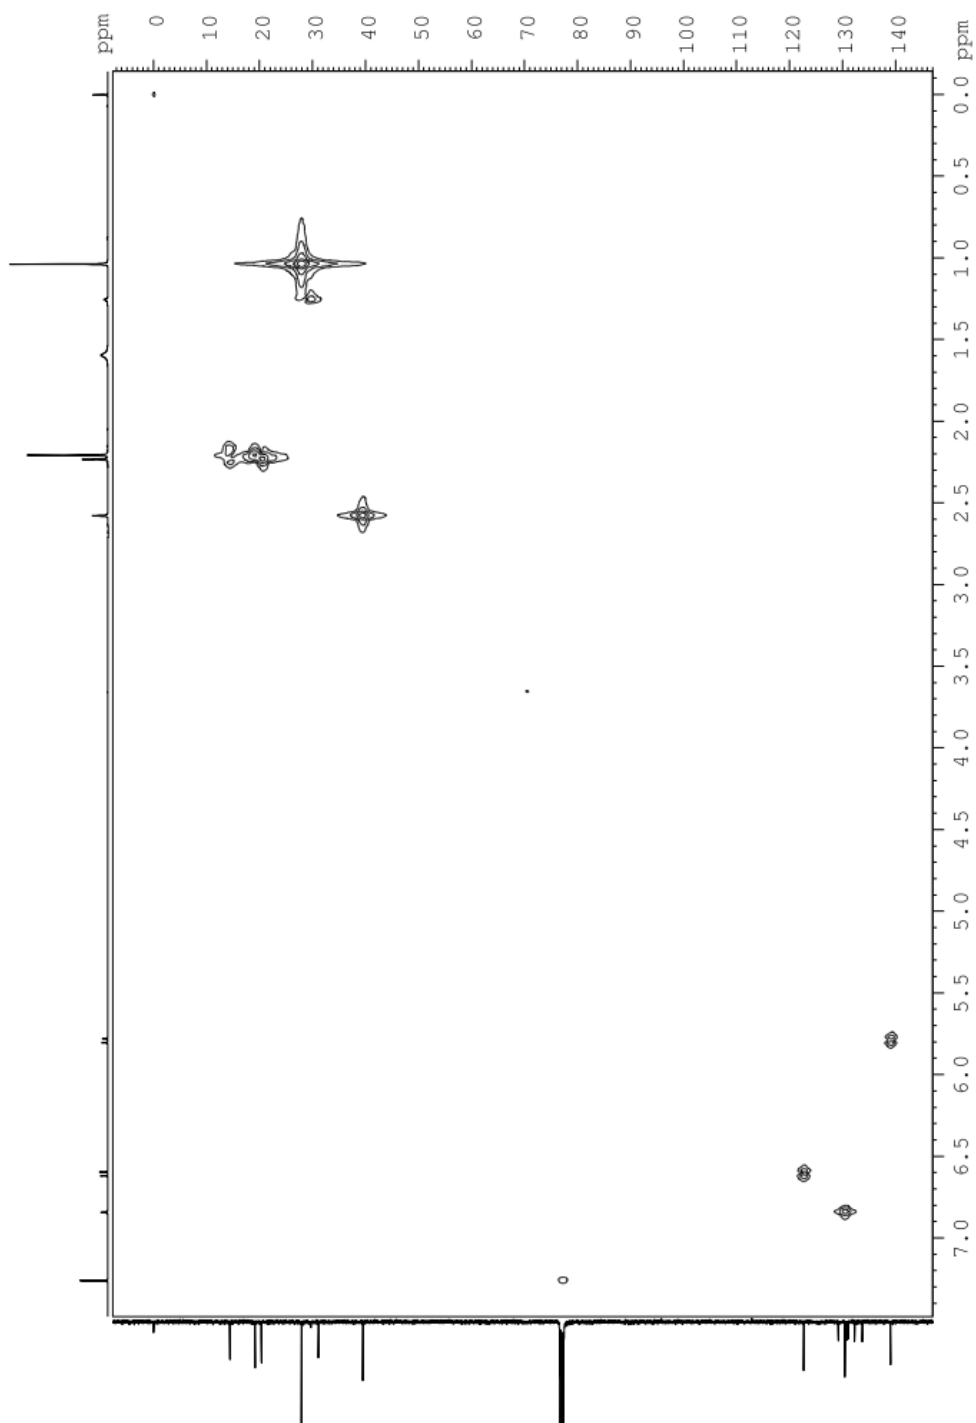

**Figure S49.**  $^1\text{H}$ - $^{13}\text{C}$  HMQC of **3** ( $\text{CDCl}_3$ , 400 MHz).

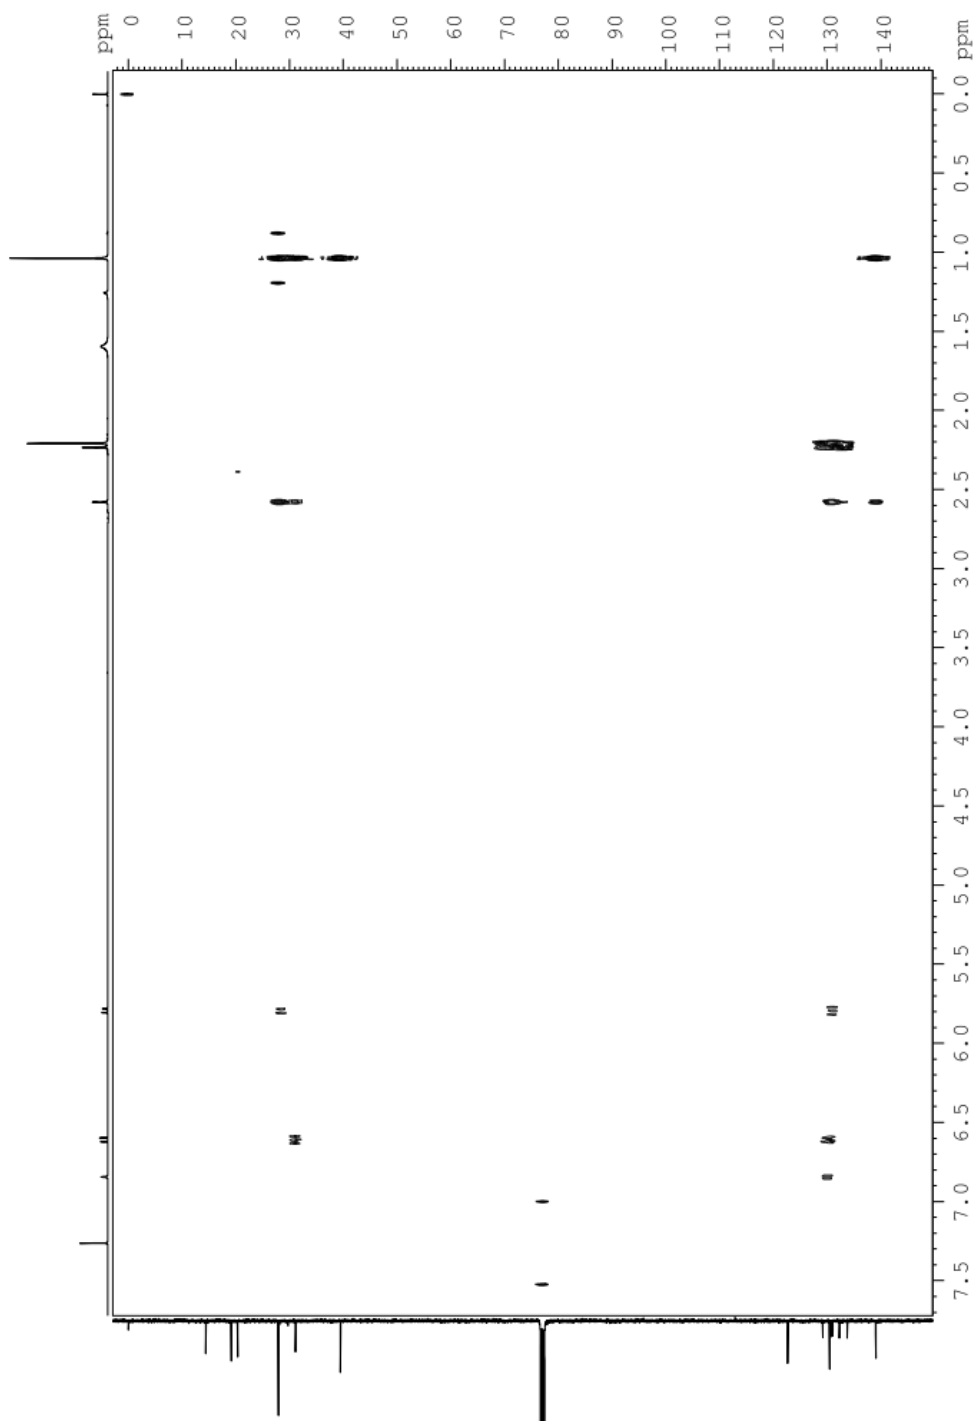

**Figure S50.**  $^1\text{H}$ - $^{13}\text{C}$  HMBC of **3** ( $\text{CDCl}_3$ , 400 MHz).

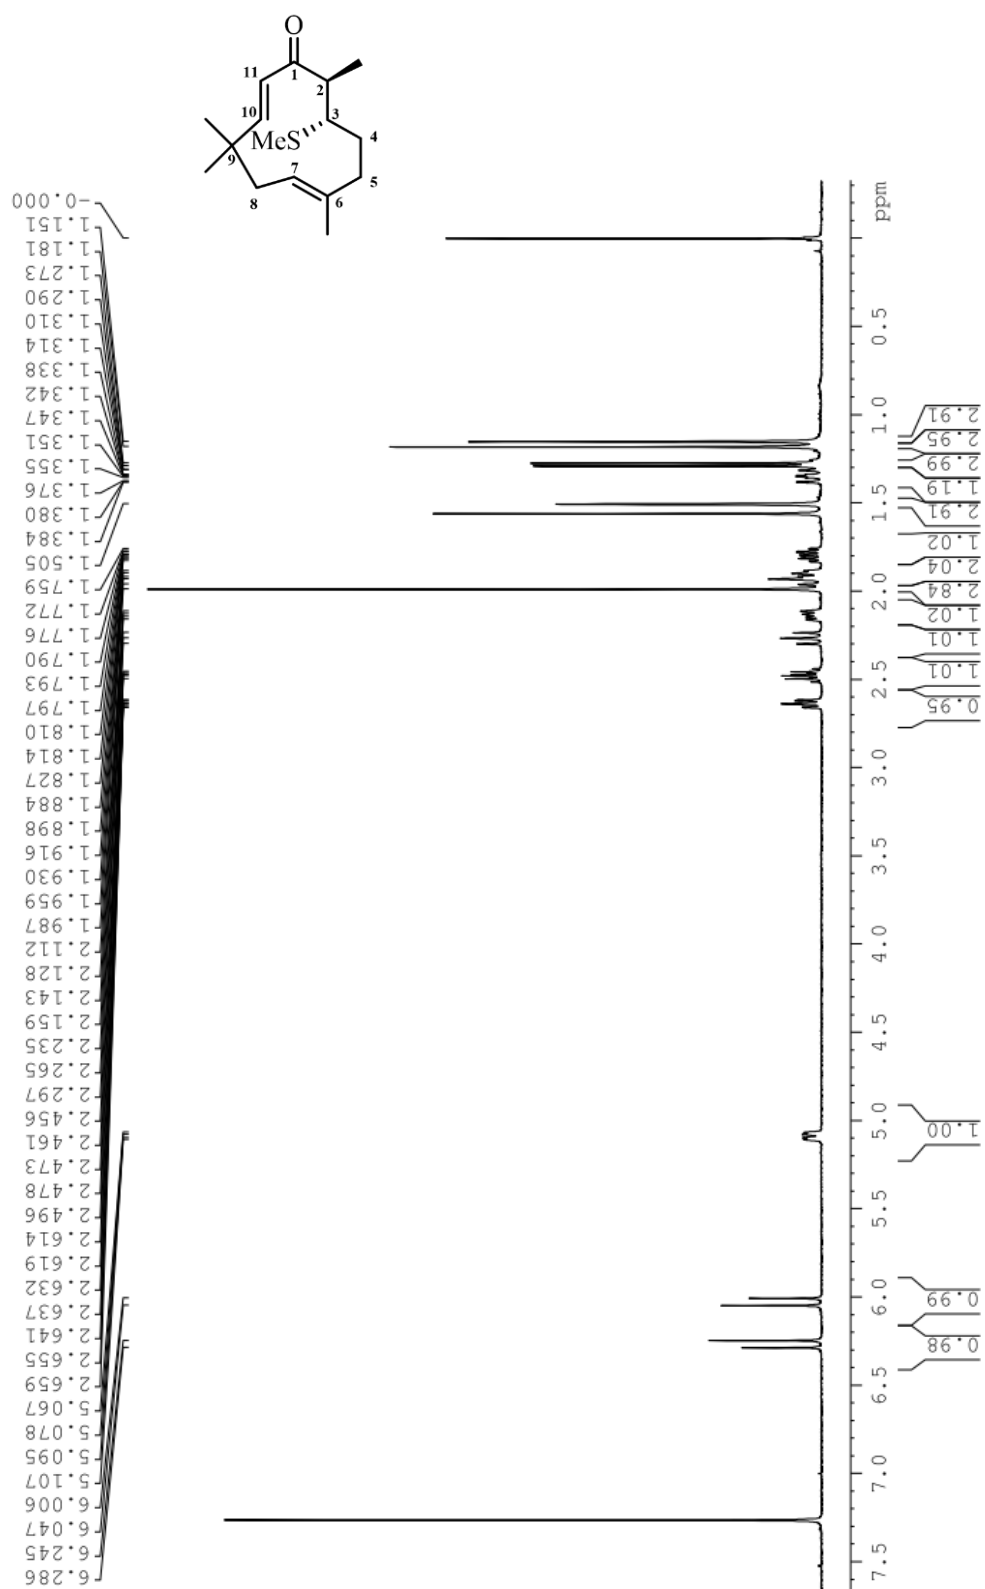

**Figure S51.** <sup>1</sup>H NMR spectrum of (2*RS*,3*SR*)-11 (CDCl<sub>3</sub>, 400 MHz).



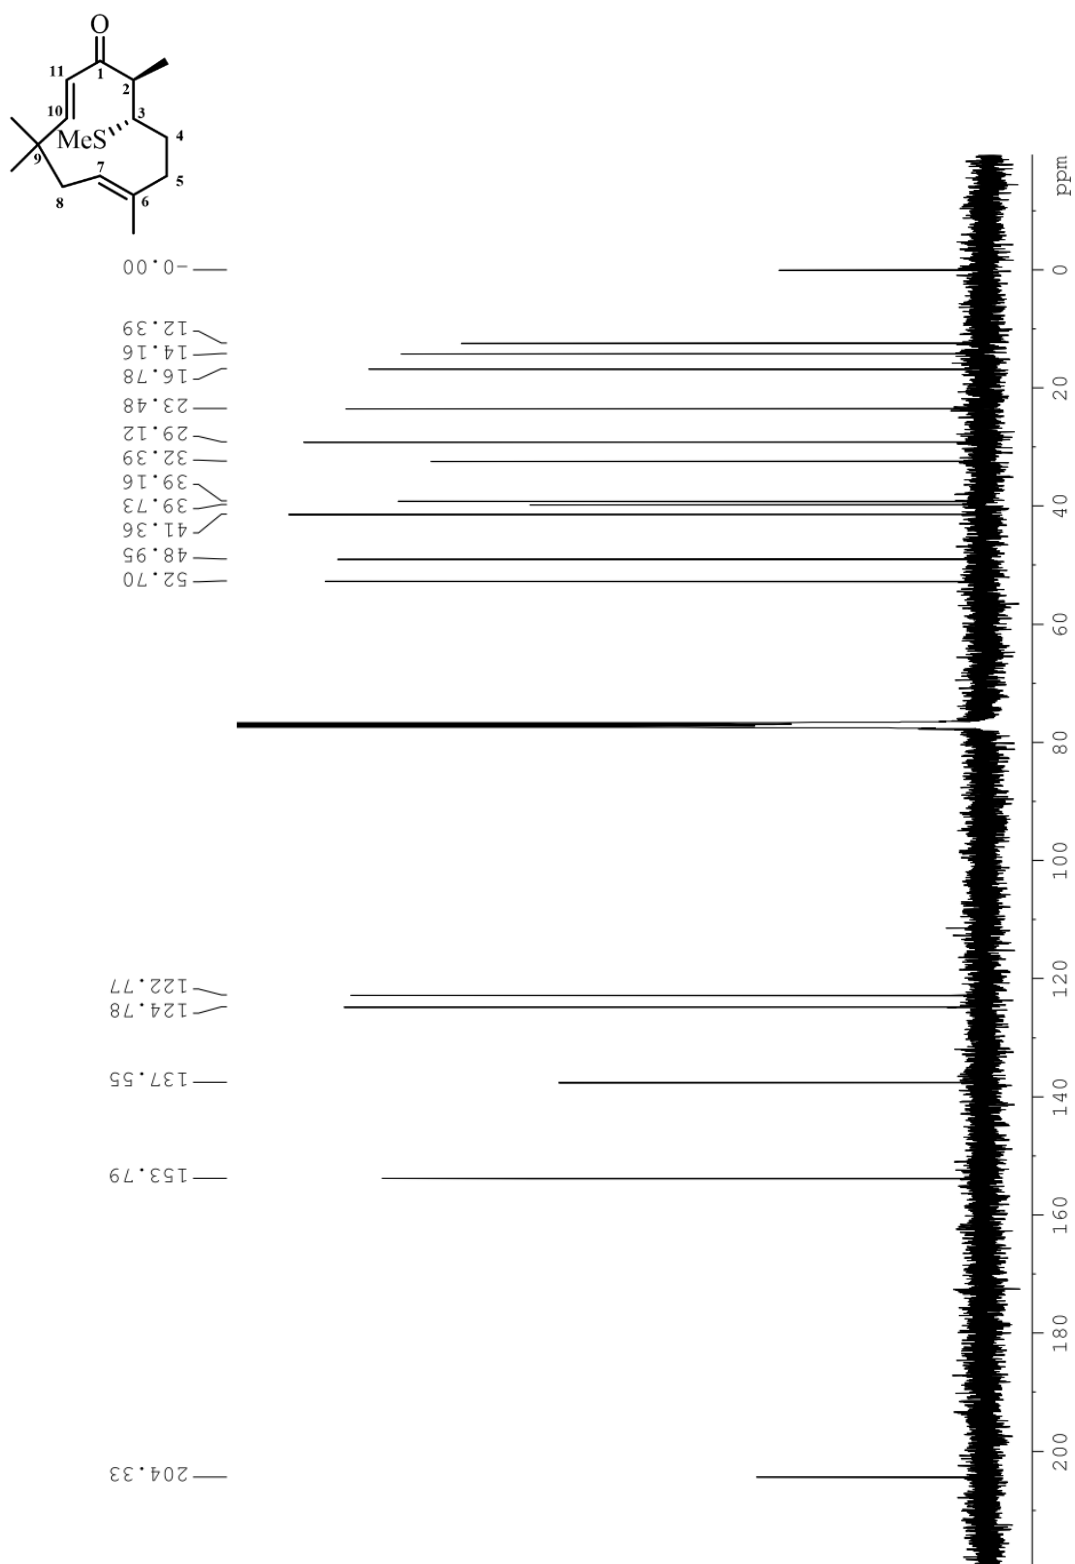

**Figure S52.**  $^{13}\text{C}\{^1\text{H}\}$  NMR spectrum of (2*RS*,3*SR*)-11 ( $\text{CDCl}_3$ , 100 MHz).

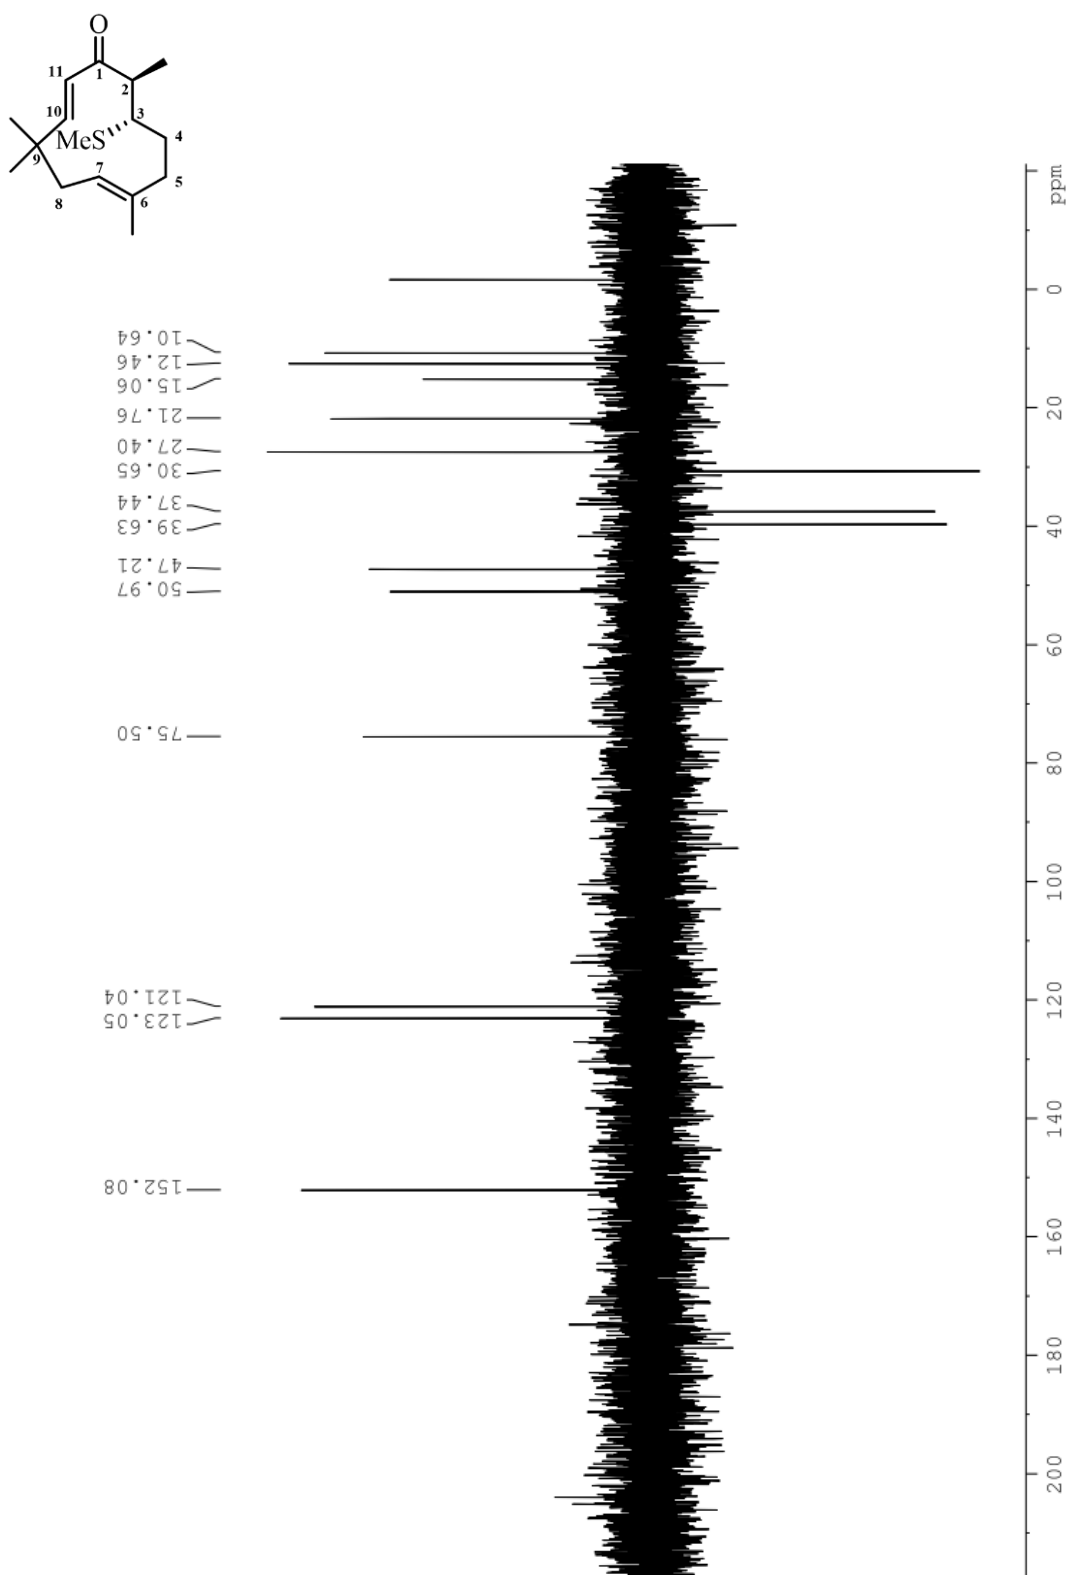

**Figure S53.** DEPT-135 spectrum of (2*RS*,3*SR*)-11 (CDCl<sub>3</sub>, 100 MHz).

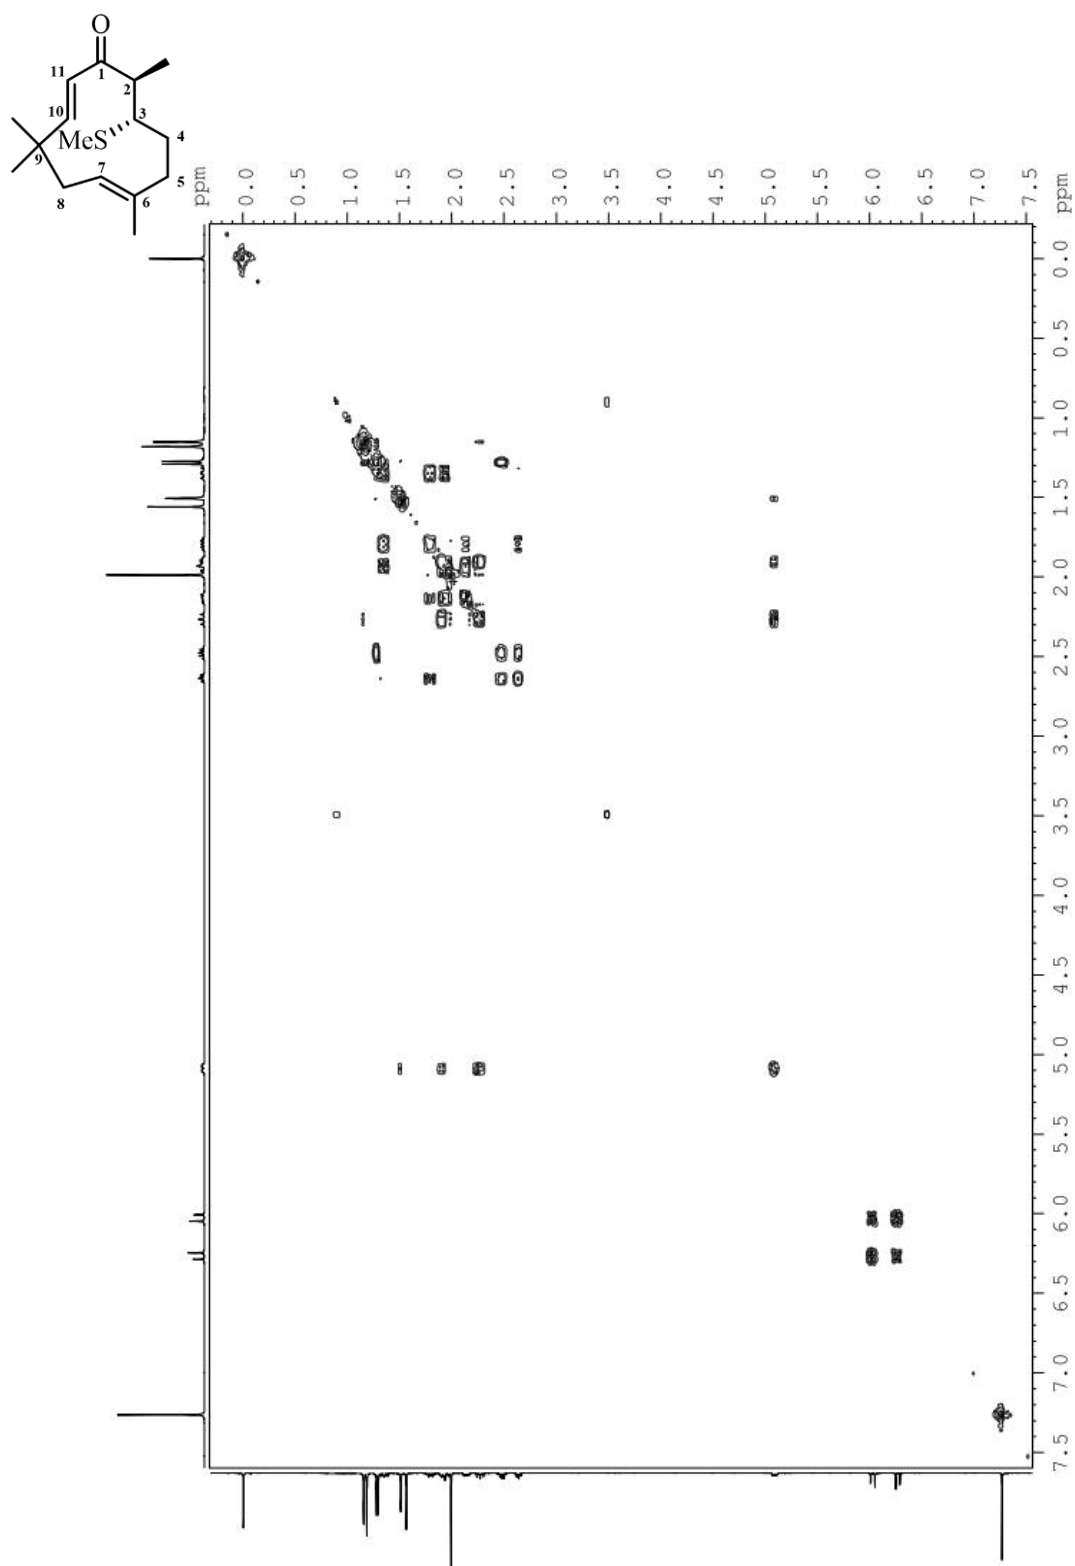

**Figure S54.**  $^1\text{H}$ - $^1\text{H}$  COSY of **(2*RS*,3*SR*)-11** ( $\text{CDCl}_3$ , 400 MHz).

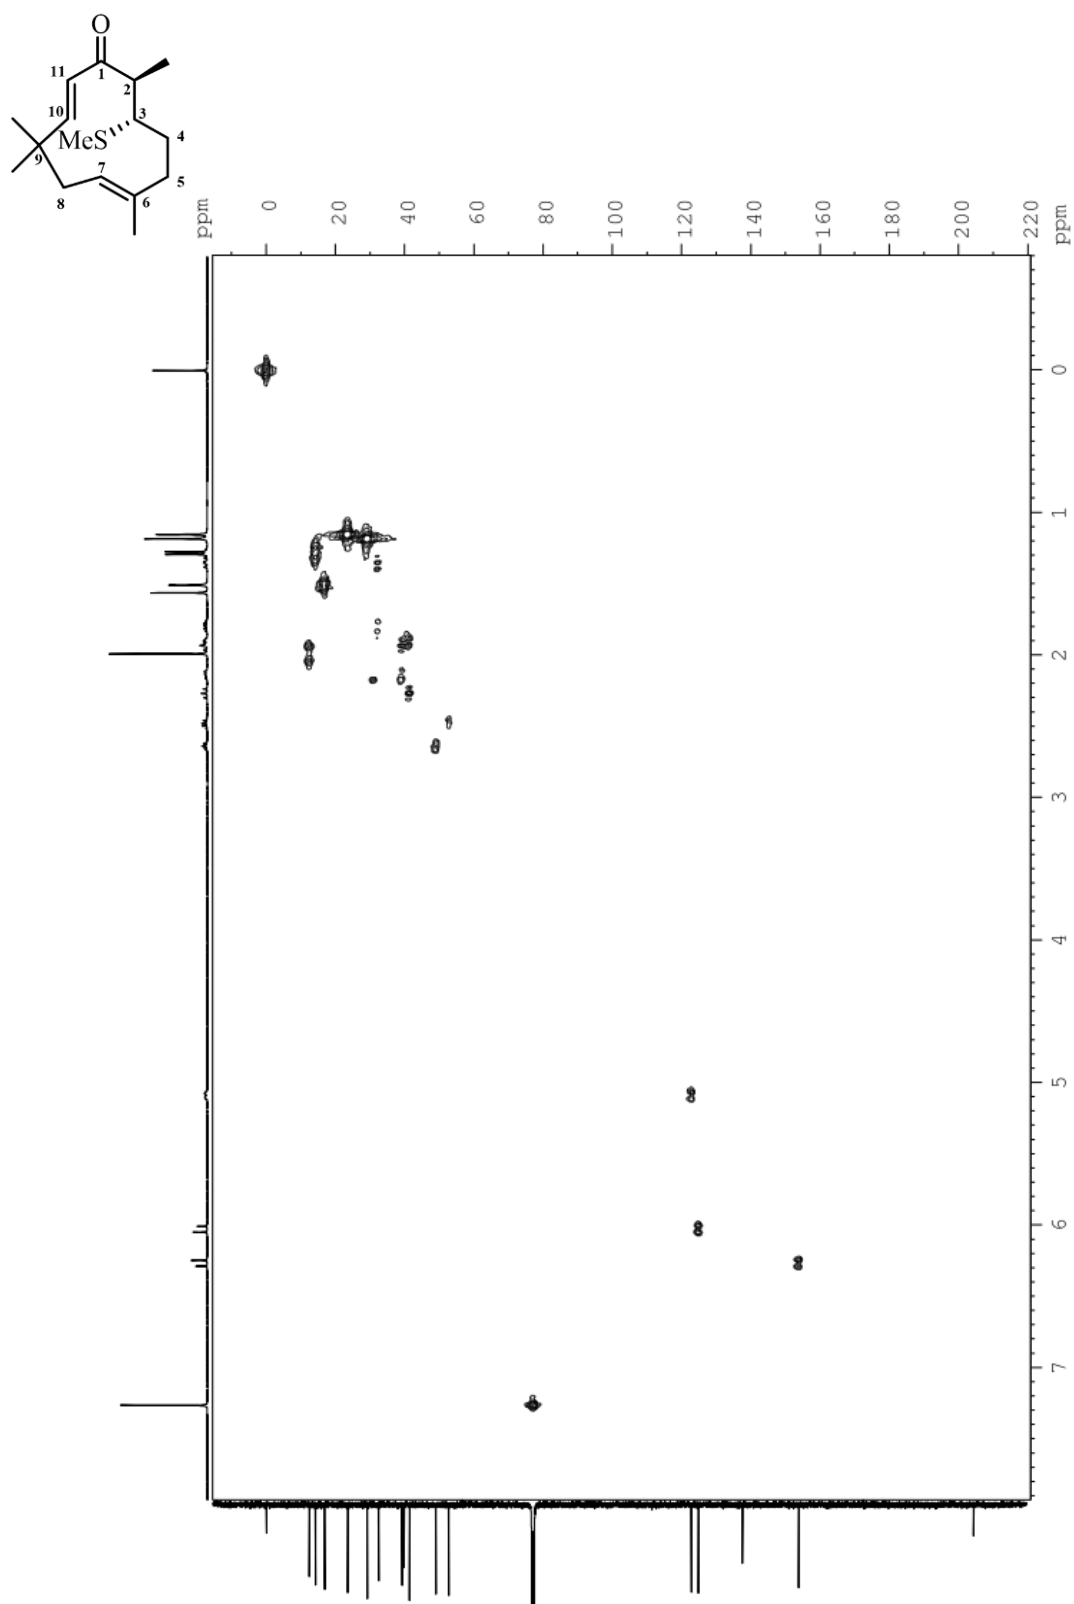

**Figure S55.**  $^1\text{H}$ - $^{13}\text{C}$  HMQC of **(2RS,3SR)-11** ( $\text{CDCl}_3$ , 400 MHz).

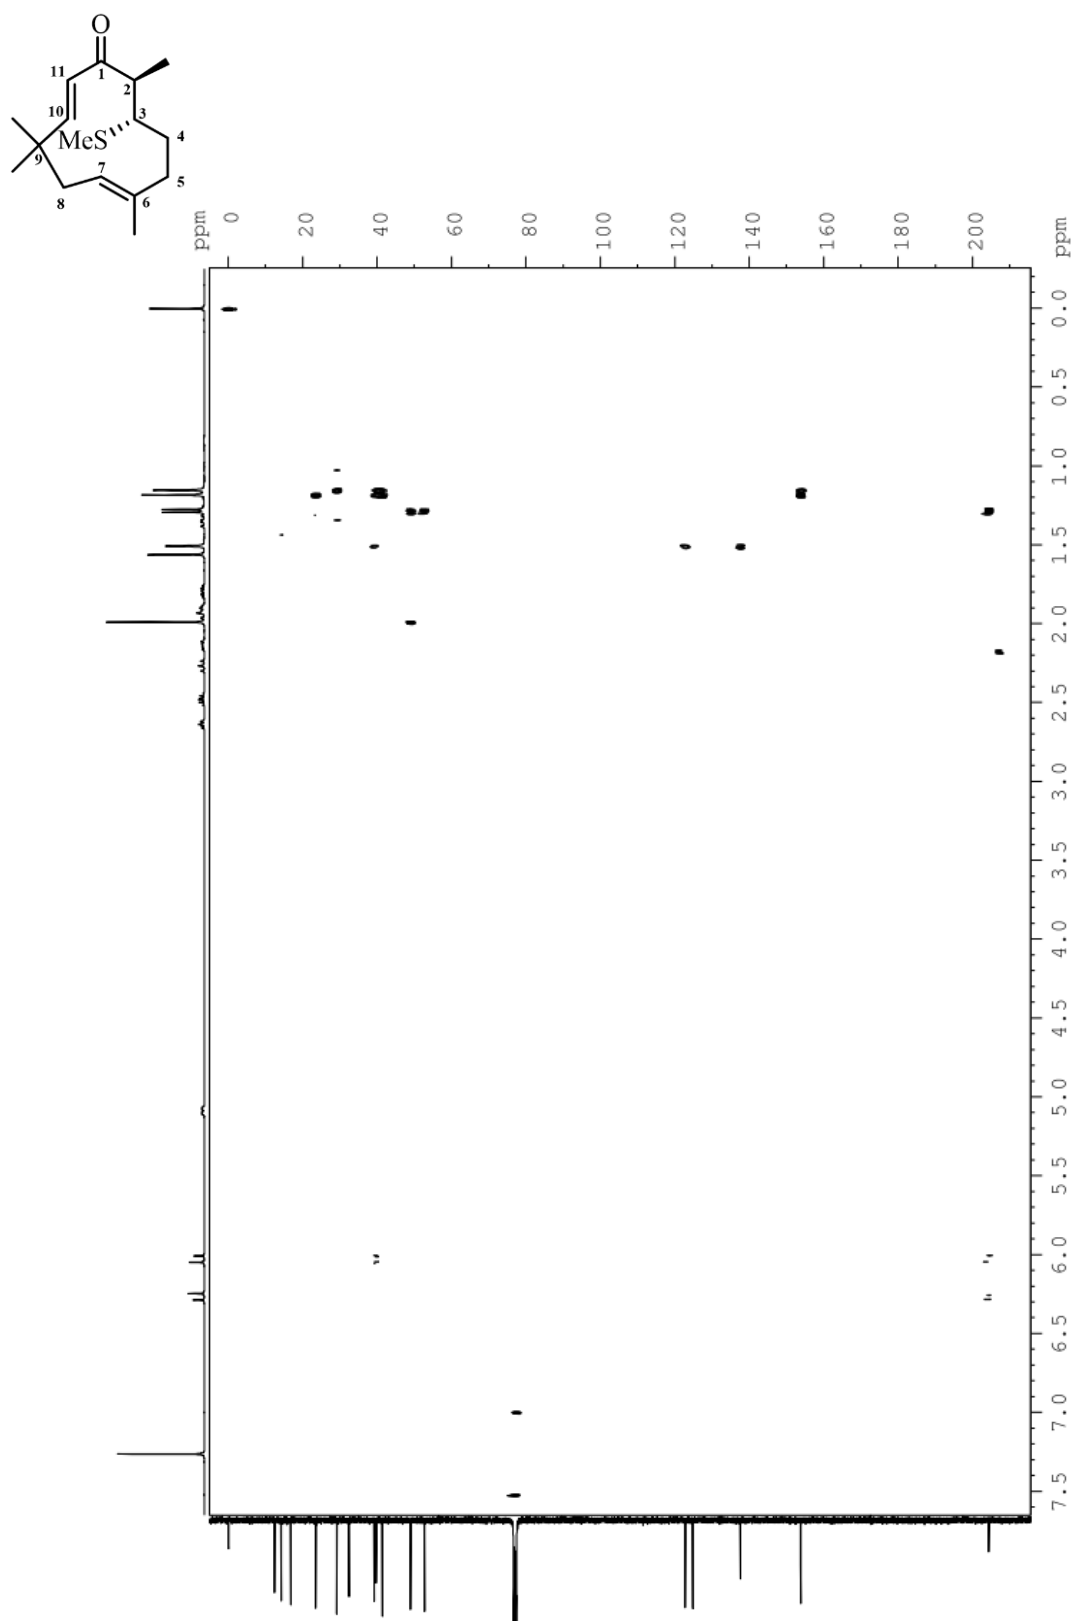

**Figure S56.**  $^1\text{H}$ - $^{13}\text{C}$  HMBC of **(2RS,3SR)-11** ( $\text{CDCl}_3$ , 400 MHz).

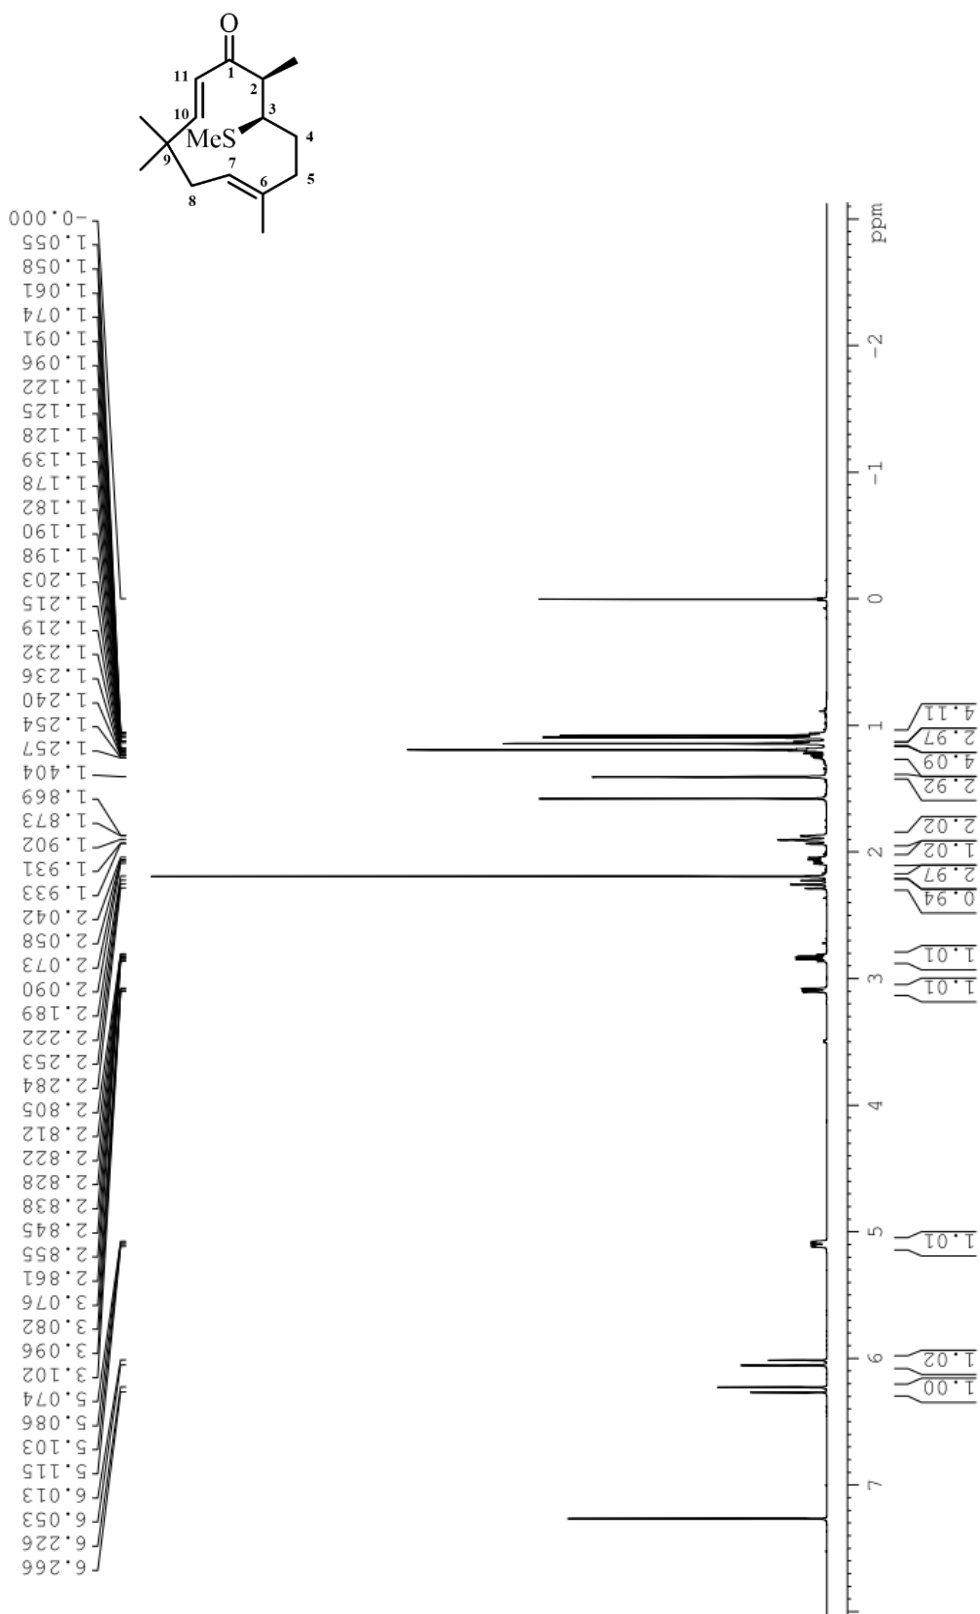

**Figure S57.** <sup>1</sup>H NMR spectrum of (2*RS*,3*RS*)-11 (CDCl<sub>3</sub>, 400 MHz).

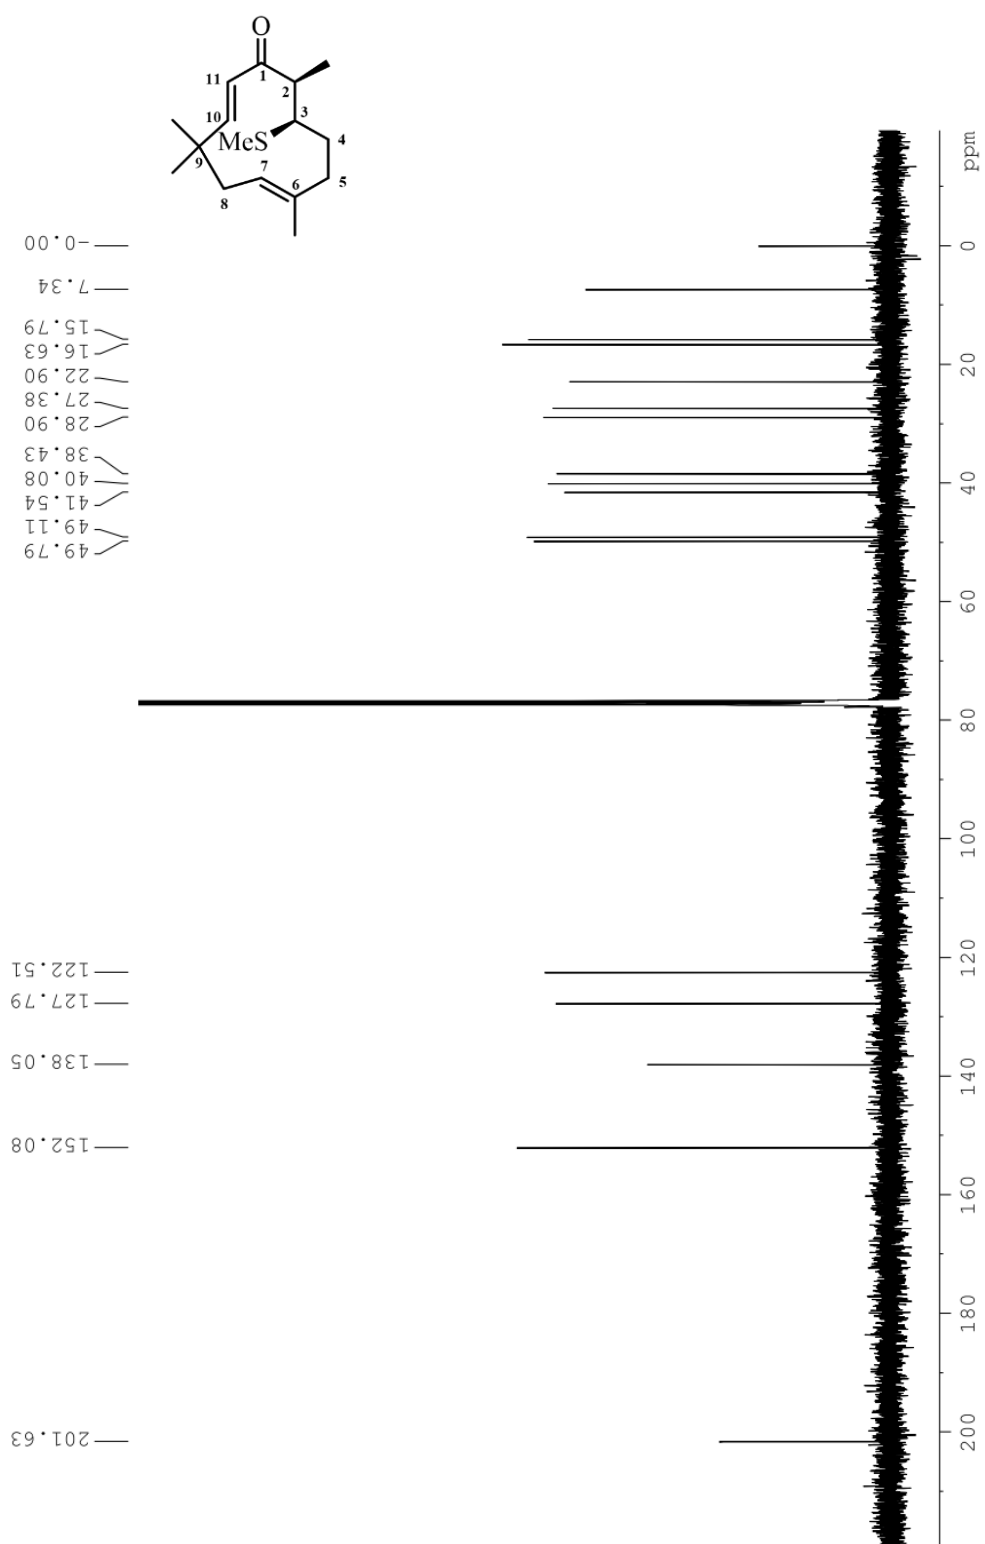

**Figure S58.**  $^{13}\text{C}\{^1\text{H}\}$  NMR spectrum of (2*RS*,3*RS*)-11 ( $\text{CDCl}_3$ , 100 MHz).

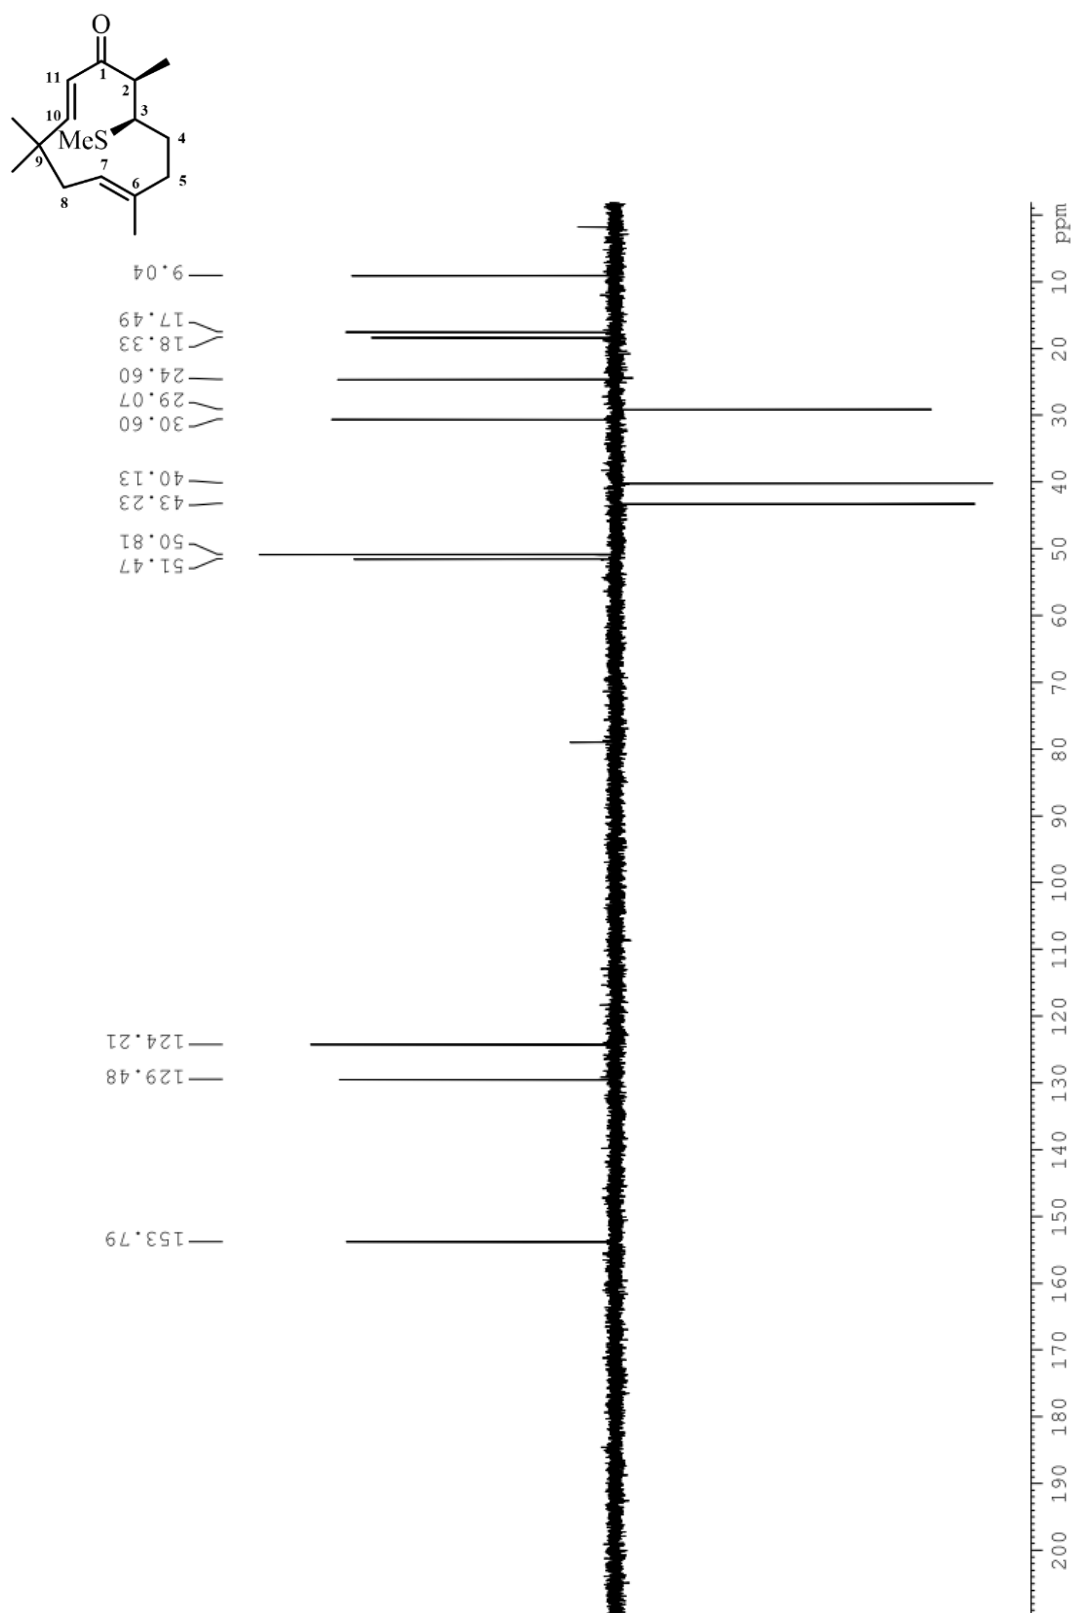

**Figure S59.** DEPT-135 spectrum of (2*RS*,3*RS*)-11 (CDCl<sub>3</sub>, 100 MHz).



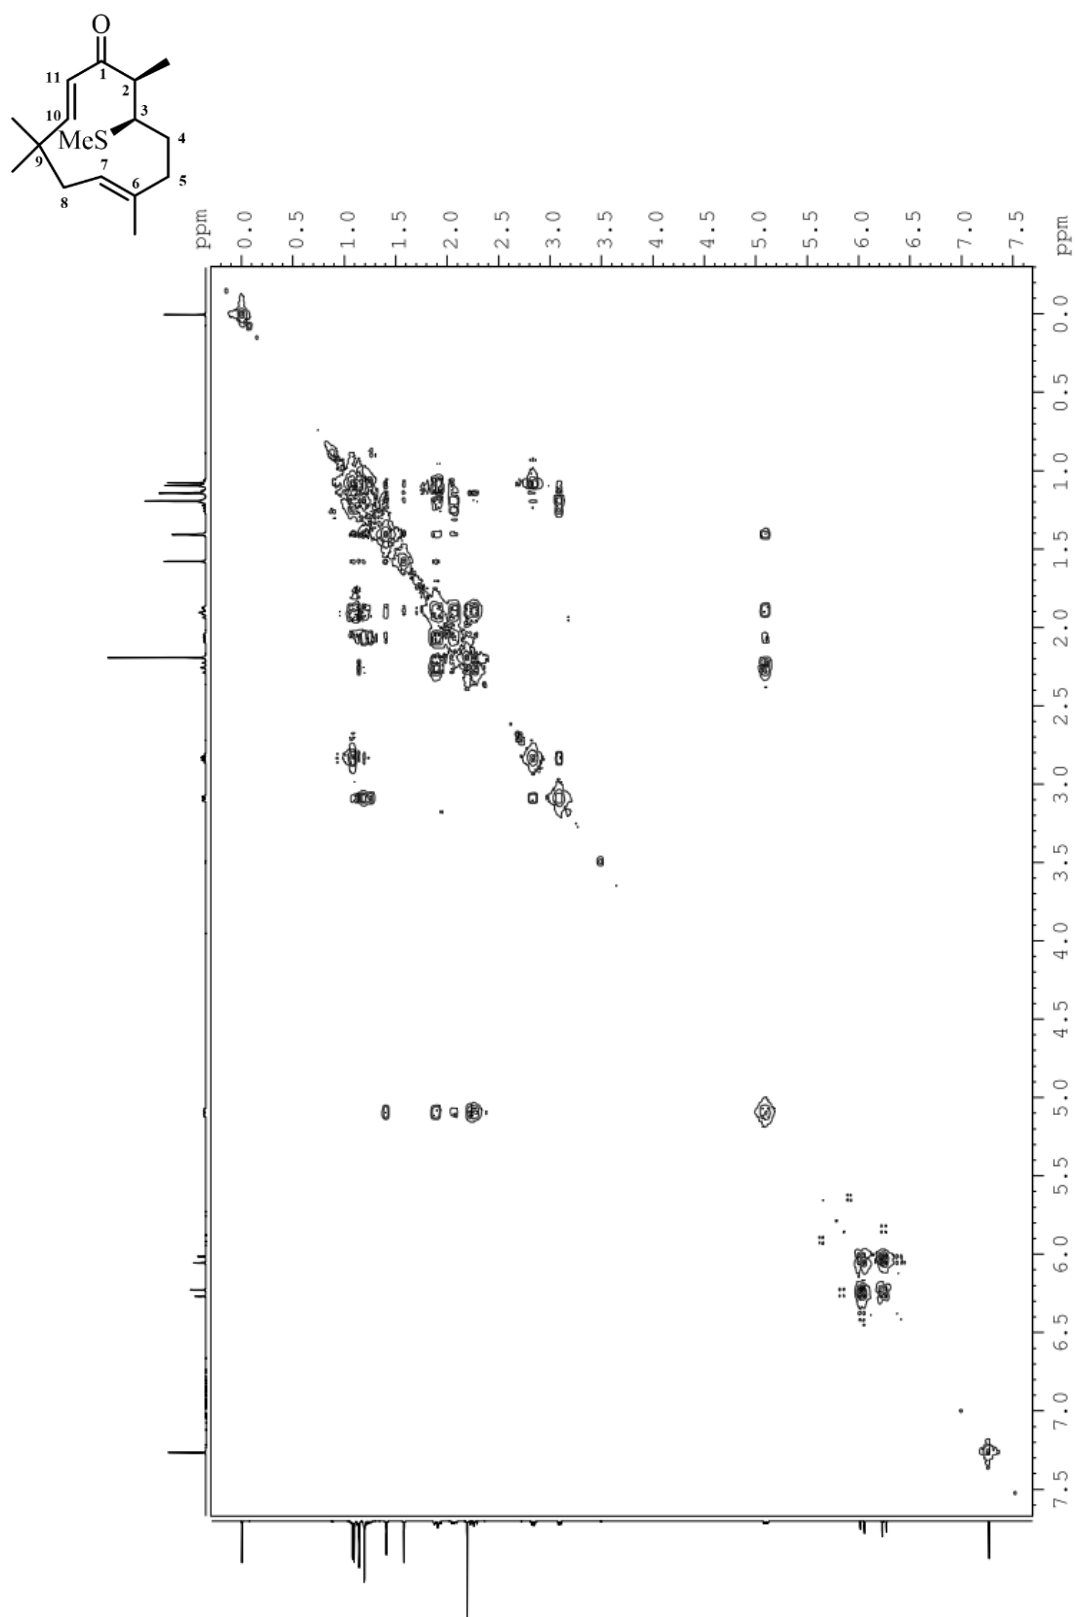

**Figure S60.**  $^1\text{H}$ - $^1\text{H}$  COSY of (2*RS*,3*RS*)-11 ( $\text{CDCl}_3$ , 400 MHz).

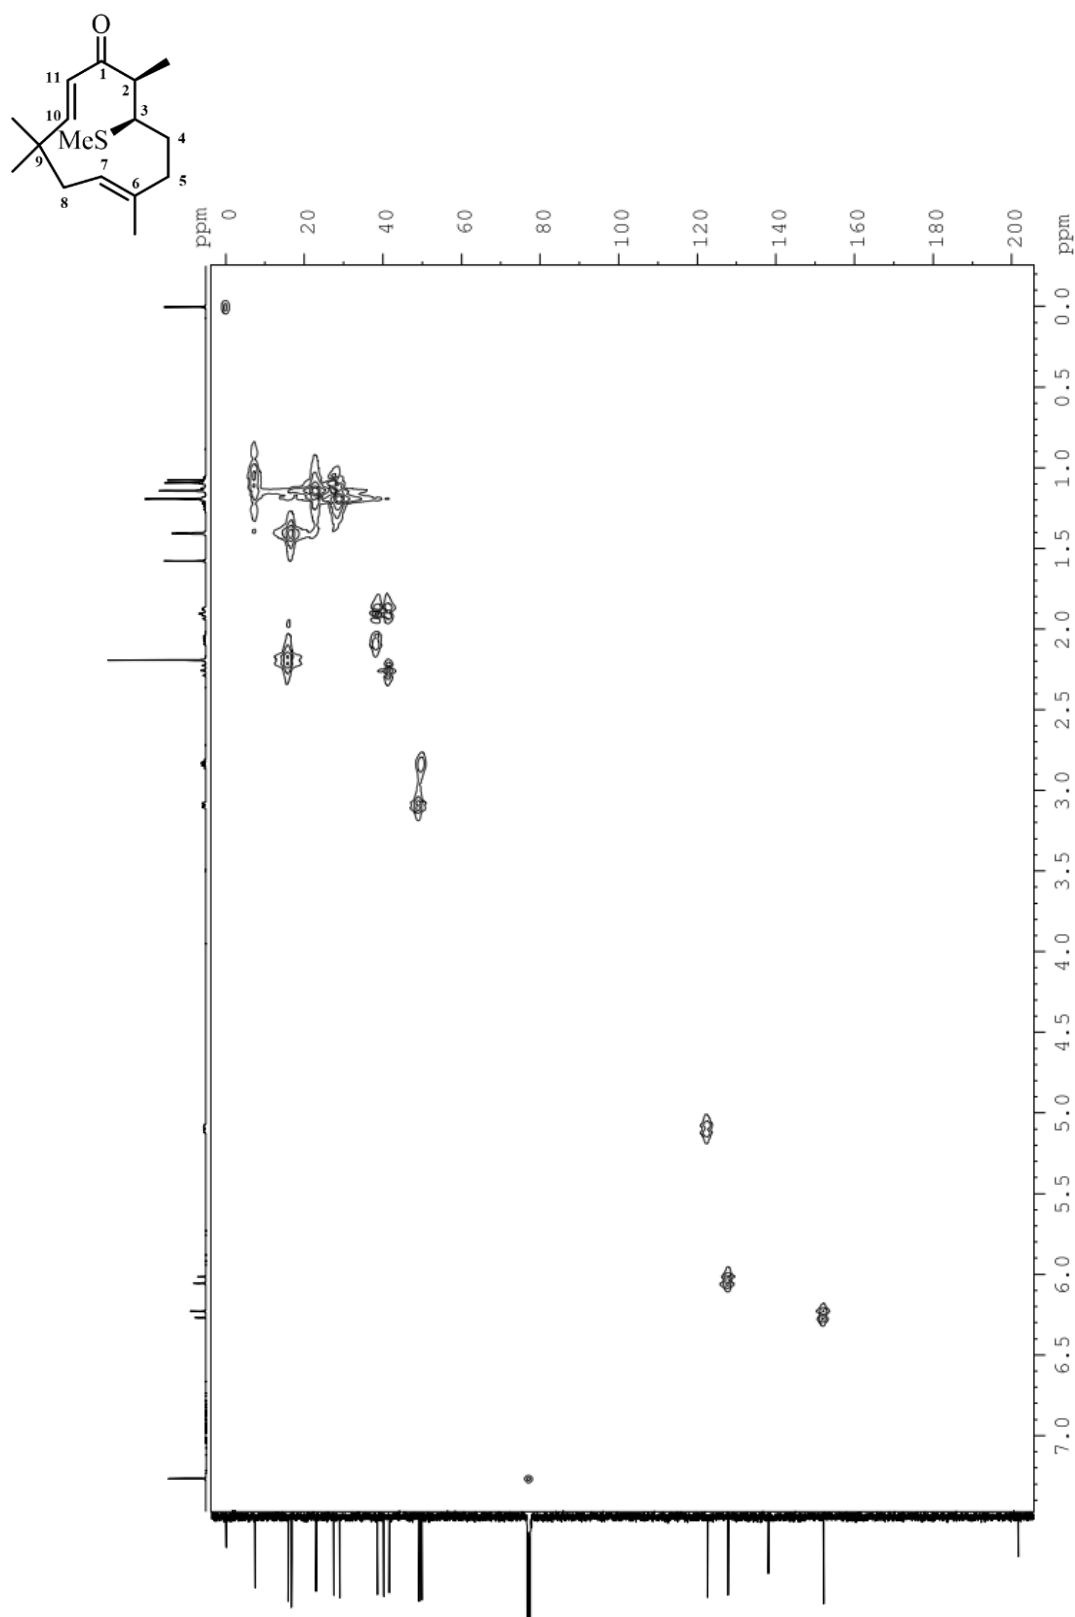

**Figure S61.**  $^1\text{H}$ - $^{13}\text{C}$  HMQC of **(2RS,3RS)-11** ( $\text{CDCl}_3$ , 400 MHz).

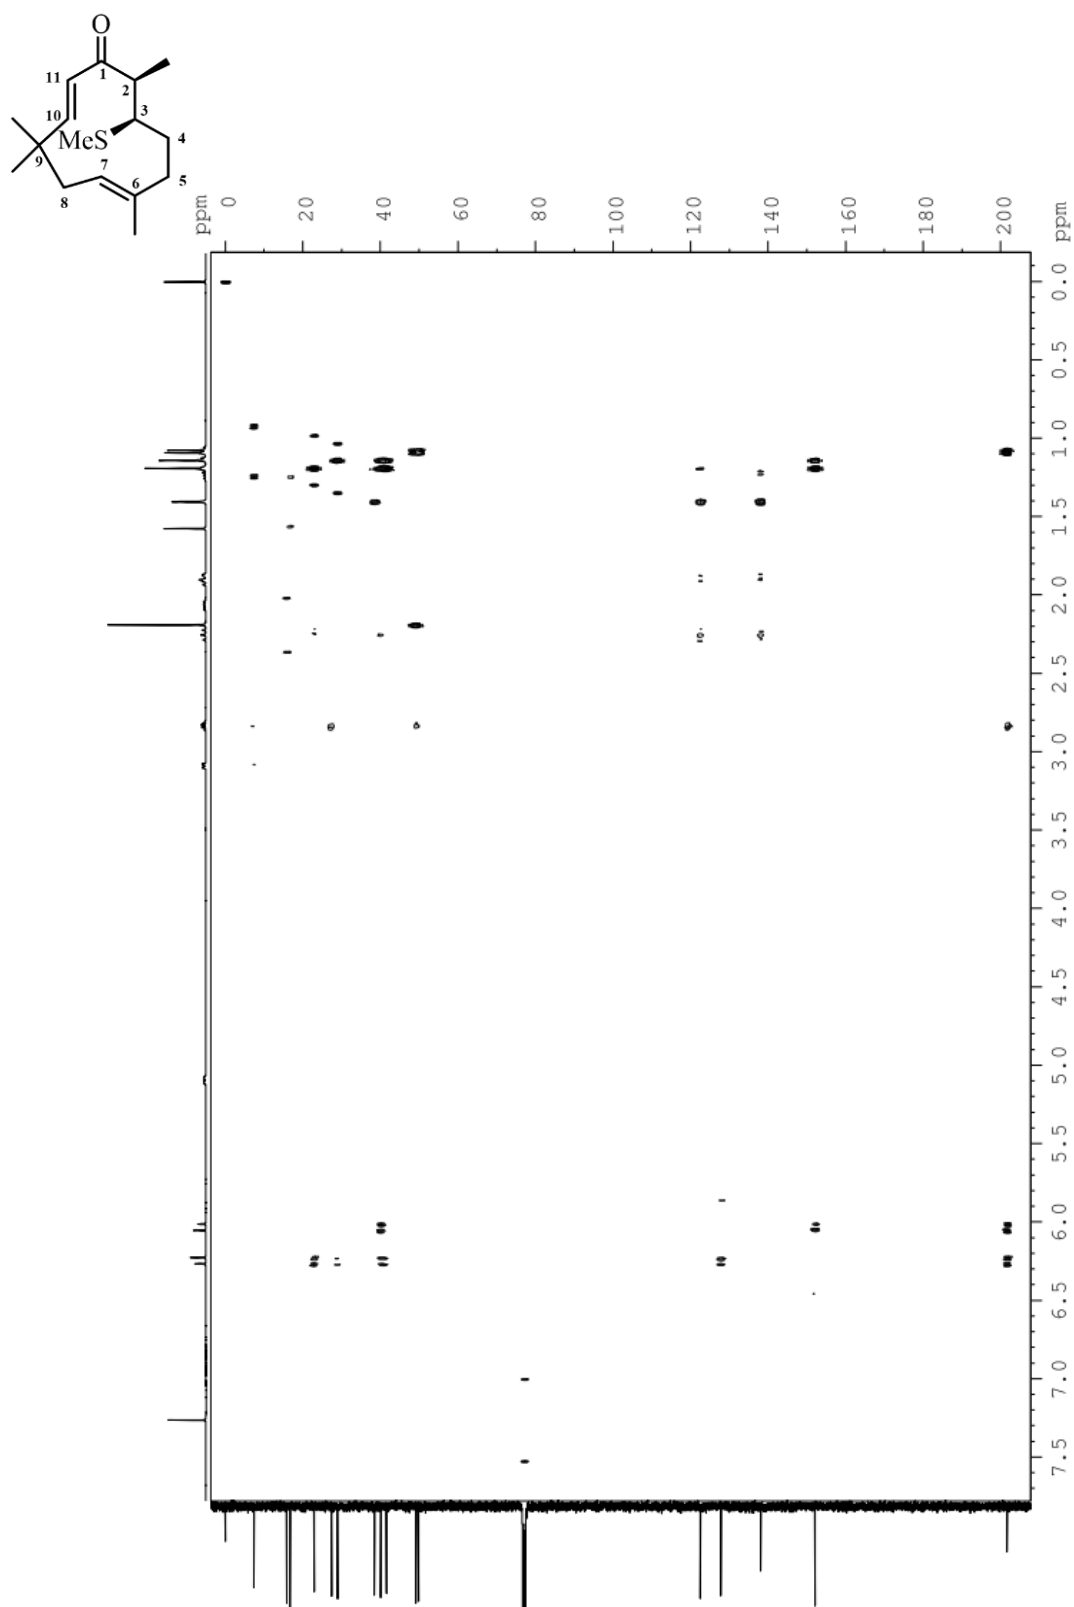

**Figure S62.**  $^1\text{H}$ - $^{13}\text{C}$  HMBC of (2*RS*,3*RS*)-11 ( $\text{CDCl}_3$ , 400 MHz).

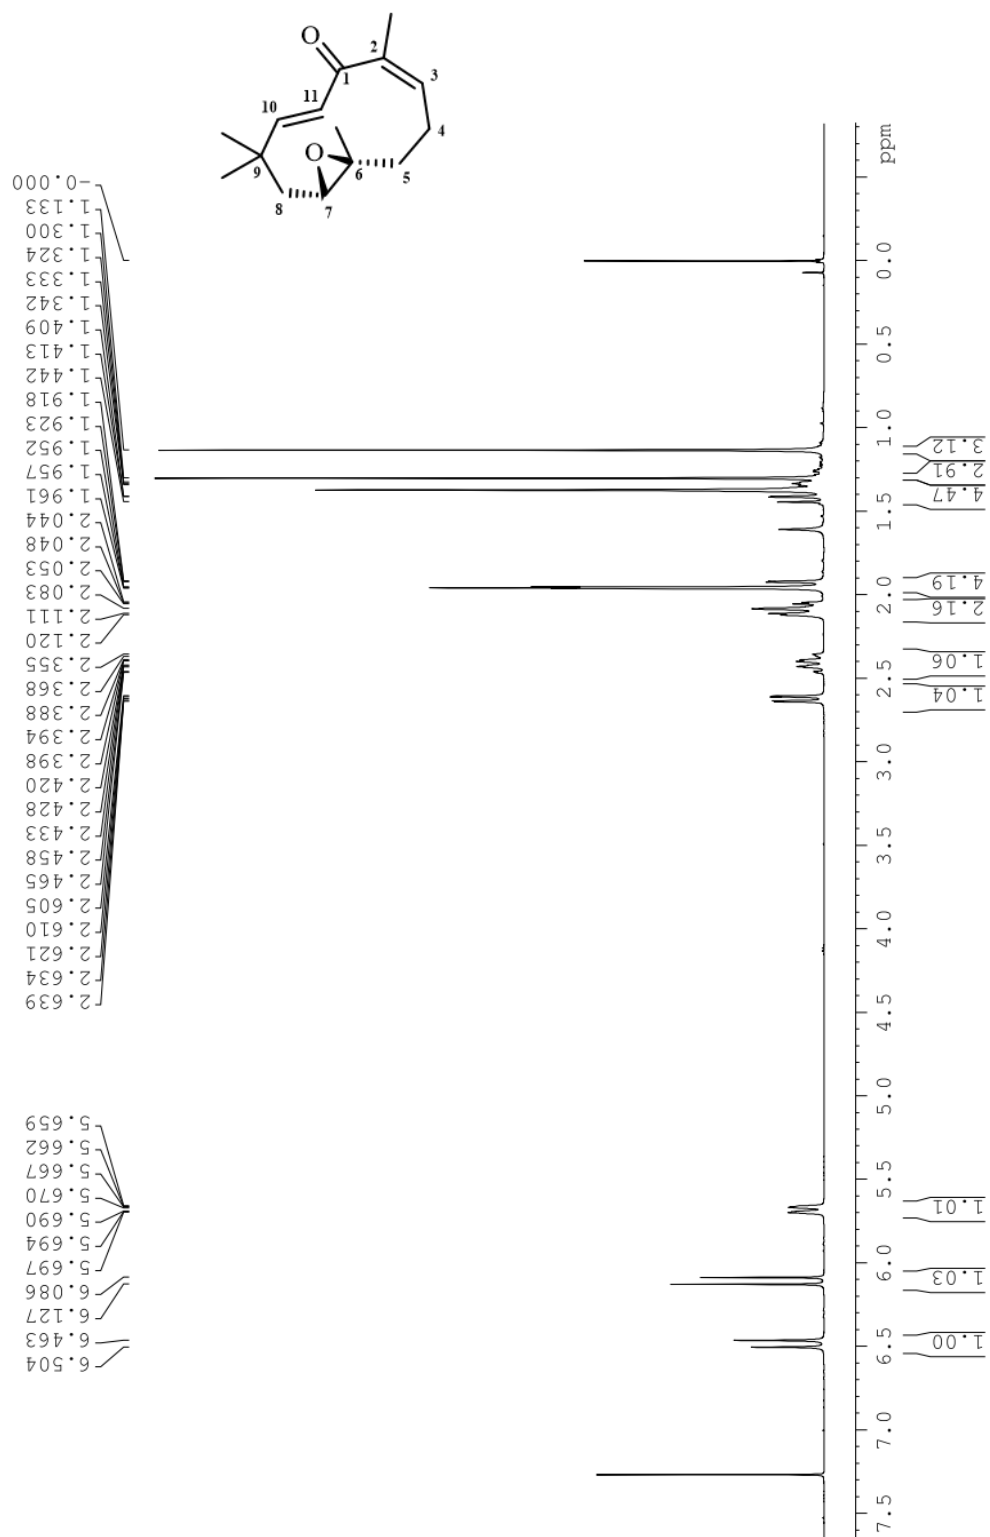

**Figure S63.** <sup>1</sup>H NMR spectrum of 12 (CDCl<sub>3</sub>, 400 MHz).

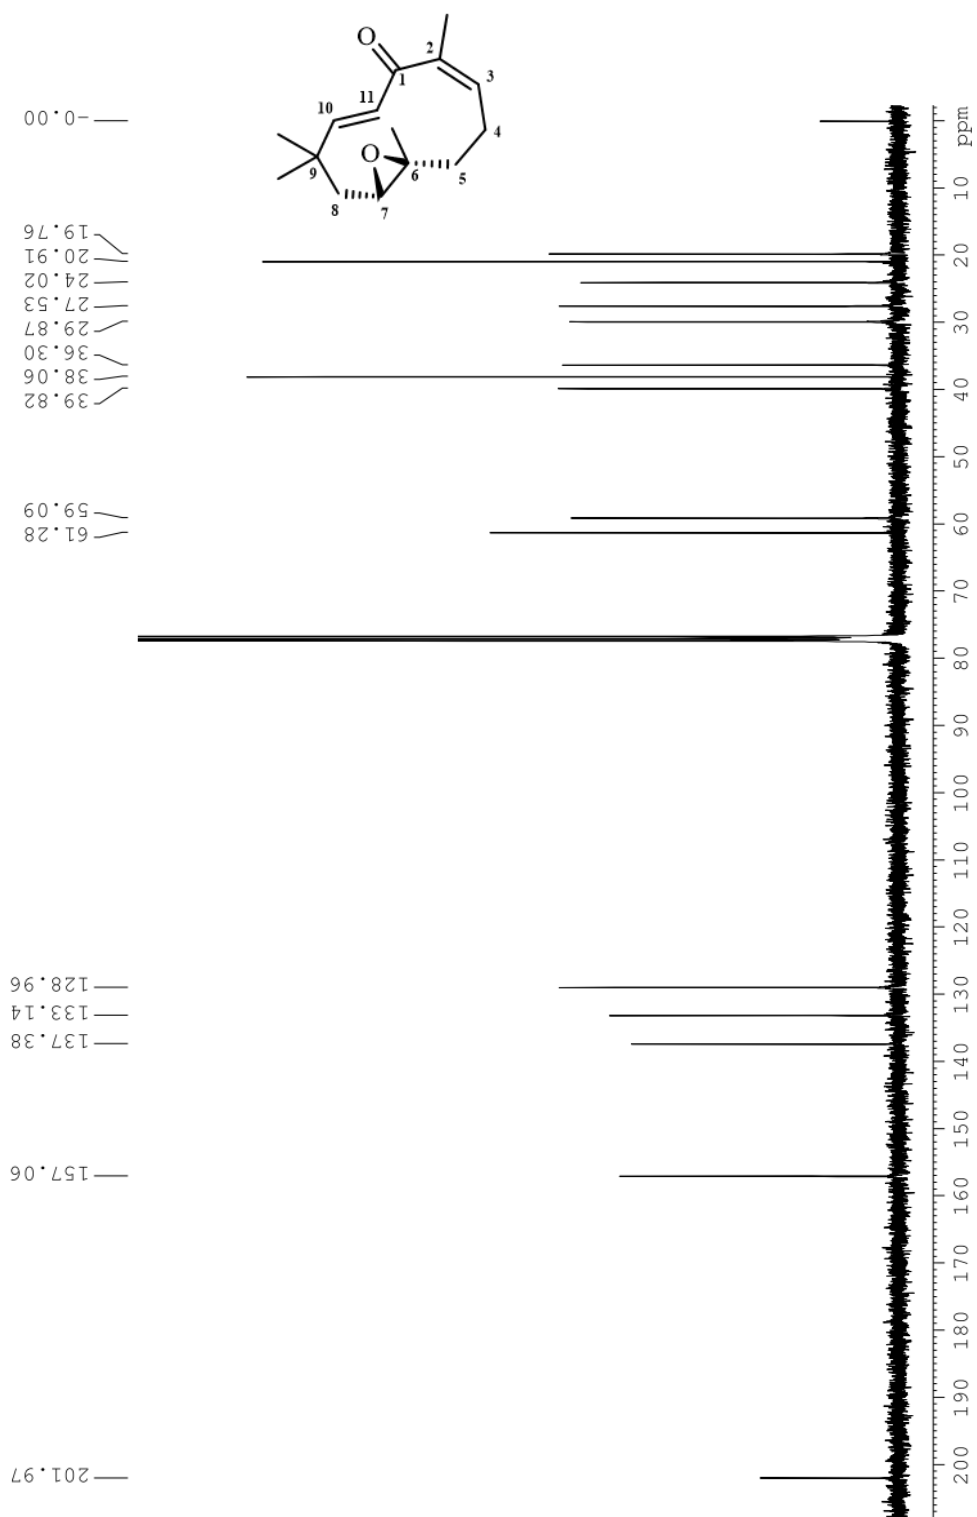

**Figure S64.**  $^{13}\text{C}\{^1\text{H}\}$  NMR spectrum of **12** ( $\text{CDCl}_3$ , 100 MHz).

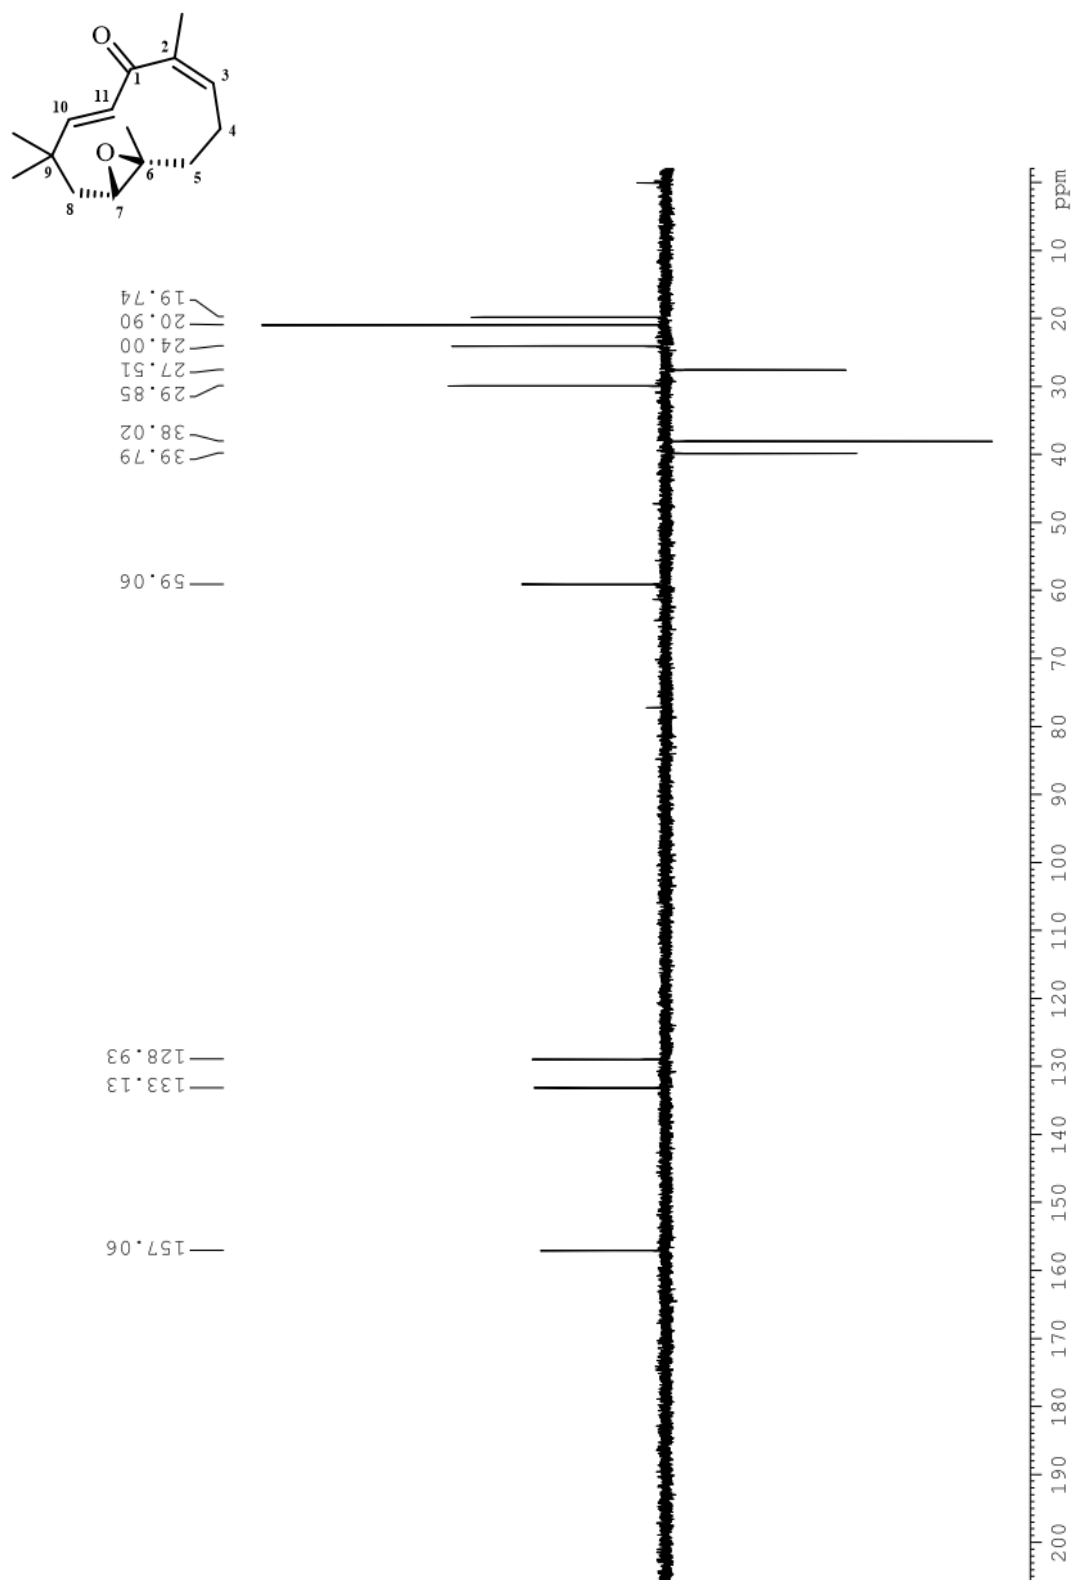

**Figure S65.** DEPT-135 spectrum of **12** (CDCl<sub>3</sub>, 100 MHz).

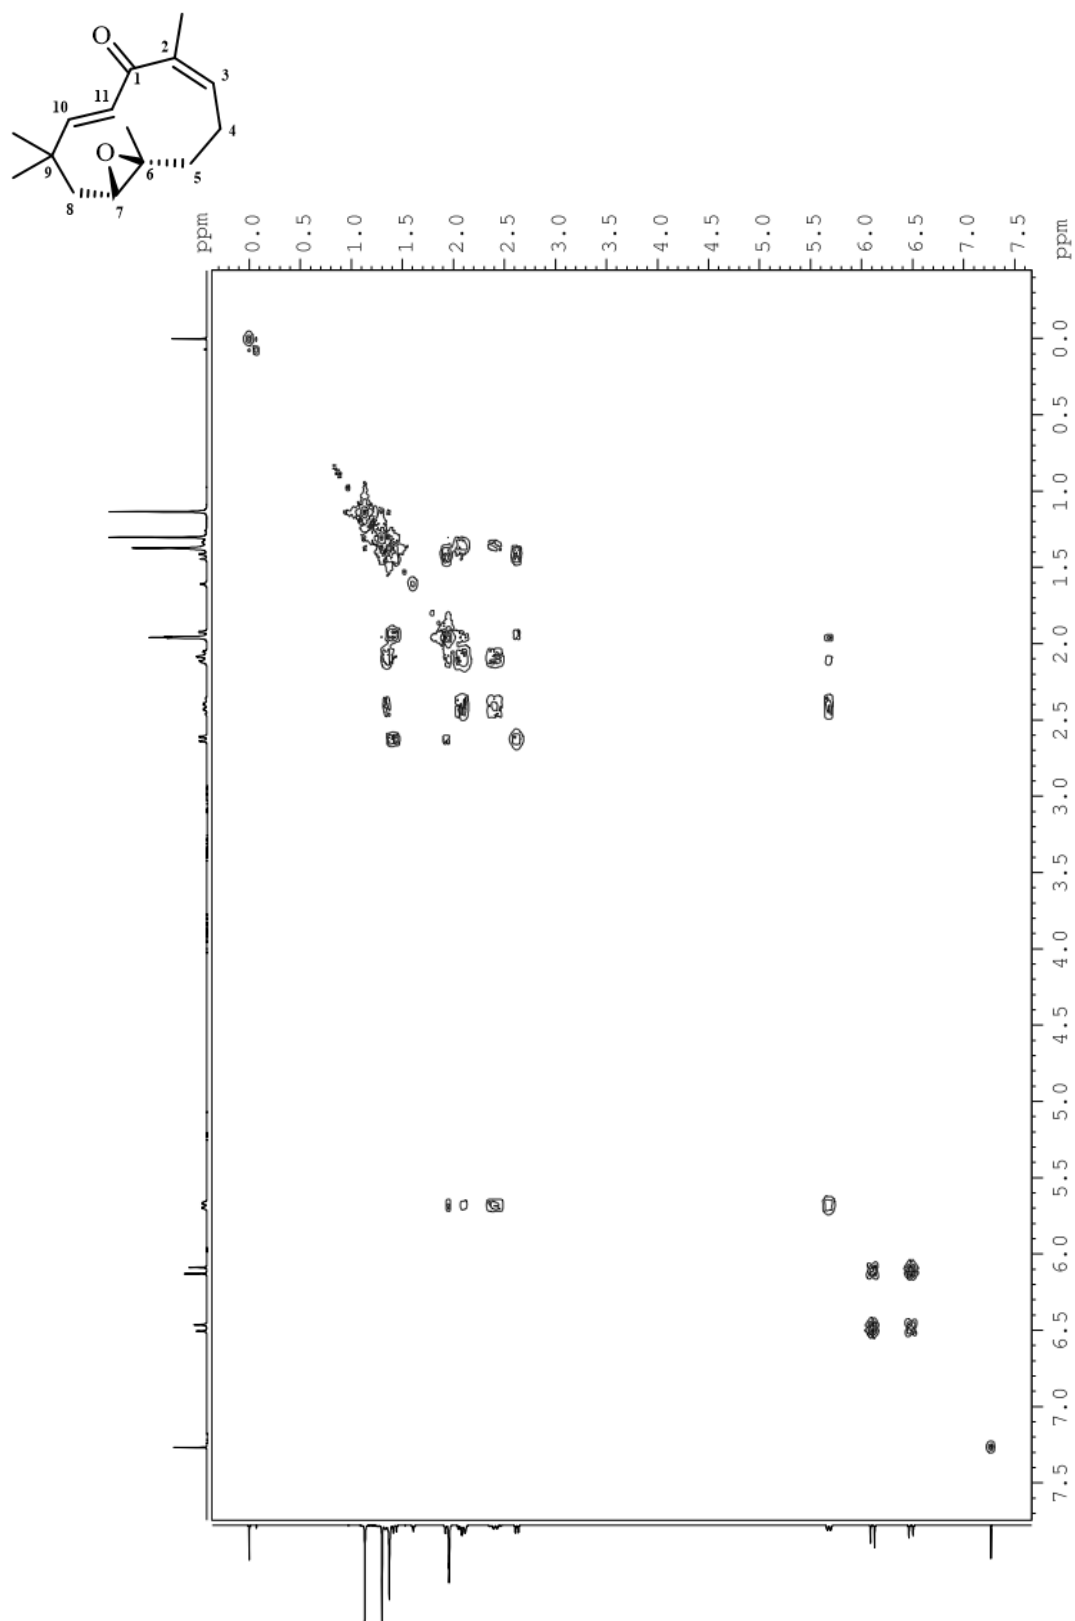

**Figure S66.**  $^1\text{H}$ - $^1\text{H}$  COSY of **12** ( $\text{CDCl}_3$ , 400 MHz).

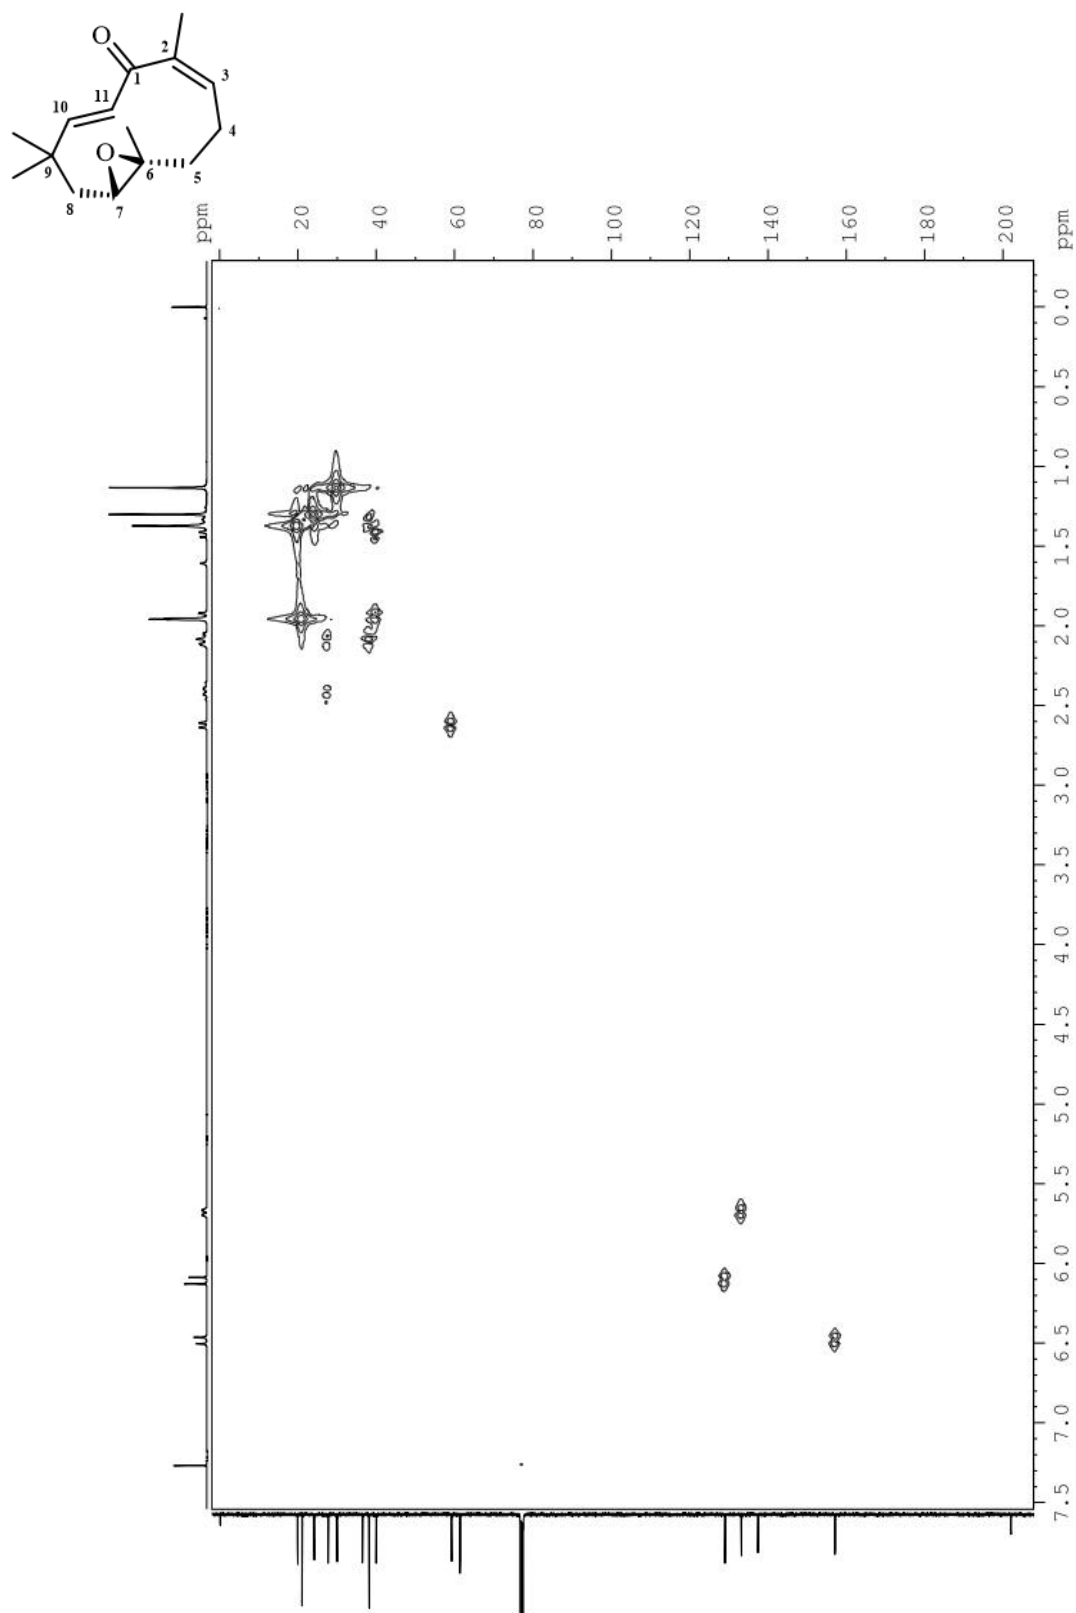

**Figure S67.**  $^1\text{H}$ - $^{13}\text{C}$  HMQC of **12** ( $\text{CDCl}_3$ , 400 MHz).



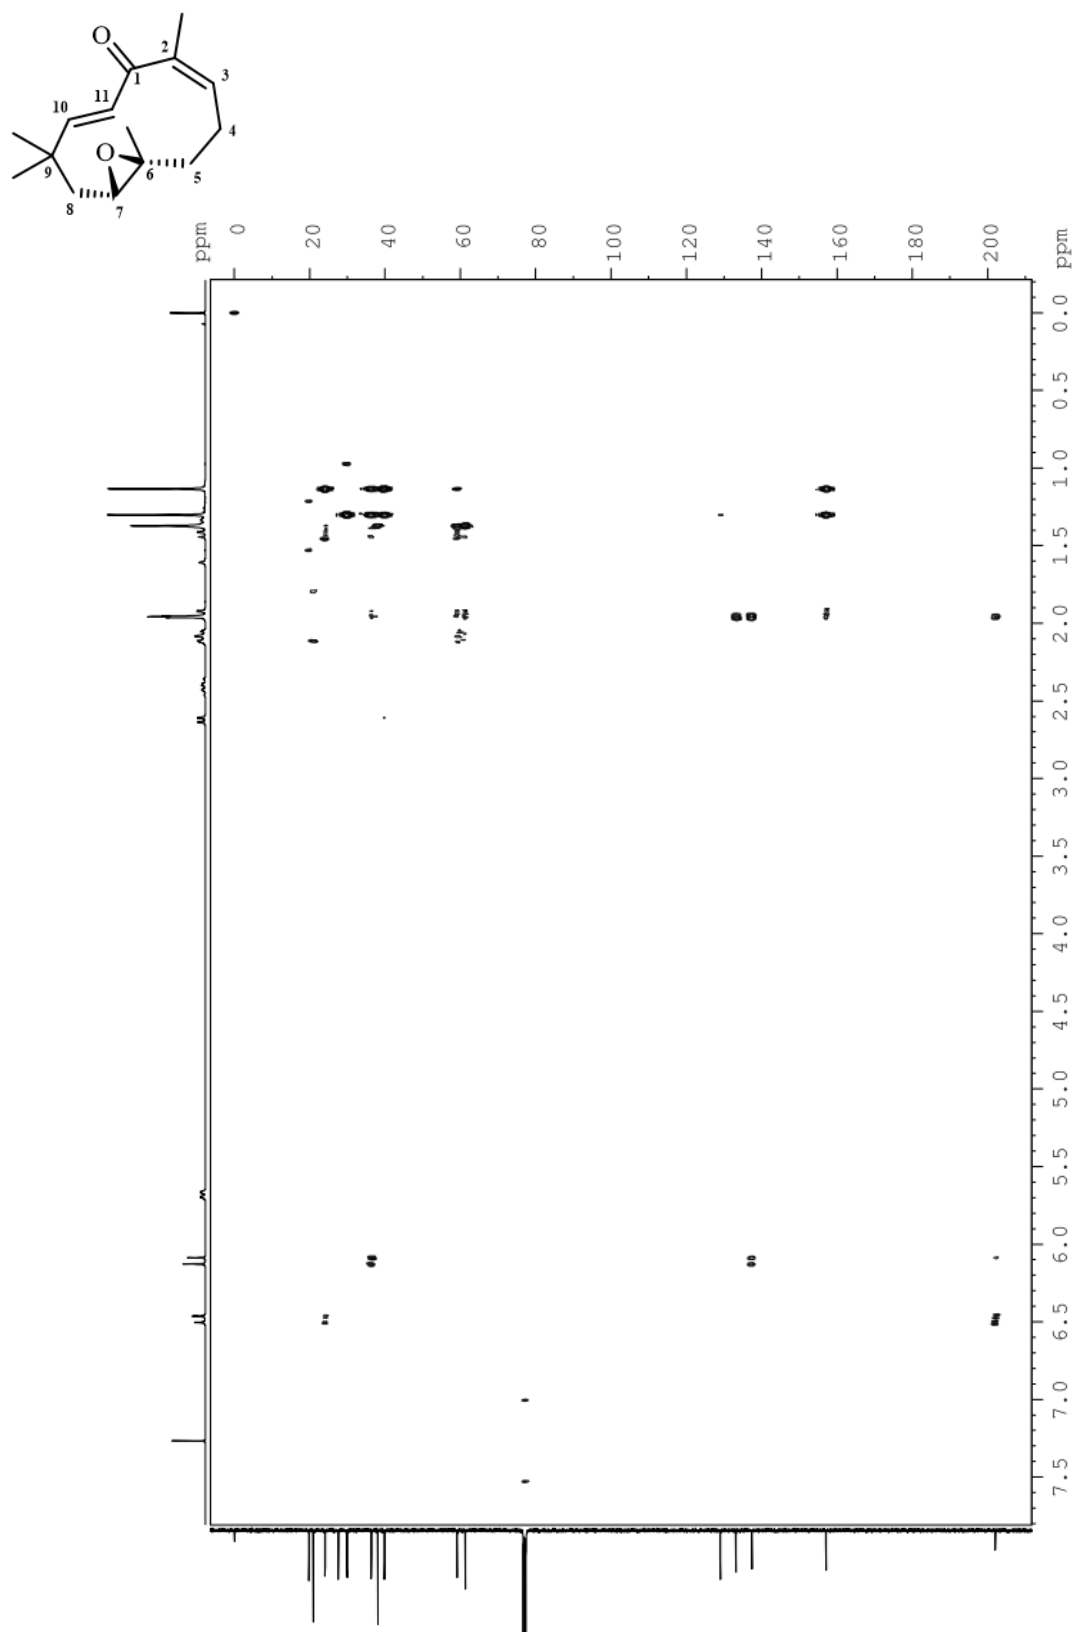

**Figure S68.**  $^1\text{H}$ - $^{13}\text{C}$  HMBC of **12** ( $\text{CDCl}_3$ , 400 MHz).

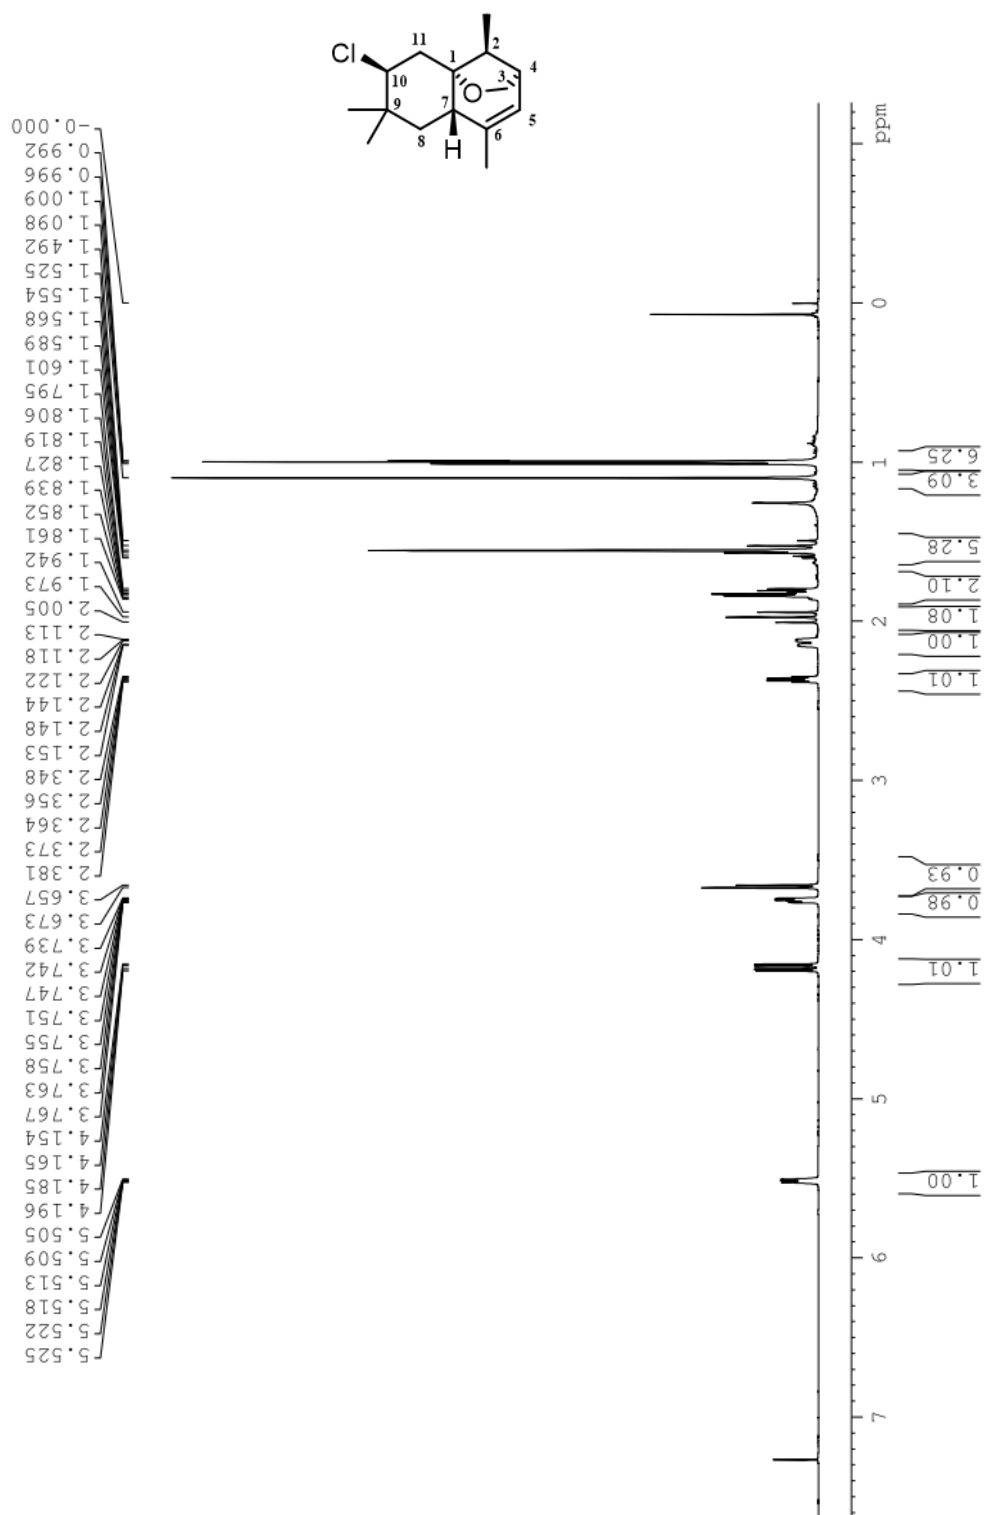

**Figure S69.** <sup>1</sup>H NMR spectrum of **13** (CDCl<sub>3</sub>, 400 MHz).

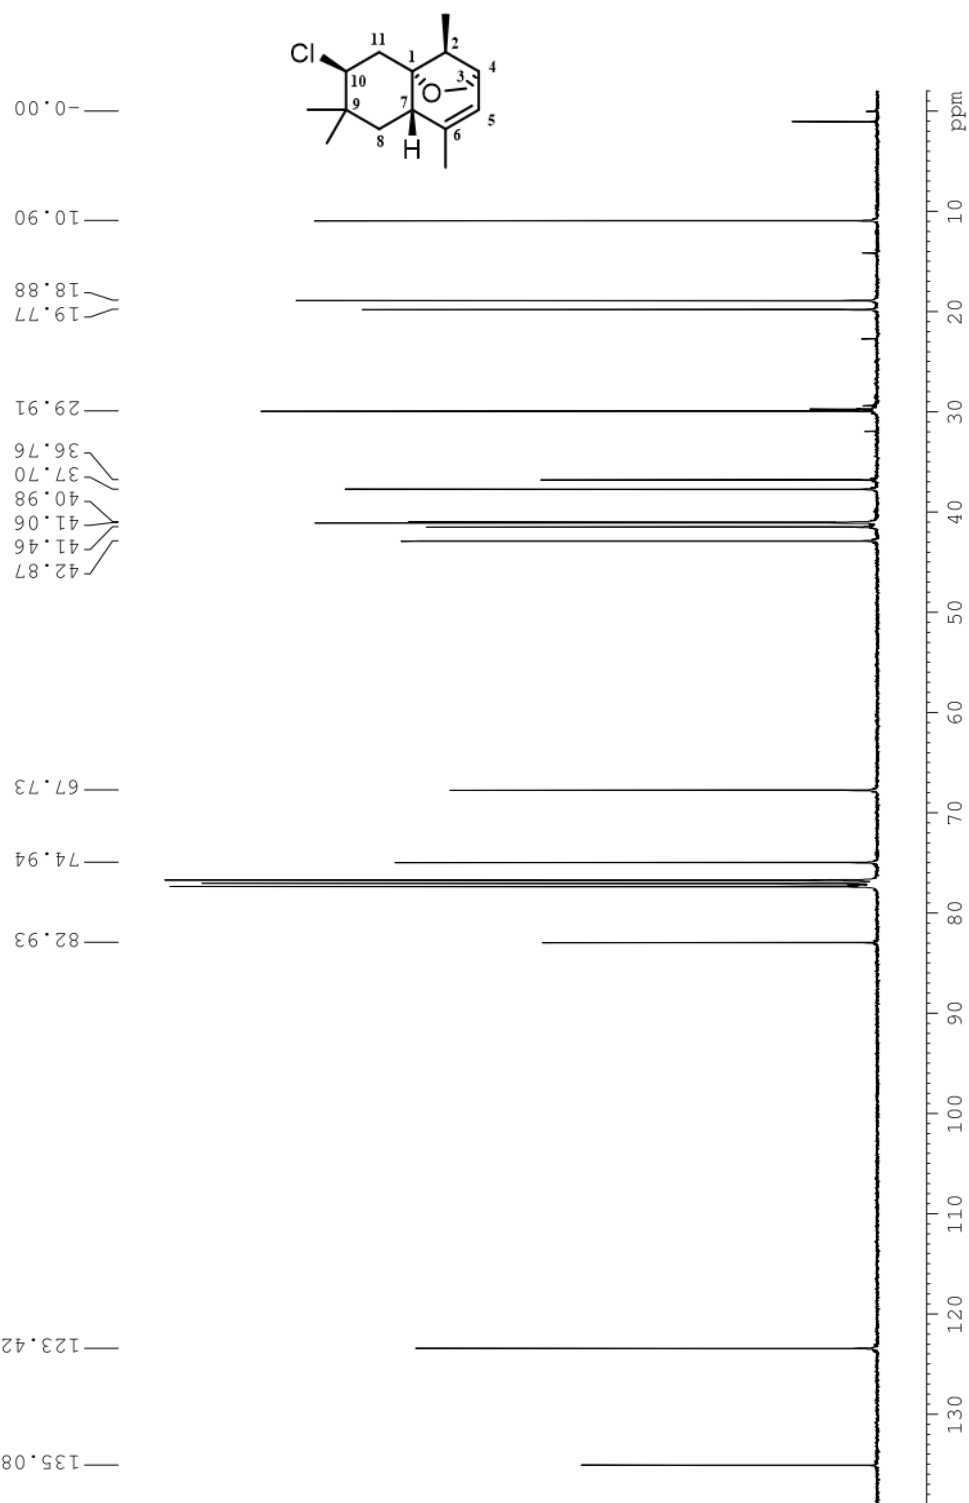

**Figure S70.**  $^{13}\text{C}\{^1\text{H}\}$  NMR spectrum of **13** ( $\text{CDCl}_3$ , 100 MHz).

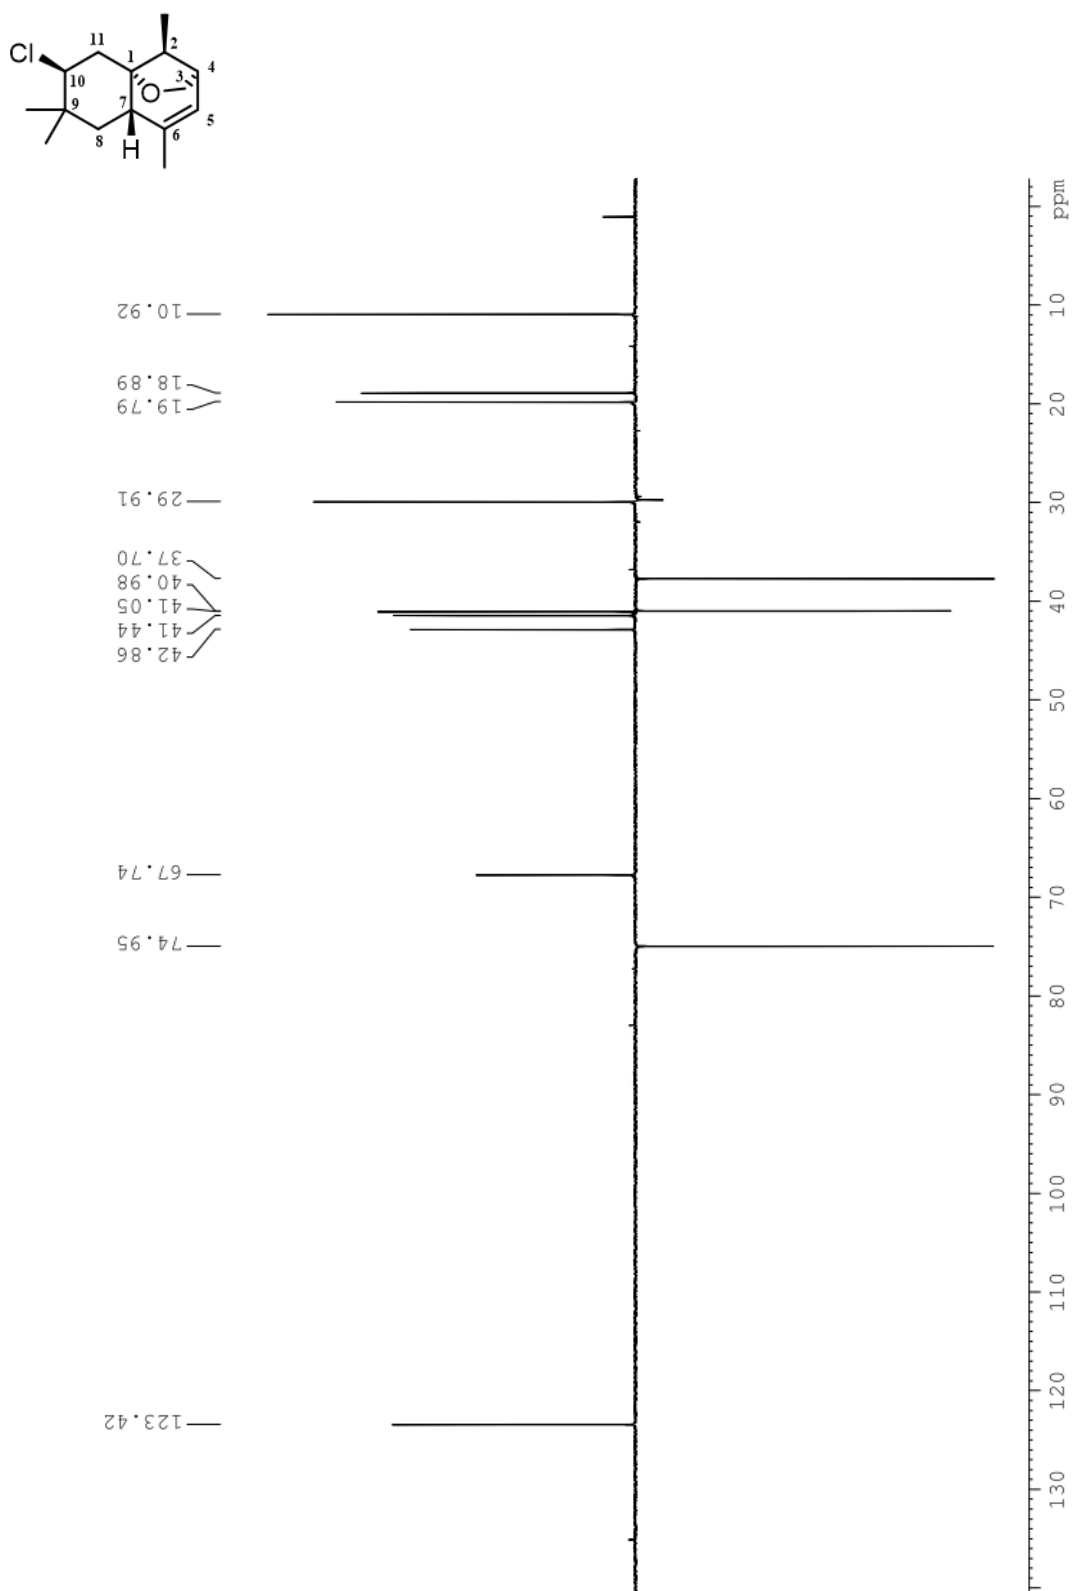

**Figure S71.** DEPT-135 spectrum of **13** (CDCl<sub>3</sub>, 100 MHz).

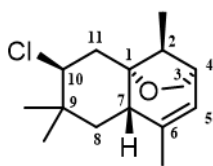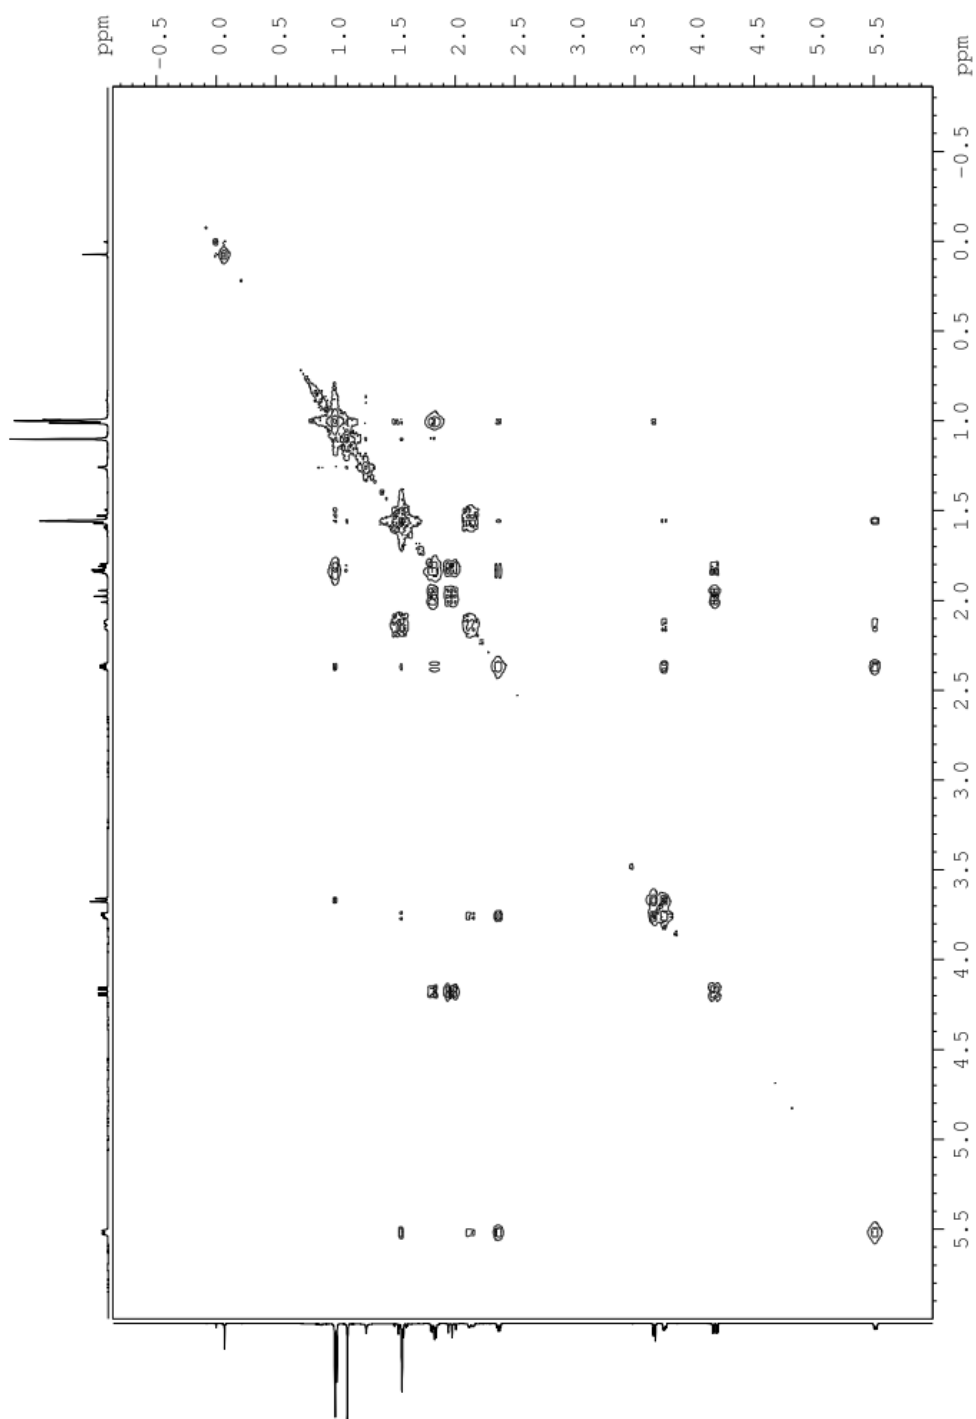

**Figure S72.** <sup>1</sup>H-<sup>1</sup>H COSY of **13** (CDCl<sub>3</sub>, 400 MHz).

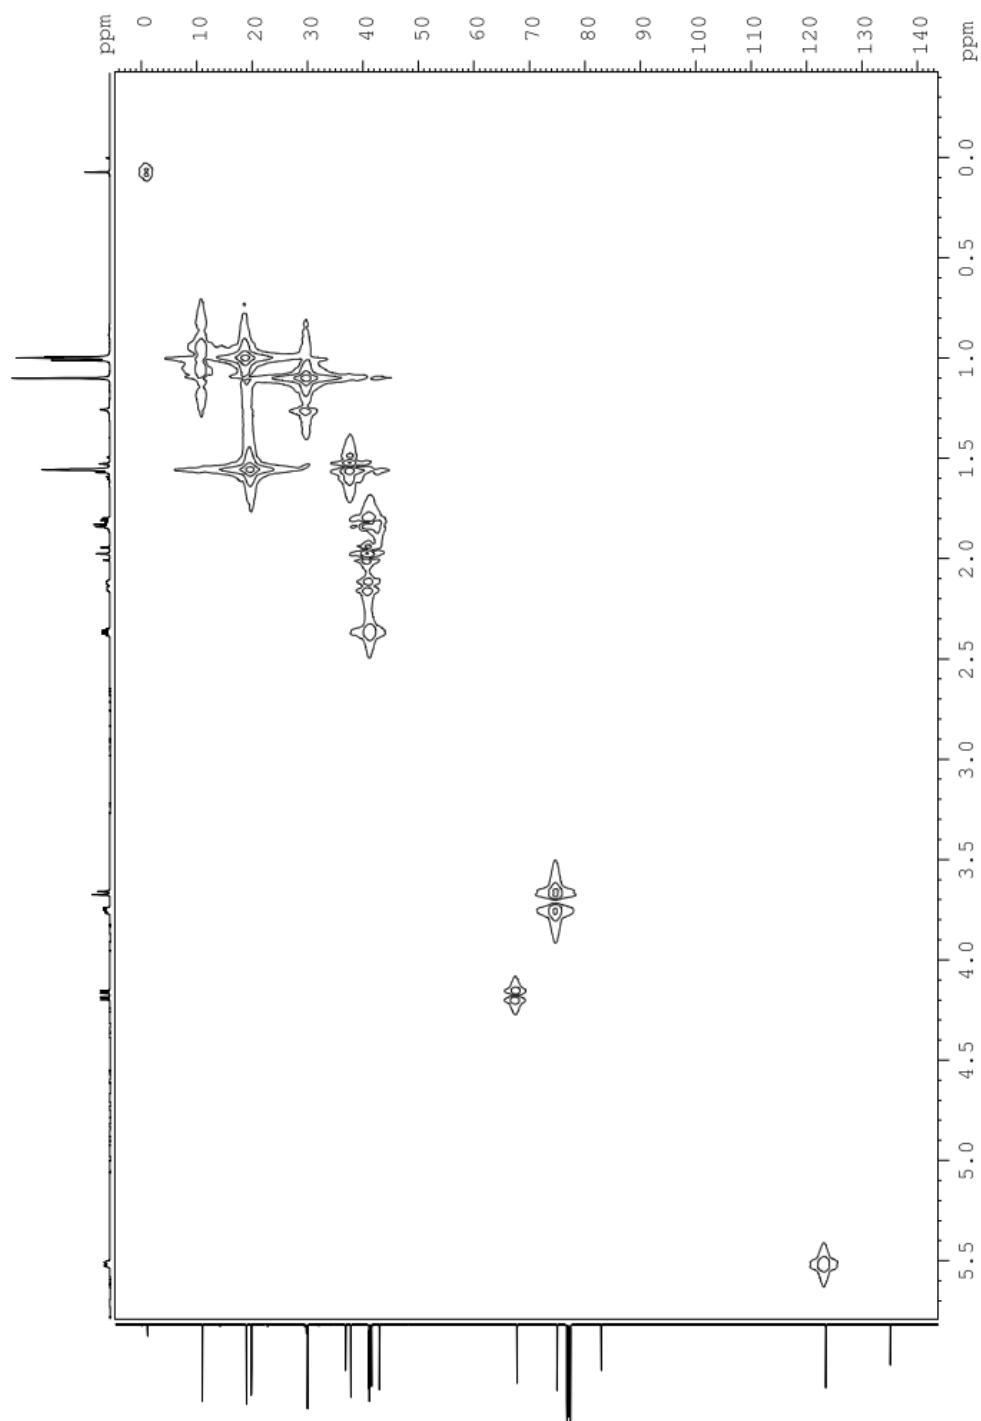

**Figure S73.**  $^1\text{H}$ - $^{13}\text{C}$  HMQC of **13** ( $\text{CDCl}_3$ , 400 MHz).

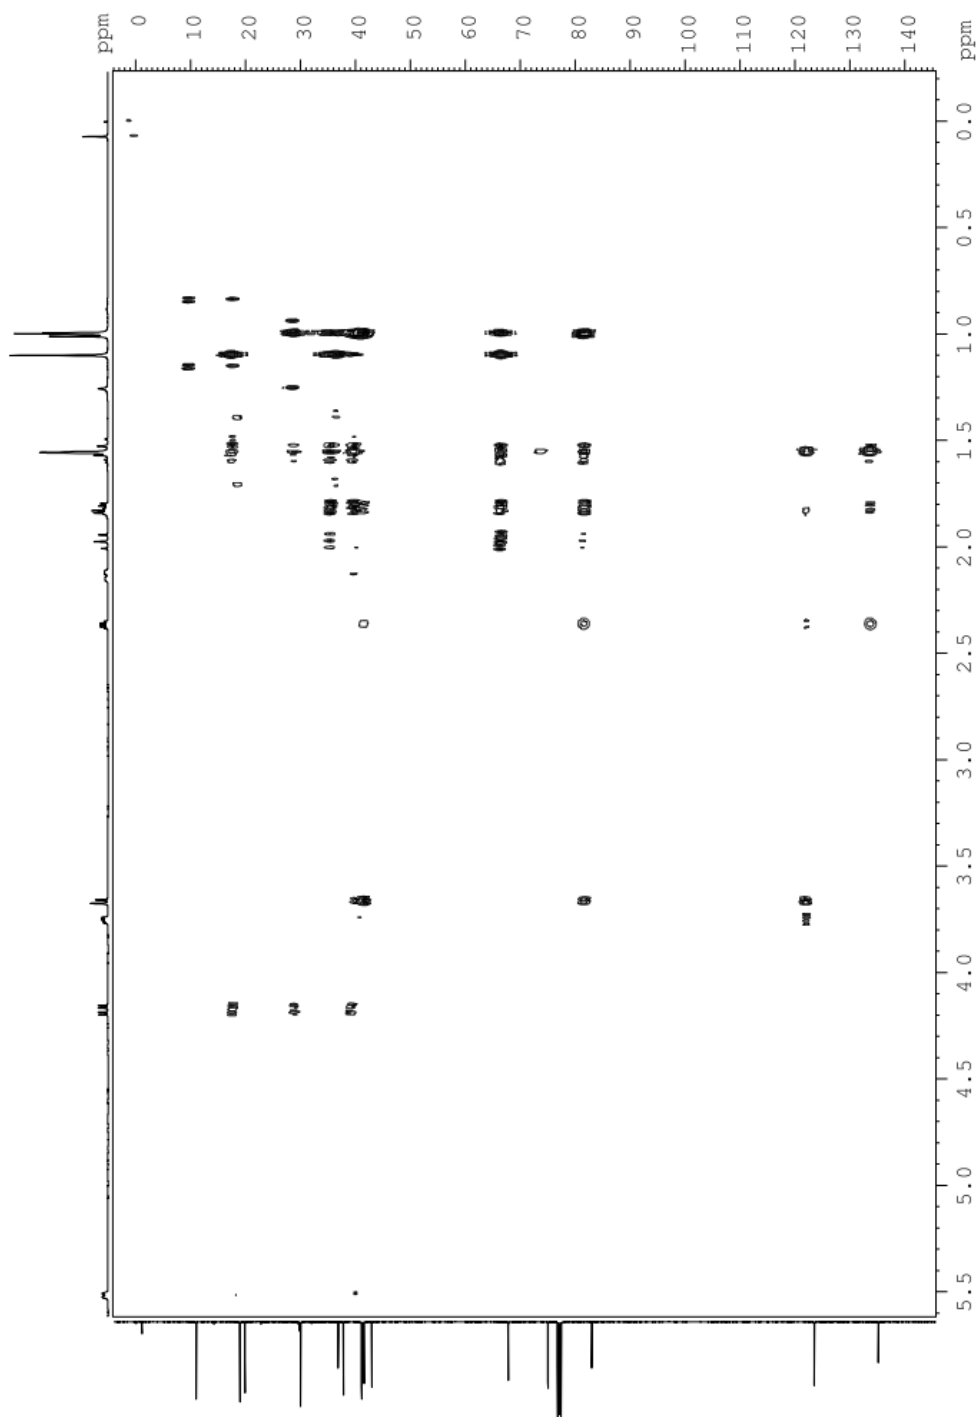

**Figure S74.**  $^1\text{H}$ - $^{13}\text{C}$  HMBC of **13** ( $\text{CDCl}_3$ , 400 MHz).

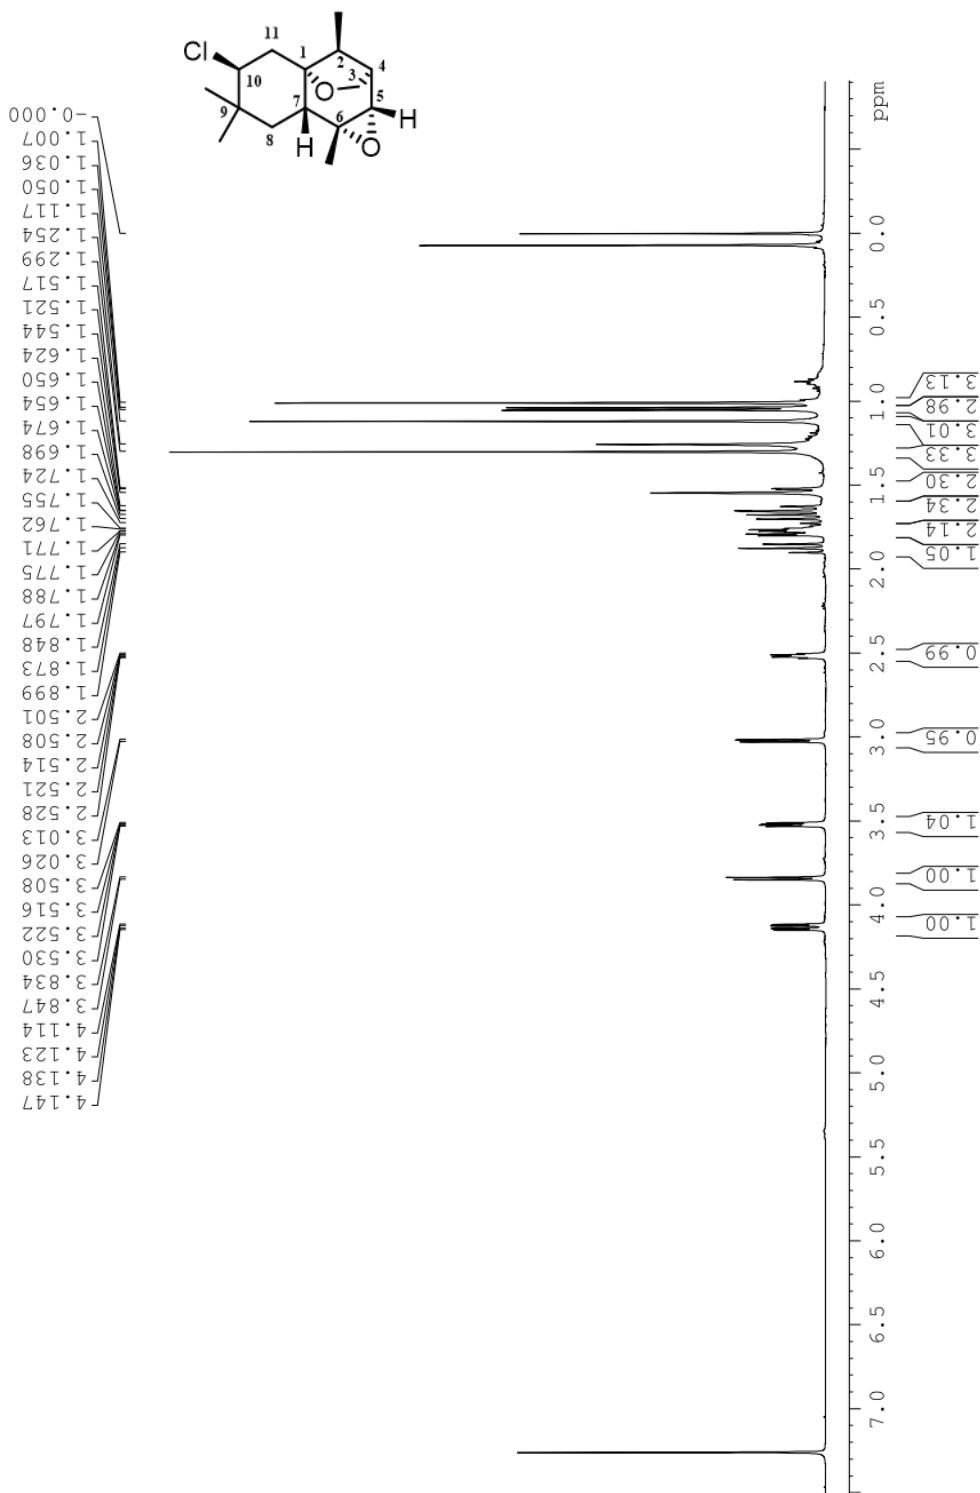

**Figure S75.** <sup>1</sup>H NMR spectrum of 14 (CDCl<sub>3</sub>, 500 MHz).



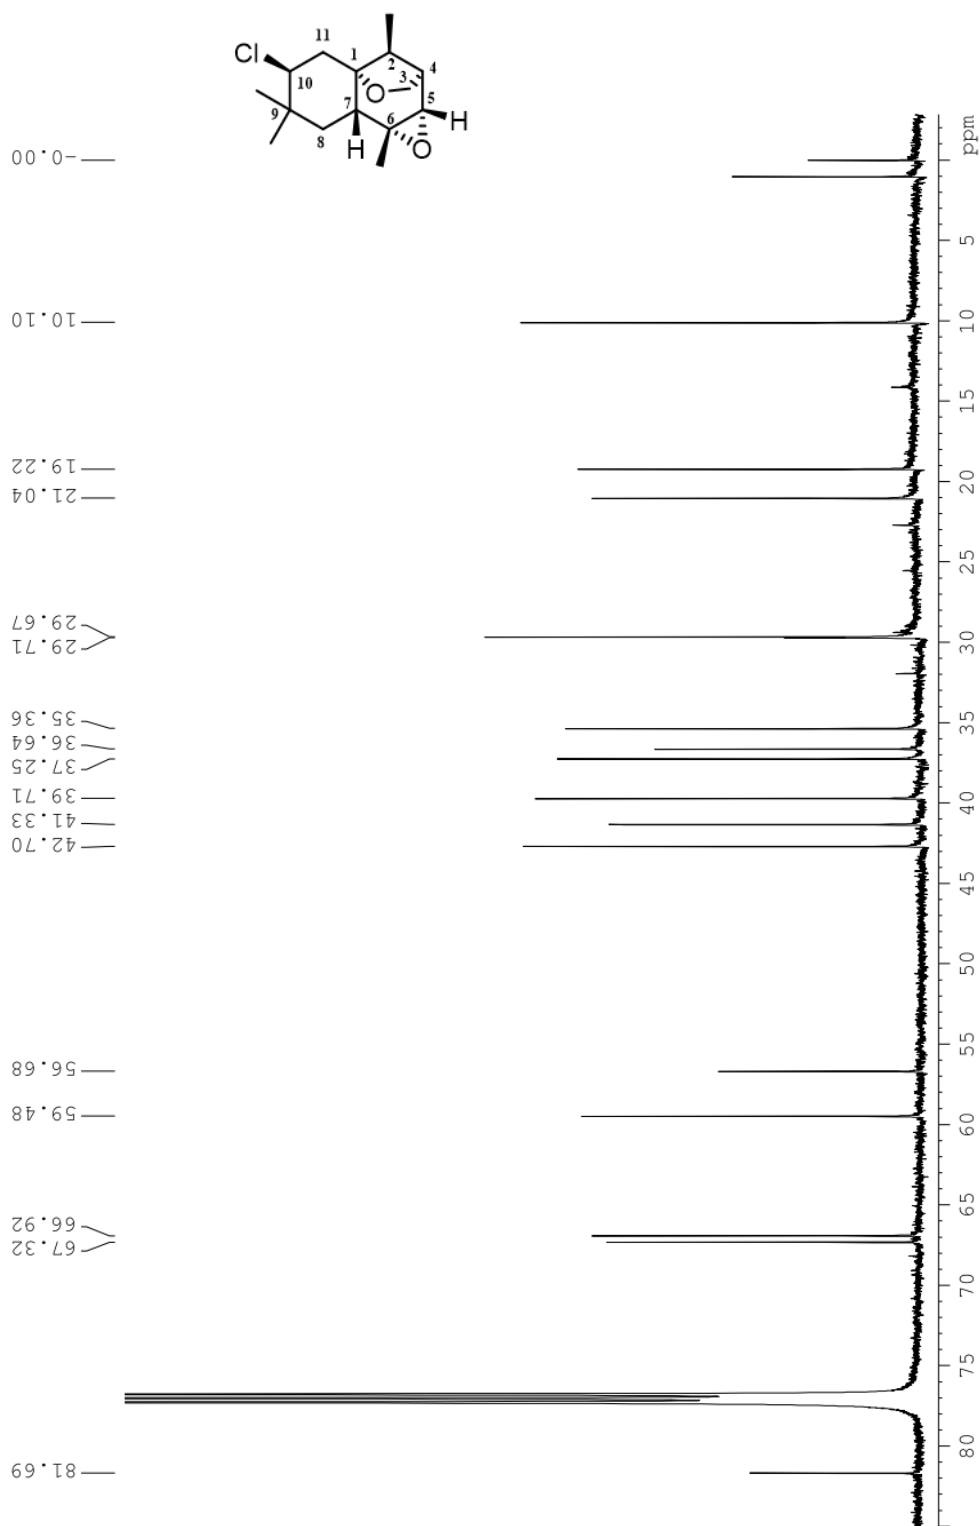

**Figure S76.**  $^{13}\text{C}\{^1\text{H}\}$  NMR spectrum of **14** ( $\text{CDCl}_3$ , 125 MHz).

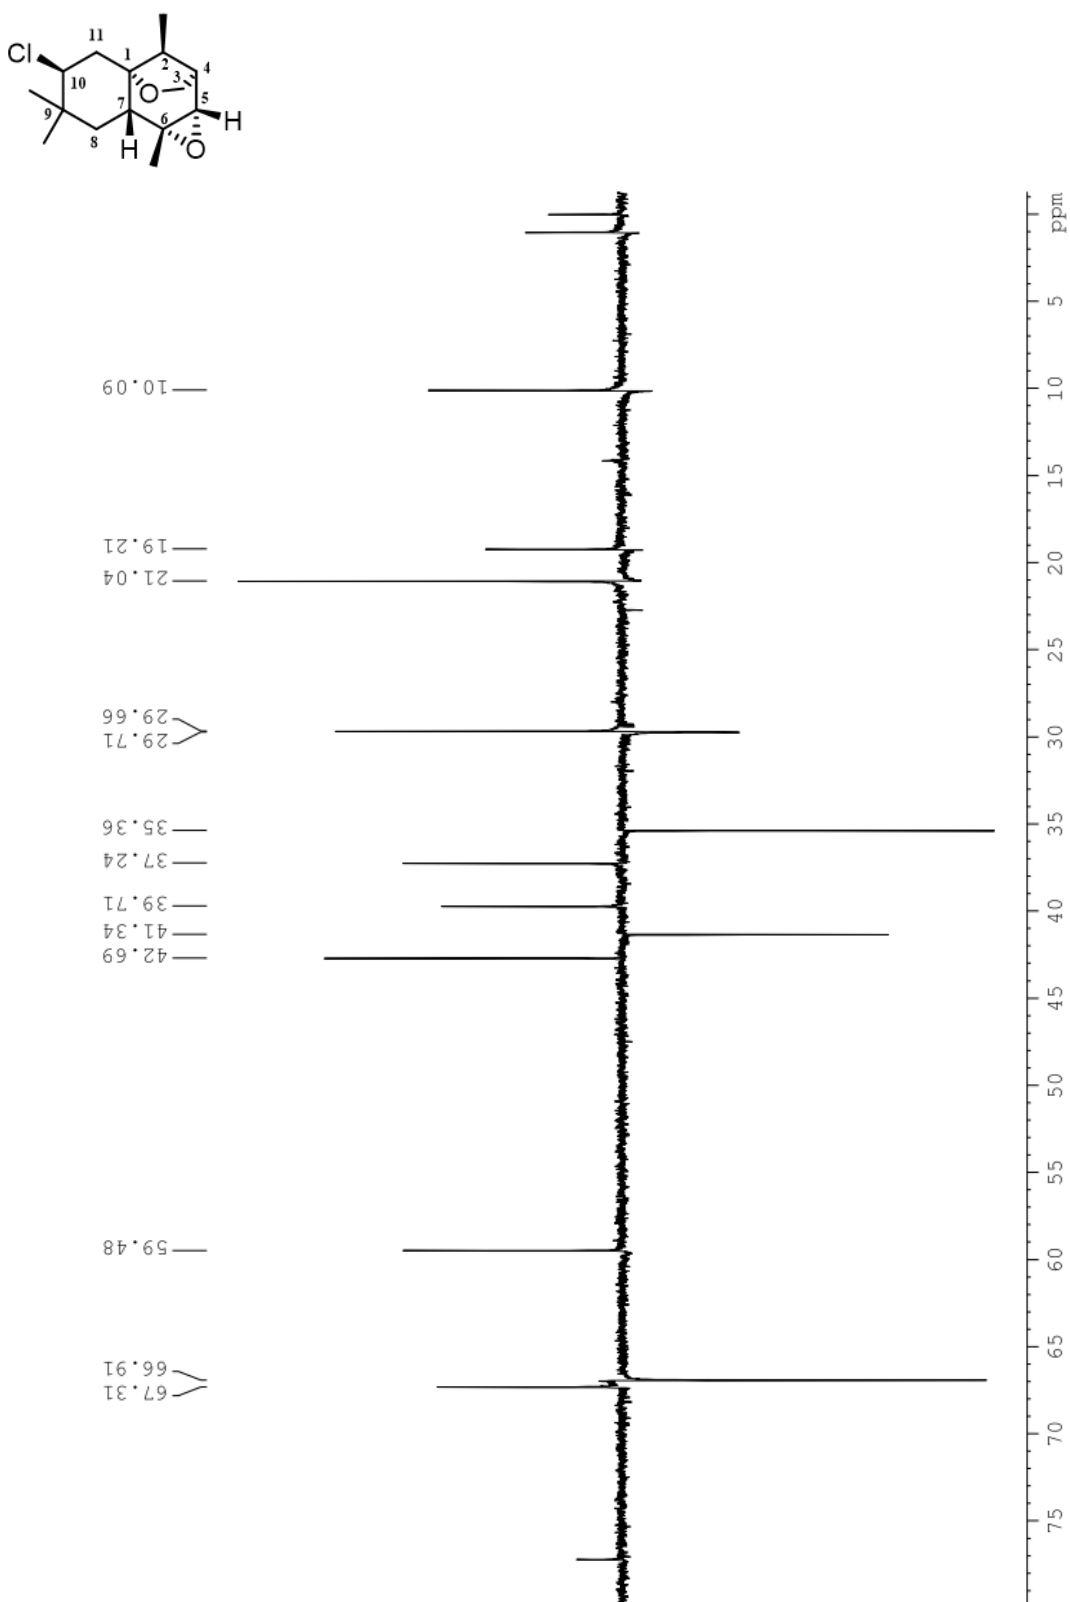

**Figure S77.** DEPT-135 spectrum of **14** (CDCl<sub>3</sub>, 125 MHz).

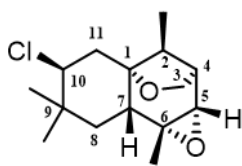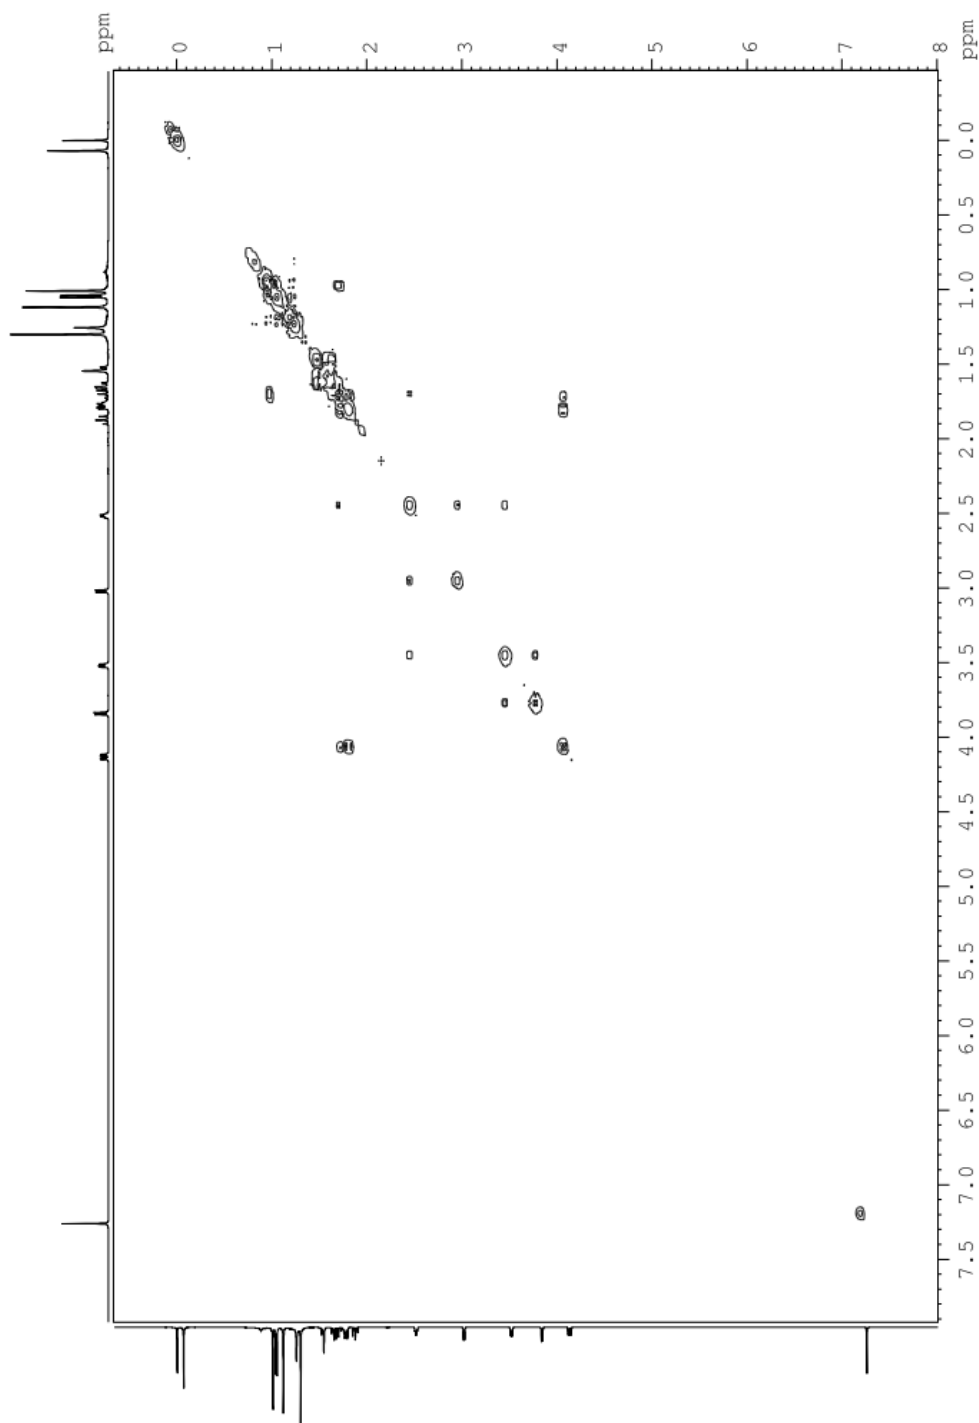

**Figure S78.**  $^1\text{H}$ - $^1\text{H}$  COSY of **14** ( $\text{CDCl}_3$ , 500 MHz).

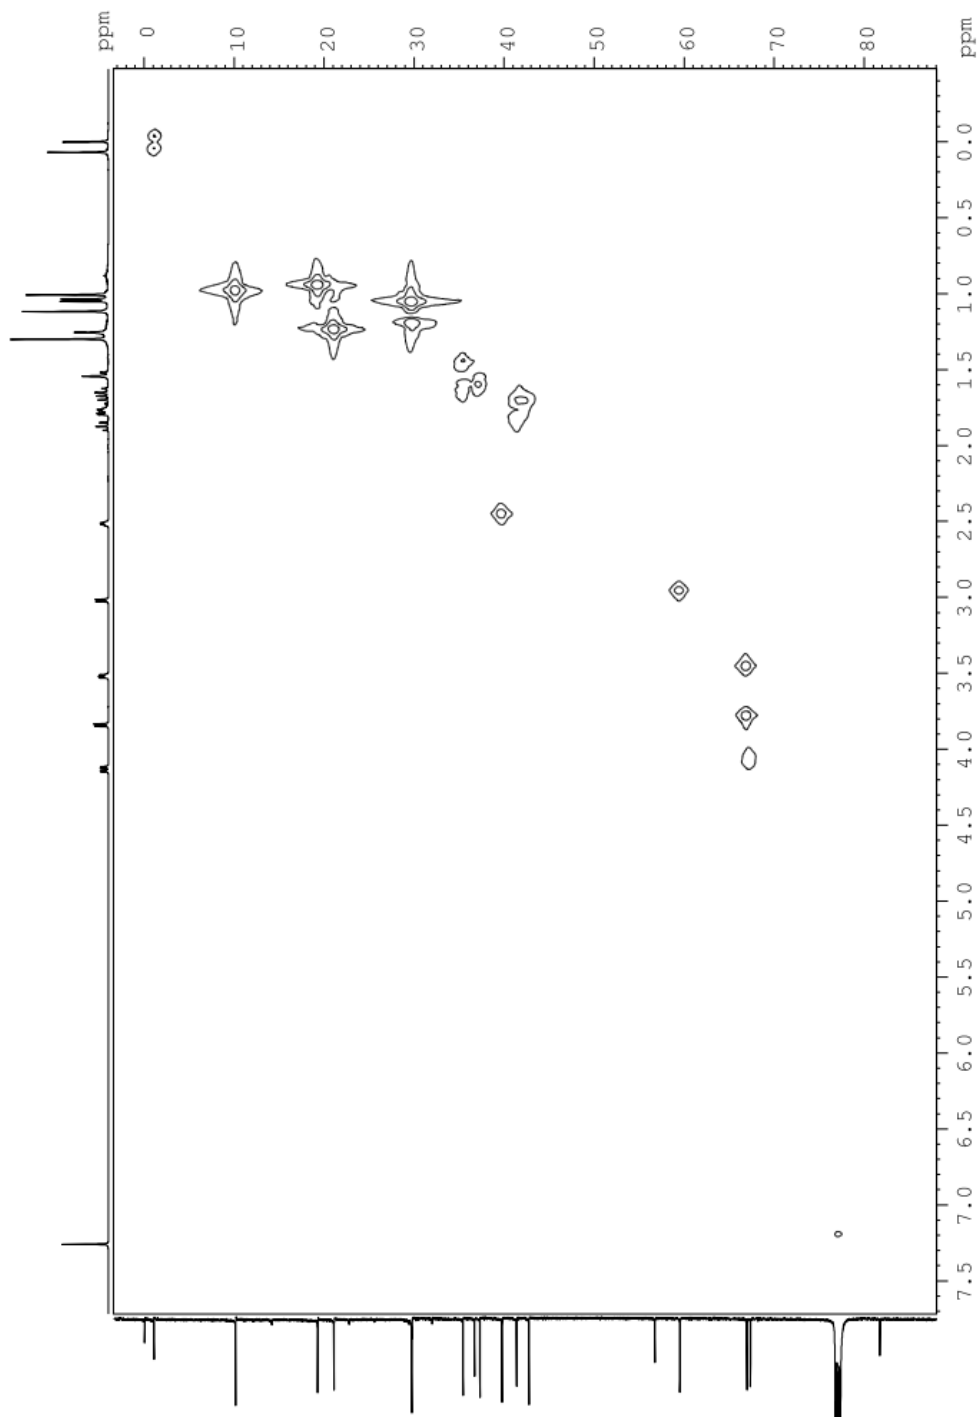

**Figure S79.**  $^1\text{H}$ - $^{13}\text{C}$  HMQC of 14 ( $\text{CDCl}_3$ , 500 MHz).

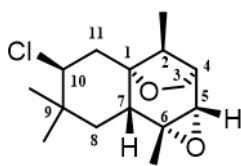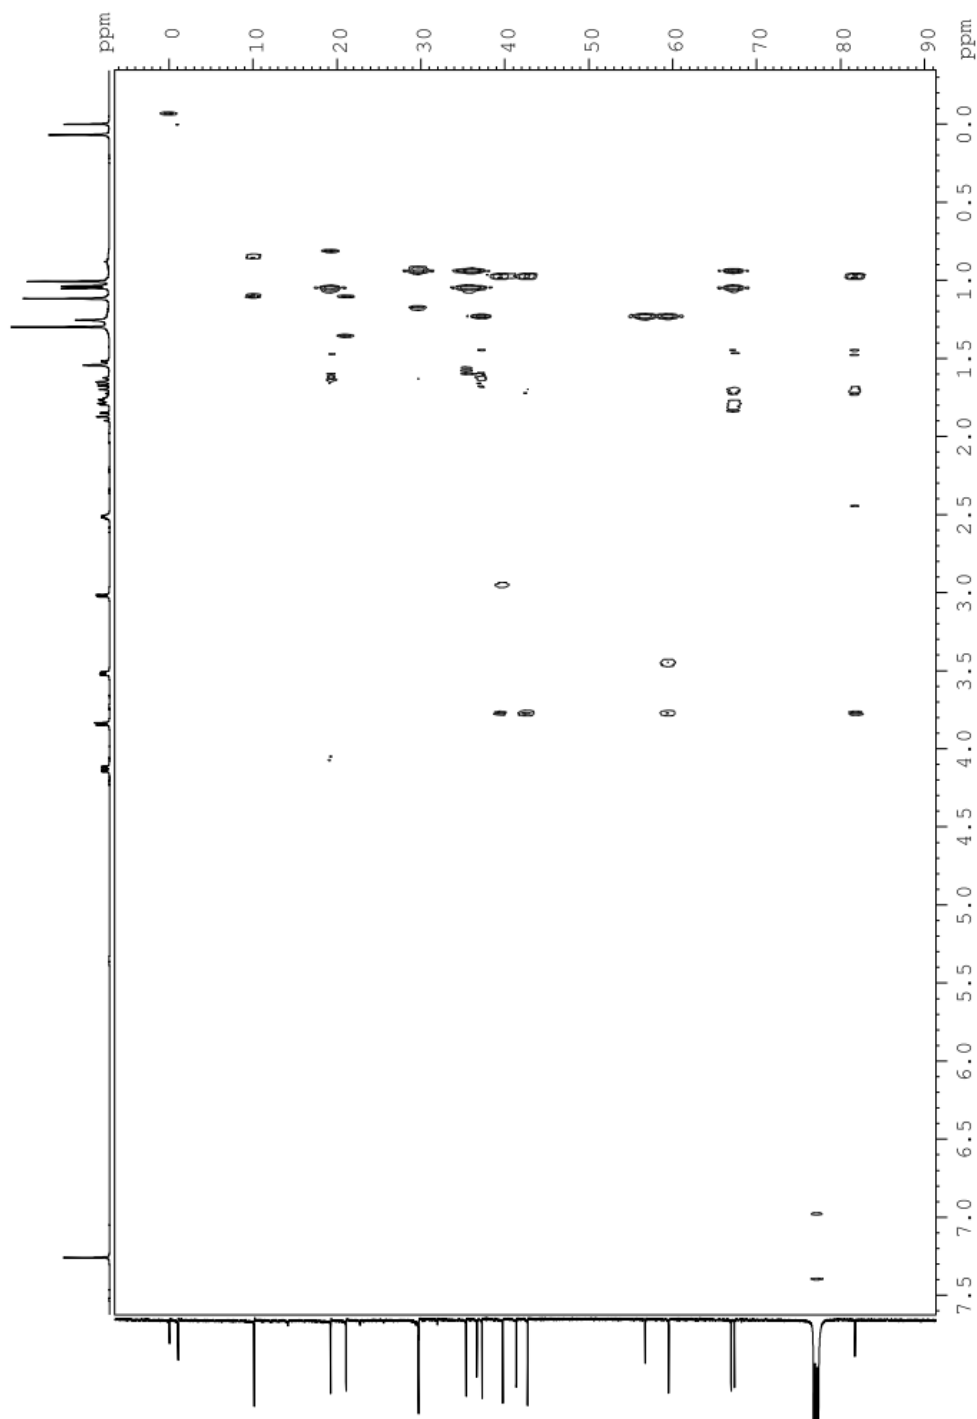

**Figure S80.**  $^1\text{H}$ - $^{13}\text{C}$  HMBC of **14** ( $\text{CDCl}_3$ , 500 MHz).

## X-ray crystal structures of compounds

### Data collection and structure solution

The intensity data were measured on a Rigaku R-AXIS RAPID diffractometer using graphite monochromated Mo K $\alpha$  radiation ( $\lambda = 0.71075 \text{ \AA}$ ). The structure was solved by direct methods (SIR97) and expanded using Fourier techniques (DIRDIF99). All calculations were performed using the Crystal Structure crystallographic software package. Compounds **5**, **6**, **8**, (2*RS*,3*RS*)-**11**, (2*RS*,3*SR*)-**11**, **12**, and **14** were obtained as racemates, and the following diagrams shows one configuration of the two.

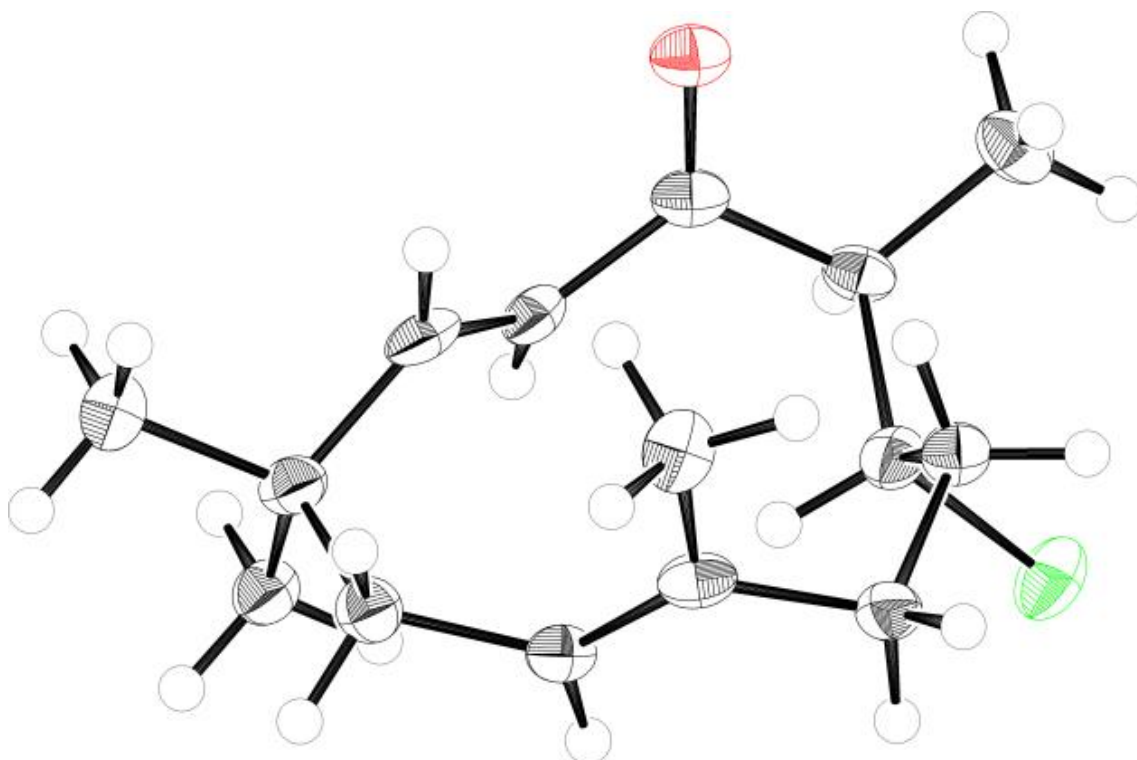

**Figure S81.** ORTEP diagram of **5**. The ellipsoid contour of probability level is 50%.

**Table S9.** Crystal data and structure refinement for compound **5**.

---

|                                                     |                                                             |                        |
|-----------------------------------------------------|-------------------------------------------------------------|------------------------|
| CCDC code                                           | 2067495                                                     |                        |
| Chemical formula                                    | C <sub>15</sub> H <sub>23</sub> ClO                         |                        |
| Formula weight                                      | 254.80                                                      |                        |
| Crystal system                                      | Triclinic                                                   |                        |
| Space group                                         | <i>P</i> -1                                                 |                        |
| Unit cell dimensions                                | <i>a</i> = 7.085(3) Å                                       | <i>α</i> = 79.174(15)° |
|                                                     | <i>b</i> = 10.810(5) Å                                      | <i>β</i> = 85.596(11)° |
|                                                     | <i>c</i> = 19.320(7) Å                                      | <i>γ</i> = 82.452(14)° |
| Volume                                              | 1438.5(10) Å <sup>3</sup>                                   |                        |
| <i>Z</i>                                            | 4                                                           |                        |
| Density (calculated)                                | 1.176 g/cm <sup>3</sup>                                     |                        |
| Temperature                                         | 93(2) K                                                     |                        |
| Wavelength                                          | 0.71075 Å                                                   |                        |
| Absorption coefficient                              | 2.491 cm <sup>-1</sup>                                      |                        |
| <i>F</i> (000)                                      | 552                                                         |                        |
| Reflections collected                               | 11704                                                       |                        |
| Independent reflections                             | 5170 [ <i>R</i> (int) = 0.1274]                             |                        |
| Theta range for data collection                     | 3.04 to 27.50°                                              |                        |
| Index ranges                                        | -8 ≤ <i>h</i> ≤ 8, -12 ≤ <i>k</i> ≤ 12, -23 ≤ <i>l</i> ≤ 20 |                        |
| Completeness to theta = 25.24°                      | 99.2%                                                       |                        |
| Absorption correction                               | Multi-scan                                                  |                        |
| Max. and min. transmission                          | 0.990 and 0.416                                             |                        |
| Final <i>R</i> indices [ <i>I</i> > 2σ( <i>I</i> )] | <i>R</i> 1 = 0.0839                                         |                        |
| <i>R</i> indices (all data)                         | <i>R</i> 1 = 0.1820, <i>wR</i> 2 = 0.2127                   |                        |
| Refinement method                                   | Full-matrix least-squares on <i>F</i> <sup>2</sup>          |                        |
| Data / restraints / parameters                      | 5170 / 0 / 308                                              |                        |
| Goodness-of-fit on <i>F</i> <sup>2</sup>            | 1.035                                                       |                        |
| Largest diff. peak and hole                         | 0.38 and -0.57 e/Å <sup>-3</sup>                            |                        |

---

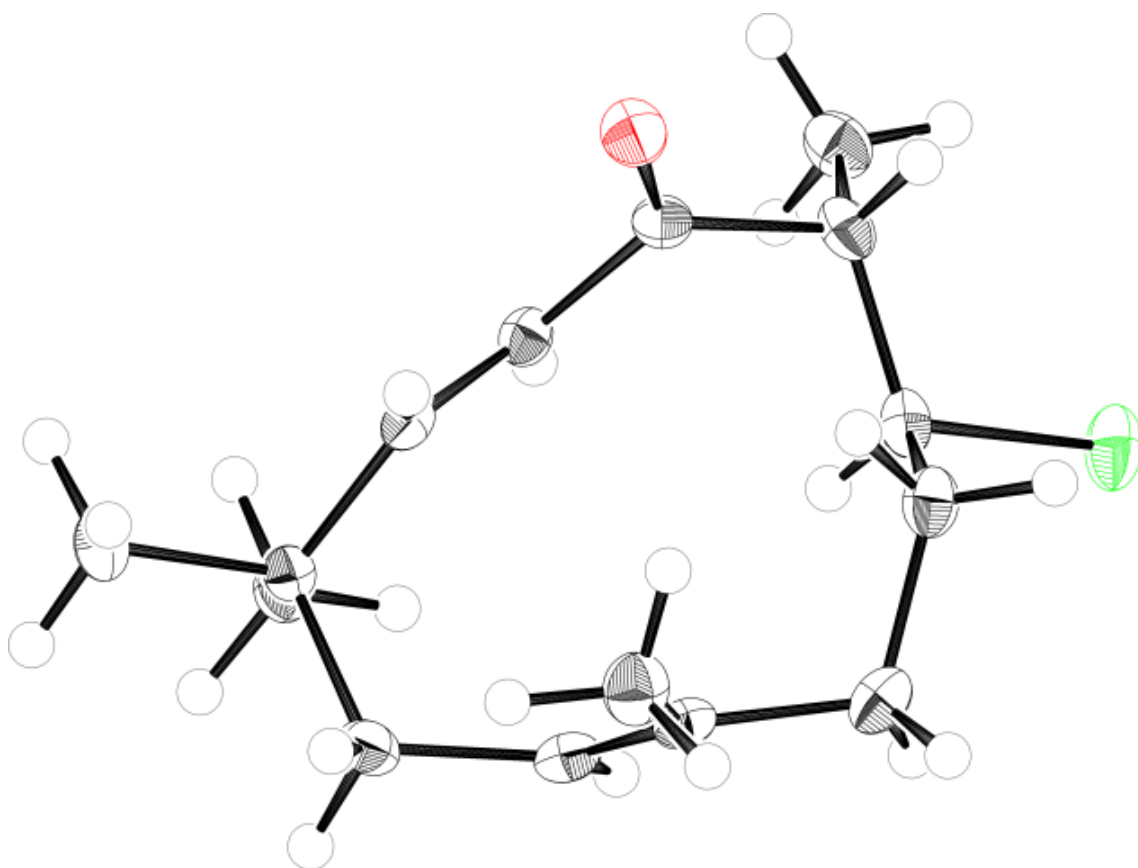

**Figure S82.** ORTEP diagram of **6**. The ellipsoid contour of probability level is 50%.



**Table S10.** Crystal data and structure refinement for compound **6**.

---

|                                                     |                                                             |                            |
|-----------------------------------------------------|-------------------------------------------------------------|----------------------------|
| CCDC code                                           | 2067496                                                     |                            |
| Chemical formula                                    | C <sub>15</sub> H <sub>23</sub> ClO                         |                            |
| Formula weight                                      | 254.80                                                      |                            |
| Crystal system                                      | Monoclinic                                                  |                            |
| Space group                                         | <i>P</i> 2 <sub>1</sub> / <i>n</i>                          |                            |
| Unit cell dimensions                                | <i>a</i> = 5.702(4) Å                                       | $\alpha = 90^\circ$        |
|                                                     | <i>b</i> = 17.711(8) Å                                      | $\beta = 94.834(19)^\circ$ |
|                                                     | <i>c</i> = 14.235(6) Å                                      | $\gamma = 90^\circ$        |
| Volume                                              | 1432.5(12) Å <sup>3</sup>                                   |                            |
| <i>Z</i>                                            | 4                                                           |                            |
| Density (calculated)                                | 1.181 g/cm <sup>3</sup>                                     |                            |
| Temperature                                         | 93(2) K                                                     |                            |
| Wavelength                                          | 0.71075 Å                                                   |                            |
| Absorption coefficient                              | 2.500 cm <sup>-1</sup>                                      |                            |
| <i>F</i> (000)                                      | 552                                                         |                            |
| Reflections collected                               | 11353                                                       |                            |
| Independent reflections                             | 2586 [ <i>R</i> (int) = 0.0427]                             |                            |
| Theta range for data collection                     | 3.10 to 27.52°                                              |                            |
| Index ranges                                        | -6 ≤ <i>h</i> ≤ 6, -18 ≤ <i>k</i> ≤ 21, -17 ≤ <i>l</i> ≤ 17 |                            |
| Completeness to theta = 25.24°                      | 99.7%                                                       |                            |
| Absorption correction                               | Multi-scan                                                  |                            |
| Max. and min. transmission                          | 0.988 and 0.631                                             |                            |
| Final <i>R</i> indices [ <i>I</i> > 2σ( <i>I</i> )] | <i>R</i> 1 = 0.0408                                         |                            |
| <i>R</i> indices (all data)                         | <i>R</i> 1 = 0.0483, <i>wR</i> 2 = 0.1136                   |                            |
| Refinement method                                   | Full-matrix least-squares on <i>F</i> <sup>2</sup>          |                            |
| Data / restraints / parameters                      | 2586 / 0 / 246                                              |                            |
| Goodness-of-fit on <i>F</i> <sup>2</sup>            | 1.140                                                       |                            |
| Largest diff. peak and hole                         | 0.34 and -0.21 e/Å <sup>-3</sup>                            |                            |

---

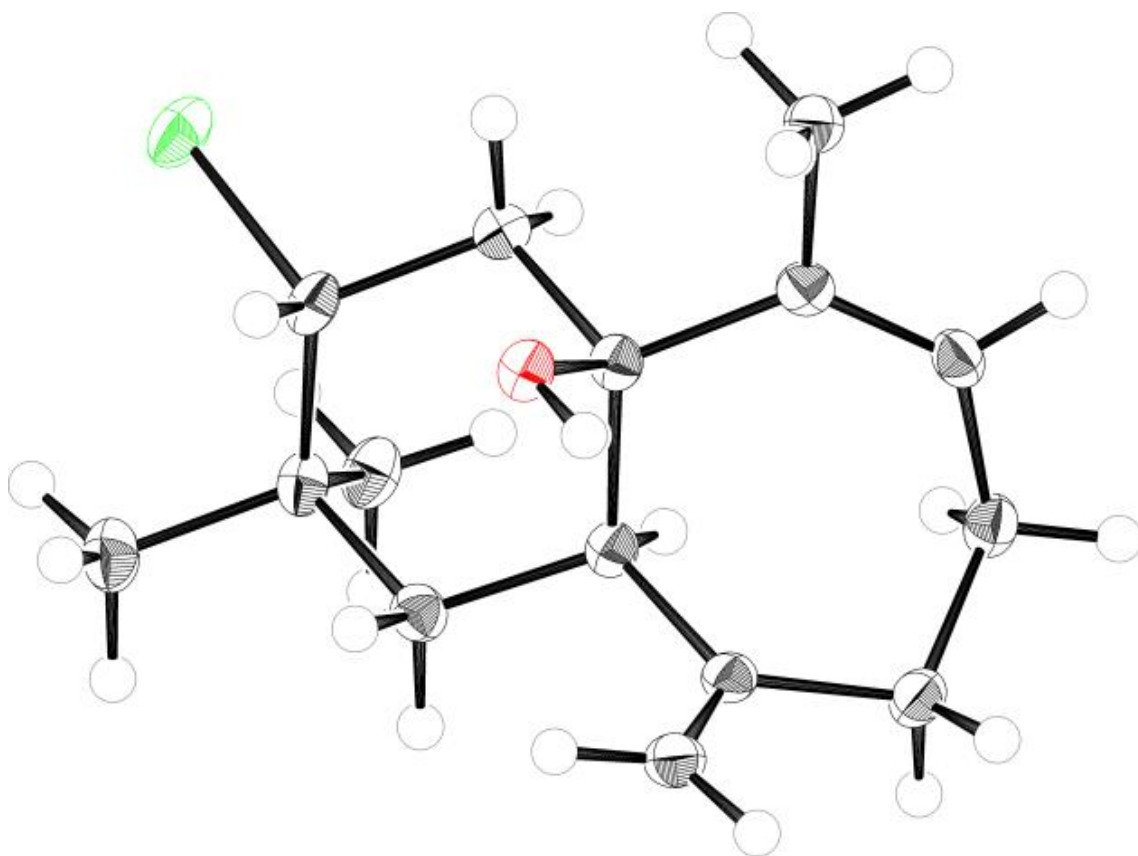

**Figure S83.** ORTEP diagram of **8**. The ellipsoid contour of probability level is 50%.

**Table S11.** Crystal data and structure refinement for compound **8**.

---

|                                                     |                                                               |                        |
|-----------------------------------------------------|---------------------------------------------------------------|------------------------|
| CCDC code                                           | 2067497                                                       |                        |
| Chemical formula                                    | C <sub>15</sub> H <sub>23</sub> ClO                           |                        |
| Formula weight                                      | 254.80                                                        |                        |
| Crystal system                                      | Monoclinic                                                    |                        |
| Space group                                         | <i>P</i> 2 <sub>1</sub> / <i>c</i>                            |                        |
| Unit cell dimensions                                | <i>a</i> = 8.985(4) Å                                         | <i>α</i> = 90°         |
|                                                     | <i>b</i> = 14.486(9) Å                                        | <i>β</i> = 98.454(17)° |
|                                                     | <i>c</i> = 10.592(5) Å                                        | <i>γ</i> = 90°         |
| Volume                                              | 1363.5(12) Å <sup>3</sup>                                     |                        |
| <i>Z</i>                                            | 4                                                             |                        |
| Density (calculated)                                | 1.241 g/cm <sup>3</sup>                                       |                        |
| Temperature                                         | 93(2) K                                                       |                        |
| Wavelength                                          | 0.71075 Å                                                     |                        |
| Absorption coefficient                              | 2.629 cm <sup>-1</sup>                                        |                        |
| <i>F</i> (000)                                      | 552                                                           |                        |
| Reflections collected                               | 10714                                                         |                        |
| Independent reflections                             | 2469 [ <i>R</i> (int) = 0.0513]                               |                        |
| Theta range for data collection                     | 3.12 to 27.52°                                                |                        |
| Index ranges                                        | -10 ≤ <i>h</i> ≤ 10, -17 ≤ <i>k</i> ≤ 17, -12 ≤ <i>l</i> ≤ 12 |                        |
| Completeness to theta = 25.24°                      | 99.8                                                          |                        |
| Absorption correction                               | Multi-scan                                                    |                        |
| Max. and min. transmission                          | 0.964 and 0.636                                               |                        |
| Final <i>R</i> indices [ <i>I</i> > 2σ( <i>I</i> )] | <i>R</i> 1 = 0.0402                                           |                        |
| <i>R</i> indices (all data)                         | <i>R</i> 1 = 0.0490, <i>wR</i> 2 = 0.1071                     |                        |
| Refinement method                                   | Full-matrix least-squares on <i>F</i> <sup>2</sup>            |                        |
| Data / restraints / parameters                      | 2469 / 0 / 246                                                |                        |
| Goodness-of-fit on <i>F</i> <sup>2</sup>            | 1.079                                                         |                        |
| Largest diff. peak and hole                         | 0.45 and -0.25 e/Å <sup>-3</sup>                              |                        |

---

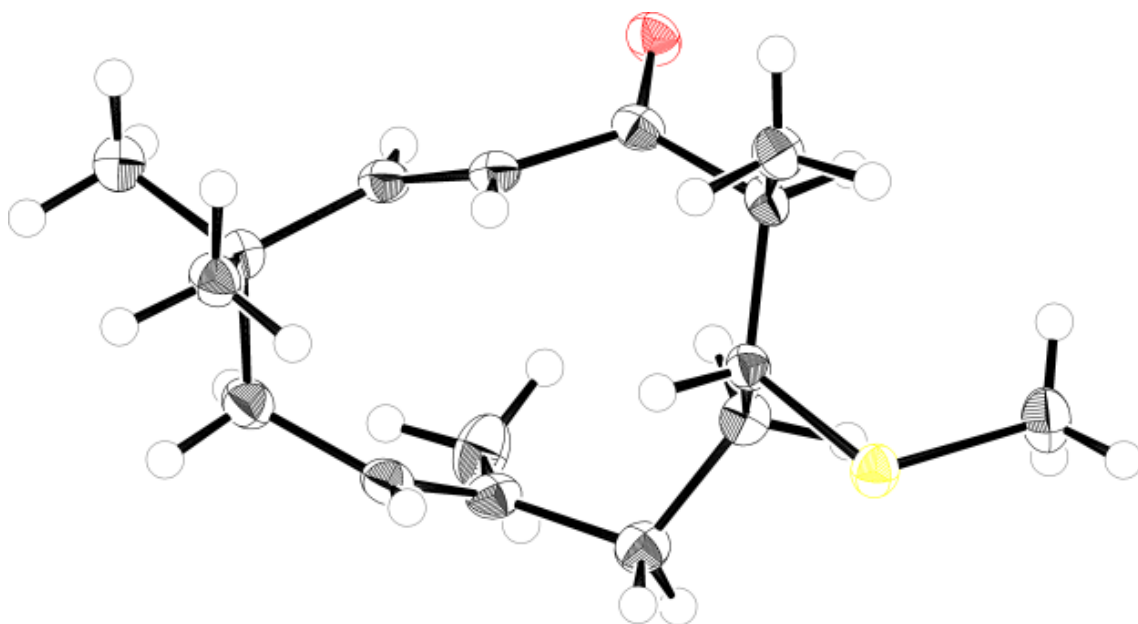

**Figure S84.** ORTEP diagram of (2*RS*,3*RS*)-11. The ellipsoid contour of probability level is 50%.

**Table S12.** Crystal data and structure refinement for (2*RS*,3*RS*)-11.

---

|                                                     |                                                               |                        |
|-----------------------------------------------------|---------------------------------------------------------------|------------------------|
| CCDC code                                           | 2067498                                                       |                        |
| Chemical formula                                    | C <sub>16</sub> H <sub>26</sub> O <sub>5</sub> S              |                        |
| Formula weight                                      | 266.44                                                        |                        |
| Crystal system                                      | Monoclinic                                                    |                        |
| Space group                                         | <i>P</i> 2 <sub>1</sub> / <i>n</i>                            |                        |
| Unit cell dimensions                                | <i>a</i> = 11.525(4) Å                                        | <i>α</i> = 90°         |
|                                                     | <i>b</i> = 9.518(4) Å                                         | <i>β</i> = 98.810(15)° |
|                                                     | <i>c</i> = 14.178(6) Å                                        | <i>γ</i> = 90°         |
| Volume                                              | 1537.0(11) Å <sup>3</sup>                                     |                        |
| <i>Z</i>                                            | 4                                                             |                        |
| Density (calculated)                                | 1.151 g/cm <sup>3</sup>                                       |                        |
| Temperature                                         | 93(2) K                                                       |                        |
| Wavelength                                          | 0.71075 Å                                                     |                        |
| Absorption coefficient                              | 1.989 cm <sup>-1</sup>                                        |                        |
| <i>F</i> (000)                                      | 584                                                           |                        |
| Reflections collected                               | 12048                                                         |                        |
| Independent reflections                             | 2782 [ <i>R</i> (int) = 0.1074]                               |                        |
| Theta range for data collection                     | 3.02 to 27.46°                                                |                        |
| Index ranges                                        | -13 ≤ <i>h</i> ≤ 13, -11 ≤ <i>k</i> ≤ 11, -16 ≤ <i>l</i> ≤ 16 |                        |
| Completeness to theta = 25.24°                      | 99.8%                                                         |                        |
| Absorption correction                               | Multi-scan                                                    |                        |
| Max. and min. transmission                          | 0.988 and 0.529                                               |                        |
| Final <i>R</i> indices [ <i>I</i> > 2σ( <i>I</i> )] | <i>R</i> 1 = 0.0522                                           |                        |
| <i>R</i> indices (all data)                         | <i>R</i> 1 = 0.0799, <i>wR</i> 2 = 0.1193                     |                        |
| Refinement method                                   | Full-matrix least-squares on <i>F</i> <sup>2</sup>            |                        |
| Data / restraints / parameters                      | 2782 / 0 / 267                                                |                        |
| Goodness-of-fit on <i>F</i> <sup>2</sup>            | 1.044                                                         |                        |
| Largest diff. peak and hole                         | 0.32 and -0.27 e/Å <sup>-3</sup>                              |                        |

---

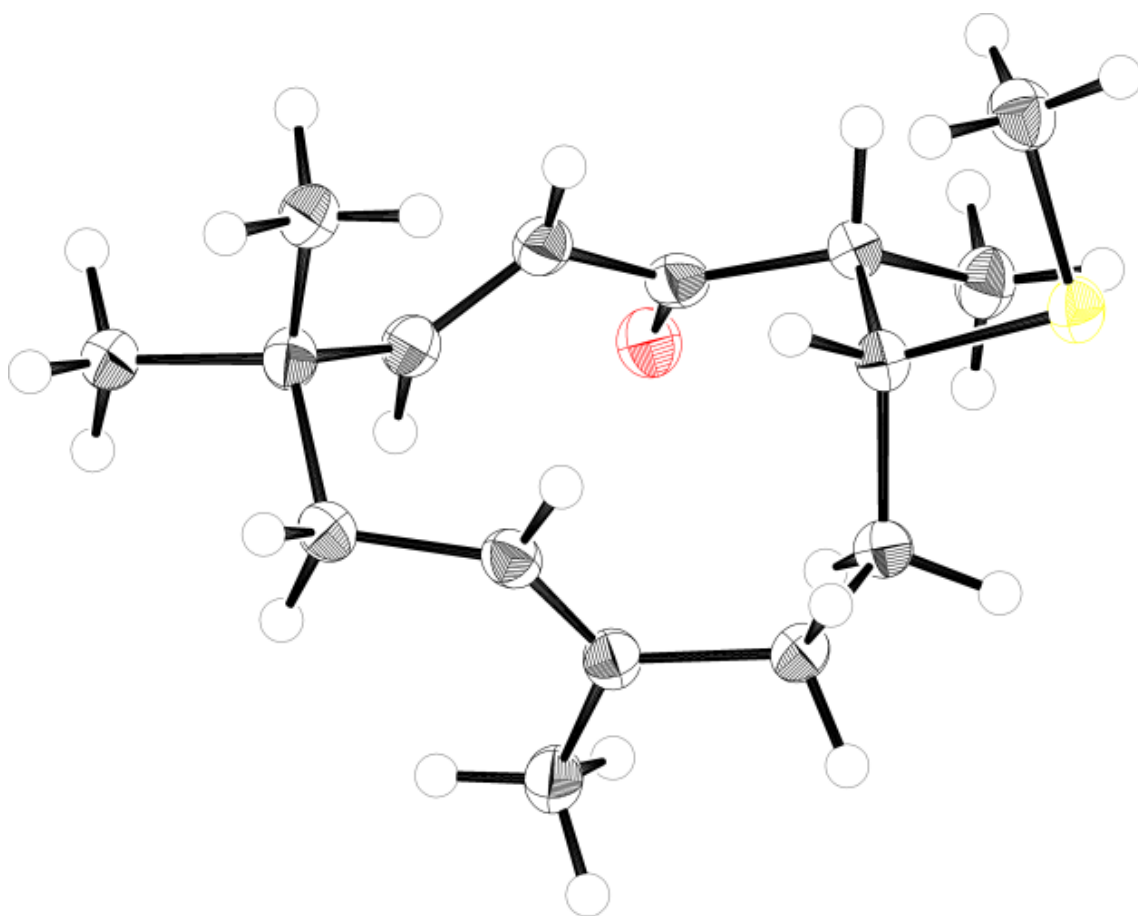

**Figure S85.** ORTEP diagram of (2*RS*,3*SR*)-11. The ellipsoid contour of probability level is 50%.

**Table S13.** Crystal data and structure refinement for (2*RS*,3*SR*)-11.

---

|                                                     |                                                             |                            |
|-----------------------------------------------------|-------------------------------------------------------------|----------------------------|
| CCDC code                                           | 2067499                                                     |                            |
| Chemical formula                                    | C <sub>16</sub> H <sub>26</sub> O <sub>8</sub>              |                            |
| Formula weight                                      | 266.44                                                      |                            |
| Crystal system                                      | Monoclinic                                                  |                            |
| Space group                                         | <i>P</i> 2 <sub>1</sub> / <i>n</i>                          |                            |
| Unit cell dimensions                                | <i>a</i> = 5.686(3) Å                                       | $\alpha = 90^\circ$        |
|                                                     | <i>b</i> = 26.359(13) Å                                     | $\beta = 93.343(17)^\circ$ |
|                                                     | <i>c</i> = 10.269(5) Å                                      | $\gamma = 90^\circ$        |
| Volume                                              | 1536.5(12) Å <sup>3</sup>                                   |                            |
| <i>Z</i>                                            | 4                                                           |                            |
| Density (calculated)                                | 1.152 g/cm <sup>3</sup>                                     |                            |
| Temperature                                         | 93(2) K                                                     |                            |
| Wavelength                                          | 0.71075 Å                                                   |                            |
| Absorption coefficient                              | 1.990 cm <sup>-1</sup>                                      |                            |
| <i>F</i> (000)                                      | 584                                                         |                            |
| Reflections collected                               | 11689                                                       |                            |
| Independent reflections                             | 2782 [ <i>R</i> (int) = 0.1662]                             |                            |
| Theta range for data collection                     | 3.06 to 28.79°                                              |                            |
| Index ranges                                        | -6 ≤ <i>h</i> ≤ 6, -31 ≤ <i>k</i> ≤ 31, -12 ≤ <i>l</i> ≤ 12 |                            |
| Completeness to theta = 25.24°                      | 99.9%                                                       |                            |
| Absorption correction                               | Multi-scan                                                  |                            |
| Max. and min. transmission                          | 0.976 and 0.032                                             |                            |
| Final <i>R</i> indices [ <i>I</i> > 2σ( <i>I</i> )] | <i>R</i> 1 = 0.0903                                         |                            |
| <i>R</i> indices (all data)                         | <i>R</i> 1 = 0.1212, <i>wR</i> 2 = 0.1694                   |                            |
| Refinement method                                   | Full-matrix least-squares on <i>F</i> <sup>2</sup>          |                            |
| Data / restraints / parameters                      | 2781 / 0 / 267                                              |                            |
| Goodness-of-fit on <i>F</i> <sup>2</sup>            | 1.082                                                       |                            |
| Largest diff. peak and hole                         | 0.43 and -0.32 e/Å <sup>-3</sup>                            |                            |
| Flack parameter                                     |                                                             |                            |

---

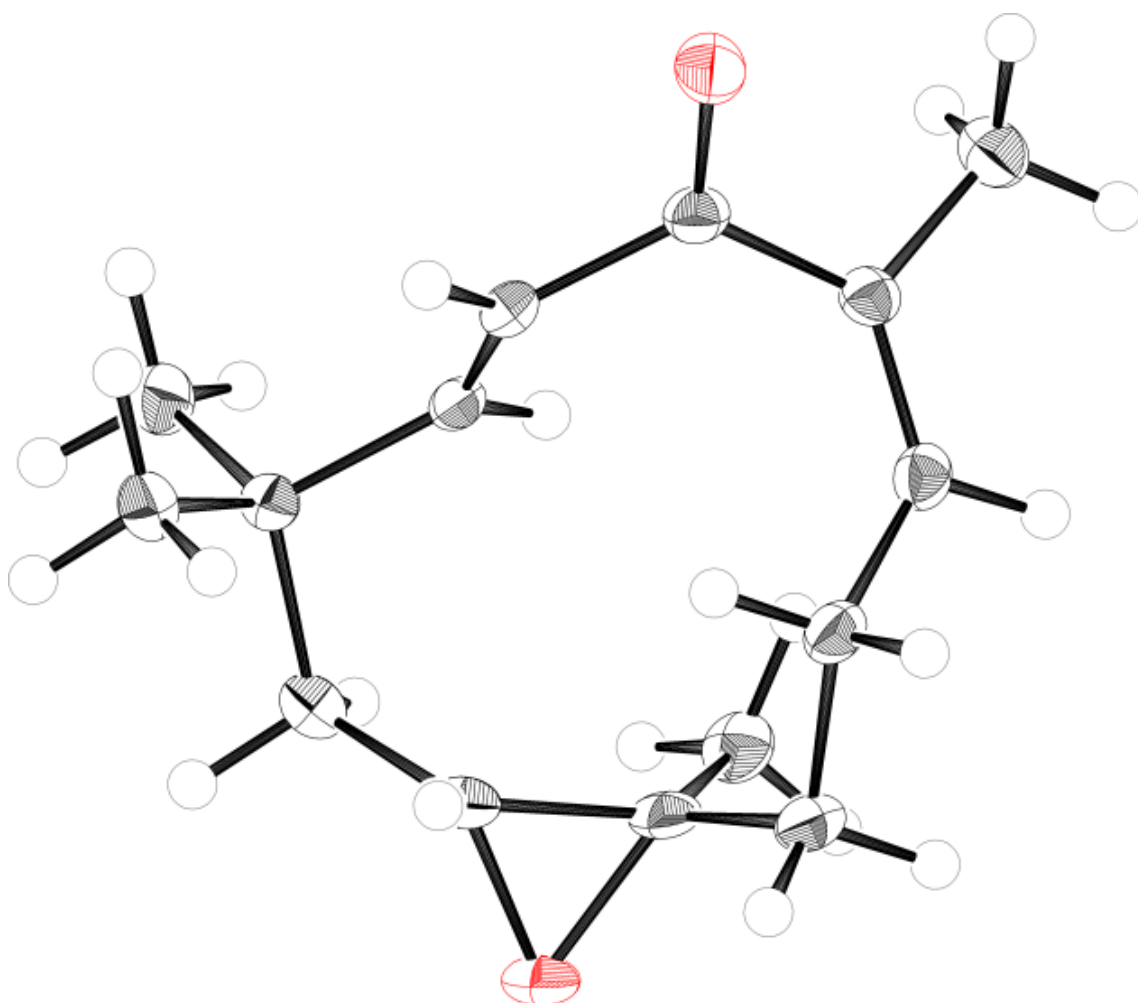

**Figure S86.** ORTEP diagram of **12**. The ellipsoid contour of probability level is 50%.



**Table S14.** Crystal data and structure refinement for **12**.

---

|                                                     |                                                               |                     |
|-----------------------------------------------------|---------------------------------------------------------------|---------------------|
| CCDC code                                           | 2067501                                                       |                     |
| Chemical formula                                    | C <sub>15</sub> H <sub>22</sub> O <sub>2</sub>                |                     |
| Formula weight                                      | 234.34                                                        |                     |
| Crystal system                                      | Orthorhombic                                                  |                     |
| Space group                                         | <i>P</i> 2 <sub>1</sub> 2 <sub>1</sub> 2 <sub>1</sub>         |                     |
| Unit cell dimensions                                | <i>a</i> = 8.183(4) Å                                         | $\alpha = 90^\circ$ |
|                                                     | <i>b</i> = 9.828(3) Å                                         | $\beta = 90^\circ$  |
|                                                     | <i>c</i> = 16.544(5) Å                                        | $\gamma = 90^\circ$ |
| Volume                                              | 1330.6(8) Å <sup>3</sup>                                      |                     |
| <i>Z</i>                                            | 4                                                             |                     |
| Density (calculated)                                | 1.170 g/cm <sup>3</sup>                                       |                     |
| Temperature                                         | 103(2) K                                                      |                     |
| Wavelength                                          | 0.71075 Å                                                     |                     |
| Absorption coefficient                              | 0.754 cm <sup>-1</sup>                                        |                     |
| <i>F</i> (000)                                      | 512                                                           |                     |
| Reflections collected                               | 11310                                                         |                     |
| Independent reflections                             | 2536 [ <i>R</i> (int) = 0.0560]                               |                     |
| Theta range for data collection                     | 3.22 to 27.48°                                                |                     |
| Index ranges                                        | -10 ≤ <i>h</i> ≤ 10, -12 ≤ <i>k</i> ≤ 12, -19 ≤ <i>l</i> ≤ 20 |                     |
| Completeness to theta = 25.24°                      | 99.8%                                                         |                     |
| Absorption correction                               | Multi-scan                                                    |                     |
| Max. and min. transmission                          | 0.992 and 0.627                                               |                     |
| Final <i>R</i> indices [ <i>I</i> > 2σ( <i>I</i> )] | <i>R</i> 1 = 0.0370, <i>wR</i> 2 = 0.0721                     |                     |
| <i>R</i> indices (all data)                         | <i>R</i> 1 = 0.0457, <i>wR</i> 2 = 0.0758                     |                     |
| Refinement method                                   | Full-matrix least-squares on <i>F</i> <sup>2</sup>            |                     |
| Data / restraints / parameters                      | 2536 / 0 / 242                                                |                     |
| Goodness-of-fit on <i>F</i> <sup>2</sup>            | 1.033                                                         |                     |
| Largest diff. peak and hole                         | 0.19 and -0.14 e/Å <sup>-3</sup>                              |                     |
| Flack parameter                                     | -0.1(13)                                                      |                     |

---

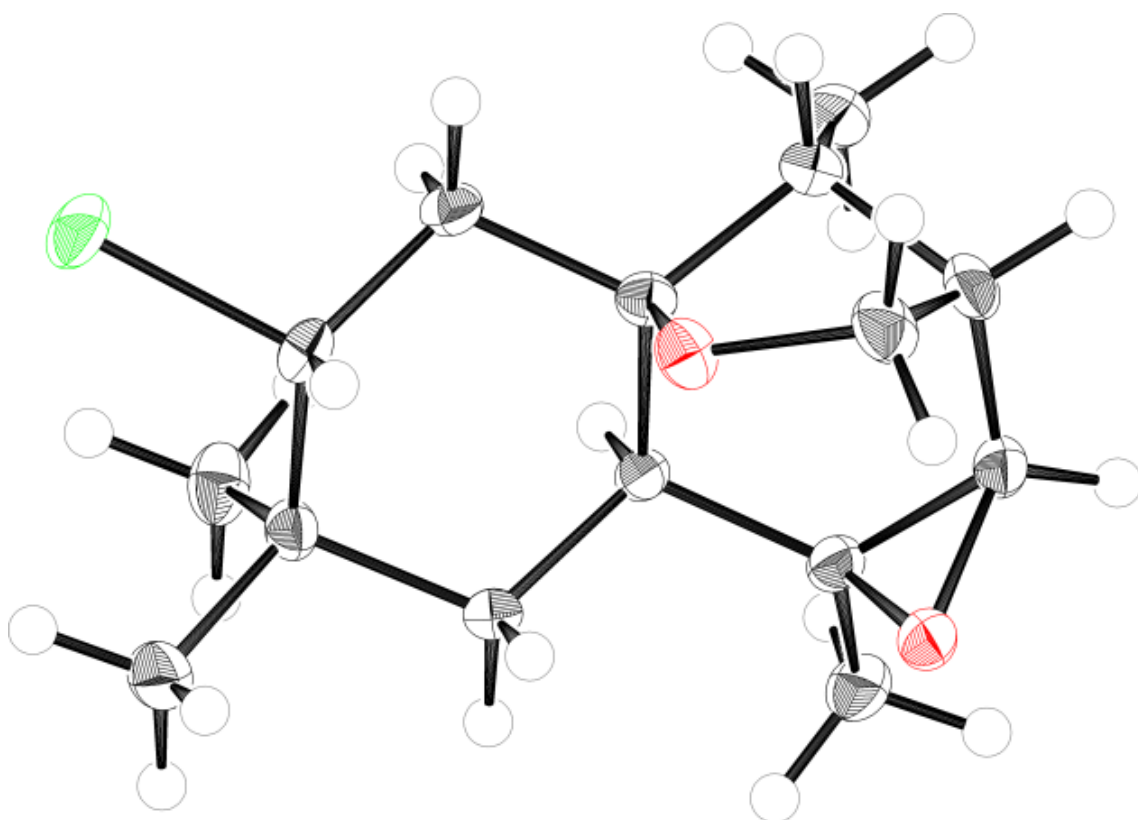

**Figure S87.** ORTEP diagram of **14**. The ellipsoid contour of probability level is 50%.

**Table S15.** Crystal data and structure refinement for **14**.

---

|                                                     |                                                               |                         |
|-----------------------------------------------------|---------------------------------------------------------------|-------------------------|
| CCDC code                                           | 2067500                                                       |                         |
| Chemical formula                                    | C <sub>15</sub> H <sub>23</sub> ClO <sub>2</sub>              |                         |
| Formula weight                                      | 270.80                                                        |                         |
| Crystal system                                      | Monoclinic                                                    |                         |
| Space group                                         | <i>P</i> 2 <sub>1</sub> / <i>c</i>                            |                         |
| Unit cell dimensions                                | <i>a</i> = 9.336(2) Å                                         | <i>α</i> = 90°          |
|                                                     | <i>b</i> = 12.665(4) Å                                        | <i>β</i> = 104.355(14)° |
|                                                     | <i>c</i> = 12.308(4) Å                                        | <i>γ</i> = 90°          |
| Volume                                              | 1409.9(8) Å <sup>3</sup>                                      |                         |
| <i>Z</i>                                            | 4                                                             |                         |
| Density (calculated)                                | 1.276 g/cm <sup>3</sup>                                       |                         |
| Temperature                                         | 103(2) K                                                      |                         |
| Wavelength                                          | 0.71075 Å                                                     |                         |
| Absorption coefficient                              | 2.634 cm <sup>-1</sup>                                        |                         |
| <i>F</i> (000)                                      | 584                                                           |                         |
| Reflections collected                               | 11200                                                         |                         |
| Independent reflections                             | 2564 [ <i>R</i> (int) = 0.0437]                               |                         |
| Theta range for data collection                     | 3.15 to 27.45°                                                |                         |
| Index ranges                                        | -11 ≤ <i>h</i> ≤ 11, -15 ≤ <i>k</i> ≤ 15, -14 ≤ <i>l</i> ≤ 14 |                         |
| Completeness to theta = 25.24°                      | 99.8%                                                         |                         |
| Absorption correction                               | Multi-scan                                                    |                         |
| Max. and min. transmission                          | 0.974 and 0.723                                               |                         |
| Final <i>R</i> indices [ <i>I</i> > 2σ( <i>I</i> )] | <i>R</i> 1 = 0.0387, <i>wR</i> 2 = 0.0904                     |                         |
| <i>R</i> indices (all data)                         | <i>R</i> 1 = 0.0466, <i>wR</i> 2 = 0.0945                     |                         |
| Refinement method                                   | Full-matrix least-squares on <i>F</i> <sup>2</sup>            |                         |
| Data / restraints / parameters                      | 2564 / 0 / 255                                                |                         |
| Goodness-of-fit on <i>F</i> <sup>2</sup>            | 1.046                                                         |                         |
| Largest diff. peak and hole                         | 0.39 and -0.18 e/Å <sup>-3</sup>                              |                         |

---

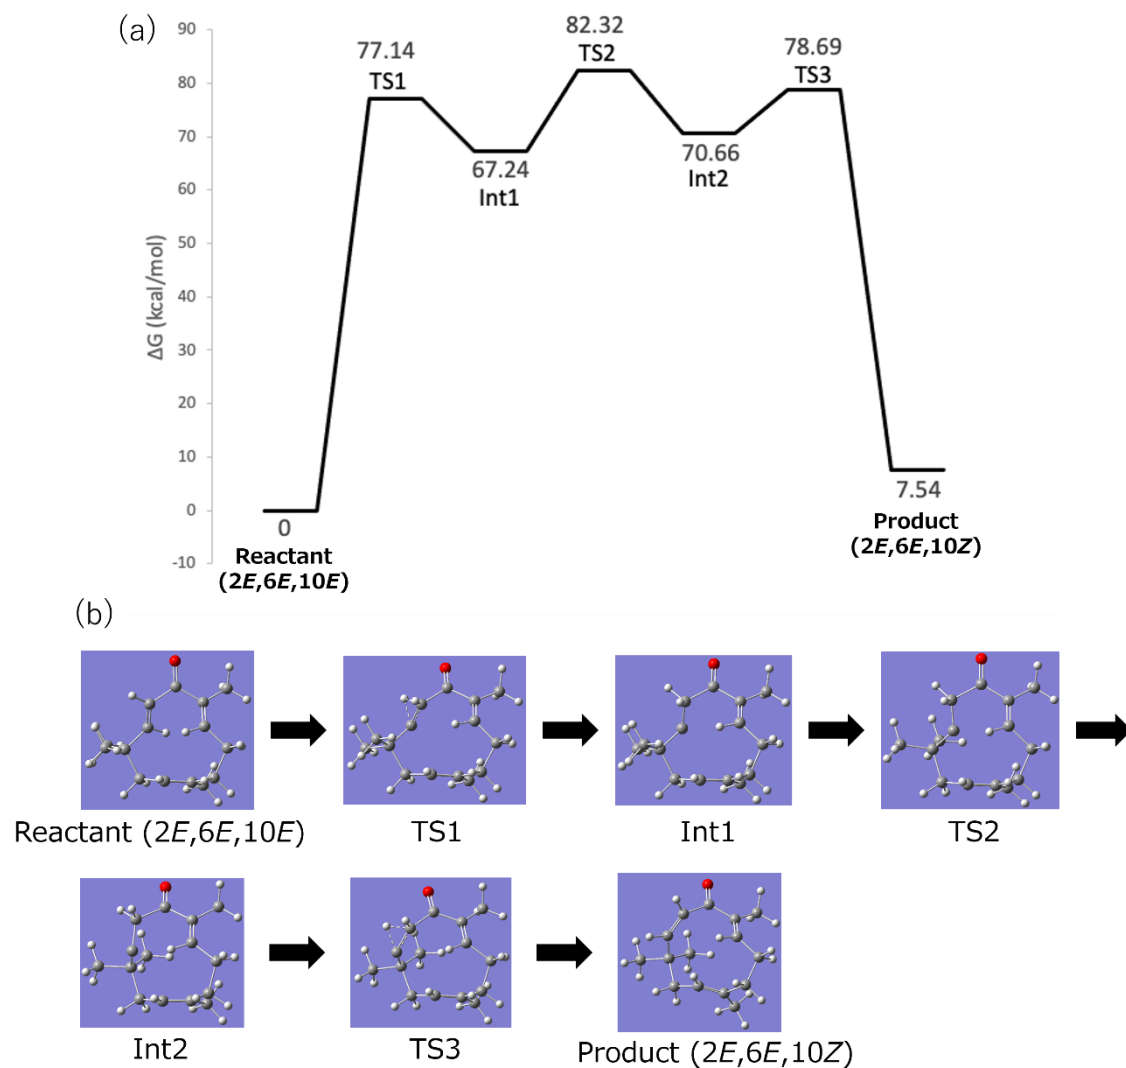

**Figure S88.** (a) Energy profile for the ( $2E,6E,10E$ ) to ( $2E,6E,10Z$ )-isomer, derived from the B3LYP/6-31G(d) ( $T = 308.15$  K) calculation. (b) Optimized geometries along the reaction path for the ( $2E,6E,10E$ ) to ( $2E,6E,10Z$ )-isomer at B3LYP/6-31G(d) level in gas phase.

**Table S16.** Cartesian coordinates and Gibbs free energies of (2E,6E,10E)-, (2E,6E,10Z)-, (2Z,6E,10E)-, (2Z,6Z,10E)-, and (2Z,6E,10Z)-zerumbone at the B3LYP/6-31G(d) level at 308.15 K in Gas phase (Figure 6).

(2E,6E,10E)-zerumbone

| Atom | coordinates (Å) |          |          |
|------|-----------------|----------|----------|
|      | X               | Y        | Z        |
| C    | 1.29442         | -2.10051 | -0.13654 |
| O    | 1.80836         | -3.21153 | -0.07238 |
| C    | 2.10733         | -0.84147 | 0.03893  |
| C    | -0.17278        | -1.92588 | -0.38461 |
| H    | -0.62736        | -2.6277  | -1.08088 |
| C    | 1.7663          | 0.23483  | -0.69611 |
| H    | 0.94374         | 0.09912  | -1.39177 |
| C    | -0.87954        | -0.97999 | 0.25441  |
| H    | -0.34166        | -0.3856  | 0.98993  |
| C    | 3.28348         | -0.94181 | 0.97436  |
| H    | 3.89563         | -0.03607 | 0.97235  |
| H    | 3.91014         | -1.78944 | 0.6753   |
| H    | 2.96197         | -1.14334 | 2.00453  |
| C    | 2.27222         | 1.65058  | -0.64874 |
| H    | 3.0216          | 1.83375  | -1.43312 |
| H    | 2.76845         | 1.85982  | 0.30562  |
| C    | -2.31983        | -0.54664 | 0.06901  |
| C    | 1.08282         | 2.63948  | -0.87765 |
| H    | 1.43838         | 3.66251  | -0.69344 |
| H    | 0.79202         | 2.58679  | -1.93396 |
| C    | -2.33634        | 1.03005  | 0.18264  |
| H    | -2.31957        | 1.29224  | 1.24572  |
| H    | -3.30015        | 1.38313  | -0.21053 |
| C    | -0.1182         | 2.31098  | -0.00707 |
| C    | -1.1868         | 1.68842  | -0.53893 |
| H    | -1.18235        | 1.53936  | -1.62009 |
| C    | -3.19379        | -1.12416 | 1.20568  |
| H    | -3.25709        | -2.21545 | 1.13259  |
| H    | -4.21164        | -0.71782 | 1.15347  |
| H    | -2.78212        | -0.8764  | 2.191    |
| C    | -2.88818        | -0.99433 | -1.28834 |
| H    | -3.92431        | -0.65374 | -1.3992  |
| H    | -2.88963        | -2.08638 | -1.37817 |
| H    | -2.30592        | -0.59208 | -2.12452 |
| C    | 0.05423         | 2.63074  | 1.45864  |
| H    | -0.84097        | 2.43374  | 2.05277  |
| H    | 0.31254         | 3.69042  | 1.58855  |
| H    | 0.87943         | 2.05364  | 1.89866  |

Sum of electronic and thermal Free Energies  
= -659.724081 a.u.

(2E,6E,10Z)-zerumbone

| Atom | coordinates (Å) |         |         |
|------|-----------------|---------|---------|
|      | X               | Y       | Z       |
| C    | -0.0176         | 1.90391 | -0.1512 |
| O    | 0.38354         | 2.55301 | 0.81132 |

|   |          |          |          |
|---|----------|----------|----------|
| C | -1.44698 | 1.48714  | -0.22895 |
| C | 0.9499   | 1.46372  | -1.22011 |
| H | 0.84536  | 2.00556  | -2.16176 |
| C | -1.77284 | 0.51253  | -1.10357 |
| H | -1.02033 | 0.25688  | -1.84752 |
| C | 1.92506  | 0.5475   | -1.13818 |
| H | 2.55014  | 0.45668  | -2.02825 |
| C | -2.33594 | 2.03097  | 0.85985  |
| H | -3.37148 | 1.7001   | 0.74754  |
| H | -1.97526 | 1.74045  | 1.85282  |
| H | -2.32285 | 3.12671  | 0.8416   |
| C | -2.89659 | -0.47825 | -1.02242 |
| H | -3.60466 | -0.21944 | -0.22995 |
| H | -3.46335 | -0.5326  | -1.96143 |
| C | 2.36263  | -0.38033 | -0.0001  |
| C | -2.26291 | -1.89491 | -0.74059 |
| H | -1.81893 | -2.26433 | -1.67276 |
| H | -3.0679  | -2.58882 | -0.46523 |
| C | 1.19784  | -1.02131 | 0.81773  |
| H | 1.6517   | -1.78676 | 1.46543  |
| H | 0.78458  | -0.26688 | 1.49808  |
| C | -1.19345 | -1.78858 | 0.33061  |
| C | 0.08387  | -1.5913  | -0.03277 |
| H | 0.32121  | -1.71054 | -1.09001 |
| C | 3.21395  | -1.5134  | -0.6164  |
| H | 4.06106  | -1.10627 | -1.18151 |
| H | 3.61675  | -2.16235 | 0.16963  |
| H | 2.62787  | -2.13987 | -1.29934 |
| C | 3.24713  | 0.4409   | 0.96981  |
| H | 3.60593  | -0.19185 | 1.79204  |
| H | 4.12384  | 0.84684  | 0.45159  |
| H | 2.6817   | 1.27984  | 1.38561  |
| C | -1.68687 | -1.69184 | 1.75242  |
| H | -0.8801  | -1.51025 | 2.46713  |
| H | -2.43014 | -0.89191 | 1.87274  |
| H | -2.18654 | -2.62567 | 2.0463   |

Sum of electronic and thermal Free Energies  
= -659.712062 a.u.

(2Z,6E,10E)-zerumbone

| Atom | coordinates (Å) |          |          |
|------|-----------------|----------|----------|
|      | X               | Y        | Z        |
| C    | 1.62313         | -1.60621 | -0.36749 |
| O    | 2.31002         | -2.518   | -0.817   |
| C    | 2.29985         | -0.47264 | 0.37771  |
| C    | 0.15065         | -1.62065 | -0.54032 |
| H    | -0.1958         | -2.25135 | -1.35575 |
| C    | 2.27395         | 0.80924  | -0.03141 |
| H    | 2.88278         | 1.5168   | 0.53759  |
| C    | -0.70032        | -0.96085 | 0.2608   |
| H    | -0.27438        | -0.39965 | 1.09164  |
| C    | 3.16921         | -0.93004 | 1.52652  |
| H    | 3.7121          | -0.09274 | 1.97605  |
| H    | 2.57618         | -1.41732 | 2.31215  |
| H    | 3.89336         | -1.67153 | 1.17057  |
| C    | 1.6014          | 1.40137  | -1.24447 |
| H    | 2.39069         | 1.75257  | -1.92717 |
| H    | 1.03886         | 0.63523  | -1.78589 |
| C    | -2.2063         | -0.83944 | 0.13556  |
| C    | 0.65724         | 2.60555  | -0.96078 |
| H    | 0.28332         | 2.96695  | -1.92696 |
| H    | 1.23582         | 3.42802  | -0.51961 |

|   |          |          |          |
|---|----------|----------|----------|
| C | -2.53722 | 0.70374  | 0.20625  |
| H | -3.55461 | 0.85235  | -0.18038 |
| H | -2.5541  | 1.0047   | 1.25867  |
| C | -0.49899 | 2.21776  | -0.05402 |
| C | -1.52257 | 1.50997  | -0.55969 |
| H | -1.52766 | 1.35032  | -1.63981 |
| C | -2.7366  | -1.43592 | -1.17867 |
| H | -2.51917 | -2.50768 | -1.24694 |
| H | -3.82449 | -1.31513 | -1.23498 |
| H | -2.29659 | -0.9485  | -2.05542 |
| C | -2.88439 | -1.54894 | 1.32892  |
| H | -3.96563 | -1.36395 | 1.31966  |
| H | -2.72397 | -2.63206 | 1.28526  |
| H | -2.48997 | -1.18734 | 2.28586  |
| C | -0.32155 | 2.56743  | 1.40324  |
| H | -1.17043 | 2.27833  | 2.02779  |
| H | 0.57945  | 2.09259  | 1.8149   |
| H | -0.18073 | 3.65116  | 1.51582  |

Sum of electronic and thermal Free Energies  
= -659.724964

(2Z,6Z,10E)-zerumbone

| Atom | coordinates (Å) |          |          |
|------|-----------------|----------|----------|
|      | X               | Y        | Z        |
| C    | -2.19317        | -0.62804 | 0.78356  |
| O    | -3.03228        | -0.99711 | 1.59934  |
| C    | -2.59751        | 0.31621  | -0.32623 |
| C    | -0.79861        | -1.13248 | 0.87296  |
| H    | -0.52663        | -1.52395 | 1.8505   |
| C    | -1.94608        | 1.46309  | -0.59563 |
| H    | -2.36394        | 2.09765  | -1.38033 |
| C    | 0.03739         | -1.18809 | -0.17464 |
| H    | -0.34025        | -0.83106 | -1.13288 |
| C    | -3.88938        | -0.05575 | -1.01497 |
| H    | -4.18863        | 0.70627  | -1.74109 |
| H    | -4.68552        | -0.17208 | -0.27166 |
| H    | -3.80361        | -1.01692 | -1.53903 |
| C    | -0.72582        | 2.018    | 0.09166  |
| H    | -0.51043        | 1.44844  | 0.99763  |
| H    | -0.94615        | 3.04434  | 0.41465  |
| C    | 1.4643          | -1.68112 | -0.22158 |
| C    | 0.55156         | 2.03221  | -0.81319 |
| H    | 0.45983         | 1.25748  | -1.57801 |
| H    | 0.60096         | 2.99017  | -1.34961 |
| C    | 2.34072         | -0.54104 | -0.85482 |
| H    | 1.90661         | -0.28723 | -1.83028 |
| H    | 3.32596         | -0.97736 | -1.06871 |
| C    | 1.81549         | 1.83001  | -0.00462 |
| C    | 2.54619         | 0.70162  | -0.01948 |
| H    | 3.41107         | 0.66811  | 0.64396  |
| C    | 1.51685         | -2.90016 | -1.17362 |
| H    | 0.90713         | -3.72456 | -0.78788 |
| H    | 2.54766         | -3.25864 | -1.28097 |
| H    | 1.1441          | -2.64435 | -2.17284 |
| C    | 2.00667         | -2.08021 | 1.15821  |
| H    | 3.05198         | -2.40103 | 1.07771  |
| H    | 1.43571         | -2.91373 | 1.58251  |
| H    | 1.96307         | -1.24364 | 1.86286  |
| C    | 2.20154         | 2.98801  | 0.88553  |
| H    | 3.10768         | 2.77536  | 1.46138  |
| H    | 1.40093         | 3.23419  | 1.5963   |
| H    | 2.37995         | 3.89592  | 0.29211  |

Sum of electronic and thermal Free Energies  
= -659.729475 a.u.

(2Z,6E,10Z)-zerumbone

| Atom | coordinates (Å) |          |          |
|------|-----------------|----------|----------|
|      | X               | Y        | Z        |
| C    | 1.6552          | -0.89773 | 0.82092  |
| O    | 2.29248         | -1.90182 | 1.1202   |
| C    | 2.23076         | 0.04514  | -0.19593 |
| C    | 0.33467         | -0.68076 | 1.51621  |
| H    | 0.4591          | -0.36907 | 2.55449  |
| C    | 1.9692          | 1.36348  | -0.32356 |
| H    | 2.51678         | 1.86666  | -1.12432 |
| C    | -0.907          | -0.97784 | 1.10967  |
| H    | -1.69051        | -0.82441 | 1.85472  |
| C    | 3.2816          | -0.60657 | -1.07185 |
| H    | 3.67305         | 0.09836  | -1.81124 |
| H    | 4.11185         | -0.97656 | -0.46155 |
| H    | 2.87648         | -1.47854 | -1.59879 |
| C    | 1.11333         | 2.31725  | 0.46195  |
| H    | 0.7283          | 1.86583  | 1.37994  |
| H    | 1.76371         | 3.15113  | 0.76434  |
| C    | -1.45369        | -1.4806  | -0.21743 |
| C    | -0.07339        | 2.89458  | -0.37742 |
| H    | 0.25132         | 3.02624  | -1.41706 |
| H    | -0.32577        | 3.89096  | 0.00642  |
| C    | -2.23154        | -0.29927 | -0.91563 |
| H    | -2.60344        | -0.67492 | -1.87892 |
| H    | -3.11511        | -0.06431 | -0.31158 |
| C    | -1.26779        | 1.96917  | -0.28677 |
| C    | -1.3647         | 0.91222  | -1.10789 |
| H    | -0.63368        | 0.84028  | -1.91337 |
| C    | -0.37911        | -2.04023 | -1.16556 |
| H    | 0.18872         | -2.84409 | -0.68606 |
| H    | -0.85395        | -2.45094 | -2.06494 |
| H    | 0.3282          | -1.27197 | -1.48808 |
| C    | -2.46872        | -2.60603 | 0.08646  |
| H    | -2.95116        | -2.94819 | -0.83713 |
| H    | -1.9732         | -3.46706 | 0.54921  |
| H    | -3.25563        | -2.26269 | 0.7691   |
| C    | -2.19462        | 2.26004  | 0.86879  |
| H    | -3.02812        | 1.55849  | 0.94627  |
| H    | -1.65552        | 2.24244  | 1.82627  |
| H    | -2.61644        | 3.26981  | 0.76893  |

Sum of electronic and thermal Free Energies  
= -659.714591 a.u.

**Table S16.** Cartesian coordinates and Gibbs free energies of TS1, Int1, TS2, Int2, TS3, TS4, Int4, TS5, Int5, TS6, Int6, and TS7 at the B3LYP/6-31G(d) level at 308.15 K in Gas phase (Figure 7).

TS1

| Atom | coordinates (Å) |          |        |
|------|-----------------|----------|--------|
|      | X               | Y        | Z      |
| C    | 0.95768         | -2.24693 | -0.141 |

|   |          |          |          |
|---|----------|----------|----------|
| O | 1.40771  | -3.37466 | -0.23322 |
| C | 1.88903  | -1.05093 | 0.16139  |
| C | -0.47498 | -1.88822 | -0.40706 |
| H | -0.92742 | -2.34795 | -1.28226 |
| C | 1.85162  | -0.07944 | -0.85479 |
| H | 1.02279  | -0.16557 | 0.21171  |
| C | -1.12706 | -0.9953  | 0.35091  |
| H | -0.62445 | -0.63243 | 1.25169  |
| C | 2.87569  | -1.25888 | 1.29922  |
| H | 3.52637  | -0.39344 | 1.44597  |
| H | 3.49362  | -2.12544 | 1.04068  |
| H | 2.36963  | -1.49481 | 2.24213  |
| C | 2.57723  | 1.22564  | -0.69748 |
| H | 3.35145  | 1.27055  | -1.47642 |
| H | 3.09408  | 1.40206  | 0.26501  |
| C | -2.42036 | -0.25915 | 0.08058  |
| C | 1.54932  | 2.37726  | -0.97174 |
| H | 2.04978  | 3.34417  | -0.82281 |
| H | 1.2548   | 2.31257  | -2.02348 |
| C | -2.05768 | 1.27791  | 0.17734  |
| H | -1.98448 | 1.5442   | 1.23785  |
| H | -2.91635 | 1.83843  | -0.22243 |
| C | 0.31124  | 2.27604  | -0.08861 |
| C | -0.79093 | 1.65552  | -0.55466 |
| H | -0.74849 | 1.31597  | -1.58849 |
| C | -3.46392 | -0.58057 | 1.17189  |
| H | -3.78299 | -1.62706 | 1.11138  |
| H | -4.35165 | 0.05322  | 1.05646  |
| H | -3.05801 | -0.40996 | 2.1762   |
| C | -3.00324 | -0.59245 | -1.30169 |
| H | -3.92531 | -0.02477 | -1.47161 |
| H | -3.25173 | -1.65729 | -1.37833 |
| H | -2.30329 | -0.35339 | -2.10896 |
| C | 0.4697   | 2.83344  | 1.3059   |
| H | -0.39495 | 2.65074  | 1.94918  |
| H | 0.62923  | 3.91998  | 1.26738  |
| H | 1.35562  | 2.41377  | 1.80379  |

Sum of electronic and thermal Free Energies

= -659.596401 a.u.

Harmonic frequencies = 867.3589i (cm<sup>-1</sup>)

### Int1

| Atom | coordinates (Å) |          |          |
|------|-----------------|----------|----------|
|      | X               | Y        | Z        |
| C    | 1.62727         | -1.8341  | 0.07541  |
| O    | 2.32998         | -2.81523 | -0.10519 |
| C    | 2.21922         | -0.45535 | 0.44686  |
| C    | 0.16301         | -1.89113 | -0.17385 |
| H    | -0.13266        | -2.66335 | -0.87994 |
| C    | 1.90231         | 0.51959  | -0.63442 |
| H    | 1.89477         | -0.15874 | 1.46347  |
| C    | -0.73793        | -1.06724 | 0.38242  |
| H    | -0.39528        | -0.3571  | 1.13402  |
| C    | 3.77377         | -0.51178 | 0.43932  |
| H    | 4.19796         | 0.35576  | 0.95162  |
| H    | 4.15711         | -0.54955 | -0.58502 |
| H    | 4.08491         | -1.43232 | 0.93955  |
| C    | 1.87869         | 1.94464  | -0.20477 |
| H    | 2.80725         | 2.35305  | -0.64573 |
| H    | 1.92798         | 2.14126  | 0.88446  |
| C    | -2.21355        | -0.94823 | 0.05094  |
| C    | 0.68529         | 2.71774  | -0.8438  |

|   |          |          |          |
|---|----------|----------|----------|
| H | 0.85601  | 3.79513  | -0.71836 |
| H | 0.67376  | 2.49734  | -1.91547 |
| C | -2.5226  | 0.59086  | -0.11999 |
| H | -2.75432 | 1.00887  | 0.86469  |
| H | -3.43839 | 0.68523  | -0.72054 |
| C | -0.62368 | 2.30319  | -0.19314 |
| C | -1.37367 | 1.33629  | -0.74916 |
| H | -1.048   | 0.95391  | -1.71711 |
| C | -3.05702 | -1.49601 | 1.22431  |
| H | -2.91656 | -2.57686 | 1.33708  |
| H | -4.1236  | -1.30652 | 1.05117  |
| H | -2.78068 | -1.019   | 2.17211  |
| C | -2.58172 | -1.70305 | -1.23752 |
| H | -3.64989 | -1.58212 | -1.45085 |
| H | -2.38473 | -2.77691 | -1.14553 |
| H | -2.01853 | -1.33097 | -2.10035 |
| C | -0.91573 | 2.9836   | 1.12283  |
| H | -1.82824 | 2.62799  | 1.6063   |
| H | -1.02362 | 4.06644  | 0.97005  |
| H | -0.08698 | 2.8562   | 1.83317  |

Sum of electronic and thermal Free Energies

= -659.613590 a.u.

### TS2

| Atom | coordinates (Å) |          |          |
|------|-----------------|----------|----------|
|      | X               | Y        | Z        |
| C    | 1.87657         | -1.71177 | 0.05976  |
| O    | 2.71669         | -2.56044 | -0.19432 |
| C    | 2.35824         | -0.25277 | 0.4272   |
| C    | 0.42296         | -1.98215 | -0.09878 |
| H    | 0.22181         | -2.78065 | -0.81005 |
| C    | 1.40087         | 0.73714  | -0.05466 |
| H    | 2.06783         | -0.1565  | 1.50284  |
| C    | -0.57458        | -1.24166 | 0.42161  |
| H    | -0.32777        | -0.50765 | 1.18014  |
| C    | 3.88697         | -0.09903 | 0.30655  |
| H    | 4.2055          | 0.86972  | 0.70547  |
| H    | 4.19361         | -0.15943 | -0.74242 |
| H    | 4.40972         | -0.89575 | 0.84149  |
| C    | 1.6001          | 2.17486  | -0.21197 |
| H    | 2.54074         | 2.51309  | -0.68605 |
| H    | 1.67021         | 2.54109  | 0.83318  |
| C    | -2.04487        | -1.22588 | 0.04552  |
| C    | 0.33632         | 2.84113  | -0.88823 |
| H    | 0.42475         | 3.93365  | -0.82014 |
| H    | 0.35857         | 2.58256  | -1.95302 |
| C    | -2.50294        | 0.28947  | -0.03689 |
| H    | -2.70912        | 0.64009  | 0.98073  |
| H    | -3.46713        | 0.29917  | -0.56766 |
| C    | -0.94387        | 2.33282  | -0.24872 |
| C    | -1.49302        | 1.19207  | -0.704   |
| H    | -1.06814        | 0.78468  | -1.62069 |
| C    | -2.87006        | -1.91208 | 1.15887  |
| H    | -2.64324        | -2.98283 | 1.20993  |
| H    | -3.94435        | -1.79904 | 0.96702  |
| H    | -2.65644        | -1.47481 | 2.14138  |
| C    | -2.31103        | -1.93276 | -1.29419 |
| H    | -3.37914        | -1.89425 | -1.53762 |
| H    | -2.02059        | -2.98849 | -1.25354 |
| H    | -1.75747        | -1.46562 | -2.11577 |
| C    | -1.37629        | 3.05989  | 1.0008   |
| H    | -2.26012        | 2.61982  | 1.47006  |

|   |          |         |         |
|---|----------|---------|---------|
| H | -1.61103 | 4.10972 | 0.77728 |
| H | -0.57395 | 3.07922 | 1.75465 |

Sum of electronic and thermal Free Energies

= -659.592489 a.u.

Harmonic frequencies = 232.0587i (cm<sup>-1</sup>)

### Int2

| Atom | coordinates (Å) |          |          |
|------|-----------------|----------|----------|
|      | X               | Y        | Z        |
| C    | 1.57662         | -1.6029  | -0.16918 |
| O    | 2.28441         | -2.22254 | -0.95551 |
| C    | 2.1785          | -0.60021 | 0.82816  |
| C    | 0.10134         | -1.70895 | -0.2809  |
| H    | -0.21228        | -2.3462  | -1.10384 |
| C    | 1.99379         | 0.86457  | 0.54109  |
| H    | 1.78414         | -0.79412 | 1.83646  |
| C    | -0.78962        | -0.99028 | 0.42172  |
| H    | -0.43139        | -0.37355 | 1.24718  |
| C    | 3.72504         | -0.77051 | 0.92124  |
| H    | 4.15062         | -0.04472 | 1.61815  |
| H    | 4.18668         | -0.65239 | -0.06152 |
| H    | 3.94624         | -1.78264 | 1.27051  |
| C    | 1.76186         | 1.25188  | -0.87472 |
| H    | 1.46956         | 0.46251  | -1.58559 |
| H    | 2.77678         | 1.58269  | -1.17779 |
| C    | -2.27435        | -0.84132 | 0.14527  |
| C    | 0.7997          | 2.47519  | -1.02178 |
| H    | 1.29223         | 3.37232  | -0.63232 |
| H    | 0.61537         | 2.63247  | -2.09127 |
| C    | -2.54481        | 0.70536  | -0.04653 |
| H    | -2.68019        | 1.15785  | 0.94042  |
| H    | -3.50182        | 0.81467  | -0.57545 |
| C    | -0.49903        | 2.21588  | -0.26987 |
| C    | -1.41679        | 1.38001  | -0.78422 |
| H    | -1.24904        | 1.01935  | -1.80088 |
| C    | -3.08005        | -1.34128 | 1.36466  |
| H    | -2.96765        | -2.42373 | 1.49433  |
| H    | -4.147          | -1.12377 | 1.23341  |
| H    | -2.74963        | -0.85351 | 2.28938  |
| C    | -2.71988        | -1.6103  | -1.10923 |
| H    | -3.79723        | -1.48206 | -1.26302 |
| H    | -2.52432        | -2.68413 | -1.01209 |
| H    | -2.20727        | -1.25564 | -2.00999 |
| C    | -0.5482         | 2.82938  | 1.1079   |
| H    | -1.45441        | 2.58537  | 1.66785  |
| H    | -0.48776        | 3.92404  | 1.03234  |
| H    | 0.32834         | 2.5064   | 1.68619  |

Sum of electronic and thermal Free Energies

= -659.612065 a.u.

### TS3

| Atom | coordinates (Å) |          |          |
|------|-----------------|----------|----------|
|      | X               | Y        | Z        |
| C    | 1.51988         | -1.64127 | -0.38112 |
| O    | 2.22993         | -2.37908 | -1.05283 |
| C    | 2.21096         | -0.59326 | 0.50266  |
| C    | 0.0454          | -1.66338 | -0.50142 |
| H    | -0.31076        | -2.20903 | -1.372   |
| C    | 2.42647         | 0.7556   | 0.12411  |

|   |          |          |          |
|---|----------|----------|----------|
| H | 1.53434  | 0.33768  | 1.02617  |
| C | -0.796   | -1.0081  | 0.31456  |
| H | -0.38373 | -0.52128 | 1.1991   |
| C | 2.96799  | -1.18792 | 1.6793   |
| H | 3.42458  | -0.38763 | 2.26739  |
| H | 3.76074  | -1.82725 | 1.27577  |
| H | 2.33168  | -1.81504 | 2.31544  |
| C | 1.78512  | 1.23919  | -1.15983 |
| H | 1.20866  | 0.49678  | -1.73535 |
| H | 2.65104  | 1.50466  | -1.78704 |
| C | -2.27462 | -0.74485 | 0.12847  |
| C | 0.91067  | 2.51405  | -0.99913 |
| H | 1.52041  | 3.31767  | -0.57125 |
| H | 0.59421  | 2.83727  | -1.9986  |
| C | -2.42858 | 0.82956  | 0.15612  |
| H | -2.43587 | 1.15761  | 1.20068  |
| H | -3.41693 | 1.07555  | -0.25704 |
| C | -0.3017  | 2.23805  | -0.11902 |
| C | -1.31958 | 1.508    | -0.60679 |
| H | -1.2695  | 1.24388  | -1.66483 |
| C | -3.06888 | -1.34606 | 1.30825  |
| H | -3.02942 | -2.44112 | 1.29276  |
| H | -4.1214  | -1.04325 | 1.25331  |
| H | -2.67246 | -1.00668 | 2.27259  |
| C | -2.81385 | -1.31138 | -1.19444 |
| H | -3.88355 | -1.09286 | -1.28782 |
| H | -2.69247 | -2.3996  | -1.24066 |
| H | -2.3053  | -0.87982 | -2.06305 |
| C | -0.18586 | 2.74338  | 1.29846  |
| H | -0.99421 | 2.41033  | 1.955    |
| H | -0.18852 | 3.8426   | 1.30274  |
| H | 0.77454  | 2.4426   | 1.73816  |

Sum of electronic and thermal Free Energies

= -659.603499 a.u.

Harmonic frequencies = 927.5737i (cm<sup>-1</sup>)

### TS4

| Atom | coordinates (Å) |          |          |
|------|-----------------|----------|----------|
|      | X               | Y        | Z        |
| C    | 2.20769         | -0.97648 | -0.422   |
| O    | 3.13777         | -1.60447 | -0.91807 |
| C    | 2.48585         | 0.24757  | 0.41948  |
| C    | 0.80863         | -1.43923 | -0.61761 |
| H    | 0.66531         | -2.08688 | -1.4799  |
| C    | 1.96919         | 1.4627   | 0.16073  |
| H    | 2.28933         | 2.28213  | 0.80797  |
| C    | -0.186          | -1.14412 | 0.23321  |
| H    | 0.04906         | -0.51453 | 1.08983  |
| C    | 3.51569         | 0.02689  | 1.50371  |
| H    | 3.74801         | 0.95875  | 2.02833  |
| H    | 4.43726         | -0.37357 | 1.06639  |
| H    | 3.17102         | -0.70698 | 2.24471  |
| C    | 1.09049         | 1.88945  | -0.98815 |
| H    | 0.79554         | 1.02697  | -1.59324 |
| H    | 1.69176         | 2.53427  | -1.64711 |
| C    | -1.65005        | -1.52143 | 0.12273  |
| C    | -0.17477        | 2.69069  | -0.58508 |
| H    | 0.13532         | 3.62167  | -0.0889  |
| H    | -0.68355        | 2.98482  | -1.52596 |
| C    | -2.4856         | -0.22539 | 0.43699  |
| H    | -2.43068        | -0.03621 | 1.51413  |
| H    | -3.53357        | -0.40657 | 0.16103  |



|   |          |          |          |
|---|----------|----------|----------|
| C | -1.01794 | 1.84292  | 0.34733  |
| C | -1.89754 | 0.97176  | -0.27885 |
| H | -2.03067 | 0.94946  | -1.37986 |
| C | -1.98544 | -2.57302 | 1.2065   |
| H | -1.46096 | -3.51359 | 1.006    |
| H | -3.06286 | -2.7787  | 1.22447  |
| H | -1.68993 | -2.22606 | 2.20305  |
| C | -2.01953 | -2.08426 | -1.2603  |
| H | -3.08922 | -2.3203  | -1.30053 |
| H | -1.47028 | -3.0086  | -1.46965 |
| H | -1.7978  | -1.37538 | -2.06548 |
| C | -2.66243 | 2.45333  | 0.51915  |
| H | -3.44538 | 2.45995  | -0.26364 |
| H | -2.29346 | 3.48059  | 0.55177  |
| H | -3.086   | 2.15624  | 1.47416  |

Sum of electronic and thermal Free Energies

= -659.598629 a.u.

Harmonic frequencies = 556.7423i (cm<sup>-1</sup>)

#### Int4

| Atom | coordinates (Å) |          |          |
|------|-----------------|----------|----------|
|      | X               | Y        | Z        |
| C    | 2.29826         | -0.85635 | -0.43689 |
| O    | 3.23081         | -1.4898  | -0.92117 |
| C    | 2.57371         | 0.37474  | 0.39153  |
| C    | 0.9019          | -1.32288 | -0.63543 |
| H    | 0.77016         | -1.97925 | -1.49293 |
| C    | 1.99342         | 1.56429  | 0.15468  |
| H    | 2.301           | 2.40445  | 0.78003  |
| C    | -0.09966        | -1.05656 | 0.22027  |
| H    | 0.1179          | -0.42947 | 1.08583  |
| C    | 3.65984         | 0.19991  | 1.42608  |
| H    | 3.88489         | 1.14339  | 1.93253  |
| H    | 4.57166         | -0.17469 | 0.94798  |
| H    | 3.37383         | -0.53877 | 2.18655  |
| C    | 1.03933         | 1.92826  | -0.95187 |
| H    | 0.80001         | 1.06478  | -1.57484 |
| H    | 1.53201         | 2.66194  | -1.60543 |
| C    | -1.53748        | -1.52268 | 0.12407  |
| C    | -0.2954         | 2.61055  | -0.48423 |
| H    | -0.00999        | 3.53496  | 0.03854  |
| H    | -0.85762        | 2.88283  | -1.39849 |
| C    | -2.47106        | -0.34742 | 0.54824  |
| H    | -2.39426        | -0.21065 | 1.63428  |
| H    | -3.50704        | -0.64422 | 0.33155  |
| C    | -0.9773         | 1.69077  | 0.46345  |
| C    | -2.17331        | 1.01906  | -0.09881 |
| H    | -2.20117        | 0.95303  | -1.20367 |
| C    | -1.74181        | -2.67918 | 1.1348   |
| H    | -1.14654        | -3.55448 | 0.85287  |
| H    | -2.79715        | -2.9775  | 1.16564  |
| H    | -1.44665        | -2.37995 | 2.14695  |
| C    | -1.90409        | -2.0202  | -1.28606 |
| H    | -2.955          | -2.33052 | -1.31433 |
| H    | -1.29956        | -2.88621 | -1.57685 |
| H    | -1.76044        | -1.24227 | -2.04402 |
| C    | -3.28606        | 2.04561  | 0.3083   |
| H    | -4.25534        | 1.63556  | 0.00585  |
| H    | -3.15317        | 3.01155  | -0.18813 |
| H    | -3.29569        | 2.20636  | 1.39064  |

Sum of electronic and thermal Free Energies

= -659.619102 a.u.

#### TS5

| Atom | coordinates (Å) |          |          |
|------|-----------------|----------|----------|
|      | X               | Y        | Z        |
| C    | 2.26645         | -0.80603 | -0.69683 |
| O    | 3.09137         | -1.36807 | -1.411   |
| C    | 2.70416         | 0.328    | 0.19742  |
| C    | 0.85682         | -1.27126 | -0.69371 |
| H    | 0.58505         | -1.87423 | -1.55683 |
| C    | 2.0846          | 1.52242  | 0.2653   |
| H    | 2.55869         | 2.27445  | 0.90132  |
| C    | -0.00039        | -1.03926 | 0.31056  |
| H    | 0.36619         | -0.46951 | 1.16513  |
| C    | 4.01077         | 0.0702   | 0.91254  |
| H    | 4.3374          | 0.94847  | 1.4775   |
| H    | 4.78583         | -0.19505 | 0.18568  |
| H    | 3.92761         | -0.77575 | 1.60761  |
| C    | 0.86451         | 2.0264   | -0.46166 |
| H    | 0.4789          | 1.27647  | -1.15216 |
| H    | 1.18523         | 2.87449  | -1.08346 |
| C    | -1.45605        | -1.42673 | 0.40607  |
| C    | -0.26273        | 2.54135  | 0.49991  |
| H    | 0.05153         | 2.44665  | 1.55396  |
| H    | -0.34746        | 3.63981  | 0.41324  |
| C    | -2.25928        | -0.12488 | 0.69928  |
| H    | -1.94711        | 0.25732  | 1.68342  |
| H    | -3.3207         | -0.3724  | 0.81918  |
| C    | -1.69678        | 2.13022  | 0.49466  |
| C    | -2.1471         | 1.02202  | -0.38563 |
| H    | -1.45089        | 0.69242  | -1.17395 |
| C    | -1.63298        | -2.36709 | 1.62418  |
| H    | -1.09962        | -3.31068 | 1.46595  |
| H    | -2.69355        | -2.59668 | 1.78198  |
| H    | -1.24673        | -1.91002 | 2.54268  |
| C    | -1.98045        | -2.13087 | -0.85537 |
| H    | -3.04145        | -2.37817 | -0.73679 |
| H    | -1.43982        | -3.06656 | -1.03683 |
| H    | -1.87816        | -1.50494 | -1.74768 |
| C    | -3.51392        | 1.32262  | -1.02614 |
| H    | -3.91261        | 0.43335  | -1.52948 |
| H    | -3.42948        | 2.12008  | -1.77343 |
| H    | -4.22551        | 1.65221  | -0.26266 |

Sum of electronic and thermal Free Energies

= -659.609002 a.u.

Harmonic frequencies = 128.9009i (cm<sup>-1</sup>)

#### Int5

| Atom | coordinates (Å) |          |          |
|------|-----------------|----------|----------|
|      | X               | Y        | Z        |
| C    | -2.26198        | 0.8213   | -0.67446 |
| O    | -3.07452        | 1.43121  | -1.36353 |
| C    | -2.73048        | -0.33678 | 0.17153  |
| C    | -0.84153        | 1.25778  | -0.6692  |
| H    | -0.5641         | 1.85654  | -1.5334  |
| C    | -2.12361        | -1.53957 | 0.22229  |
| H    | -2.62595        | -2.30727 | 0.81584  |
| C    | 0.01897         | 1.02207  | 0.3315   |
| H    | -0.34781        | 0.46381  | 1.19359  |
| C    | -4.06112        | -0.0956  | 0.84783  |

|   |          |          |          |
|---|----------|----------|----------|
| H | -4.40838 | -0.98892 | 1.37556  |
| H | -4.81051 | 0.19366  | 0.10371  |
| H | -3.99976 | 0.72936  | 1.56976  |
| C | -0.86084 | -2.01314 | -0.44753 |
| H | -0.47936 | -1.26292 | -1.13859 |
| H | -1.1044  | -2.89821 | -1.05157 |
| C | 1.47858  | 1.40607  | 0.41127  |
| C | 0.23688  | -2.43728 | 0.58376  |
| H | 0.06553  | -1.92117 | 1.55212  |
| H | 0.09808  | -3.49007 | 0.86908  |
| C | 2.30279  | 0.10836  | 0.67423  |
| H | 2.04707  | -0.27252 | 1.67358  |
| H | 3.36524  | 0.3723   | 0.73728  |
| C | 1.69539  | -2.17115 | 0.45868  |
| C | 2.14765  | -1.04227 | -0.40054 |
| H | 1.44322  | -0.69652 | -1.17419 |
| C | 1.67301  | 2.3357   | 1.63483  |
| H | 1.13768  | 3.28074  | 1.49275  |
| H | 2.7357   | 2.56394  | 1.77974  |
| H | 1.29991  | 1.87059  | 2.55479  |
| C | 1.98105  | 2.12498  | -0.85124 |
| H | 3.04156  | 2.37894  | -0.74338 |
| H | 1.43139  | 3.05788  | -1.0188  |
| H | 1.87321  | 1.50533  | -1.74743 |
| C | 3.49534  | -1.36385 | -1.07221 |
| H | 3.89187  | -0.48226 | -1.59083 |
| H | 3.38415  | -2.16524 | -1.81166 |
| H | 4.22136  | -1.69736 | -0.32416 |

Sum of electronic and thermal Free Energies  
= -659.609578 a.u.

## TS6

| Atom | coordinates (Å) |          |          |
|------|-----------------|----------|----------|
|      | X               | Y        | Z        |
| C    | -2.2298         | 0.79486  | -0.73255 |
| O    | -3.01305        | 1.36681  | -1.4843  |
| C    | -2.73816        | -0.30205 | 0.17292  |
| C    | -0.80214        | 1.21015  | -0.7106  |
| H    | -0.4838         | 1.73676  | -1.60722 |
| C    | -2.15269        | -1.50868 | 0.30728  |
| H    | -2.66424        | -2.23403 | 0.94317  |
| C    | 0.01759         | 1.03771  | 0.33724  |
| H    | -0.39604        | 0.55921  | 1.22519  |
| C    | -4.0737         | 0.00391  | 0.811    |
| H    | -4.44813        | -0.84992 | 1.38347  |
| H    | -4.80429        | 0.26368  | 0.0378   |
| H    | -4.00664        | 0.86844  | 1.48447  |
| C    | -0.89355        | -2.02468 | -0.33475 |
| H    | -0.54176        | -1.33686 | -1.1026  |
| H    | -1.1096         | -2.97673 | -0.8351  |
| C    | 1.48541         | 1.38118  | 0.4411   |
| C    | 0.23148         | -2.29124 | 0.73383  |
| H    | 0.1773          | -1.48725 | 1.48539  |
| H    | -0.02004        | -3.2206  | 1.25982  |
| C    | 2.27401         | 0.05473  | 0.70694  |
| H    | 1.97813         | -0.3286  | 1.69169  |
| H    | 3.33583         | 0.31299  | 0.80077  |
| C    | 1.62295         | -2.35854 | 0.17848  |
| C    | 2.1441          | -1.0676  | -0.39072 |
| H    | 1.41177         | -0.70213 | -1.13294 |
| C    | 1.68862         | 2.30012  | 1.67008  |
| H    | 1.17621         | 3.25816  | 1.52973  |

|   |         |          |          |
|---|---------|----------|----------|
| H | 2.75456 | 2.50418  | 1.8257   |
| H | 1.29691 | 1.83869  | 2.58432  |
| C | 2.02365 | 2.08953  | -0.81216 |
| H | 3.08479 | 2.33046  | -0.68369 |
| H | 1.48737 | 3.02749  | -0.99394 |
| H | 1.92805 | 1.47027  | -1.71028 |
| C | 3.48277 | -1.29784 | -1.11554 |
| H | 3.86037 | -0.37537 | -1.57455 |
| H | 3.36933 | -2.05247 | -1.90065 |
| H | 4.23514 | -1.67016 | -0.41136 |

Sum of electronic and thermal Free Energies  
= -659.602470 a.u.

Harmonic frequencies = 371.7801i (cm<sup>-1</sup>)

## Int6

| Atom | coordinates (Å) |          |          |
|------|-----------------|----------|----------|
|      | X               | Y        | Z        |
| C    | -2.36805        | 0.64247  | -0.6105  |
| O    | -3.26792        | 1.15735  | -1.26569 |
| C    | -2.68951        | -0.47244 | 0.35866  |
| C    | -0.97411        | 1.14216  | -0.74085 |
| H    | -0.78183        | 1.70175  | -1.65317 |
| C    | -2.0342         | -1.64775 | 0.36334  |
| H    | -2.37298        | -2.40641 | 1.0719   |
| C    | -0.05175        | 1.012    | 0.22529  |
| H    | -0.35013        | 0.48918  | 1.1336   |
| C    | -3.896          | -0.21353 | 1.2283   |
| H    | -4.1425         | -1.0864  | 1.84039  |
| H    | -4.7579         | 0.03647  | 0.60015  |
| H    | -3.73364        | 0.64238  | 1.89689  |
| C    | -0.91331        | -2.07209 | -0.54807 |
| H    | -0.83032        | -1.38899 | -1.39467 |
| H    | -1.14363        | -3.05313 | -0.97867 |
| C    | 1.37175         | 1.51762  | 0.24688  |
| C    | 0.48109         | -2.16446 | 0.18099  |
| H    | 0.44601         | -1.6318  | 1.14646  |
| H    | 0.67003         | -3.22448 | 0.41044  |
| C    | 2.31598         | 0.3386   | 0.64415  |
| H    | 1.95874         | -0.09273 | 1.58868  |
| H    | 3.29961         | 0.77606  | 0.86893  |
| C    | 1.50831         | -1.76607 | -0.82483 |
| C    | 2.54205         | -0.78172 | -0.40042 |
| H    | 2.9988          | -0.33774 | -1.29513 |
| C    | 1.46538         | 2.58162  | 1.37094  |
| H    | 0.8038          | 3.42933  | 1.16211  |
| H    | 2.49123         | 2.96017  | 1.45466  |
| H    | 1.18097         | 2.16248  | 2.34348  |
| C    | 1.7993          | 2.1556   | -1.08502 |
| H    | 2.85209         | 2.45829  | -1.04193 |
| H    | 1.206           | 3.0518   | -1.29781 |
| H    | 1.68006         | 1.46769  | -1.92801 |
| C    | 3.61333         | -1.79389 | 0.14857  |
| H    | 4.55787         | -1.25649 | 0.28098  |
| H    | 3.78073         | -2.6222  | -0.54582 |
| H    | 3.30875         | -2.20276 | 1.11757  |

Sum of electronic and thermal Free Energies  
= -659.609836 a.u.

## TS7

| Atom | coordinates (Å) |  |  |
|------|-----------------|--|--|
|------|-----------------|--|--|

|   | X        | Y        | Z        |
|---|----------|----------|----------|
| C | -2.39004 | 0.61668  | -0.58806 |
| O | -3.3181  | 1.12878  | -1.20684 |
| C | -2.65002 | -0.57009 | 0.30736  |
| C | -1.02536 | 1.19897  | -0.69927 |
| H | -0.86805 | 1.79934  | -1.59227 |
| C | -1.90255 | -1.69114 | 0.29852  |
| H | -2.22961 | -2.50279 | 0.95274  |
| C | -0.09018 | 1.07864  | 0.25319  |
| H | -0.35136 | 0.50708  | 1.14333  |
| C | -3.92032 | -0.46128 | 1.1187   |
| H | -4.11229 | -1.37852 | 1.68365  |
| H | -4.77005 | -0.26658 | 0.45567  |
| H | -3.87524 | 0.37697  | 1.8266   |
| C | -0.69787 | -2.0078  | -0.54717 |
| H | -0.55254 | -1.24449 | -1.31286 |
| H | -0.87976 | -2.94383 | -1.09075 |
| C | 1.31539  | 1.63565  | 0.2671   |
| C | 0.62166  | -2.17128 | 0.27281  |
| H | 0.54302  | -1.5893  | 1.20912  |
| H | 0.71461  | -3.22218 | 0.57719  |
| C | 2.29414  | 0.4706   | 0.63464  |
| H | 1.95804  | 0.02201  | 1.5772   |
| H | 3.27842  | 0.91793  | 0.82973  |
| C | 1.75199  | -1.79502 | -0.66879 |
| C | 2.46172  | -0.61469 | -0.43313 |
| H | 3.14484  | -0.29757 | -1.22851 |
| C | 1.39812  | 2.68709  | 1.40161  |
| H | 0.71658  | 3.5218   | 1.20514  |
| H | 2.41588  | 3.08749  | 1.48302  |
| H | 1.12759  | 2.25195  | 2.37092  |
| C | 1.71534  | 2.29129  | -1.06483 |
| H | 2.75529  | 2.63605  | -1.02372 |
| H | 1.08695  | 3.16333  | -1.27626 |
| H | 1.61986  | 1.59727  | -1.90631 |
| C | 3.41236  | -2.09504 | -0.00041 |
| H | 3.96421  | -1.55981 | 0.79106  |
| H | 4.07923  | -2.3541  | -0.81883 |
| H | 3.0129   | -2.9877  | 0.4852   |

Sum of electronic and thermal Free Energies  
= -659.593526 a.u.

Harmonic frequencies = 492.9688i (cm<sup>-1</sup>)

**Table S17.** Cartesian coordinates and Gibbs free energies of TS1, Int1, TS2, Int2, and TS3 at the B3LYP/6-31G(d) level at 308.15 K in Gas phase (Figure 8).

TS1

| Atom | coordinates (Å) |          |          |
|------|-----------------|----------|----------|
|      | X               | Y        | Z        |
| C    | 0.99134         | -2.08822 | -0.13293 |
| O    | 1.16043         | -3.19161 | 0.35992  |
| C    | 2.06968         | -1.05458 | -0.18416 |
| C    | -0.39396        | -1.59098 | -0.56146 |
| H    | -0.56622        | -1.52715 | -1.65153 |
| C    | 1.83321         | 0.08606  | -0.8617  |
| H    | 0.93734         | 0.12008  | -1.47502 |
| C    | -1.19364        | -1.01535 | 0.42341  |

|   |          |          |          |
|---|----------|----------|----------|
| H | -1.13361 | -2.32232 | 0.20147  |
| C | 3.28736  | -1.35688 | 0.64899  |
| H | 4.03514  | -0.56257 | 0.58464  |
| H | 3.74715  | -2.29216 | 0.31035  |
| H | 3.01959  | -1.50998 | 1.701    |
| C | 2.51468  | 1.41969  | -0.76264 |
| H | 3.14277  | 1.62627  | -1.6412  |
| H | 3.17461  | 1.45364  | 0.11013  |
| C | -2.45904 | -0.27632 | 0.01055  |
| C | 1.41722  | 2.53308  | -0.6676  |
| H | 1.8952   | 3.46365  | -0.33222 |
| H | 1.02806  | 2.72007  | -1.67577 |
| C | -2.13211 | 1.21978  | 0.40297  |
| H | -2.02371 | 1.26142  | 1.48957  |
| H | -3.02413 | 1.80989  | 0.14372  |
| C | 0.26535  | 2.14646  | 0.24871  |
| C | -0.92185 | 1.80149  | -0.2834  |
| H | -1.02021 | 1.90492  | -1.36568 |
| C | -3.62589 | -0.74737 | 0.9018   |
| H | -3.91825 | -1.77489 | 0.65143  |
| H | -4.50787 | -0.10848 | 0.7664   |
| H | -3.33404 | -0.73112 | 1.95633  |
| C | -2.88883 | -0.35796 | -1.4698  |
| H | -3.78332 | 0.2509   | -1.64916 |
| H | -3.13484 | -1.38971 | -1.75142 |
| H | -2.11227 | -0.00464 | -2.15751 |
| C | 0.59993  | 2.09598  | 1.71852  |
| H | -0.25881 | 1.84494  | 2.34354  |
| H | 0.99608  | 3.06396  | 2.05517  |
| H | 1.37727  | 1.34689  | 1.91885  |

Sum of electronic and thermal Free Energies

= -659.601156 a.u.

Harmonic frequencies = 1206.1414i (cm<sup>-1</sup>)

Int1

| Atom | coordinates (Å) |          |          |
|------|-----------------|----------|----------|
|      | X               | Y        | Z        |
| C    | 1.09172         | -2.1309  | -0.1139  |
| O    | 1.45912         | -3.22112 | 0.29542  |
| C    | 2.02327         | -0.95826 | -0.12829 |
| C    | -0.37643        | -1.88548 | -0.50058 |
| H    | -0.50327        | -1.68967 | -1.58014 |
| C    | 1.70182         | 0.14357  | -0.8336  |
| H    | 0.81256         | 0.10022  | -1.45683 |
| C    | -1.0436         | -0.96599 | 0.46105  |
| H    | -0.89857        | -2.84257 | -0.30627 |
| C    | 3.26298         | -1.13089 | 0.71141  |
| H    | 3.93728         | -0.27438 | 0.64161  |
| H    | 3.80398         | -2.02691 | 0.38907  |
| H    | 3.00329         | -1.29302 | 1.76433  |
| C    | 2.34447         | 1.50282  | -0.79663 |
| H    | 2.9683          | 1.67313  | -1.68639 |
| H    | 3.0082          | 1.59009  | 0.06901  |
| C    | -2.33758        | -0.33538 | 0.02477  |
| C    | 1.24692         | 2.61414  | -0.74586 |
| H    | 1.7238          | 3.56121  | -0.4589  |
| H    | 0.84151         | 2.75283  | -1.75537 |
| C    | -2.2103         | 1.18716  | 0.40641  |
| H    | -2.09626        | 1.25468  | 1.49055  |
| H    | -3.16183        | 1.67082  | 0.13892  |
| C    | 0.11856         | 2.24998  | 0.20219  |
| C    | -1.05967        | 1.84791  | -0.30644 |

|   |          |          |          |
|---|----------|----------|----------|
| H | -1.17551 | 1.91621  | -1.38941 |
| C | -3.39836 | -0.97458 | 0.96867  |
| H | -3.54865 | -2.03568 | 0.73803  |
| H | -4.35844 | -0.46238 | 0.82998  |
| H | -3.09498 | -0.88984 | 2.01537  |
| C | -2.80919 | -0.49512 | -1.43816 |
| H | -3.76122 | 0.02499  | -1.60036 |
| H | -2.96571 | -1.54976 | -1.69297 |
| H | -2.08728 | -0.0871  | -2.1545  |
| C | 0.46991  | 2.26064  | 1.66866  |
| H | -0.38937 | 2.06753  | 2.31347  |
| H | 0.89663  | 3.23255  | 1.9513   |
| H | 1.22549  | 1.49838  | 1.89788  |

Sum of electronic and thermal Free Energies  
= -659.616931 a.u.

### TS2

| Atom | coordinates (Å) |          |          |
|------|-----------------|----------|----------|
|      | X               | Y        | Z        |
| C    | 1.64405         | -1.86599 | -0.22442 |
| O    | 2.2733          | -2.86323 | 0.09358  |
| C    | 2.21974         | -0.49276 | -0.09054 |
| C    | 0.13402         | -2.06438 | -0.62538 |
| H    | 0.10616         | -2.05892 | -1.73688 |
| C    | 1.68737         | 0.55688  | -0.75694 |
| H    | 0.9497          | 0.34268  | -1.51751 |
| C    | -0.69097        | -0.89786 | -0.34934 |
| H    | -0.14527        | -3.09343 | -0.32165 |
| C    | 3.3475          | -0.39401 | 0.91095  |
| H    | 3.76726         | 0.61417  | 0.95515  |
| H    | 4.14847         | -1.08984 | 0.63802  |
| H    | 3.02333         | -0.67986 | 1.92021  |
| C    | 1.8935          | 2.0332   | -0.53075 |
| H    | 2.65087         | 2.43548  | -1.22149 |
| H    | 2.27356         | 2.22087  | 0.47979  |
| C    | -2.10718        | -0.85405 | 0.02132  |
| C    | 0.57107         | 2.83905  | -0.7714  |
| H    | 0.77051         | 3.88622  | -0.50132 |
| H    | 0.35677         | 2.82484  | -1.84741 |
| C    | -2.62558        | 0.65865  | -0.11076 |
| H    | -2.98289        | 1.00452  | 0.86563  |
| H    | -3.49756        | 0.67201  | -0.77747 |
| C    | -0.6316         | 2.29813  | -0.0152  |
| C    | -1.5499         | 1.56471  | -0.66529 |
| H    | -1.42535        | 1.48115  | -1.74704 |
| C    | -1.96696        | -1.20744 | 1.54822  |
| H    | -1.68287        | -2.25473 | 1.68957  |
| H    | -2.94169        | -1.0418  | 2.0194   |
| H    | -1.23283        | -0.57042 | 2.05108  |
| C    | -3.08265        | -1.85047 | -0.63878 |
| H    | -4.0885         | -1.75971 | -0.2096  |
| H    | -2.74856        | -2.88536 | -0.50383 |
| H    | -3.16515        | -1.65666 | -1.71478 |
| C    | -0.60427        | 2.49002  | 1.48021  |
| H    | -1.54124        | 2.19455  | 1.9605   |
| H    | -0.41165        | 3.53967  | 1.74078  |
| H    | 0.20171         | 1.89835  | 1.93881  |

Sum of electronic and thermal Free Energies  
= -659.592891 a.u.

Harmonic frequencies = 215.8394i (cm<sup>-1</sup>)

### Int2

| Atom | coordinates (Å) |          |          |
|------|-----------------|----------|----------|
|      | X               | Y        | Z        |
| C    | 0.66578         | 2.17047  | -0.16092 |
| O    | 1.13243         | 3.07846  | 0.50597  |
| C    | -0.79324        | 1.86098  | -0.10415 |
| C    | 1.6223          | 1.33096  | -1.07134 |
| H    | 1.54698         | 1.77511  | -2.07523 |
| C    | -1.30347        | 0.84872  | -0.83299 |
| H    | -0.62463        | 0.33609  | -1.5251  |
| C    | 1.42063         | -0.15555 | -1.15097 |
| H    | 2.6208          | 1.57595  | -0.68227 |
| C    | -1.56682        | 2.73715  | 0.84984  |
| H    | -2.61571        | 2.44325  | 0.92534  |
| H    | -1.52852        | 3.78101  | 0.51786  |
| H    | -1.11648        | 2.71964  | 1.84811  |
| C    | -2.68762        | 0.25894  | -0.7489  |
| H    | -3.29849        | 0.6091   | -1.59426 |
| H    | -3.1931         | 0.60506  | 0.15806  |
| C    | 1.78705         | -0.9488  | 0.07102  |
| C    | -2.65928        | -1.30348 | -0.77372 |
| H    | -3.64383        | -1.67111 | -0.45494 |
| H    | -2.51184        | -1.63463 | -1.80795 |
| C    | 1.00224         | -2.32171 | 0.06556  |
| H    | 0.98525         | -2.72228 | 1.08601  |
| H    | 1.55442         | -3.04164 | -0.5505  |
| C    | -1.53541        | -1.84544 | 0.09017  |
| C    | -0.37477        | -2.1442  | -0.51549 |
| H    | -0.36856        | -2.10089 | -1.60212 |
| C    | 1.68471         | -0.29221 | 1.4658   |
| H    | 2.22276         | 0.6594   | 1.51727  |
| H    | 2.10742         | -0.95312 | 2.23297  |
| H    | 0.63975         | -0.10236 | 1.73098  |
| C    | 3.29777         | -1.24019 | -0.23278 |
| H    | 3.64128         | -2.00879 | 0.469    |
| H    | 3.91682         | -0.34796 | -0.09428 |
| H    | 3.44114         | -1.61426 | -1.25147 |
| C    | -1.77303        | -1.8521  | 1.57896  |
| H    | -0.91746        | -2.23789 | 2.13947  |
| H    | -2.64487        | -2.47402 | 1.8254   |
| H    | -1.99361        | -0.84461 | 1.95928  |

Sum of electronic and thermal Free Energies  
= -659.611479 a.u.

### TS3

| Atom | coordinates (Å) |         |          |
|------|-----------------|---------|----------|
|      | X               | Y       | Z        |
| C    | 0.35437         | 2.16508 | -0.28355 |
| O    | 0.89846         | 3.08975 | 0.3055   |
| C    | -1.05063        | 1.76105 | 0.00238  |
| C    | 1.16372         | 1.34526 | -1.30515 |
| H    | 1.08269         | 1.77405 | -2.31445 |
| C    | -1.61887        | 0.8154  | -0.77156 |
| H    | -1.05592        | 0.48894 | -1.64337 |
| C    | 1.83377         | 0.10992 | -1.22129 |
| H    | 2.42086         | 1.34429 | -1.27567 |
| C    | -1.67309        | 2.41849 | 1.2066   |
| H    | -2.71038        | 2.10953 | 1.35518  |
| H    | -1.64953        | 3.50756 | 1.0906   |
| H    | -1.10345        | 2.19558 | 2.11674  |

|   |          |          |          |
|---|----------|----------|----------|
| C | -2.86839 | 0.01754  | -0.53627 |
| H | -3.66505 | 0.31341  | -1.23442 |
| H | -3.25618 | 0.18554  | 0.47357  |
| C | 2.01265  | -0.66304 | 0.08167  |
| C | -2.55686 | -1.49857 | -0.75615 |
| H | -3.42819 | -2.08544 | -0.43756 |
| H | -2.43338 | -1.66928 | -1.8324  |
| C | 1.284    | -2.04365 | -0.17034 |
| H | 1.32725  | -2.60503 | 0.77061  |
| H | 1.87288  | -2.60021 | -0.90876 |
| C | -1.29469 | -1.93236 | -0.02682 |
| C | -0.12342 | -1.90384 | -0.6856  |
| H | -0.16472 | -1.6657  | -1.74939 |
| C | 1.51367  | -0.05692 | 1.41173  |
| H | 1.96484  | 0.92332  | 1.59788  |
| H | 1.78605  | -0.70836 | 2.25223  |
| H | 0.42711  | 0.05971  | 1.42427  |
| C | 3.52465  | -0.96241 | 0.22141  |
| H | 3.70336  | -1.67759 | 1.03436  |
| H | 4.08305  | -0.04769 | 0.45693  |
| H | 3.92672  | -1.37287 | -0.70936 |
| C | -1.45973 | -2.26197 | 1.43554  |
| H | -0.5189  | -2.53952 | 1.91654  |
| H | -2.16455 | -3.09526 | 1.56352  |
| H | -1.87912 | -1.4129  | 1.99338  |

Sum of electronic and thermal Free Energies  
= -659.598687 a.u.

Harmonic frequencies = 1130.6758i (cm<sup>-1</sup>)

**Table S18.** Cartesian coordinates and Gibbs free energies of protonated (2*E*,6*E*,10*E*)-isomer, TS1, and protonated (2*Z*,6*E*,10*E*)-isomer at the B3LYP/6-31G(d) level with self-consistent reaction field (SCRF) = (polarizable continuum model (PCM), tetrahydrofuran (THF)) at 308.15 K (Figure 9a).

protonated (2*E*,6*E*,10*E*)-isomer

| Atom | coordinates (Å) |          |          |
|------|-----------------|----------|----------|
|      | X               | Y        | Z        |
| C    | 1.52699         | -1.82313 | -0.09647 |
| C    | 2.19167         | -0.54945 | 0.04478  |
| C    | 0.10861         | -1.92979 | -0.29409 |
| H    | -0.26579        | -2.76755 | -0.87837 |
| C    | 1.62542         | 0.49815  | -0.62939 |
| H    | 0.82308         | 0.2546   | -1.31577 |
| C    | -0.73192        | -1.01224 | 0.2619   |
| H    | -0.29482        | -0.32062 | 0.97569  |
| C    | 3.47808         | -0.48198 | 0.83214  |
| H    | 3.76984         | 0.55391  | 1.01544  |
| H    | 4.28944         | -0.96555 | 0.27598  |
| H    | 3.38717         | -0.998   | 1.79283  |
| C    | 1.95202         | 1.95373  | -0.57438 |
| H    | 2.70822         | 2.18992  | -1.33814 |
| H    | 2.3967          | 2.22232  | 0.3894   |
| C    | -2.21105        | -0.83538 | 0.05101  |
| C    | 0.6697          | 2.79917  | -0.86576 |

|   |          |          |          |
|---|----------|----------|----------|
| H | 0.9088   | 3.85224  | -0.67616 |
| H | 0.42921  | 2.7052   | -1.93059 |
| C | -2.49537 | 0.71881  | 0.13246  |
| H | -2.56034 | 0.99976  | 1.18758  |
| H | -3.48811 | 0.88825  | -0.30333 |
| C | -0.5081  | 2.33532  | -0.02529 |
| C | -1.4417  | 1.53384  | -0.57536 |
| H | -1.37418 | 1.35823  | -1.65044 |
| C | -2.95758 | -1.53653 | 1.21674  |
| H | -2.83549 | -2.62316 | 1.16264  |
| H | -4.02641 | -1.30553 | 1.15141  |
| H | -2.59421 | -1.19535 | 2.19188  |
| C | -2.68775 | -1.41219 | -1.29334 |
| H | -3.7645  | -1.24799 | -1.40417 |
| H | -2.51473 | -2.49226 | -1.35471 |
| H | -2.18321 | -0.93812 | -2.14203 |
| C | -0.46018 | 2.74757  | 1.42612  |
| H | -1.31599 | 2.39571  | 2.00576  |
| H | -0.43455 | 3.8426   | 1.50027  |
| H | 0.45198  | 2.38491  | 1.91995  |
| O | 2.29476  | -2.88896 | -0.02482 |
| H | 1.77678  | -3.71716 | -0.04297 |

Sum of electronic and thermal Free Energies  
= -660.138819 a.u.

TS1

| Atom | coordinates (Å) |          |          |
|------|-----------------|----------|----------|
|      | X               | Y        | Z        |
| C    | 1.88318         | -1.48703 | 0.07221  |
| C    | 2.27656         | -0.21149 | 0.28604  |
| C    | 0.49462         | -1.8468  | -0.25534 |
| H    | 0.35561         | -2.35524 | -1.20881 |
| C    | 1.4474          | 0.98466  | 0.30482  |
| H    | 1.01889         | 1.29618  | 1.25954  |
| C    | -0.55144        | -1.4473  | 0.47925  |
| H    | -0.35684        | -0.99649 | 1.4543   |
| C    | 3.74819         | 0.17329  | 0.49124  |
| H    | 3.87698         | 0.93442  | 1.26829  |
| H    | 4.19602         | 0.54839  | -0.43591 |
| H    | 4.28024         | -0.72848 | 0.80399  |
| C    | 1.45822         | 2.01138  | -0.76473 |
| H    | 1.41595         | 1.5259   | -1.74719 |
| H    | 2.45328         | 2.49428  | -0.741   |
| C    | -1.99128        | -1.37184 | 0.02781  |
| C    | 0.33536         | 3.02286  | -0.5199  |
| H    | 0.62644         | 3.68367  | 0.30608  |
| H    | 0.18359         | 3.67547  | -1.3885  |
| C    | -2.32574        | 0.16602  | 0.01923  |
| H    | -2.58147        | 0.47191  | 1.03885  |
| H    | -3.2314         | 0.31751  | -0.58681 |
| C    | -0.94939        | 2.31612  | -0.1201  |
| C    | -1.19857        | 1.03141  | -0.49736 |
| H    | -0.58196        | 0.59306  | -1.27746 |
| C    | -2.91681        | -2.07205 | 1.04361  |
| H    | -2.75064        | -3.15479 | 1.03735  |
| H    | -3.9683         | -1.88772 | 0.79526  |
| H    | -2.74038        | -1.70697 | 2.06182  |
| C    | -2.21332        | -1.96778 | -1.37177 |
| H    | -3.27251        | -1.89746 | -1.64124 |
| H    | -1.93088        | -3.02592 | -1.40174 |
| H    | -1.63917        | -1.44285 | -2.14369 |
| C    | -1.86503        | 3.12159  | 0.75531  |

|   |          |          |          |
|---|----------|----------|----------|
| H | -2.83286 | 2.6485   | 0.92563  |
| H | -2.04014 | 4.10207  | 0.29277  |
| H | -1.39356 | 3.32421  | 1.72724  |
| O | 2.83905  | -2.45416 | -0.00815 |
| H | 2.40903  | -3.32457 | -0.03557 |

Sum of electronic and thermal Free Energies

= -660.073779 a.u.

Harmonic frequencies = 515.3446i (cm<sup>-1</sup>)

protonated (2Z,6E,10E)-isomer

| Atom | coordinates (Å) |          |          |
|------|-----------------|----------|----------|
|      | X               | Y        | Z        |
| C    | 1.68041         | -1.40627 | -0.27883 |
| C    | 2.35101         | -0.26275 | 0.32644  |
| C    | 0.28125         | -1.53523 | -0.51059 |
| H    | -0.03411        | -2.2585  | -1.25899 |
| C    | 2.14073         | 1.01506  | -0.09284 |
| H    | 2.73324         | 1.77029  | 0.42511  |
| C    | -0.64129        | -0.87693 | 0.24856  |
| H    | -0.27416        | -0.2748  | 1.07503  |
| C    | 3.43029         | -0.59002 | 1.3433   |
| H    | 3.80594         | 0.32818  | 1.8006   |
| H    | 4.27163         | -1.10528 | 0.86778  |
| H    | 3.04869         | -1.2434  | 2.13495  |
| C    | 1.37437         | 1.54652  | -1.2644  |
| H    | 0.86416         | 0.7524   | -1.81393 |
| H    | 2.12819         | 1.97314  | -1.94336 |
| C    | -2.14574        | -0.97538 | 0.13657  |
| C    | 0.3578          | 2.68257  | -0.93573 |
| H    | 0.88697         | 3.53027  | -0.48587 |
| H    | -0.0495         | 3.0278   | -1.89227 |
| C    | -2.6608         | 0.50741  | 0.22391  |
| H    | -2.71917        | 0.80284  | 1.2752   |
| H    | -3.67942        | 0.54817  | -0.17928 |
| C    | -0.74771        | 2.18567  | -0.02629 |
| C    | -1.71129        | 1.39681  | -0.54056 |
| H    | -1.72125        | 1.26253  | -1.62335 |
| C    | -2.67275        | -1.79221 | 1.34291  |
| H    | -2.34744        | -2.83631 | 1.28578  |
| H    | -3.76812        | -1.77491 | 1.33806  |
| H    | -2.33113        | -1.37374 | 2.29566  |
| C    | -2.60425        | -1.63318 | -1.17508 |
| H    | -3.69798        | -1.64464 | -1.21402 |
| H    | -2.26461        | -2.67229 | -1.24763 |
| H    | -2.24088        | -1.09208 | -2.05521 |
| C    | -0.58651        | 2.52921  | 1.43201  |
| H    | -1.38868        | 2.14573  | 2.06596  |
| H    | -0.55304        | 3.61948  | 1.55488  |
| H    | 0.36845         | 2.1503   | 1.82542  |
| O    | 2.48631         | -2.4002  | -0.58634 |
| H    | 1.99857         | -3.18122 | -0.91608 |

Sum of electronic and thermal Free Energies

= -660.135496 a.u.

**Table S19.** Cartesian coordinates and Gibbs free energies of protonated TS1 and protonated (2E,6E,10Z)-isomer at the B3LYP/6-31G(d) level with SCRF = (PCM, THF) at 308.15 K

(Figure 9b).

TS1

| Atom | coordinates (Å) |          |          |
|------|-----------------|----------|----------|
|      | X               | Y        | Z        |
| C    | 1.1183          | -2.04455 | -0.28957 |
| C    | 1.81195         | -0.75963 | 0.0244   |
| C    | -0.19164        | -2.10835 | -0.61325 |
| H    | -0.70358        | -3.06194 | -0.74804 |
| C    | 1.73612         | 0.26759  | -0.84671 |
| H    | 1.26945         | 0.07934  | -1.81421 |
| C    | -1.0135         | -0.90787 | -0.76357 |
| H    | -0.97842        | -0.38901 | -1.72192 |
| C    | 2.53649         | -0.75428 | 1.34892  |
| H    | 2.97888         | 0.21642  | 1.57576  |
| H    | 3.3397          | -1.4996  | 1.33718  |
| H    | 1.8598          | -1.0299  | 2.16702  |
| C    | 2.223           | 1.67836  | -0.64786 |
| H    | 3.00954         | 1.89853  | -1.38202 |
| H    | 2.67436         | 1.80175  | 0.33959  |
| C    | -2.03666        | -0.43719 | 0.14292  |
| C    | 1.08534         | 2.73047  | -0.83845 |
| H    | 1.48074         | 3.71227  | -0.54926 |
| H    | 0.82494         | 2.78378  | -1.9016  |
| C    | -2.37079        | 1.0849   | -0.05907 |
| H    | -2.65902        | 1.48589  | 0.9166   |
| H    | -3.2443         | 1.18782  | -0.71065 |
| C    | -0.14136        | 2.36635  | -0.02867 |
| C    | -1.19678        | 1.82465  | -0.66303 |
| H    | -1.16402        | 1.81359  | -1.75262 |
| C    | -1.89954        | -0.84859 | 1.61093  |
| H    | -1.66434        | -1.91036 | 1.71795  |
| H    | -2.83534        | -0.64349 | 2.13855  |
| H    | -1.10344        | -0.26929 | 2.08812  |
| C    | -3.18099        | -1.36577 | -0.55262 |
| H    | -4.09258        | -1.00218 | -0.06721 |
| H    | -3.0424         | -2.422   | -0.32225 |
| H    | -3.2829         | -1.2133  | -1.62949 |
| C    | -0.03205        | 2.54524  | 1.46365  |
| H    | -0.96814        | 2.34004  | 1.98842  |
| H    | 0.26545         | 3.57603  | 1.69472  |
| H    | 0.7427          | 1.89624  | 1.89229  |
| O    | 1.89999         | -3.12854 | -0.09118 |
| H    | 1.40548         | -3.95029 | -0.25563 |

Sum of electronic and thermal Free Energies

= -660.074191 a.u.

Harmonic frequencies = 627.0559i (cm<sup>-1</sup>)

protonated (2E,6E,10Z)-isomer

| Atom | coordinates (Å) |          |          |
|------|-----------------|----------|----------|
|      | X               | Y        | Z        |
| C    | -1.90434        | -1.14737 | -0.30736 |
| C    | -0.72457        | -1.85582 | 0.0818   |
| C    | -1.95991        | 0.03635  | -1.15986 |
| H    | -2.6201         | -0.09356 | -2.01855 |
| C    | 0.40155         | -1.61038 | -0.65979 |
| H    | 0.27674         | -0.98463 | -1.5358  |
| C    | -1.39814        | 1.25798  | -0.99795 |
| H    | -1.60129        | 1.93888  | -1.82533 |

|   |          |          |          |
|---|----------|----------|----------|
| C | -0.82415 | -2.85538 | 1.20919  |
| H | 0.15653  | -3.25204 | 1.4744   |
| H | -1.45948 | -3.69825 | 0.91573  |
| H | -1.27214 | -2.40452 | 2.10016  |
| C | 1.79198  | -2.1076  | -0.43466 |
| H | 1.96372  | -2.99459 | -1.06395 |
| H | 1.93402  | -2.42841 | 0.60146  |
| C | -0.67788 | 1.94249  | 0.14573  |
| C | 2.80919  | -0.99159 | -0.8108  |
| H | 3.81198  | -1.3125  | -0.50863 |
| H | 2.81799  | -0.87367 | -1.90002 |
| C | 0.79432  | 2.31919  | -0.29716 |
| H | 1.26733  | 2.79215  | 0.56992  |
| H | 0.7283   | 3.08455  | -1.07973 |
| C | 2.40356  | 0.31557  | -0.14427 |
| C | 1.57989  | 1.14717  | -0.81056 |
| H | 1.37268  | 0.9014   | -1.85273 |
| C | -0.65504 | 1.15899  | 1.46692  |
| H | -1.65911 | 0.81285  | 1.74087  |
| H | -0.30738 | 1.81495  | 2.27163  |
| H | 0.0116   | 0.29719  | 1.43336  |
| C | -1.44526 | 3.27202  | 0.38242  |
| H | -0.92786 | 3.86111  | 1.14714  |
| H | -2.46559 | 3.08148  | 0.73224  |
| H | -1.50146 | 3.87409  | -0.53082 |
| C | 2.88705  | 0.51096  | 1.26917  |
| H | 2.50953  | 1.42637  | 1.72984  |
| H | 3.98451  | 0.55286  | 1.28145  |
| H | 2.60437  | -0.33347 | 1.91219  |
| O | -3.03636 | -1.66365 | 0.117    |
| H | -3.80341 | -1.10846 | -0.12771 |

---

Sum of electronic and thermal Free Energies  
= -660.128747 a.u.
